# Supplementary material for: Effects of nutritional intervention strategies in the primary prevention of overweight and obesity in school settings: systematic review and network meta-analysis
Source: PubMed Central journal article supplement — BMJ Med. 2022 Dec 23;1(1):e000346. doi: 10.1136/bmjmed-2022-000346 (PMC9951385; doi:10.1136/bmjmed-2022-000346), 2022-12-23
Supplement: bmjmed-2022-000346supp001.pdf [file bmjmed-2022-000346supp001.pdf]

## Data supplement

### Effects of nutrition intervention strategies in the primary prevention of overweight and obesity in school settings: a systematic review and network meta-analysis

Edris Nury<sup>1,2</sup> (researcher), Julia Stadelmaier<sup>1</sup> (researcher), Jakub Morze<sup>3,4</sup> (doctoral researcher), Blin Nagavci<sup>1</sup> (medical doctor), Kathrin Grummich<sup>1,5,6</sup> (information specialist), Guido Schwarzer<sup>6</sup> (statistician), Georg Hoffmann<sup>7</sup> (senior lecturer), Claudia M Angele<sup>7,8</sup> (assistant professor), Jürgen M Steinacker<sup>9</sup> (professor), Janine Wendt<sup>9</sup> (doctoral researcher), Johanna Conrad<sup>10</sup> (head of department), Daniela Schmid<sup>11</sup> (professor), Joerg J Meerpohl<sup>1,5</sup> (professor), Lukas Schwingshackl<sup>1</sup> (group leader)

<sup>1</sup> Institute for Evidence in Medicine, Medical Center - University of Freiburg, Faculty of Medicine, University of Freiburg, Freiburg, Germany.

<sup>2</sup> Department of General Practice and Primary Care, University Medical Center Hamburg-Eppendorf, Hamburg, Germany

<sup>3</sup> Department of Cardiology and Internal Diseases, University of Warmia and Mazury, Olsztyn, Poland.

<sup>4</sup> Department of Human Nutrition, University of Warmia and Mazury, Olsztyn, Poland.

<sup>5</sup> Cochrane Germany, Cochrane Germany Foundation, Freiburg, Germany.

<sup>6</sup> Institute of Medical Biometry and Statistics, Medical Center - University of Freiburg, Faculty of Medicine, University of Freiburg, Freiburg, Germany.

<sup>7</sup> Department of Nutritional Sciences, University of Vienna, Vienna, Austria.

<sup>8</sup> Centre for Teacher Education, University of Vienna, Vienna, Austria.

<sup>9</sup> Division of Sports and Rehabilitation Medicine, Ulm University Hospital, Ulm, Germany.

<sup>10</sup> Science Department, German Nutrition Society, Bonn, Germany.

<sup>11</sup> Division for Quantitative Methods in Public Health and Health Services Research, Department of Public Health, Health Services Research and Health Technology Assessment, UMIT - Private University for Health Sciences, Medical Informatics and Technology, Hall in Tyrol, Austria.

**Table of contents**

|                                                                                                                                              |    |
|----------------------------------------------------------------------------------------------------------------------------------------------|----|
| Supplementary Table 1. Deviations from the study protocol .....                                                                              | 7  |
| Supplementary Table 2. Definitions of overweight and obesity in school-aged children and adolescents .....                                   | 8  |
| Supplementary Table 3. Search strategies for all electronic databases .....                                                                  | 9  |
| Supplementary Table 4. Additional study information and data received from study authors .....                                               | 14 |
| Supplementary Table 5. Additional risk of bias guidance for the included cluster randomised controlled trials.....                           | 15 |
| Supplementary Table 6. Study exclusions at full-text assessment .....                                                                        | 16 |
| Supplementary Table 7. Study characteristics of the 51 randomised controlled trials included in the current systematic review .....          | 17 |
| Supplementary Table 8. Description of intervention and control group characteristics .....                                                   | 32 |
| Supplementary Table 9. Reporting of study funding in the 51 included cluster RCTs.....                                                       | 42 |
| Supplementary Table 10: Pairwise meta-analysis of all interventions vs control for BMI.....                                                  | 45 |
| Supplementary Table 11: Pairwise meta-analysis of all interventions vs control for zBMI .....                                                | 45 |
| Supplementary Table 12: GRADE evaluation for BMI and all comparisons (study duration: range 2-36 months)*.....                               | 46 |
| Supplementary Table 13: GRADE evaluation for zBMI and all comparisons (study duration: range 9-68 months)*.....                              | 48 |
| Supplementary Table 14: Pairwise meta-analysis of all interventions vs control for body weight change.....                                   | 49 |
| Supplementary Table 15: Pairwise meta-analysis of all interventions vs control for body fat .....                                            | 49 |
| Supplementary Table 16: Pairwise meta-analysis of all interventions vs control for waist circumference .....                                 | 49 |
| Supplementary Table 17: GRADE evaluation for body weight change (kg) and all comparisons (study duration: range 2-36 months)* .....          | 50 |
| Supplementary Table 18: GRADE evaluation for body fat (% body fat) and all comparisons (study duration: range 2-36 months)* .....            | 51 |
| Supplementary Table 19: GRADE evaluation for waist circumference and all comparisons (study duration: range 2-36 months)* .....              | 52 |
| Supplementary Table 20: Pairwise meta-analysis of all interventions vs control for fruit and vegetable intake .....                          | 53 |
| Supplementary Table 21: Pairwise meta-analysis of all interventions v. control for fruit intake .....                                        | 53 |
| Supplementary Table 22: Pairwise meta-analysis of all interventions vs control for vegetable intake .....                                    | 54 |
| Supplementary Table 23: GRADE evaluation for fruit and vegetable intake (g/d) and all comparisons (study duration: range 1-36 months)* ..... | 55 |
| Supplementary Table 24: GRADE evaluation for fruit intake (g/d) and all comparisons (study duration: range 1-36 months)* .....               | 57 |
| Supplementary Table 25: GRADE evaluation for vegetable intake (g/d) and all comparisons (study duration: range 1-36 months)* .....           | 58 |

|                                                                                                                                                     |    |
|-----------------------------------------------------------------------------------------------------------------------------------------------------|----|
| Supplementary Table 26: Pairwise meta-analysis of all interventions vs control for fat intake (mean difference) .....                               | 59 |
| Supplementary Table 27: GRADE evaluation for fat intake (g/d) and all comparisons* .....                                                            | 60 |
| Supplementary Table 28: Pairwise meta-analysis of multicomponent intervention vs control for SSB intake (mean difference).....                      | 61 |
| Supplementary Table 29: GRADE evidence profile for pairwise (multicomponent intervention vs control group) comparisons on continuous outcomes. .... | 62 |
| Supplementary Table 30: Relative ranking of nutrition interventions (P-scores*) .....                                                               | 63 |
| Subgroup and sensitivity analyses.....                                                                                                              | 64 |
| Supplementary Table 31: Sensitivity analysis: using post values instead of change scores for fruit and vegetable intake (g/d) .....                 | 64 |
| Supplementary Table 32: Pairwise meta-analysis of all interventions vs control for fruit and vegetable intake (standardised mean difference).....   | 64 |
| Supplementary Table 33: Sensitivity analysis: using post values instead of change scores for fruit intake (g/d) .....                               | 65 |
| Supplementary Table 34: Pairwise meta-analysis of all interventions vs control for fruit intake (standardised mean difference) .....                | 65 |
| Supplementary Table 35: Sensitivity analysis: using post values instead of change scores for vegetable intake (g/d) .....                           | 66 |
| Supplementary Table 36: Pairwise meta-analysis of all interventions vs control for vegetable intake (standardised mean difference) .....            | 66 |
| Supplementary Table 37: Sensitivity analysis: using post values instead of change scores for fat intake (g/d).....                                  | 67 |
| Supplementary Table 38: Pairwise meta-analysis of all interventions vs control for fat intake (standardised mean difference) .....                  | 67 |
| Supplementary Table 39: Relative ranking of nutrition interventions (SMD sensitivity analysis; P-scores*).....                                      | 68 |
| Supplementary Table 40: Sensitivity analysis excluding high RoB RCTs for BMI .....                                                                  | 69 |
| Supplementary Table 41: Sensitivity analysis excluding high RoB RCTs for fruit and vegetable intake .....                                           | 69 |
| Supplementary Table 42: Sensitivity analysis excluding high RoB RCTs for fruit intake .....                                                         | 69 |
| Supplementary Table 43: Sensitivity analysis excluding high RoB RCTs for vegetable intake.....                                                      | 69 |
| Supplementary Table 44: Subgroup analysis for geographical location for BMI.....                                                                    | 70 |
| Supplementary Table 45: Subgroup analysis for age for BMI.....                                                                                      | 70 |
| Supplementary Table 46: Subgroup analysis for study length for BMI.....                                                                             | 70 |
| Supplementary Table 47: Subgroup analysis for geographical location for fruit and vegetable intake                                                  | 71 |
| Supplementary Table 48: Subgroup analysis for age for fruit and vegetable intake.....                                                               | 71 |
| Supplementary Table 49: Subgroup analysis for study length for fruit and vegetable intake.....                                                      | 71 |
| Supplementary Table 50: Subgroup analysis for geographical location for fruit intake .....                                                          | 72 |

|                                                                                                                                     |    |
|-------------------------------------------------------------------------------------------------------------------------------------|----|
| Supplementary Table 51: Subgroup analysis for age for fruit intake.....                                                             | 72 |
| Supplementary Table 52: Subgroup analysis for study length for fruit intake.....                                                    | 73 |
| Supplementary Table 53: Subgroup analysis for geographical location for vegetable intake .....                                      | 73 |
| Supplementary Table 54: Subgroup analysis for age for vegetable intake .....                                                        | 73 |
| Supplementary Table 55: Subgroup analysis for study length for vegetable intake .....                                               | 74 |
| Supplementary Figure 1a: Network graph BMI.....                                                                                     | 75 |
| Supplementary Figure 1b: Network graph zBMI.....                                                                                    | 75 |
| Supplementary Figure 1c: Network graph body weight change .....                                                                     | 76 |
| Supplementary Figure 1d: Network graph body fat .....                                                                               | 76 |
| Supplementary Figure 1e: Network graph waist circumference .....                                                                    | 77 |
| Supplementary Figure 1f: Network graph fruit and vegetable intake (mean differences) .....                                          | 78 |
| Supplementary Figure 1g: Network graph fruit and vegetable intake (standardised mean differences).....                              | 78 |
| Supplementary Figure 1h: Network graph fruit intake (mean differences).....                                                         | 79 |
| Supplementary Figure 1i: Network graph fruit intake (standardised mean differences).....                                            | 79 |
| Supplementary Figure 1j: Network graph vegetable intake (mean differences) .....                                                    | 80 |
| Supplementary Figure 1k: Network graph vegetable intake (standardised mean differences) .....                                       | 80 |
| Supplementary Figure 1l: Network graph fat intake (mean differences) .....                                                          | 81 |
| Supplementary Figure 1m: Network graph fat intake (standardised mean differences) .....                                             | 81 |
| Supplementary Figure 2: Summary of the risk of bias assessment for the included RCTs.....                                           | 82 |
| Supplementary Figure 3: Forest plot overweight risk (pairwise meta-analysis) .....                                                  | 83 |
| Supplementary Figure 4: Forest plot obesity risk (pairwise meta-analysis) .....                                                     | 83 |
| Supplementary Figure 5a: Forest plot overweight/obesity risk (pairwise meta-analysis).....                                          | 84 |
| Supplementary Figure 5b: Forest plot overweight/obesity risk (pairwise meta-analysis) .....                                         | 84 |
| Supplementary Figure 6: Forest plot BMI.....                                                                                        | 85 |
| Supplementary Figure 7: Forest plot body weight change (kg) .....                                                                   | 85 |
| Supplementary Figure 8: Forest plot body fat (%).....                                                                               | 85 |
| Supplementary Figure 9: Forest plot waist circumference (cm) .....                                                                  | 86 |
| Supplementary Figure 10: Forest plot fat intake (g/d) .....                                                                         | 86 |
| Supplementary Figure 11: SSB intake (pairwise meta-analysis) .....                                                                  | 86 |
| Supplementary Figure 12: Net-heat plot* to assess inconsistency for fruit and vegetable intake (mean difference) .....              | 87 |
| Supplementary Figure 13: Net-heat plot* to assess inconsistency for fruit and vegetable intake (standardised mean difference) ..... | 88 |
| Supplementary Figure 14: Comparison adjusted funnel plot for body mass index.....                                                   | 89 |
| Supplementary Figure 15: Comparison adjusted funnel plot for fruit and vegetable intake .....                                       | 90 |
| Supplementary Figure 16: Comparison adjusted funnel plot for fruit intake.....                                                      | 91 |
| Supplementary Figure 17: Comparison adjusted funnel plot for vegetable intake .....                                                 | 92 |

|                                                                                                      |    |
|------------------------------------------------------------------------------------------------------|----|
| Supplementary Figure 18: Forest plot fruit and vegetable intake (standardised mean difference) ..... | 93 |
| Supplementary Figure 19: Forest plot fruit intake (standardised mean difference) .....               | 93 |
| Supplementary Figure 20: Forest plot vegetable intake (standardised mean difference).....            | 93 |
| Supplementary Figure 21: Forest plot fat intake (standardised mean difference).....                  | 93 |
| Supplemental References .....                                                                        | 94 |

**Supplementary Table 1.** Deviations from the study protocol

| Domain                            | Deviation                                                                                                                                                                                                                                                                                                                                                                                                                                                                                                                                                                                                                                                                           |
|-----------------------------------|-------------------------------------------------------------------------------------------------------------------------------------------------------------------------------------------------------------------------------------------------------------------------------------------------------------------------------------------------------------------------------------------------------------------------------------------------------------------------------------------------------------------------------------------------------------------------------------------------------------------------------------------------------------------------------------|
| Systematic search                 | Reference lists from obtained systematic reviews and retrieved study protocols were additionally screened for further relevant studies.                                                                                                                                                                                                                                                                                                                                                                                                                                                                                                                                             |
| Eligibility criteria              | RCTs that primarily included both overweight and obese children/adolescents without presenting results separately for the two groups were also excluded, unless the proportion of obese children was $\leq 30\%$ of the study population.<br>Interventions consisting of multiple different components (e.g. nutrition and physical activity), were only included if all components other than the nutrition component were available in both the intervention and control group.                                                                                                                                                                                                   |
| Outcomes                          | Weight Z-score was removed as the WHO classification of nutritional conditions in children and adolescents (0-19 years) using weight and height (i.e. weight-for-age Z-score/height-for-age Z-score) does not include reference values or thresholds for obesity or overweight. <sup>1,2</sup>                                                                                                                                                                                                                                                                                                                                                                                      |
| Data extraction                   | The following study characteristics were additionally extracted: study acronym, number and type of clusters, intervention adherence/compliance, validation of outcome assessment instrument.<br>We extracted odds ratios with 95% confidence intervals for dichotomous data and change scores with standard deviations for continuous data. Where available, we extracted change scores from an analysis of the covariance model (ANCOVA), followed by unadjusted change scores, and post-intervention scores.<br>Missing change scores were calculated from pre- and post-intervention using a correlation coefficient according to the formula provided by the Cochrane Handbook. |
| Data synthesis                    | Component NMA for assessing the contributions of individual components of school-based nutrition interventions to their overall effect on a particular outcome could not be performed.                                                                                                                                                                                                                                                                                                                                                                                                                                                                                              |
| Risk of bias assessment           | An additional guidance was used to facilitate and standardise the risk of bias assessment among reviewers.                                                                                                                                                                                                                                                                                                                                                                                                                                                                                                                                                                          |
| Subgroup and sensitivity analyses | Subgroup analyses and sensitivity analyses were performed only when $\geq 10$ RCTs were available.<br>Post-hoc sensitivity analyses were conducted by repeating the analyses with reported SMDs instead of MDs and post scores instead of change scores.                                                                                                                                                                                                                                                                                                                                                                                                                            |
| Dissemination bias                | Dissemination bias and small study effects were assessed for each outcome when at least ten comparisons were available.                                                                                                                                                                                                                                                                                                                                                                                                                                                                                                                                                             |
| GRADE assessment                  | The standard GRADE approach was used to assess the certainty of the evidence for pairwise comparisons for which NMA could not be performed.                                                                                                                                                                                                                                                                                                                                                                                                                                                                                                                                         |
| Reporting of findings             | Findings were interpreted and reported considering both magnitude and certainty of an effect, according to the GRADE guideline on communicating findings of systematic reviews.                                                                                                                                                                                                                                                                                                                                                                                                                                                                                                     |

**Abbreviations:** GRADE=Grading of Recommendations Assessment, Development, and Evaluation; MD=mean difference; NMA=network meta-analysis; RCT=randomised controlled trial; SMD=standardised mean difference;

**Supplementary Table 2.** Definitions of overweight and obesity in school-aged children and adolescents

| Organisation                                     | Definition of childhood overweight and obesity                                                                                                                                                                                                                                                                                                                                        |
|--------------------------------------------------|---------------------------------------------------------------------------------------------------------------------------------------------------------------------------------------------------------------------------------------------------------------------------------------------------------------------------------------------------------------------------------------|
| World Health Organisation                        | <p>Children and adolescents aged 5–19 years (WHO 2007 Growth Reference<sup>1</sup>)</p> <p><b><u>BMI-for-age (zBMI)</u></b></p> <p><b>Overweight:</b> BMI &gt;1 SD above WHO growth standard median (equivalent to BMI 25 kg/m<sup>2</sup> at 19 years)</p> <p><b>Obesity:</b> BMI &gt;2 SDs above WHO growth standard median (equivalent to BMI 30 kg/m<sup>2</sup> at 19 years)</p> |
| Centers for Disease Control and Prevention (CDC) | <p>Children and adolescents aged 2-20 years (CDC 2000 Growth Charts<sup>3</sup>)</p> <p><b><u>Sex- and age-specific BMI percentiles</u></b></p> <p><b>Overweight:</b> BMI ≥ 85<sup>th</sup> to 94<sup>th</sup> percentile</p> <p><b>Obesity:</b> BMI ≥95<sup>th</sup> percentile</p>                                                                                                  |
| International Obesity Task Force (IOTF)          | <p>Children and adolescents aged 2-18 years (IOTF 2000 Reference<sup>4</sup>)</p> <p><b><u>International sex- and age-specific BMI cut-off points</u></b>, linked to the adult BMI cut-off points 25 kg/m<sup>2</sup> (overweight) and 30 kg/m<sup>2</sup> (obesity)</p>                                                                                                              |

**Abbreviations:** BMI=body mass index; SD=standard deviation; WHO=World Health Organisation;



**Supplementary Table 3.** Search strategies for all electronic databases

| <b>Search strategy (02 May 2022): PubMed</b> |                                                                                                                                                                                                                                                                                                                                                                                                                                                                                                |
|----------------------------------------------|------------------------------------------------------------------------------------------------------------------------------------------------------------------------------------------------------------------------------------------------------------------------------------------------------------------------------------------------------------------------------------------------------------------------------------------------------------------------------------------------|
| #1                                           | ("School Health Services"[Mesh] OR "Schools" [Mesh] OR "school*" [tiab] OR "pre-school*" [tiab] OR "pre school*" [tiab] OR "kindergarten*" [tiab])                                                                                                                                                                                                                                                                                                                                             |
| #2                                           | „Health Promotion" [MeSH] OR "Nutrition Policy" [MeSH] OR "Health Education" [MeSH] OR "Pediatric Obesity/prevention and control" [MeSH] OR "Obesity/prevention and control" [MeSH]                                                                                                                                                                                                                                                                                                            |
| #3                                           | #1 AND #2                                                                                                                                                                                                                                                                                                                                                                                                                                                                                      |
| #4                                           | ("nutrition polic*" [tiab] OR "nutrition promotion program*" [tiab] OR "Food Environment Polic*" [tiab] OR "food service intervention*" [tiab] OR "food service modificat*" [tiab] OR "health behaviour intervention*" [tiab] OR "foodservice program*" [tiab] OR "nutrition curricul*" [tiab] OR "nutrition educat*" [tiab] OR "nutrition polic*" [tiab] OR "obesity prevention" [tiab] OR "overweight prevention*" [tiab] OR "adiposity prevention*" [tiab] ) AND ( school* OR kindergarten) |
| #5                                           | "school based nutrition intervention*" [tiab] OR "school food polic*" [tiab] OR "school nutrition practice*" [tiab] OR "School Nutrition Polic*" [tiab] OR "school-based intervention*" [tiab] OR "school feeding program*" [tiab] OR "health-promoting school*" OR "school lunch*" [tiab] OR "cafeteria-based intervention*" [tiab] OR "school food service change*" [tiab]                                                                                                                   |
| #6                                           | #4 OR #5                                                                                                                                                                                                                                                                                                                                                                                                                                                                                       |
| #7                                           | (health* [tiab] AND (promot* [tiab] OR "policy" [tiab] OR "policies" [tiab] OR educat* [tiab] OR environment* [tiab] OR curricul* [tiab] OR intervention* [tiab] ))                                                                                                                                                                                                                                                                                                                            |
| #8                                           | (nutr* [tiab] OR diet* [tiab] OR food* [tiab] OR feed* [tiab] OR intake* [tiab] OR consum* [tiab] OR eating [tiab] OR habit* [tiab])                                                                                                                                                                                                                                                                                                                                                           |
| #9                                           | ("Schools" [MeSH] OR "Students" [MeSH] OR school* [tiab] OR preschool* [tiab] OR pre-school* [tiab] OR kindergarten* [tiab])                                                                                                                                                                                                                                                                                                                                                                   |
| #10                                          | #7 AND #8 AND #9                                                                                                                                                                                                                                                                                                                                                                                                                                                                               |
| #11                                          | ("Child Nutrition Sciences" [MeSH] AND ("School Health Services" [MeSH] OR "Schools" [MeSH] OR "school*" [all fields] OR "pre-school*" [tiab] OR "pre school*" [tiab] OR "kindergarten*" [tiab]))                                                                                                                                                                                                                                                                                              |
| #12                                          | #3 OR #6 OR #10 OR #11                                                                                                                                                                                                                                                                                                                                                                                                                                                                         |
| #13                                          | #3 OR #6 OR #10 OR #11 (Filter: Randomized Controlled Trial)                                                                                                                                                                                                                                                                                                                                                                                                                                   |

| <b>Search strategy (02 May 2022): Cochrane Library (CENTRAL)</b> |                                                                                                                                                                                                                                                                                                                                                                                                              |
|------------------------------------------------------------------|--------------------------------------------------------------------------------------------------------------------------------------------------------------------------------------------------------------------------------------------------------------------------------------------------------------------------------------------------------------------------------------------------------------|
| #1                                                               | (school* OR preschool* OR pre-school* OR kindergarten*):ti,ab,kw                                                                                                                                                                                                                                                                                                                                             |
| #2                                                               | MeSH descriptor: [Schools] explode all trees                                                                                                                                                                                                                                                                                                                                                                 |
| #3                                                               | MeSH descriptor: [School Health Services] explode all trees                                                                                                                                                                                                                                                                                                                                                  |
| #4                                                               | #1 OR #2 OR #3                                                                                                                                                                                                                                                                                                                                                                                               |
| #5                                                               | MeSH descriptor: [Health Promotion] explode all trees                                                                                                                                                                                                                                                                                                                                                        |
| #6                                                               | MeSH descriptor: [Nutrition Policy] explode all trees                                                                                                                                                                                                                                                                                                                                                        |
| #7                                                               | MeSH descriptor: [Health Education] this term only                                                                                                                                                                                                                                                                                                                                                           |
| #8                                                               | MeSH descriptor: [Pediatric Obesity] explode all trees and with qualifier(s): [prevention & control - PC]                                                                                                                                                                                                                                                                                                    |
| #9                                                               | MeSH descriptor: [Obesity, Abdominal] explode all trees and with qualifier(s): [prevention & control - PC]                                                                                                                                                                                                                                                                                                   |
| #10                                                              | #5 OR #6 OR #7 OR #8 OR #9                                                                                                                                                                                                                                                                                                                                                                                   |
| #11                                                              | #4 AND #10                                                                                                                                                                                                                                                                                                                                                                                                   |
| #12                                                              | (("nutrition polic*" OR "nutrition promotion program*" OR "Food Environment Polic*" OR "food service intervention*" OR "food service modificat*" OR "Health behaviour intervention*" OR "foodservice program*" OR "nutrition curricul*" OR "nutrition educat*" OR "nutrition polic*" OR "obesity prevention" OR "Overweight prevention*" OR "adiposity prevention*") AND (school* OR kindergarten)):ti,ab,kw |
| #13                                                              | ("School based nutrition intervention*" OR "school food polic*" OR "school nutrition practice*" OR "School Nutrition Polic*" OR "school-based intervention*" OR "school feeding program*" OR "health-promoting school*" OR "school lunch*" OR "cafeteria-based intervention*" OR "school food service change*"):ti,ab,kw                                                                                     |
| #14                                                              | #12 OR #13                                                                                                                                                                                                                                                                                                                                                                                                   |

|     |                                                                                                                                                                                                                                    |
|-----|------------------------------------------------------------------------------------------------------------------------------------------------------------------------------------------------------------------------------------|
| #15 | (health* near/5 (promot* OR "policy" OR "policies" OR educat* OR environment* OR curricular* OR intervention*)):ti,ab,kw near/10 (nutr* OR diet* OR food* OR feed* OR intake* OR consum* OR habit* OR attitud* OR behav*):ti,ab,kw |
| #16 | #15 AND #4                                                                                                                                                                                                                         |
| #17 | MeSH descriptor: [Child Nutrition Sciences] explode all trees                                                                                                                                                                      |
| #18 | #17 AND #4                                                                                                                                                                                                                         |
| #19 | #11 OR #14 OR #18                                                                                                                                                                                                                  |

**Search strategy (02 May 2022): Web of Science Core Collection: Science Citation Index Expanded, 1956 to current.**

|     |                                                                                                                                                                                                                                                                                                                                                                                                                                                                                                                                                                                                                                                                                                                                                                                                                      |
|-----|----------------------------------------------------------------------------------------------------------------------------------------------------------------------------------------------------------------------------------------------------------------------------------------------------------------------------------------------------------------------------------------------------------------------------------------------------------------------------------------------------------------------------------------------------------------------------------------------------------------------------------------------------------------------------------------------------------------------------------------------------------------------------------------------------------------------|
| #1  | TS=(child* or student* or adolescent* or pupil* or teenager* or kid*)                                                                                                                                                                                                                                                                                                                                                                                                                                                                                                                                                                                                                                                                                                                                                |
| #2  | TS=(school* or pre-school* or kindergarten )                                                                                                                                                                                                                                                                                                                                                                                                                                                                                                                                                                                                                                                                                                                                                                         |
| #3  | TS=(health* near/2 (promot* or policy or policies or education* or environment* or curricular* or intervention*))                                                                                                                                                                                                                                                                                                                                                                                                                                                                                                                                                                                                                                                                                                    |
| #4  | TS=(nutr* OR diet* OR food* OR feed* OR intake* OR consum* OR habit* OR attitud* OR behav*)                                                                                                                                                                                                                                                                                                                                                                                                                                                                                                                                                                                                                                                                                                                          |
| #5  | TS=(,School based nutrition intervention*" OR ("nutrition polic*" AND school*) OR "school food polic*" OR "school nutrition practice*" OR "School Nutrition Polic*" OR "nutrition promotion programm*" OR „Food Environment Polic*" OR "school-based intervention*" OR „school feeding program*" OR "health-promoting school*" OR OR "school lunch*" OR "cafeteria-based intervention*" OR "school-based program*" OR "food service intervention*" OR "food service modificat*" OR "school food service change*" OR "environment polic*" OR "Environmental Strateg*" OR "school environment*" OR "foodservice program*" OR "nutrition curriculum*" OR "nutrition educat*" OR "nutrition polic*" OR "Health behaviour intervention*" OR "obesity prevention" OR "overweight prevention*" OR "adiposity prevention*" ) |
| #6  | #2 AND #3 AND #4                                                                                                                                                                                                                                                                                                                                                                                                                                                                                                                                                                                                                                                                                                                                                                                                     |
| #7  | #5 OR #6                                                                                                                                                                                                                                                                                                                                                                                                                                                                                                                                                                                                                                                                                                                                                                                                             |
| #8  | #1 AND #7                                                                                                                                                                                                                                                                                                                                                                                                                                                                                                                                                                                                                                                                                                                                                                                                            |
| #9  | TS=(randomi?ed or randomly)                                                                                                                                                                                                                                                                                                                                                                                                                                                                                                                                                                                                                                                                                                                                                                                          |
| #10 | #8 AND #9                                                                                                                                                                                                                                                                                                                                                                                                                                                                                                                                                                                                                                                                                                                                                                                                            |

**Search strategy (02 May 2022): ERIC via ProQuest (1966-current)**

|                                                                                                                                                                                                                                                                                                                                                                                                                                                                                                                                                                                                                                                                                                                                                                                                                                                                                                                                                                                                                                                                                                                                                                                                                                                                                                                                                                                                                                                                                                                                                                                                                                                                                                                                                                                                                                                                                                                                                                                                                                                                                                                                                                                                                                                                                                                                                                                                                                                                                                                                                                                                                                                                                                                                                                                                                                                                                                                                                                                                                                          |  |
|------------------------------------------------------------------------------------------------------------------------------------------------------------------------------------------------------------------------------------------------------------------------------------------------------------------------------------------------------------------------------------------------------------------------------------------------------------------------------------------------------------------------------------------------------------------------------------------------------------------------------------------------------------------------------------------------------------------------------------------------------------------------------------------------------------------------------------------------------------------------------------------------------------------------------------------------------------------------------------------------------------------------------------------------------------------------------------------------------------------------------------------------------------------------------------------------------------------------------------------------------------------------------------------------------------------------------------------------------------------------------------------------------------------------------------------------------------------------------------------------------------------------------------------------------------------------------------------------------------------------------------------------------------------------------------------------------------------------------------------------------------------------------------------------------------------------------------------------------------------------------------------------------------------------------------------------------------------------------------------------------------------------------------------------------------------------------------------------------------------------------------------------------------------------------------------------------------------------------------------------------------------------------------------------------------------------------------------------------------------------------------------------------------------------------------------------------------------------------------------------------------------------------------------------------------------------------------------------------------------------------------------------------------------------------------------------------------------------------------------------------------------------------------------------------------------------------------------------------------------------------------------------------------------------------------------------------------------------------------------------------------------------------------------|--|
| <p>((ti(("School based nutrition intervention*" OR ("nutrition policy") AND school*) OR "school food polic*" OR "school nutrition practice*" OR "School Nutrition Polic*" OR "nutrition promotion programm*" OR "Food Environment Polic*" OR "school-based intervention*" OR "school feeding program*" OR "health-promoting school*" OR ("school lunch" OR "school lunches" OR "school lunchroom") OR "cafeteria-based intervention*" OR "school-based program*" OR "food service intervention*" OR "food service modificat*" OR "school food service change*" OR ("environment policies" OR "environment policy") OR ("environmental strategies" OR "environmental strategy") OR ("school environment" OR "school environmental" OR "school environments") OR "foodservice program*" OR "nutrition curriculum*" OR ("nutrition education") OR ("nutrition policy") OR "Health behaviour intervention*" OR "obesity prevention" OR "overweight prevention*" OR "adiposity prevention*")) OR ab(("School based nutrition intervention*" OR ("nutrition policy") AND school*) OR "school food polic*" OR "school nutrition practice*" OR "School Nutrition Polic*" OR "nutrition promotion programm*" OR "Food Environment Polic*" OR "school-based intervention*" OR "school feeding program*" OR "health-promoting school*" OR ("school lunch" OR "school lunches" OR "school lunchroom") OR "cafeteria-based intervention*" OR "school-based program*" OR "food service intervention*" OR "food service modificat*" OR "school food service change*" OR ("environment policies" OR "environment policy") OR ("environmental strategies" OR "environmental strategy") OR ("school environment" OR "school environmental" OR "school environments") OR "foodservice program*" OR "nutrition curriculum*" OR ("nutrition education") OR ("nutrition policy") OR "Health behaviour intervention*" OR "obesity prevention" OR "overweight prevention*" OR "adiposity prevention*")) OR if(("School based nutrition intervention*" OR ("nutrition policy") AND school*) OR "school food polic*" OR "school nutrition practice*" OR "School Nutrition Polic*" OR "nutrition promotion programm*" OR "Food Environment Polic*" OR "school-based intervention*" OR "school feeding program*" OR "health-promoting school*" OR ("school lunch" OR "school lunches" OR "school lunchroom") OR "cafeteria-based intervention*" OR "school-based program*" OR "food service intervention*" OR "food service modificat*" OR "school food service change*" OR ("environment policies" OR "environment policy") OR ("environmental strategies" OR "environmental strategy") OR ("school environment" OR "school environmental" OR "school environments") OR "foodservice program*" OR "nutrition curriculum*" OR "nutrition education" OR ("nutrition education") OR ("nutrition policy") OR "Health behaviour intervention*" OR "obesity prevention" OR "overweight prevention*" OR "adiposity prevention*")))) OR ((ti((school* OR pre-school* OR</p> |  |
|------------------------------------------------------------------------------------------------------------------------------------------------------------------------------------------------------------------------------------------------------------------------------------------------------------------------------------------------------------------------------------------------------------------------------------------------------------------------------------------------------------------------------------------------------------------------------------------------------------------------------------------------------------------------------------------------------------------------------------------------------------------------------------------------------------------------------------------------------------------------------------------------------------------------------------------------------------------------------------------------------------------------------------------------------------------------------------------------------------------------------------------------------------------------------------------------------------------------------------------------------------------------------------------------------------------------------------------------------------------------------------------------------------------------------------------------------------------------------------------------------------------------------------------------------------------------------------------------------------------------------------------------------------------------------------------------------------------------------------------------------------------------------------------------------------------------------------------------------------------------------------------------------------------------------------------------------------------------------------------------------------------------------------------------------------------------------------------------------------------------------------------------------------------------------------------------------------------------------------------------------------------------------------------------------------------------------------------------------------------------------------------------------------------------------------------------------------------------------------------------------------------------------------------------------------------------------------------------------------------------------------------------------------------------------------------------------------------------------------------------------------------------------------------------------------------------------------------------------------------------------------------------------------------------------------------------------------------------------------------------------------------------------------------|--|

kindergarten)) OR ab((school\* OR pre-school\* OR kindergarten)) OR if((school\* OR pre-school\* OR kindergarten))) AND (MAINSUBJECT.EXACT("Lunch Programs") OR MAINSUBJECT.EXACT("Breakfast Programs") OR MAINSUBJECT.EXACT.EXPLODE("School Health Services") OR MAINSUBJECT.EXACT.EXPLODE("Comprehensive School Health Education") OR MAINSUBJECT.EXACT("Eating Habits")) OR ((ti((health\* NEAR/2 (promot\* OR policy OR policies OR education\* OR environment\* OR curricul\* OR intervention\*))) OR ab((health\* NEAR/2 (promot\* OR policy OR policies OR education\* OR environment\* OR curricul\* OR intervention\*))) OR if((health\* NEAR/2 (promot\* OR policy OR policies OR education\* OR environment\* OR curricul\* OR intervention\*)))) AND (ti((nutr\* OR diet\* OR food\* OR feed\* OR intake\* OR consum\* OR habit\* OR attitud\* OR behav\*)) OR ab((nutr\* OR diet\* OR food\* OR feed\* OR intake\* OR consum\* OR habit\* OR attitud\* OR behav\*)) OR if((nutr\* OR diet\* OR food\* OR feed\* OR intake\* OR consum\* OR habit\* OR attitud\* OR behav\*))) AND (ti((school\* OR pre-school\* OR kindergarten)) OR ab((school\* OR pre-school\* OR kindergarten)) OR if((school\* OR pre-school\* OR kindergarten)))) AND (ti((randomi\*ed OR randomly OR RCT)) OR ab((randomi\*ed OR randomly OR RCT)) OR if((randomi\*ed OR randomly OR RCT))) AND stype.exact("Scholarly Journals" OR "Dissertations & Theses" OR "Other Sources")

| Search strategy (02 May 2022): PsycINFO (APA) via EBSCOhost (1984 to current) |                                                                                                                                                                                                                                                                                                                                                                                                                                                                                                                                                                                                                                                                                                                                                                                                   |
|-------------------------------------------------------------------------------|---------------------------------------------------------------------------------------------------------------------------------------------------------------------------------------------------------------------------------------------------------------------------------------------------------------------------------------------------------------------------------------------------------------------------------------------------------------------------------------------------------------------------------------------------------------------------------------------------------------------------------------------------------------------------------------------------------------------------------------------------------------------------------------------------|
| S1                                                                            | DE "School Environment" OR DE "Middle School Students" OR DE "Intermediate School Students" OR DE "Primary School Students" OR DE "School Based Intervention" OR DE "Public School Education"                                                                                                                                                                                                                                                                                                                                                                                                                                                                                                                                                                                                     |
| S2                                                                            | TI (school* OR pre-school OR kindergarten) OR AB (school* OR pre-school OR kindergarten)                                                                                                                                                                                                                                                                                                                                                                                                                                                                                                                                                                                                                                                                                                          |
| S3                                                                            | DE "Health Promotion" OR DE "Preventive Health Services" OR DE "Public Health Campaigns" OR DE "Health Education"                                                                                                                                                                                                                                                                                                                                                                                                                                                                                                                                                                                                                                                                                 |
| S4                                                                            | DE "Nutrition" OR DE "Beverages" OR DE "Diets" OR DE "Food" OR DE "Mealtimes"                                                                                                                                                                                                                                                                                                                                                                                                                                                                                                                                                                                                                                                                                                                     |
| S5                                                                            | (S1 OR S2) AND S3 AND S4                                                                                                                                                                                                                                                                                                                                                                                                                                                                                                                                                                                                                                                                                                                                                                          |
| S6                                                                            | TI ("nutrition polic*" OR "nutrition promotion program*" OR „Food Environment Polic*" OR "food service intervention*" OR "food service modificat*" OR "Health behaviour intervention*" OR "foodservice program*" OR "nutrition curricul*" OR "nutrition educat*" OR "nutrition polic*" OR obes* N3 prevent* OR overweight N3 prevent* OR adipos* N3 prevent* ) AND TI ( school* OR kindergarten) OR AB ("nutrition polic*" OR "nutrition promotion program*" OR "Food Environment Polic*" OR "food service intervention*" OR "food service modificat*" OR "Health behaviour intervention*" OR "foodservice program*" OR "nutrition curricul*" OR "nutrition educat*" OR "nutrition polic*" OR obes* N3 prevent* OR overweight N3 prevent* OR adipos* N3 prevent*) AND AB(school* OR kindergarten) |
| S7                                                                            | TI ("School based nutrition intervention*" OR "school food polic*" OR "school nutrition practice*" OR "School Nutrition Polic*" OR "school-based intervention*" OR "school feeding program*" OR "health-promoting school*" OR "school lunch*" OR "cafeteria-based intervention*" OR "school food service change*") OR AB ("School based nutrition intervention*" OR "school food polic*" OR "school nutrition practice*" OR "School Nutrition Polic*" OR "school-based intervention*" OR "school feeding program*" OR "health-promoting school*" OR "school lunch*" OR "cafeteria-based intervention*" OR "school food service change*")                                                                                                                                                          |
| S8                                                                            | S6 OR S7                                                                                                                                                                                                                                                                                                                                                                                                                                                                                                                                                                                                                                                                                                                                                                                          |
| S9                                                                            | TI (health* AND (promot* OR "policy" OR "policies" OR educat* OR environment* OR curricul* OR intervention* )) OR AB (health* AND (promot* OR "policy" OR "policies" OR educat* OR environment* OR curricul* OR intervention* ))                                                                                                                                                                                                                                                                                                                                                                                                                                                                                                                                                                  |
| S10                                                                           | TI (nutr* OR diet* OR food* OR feed* OR intake* OR consum* OR eating OR habit* ) OR AB (nutr* [tiab] OR diet* [tiab] OR food* [tiab] OR feed* [tiab] OR intake* [tiab] OR consum*[tiab] OR eating [tiab] OR habit* [tiab])                                                                                                                                                                                                                                                                                                                                                                                                                                                                                                                                                                        |
| S11                                                                           | (school* OR kindergarten*)                                                                                                                                                                                                                                                                                                                                                                                                                                                                                                                                                                                                                                                                                                                                                                        |
| S12                                                                           | S9 AND S10 AND S11                                                                                                                                                                                                                                                                                                                                                                                                                                                                                                                                                                                                                                                                                                                                                                                |
| S13                                                                           | S5 OR S8 OR S12                                                                                                                                                                                                                                                                                                                                                                                                                                                                                                                                                                                                                                                                                                                                                                                   |
| S14                                                                           | DE "Randomized Controlled Trials" OR DE "Randomized Clinical Trials" OR DE "Experiment Controls"                                                                                                                                                                                                                                                                                                                                                                                                                                                                                                                                                                                                                                                                                                  |
| S15                                                                           | TI("random* assigned" OR randomi?ed OR randomly) OR AB("random* assigned" OR randomi?ed OR randomly)                                                                                                                                                                                                                                                                                                                                                                                                                                                                                                                                                                                                                                                                                              |
| S16                                                                           | S14 OR S15                                                                                                                                                                                                                                                                                                                                                                                                                                                                                                                                                                                                                                                                                                                                                                                        |
| S17                                                                           | S13 AND S16                                                                                                                                                                                                                                                                                                                                                                                                                                                                                                                                                                                                                                                                                                                                                                                       |

| <b>Search strategy (02 May 2022): CAB Abstracts via OVID 1910 to 2020 (Week 47)</b> |                                                                                                                                                                                                                                                                                                                                                                                                                     |
|-------------------------------------------------------------------------------------|---------------------------------------------------------------------------------------------------------------------------------------------------------------------------------------------------------------------------------------------------------------------------------------------------------------------------------------------------------------------------------------------------------------------|
| 1                                                                                   | school.mp. or exp schools/ or exp high schools/ or exp private schools/ or exp elementary schools/ or exp public schools/                                                                                                                                                                                                                                                                                           |
| 2                                                                                   | ("pre-school*" or "pre school*" or "kindergarten*").ab,hw,id,ti.                                                                                                                                                                                                                                                                                                                                                    |
| 3                                                                                   | 1 or 2                                                                                                                                                                                                                                                                                                                                                                                                              |
| 4                                                                                   | infant foods.sh. or exp nutrition policy/ or Food policy.sh. or infant nutrition.sh. or Nutrition Policy.mp. or Nutrition programmes.sh.                                                                                                                                                                                                                                                                            |
| 5                                                                                   | 3 and 4                                                                                                                                                                                                                                                                                                                                                                                                             |
| 6                                                                                   | ((("nutrition polic*" or "nutrition promotion program*" or "Food Environment Polic*" or "food service intervention*" or "food service modificat*" or "Health behaviour intervention*" or "foodservice program*" or "nutrition curricul*" or "nutrition educat*" or "nutrition polic*" or "obesity prevention" or "Overweight prevention*" or "adiposity prevention*") adj5 (school* or kindergarten*)).ab,hw,id,ti. |
| 7                                                                                   | ("School based nutrition intervention*" or "school food polic*" or "school nutrition practice*" or "School Nutrition Polic*" or "school-based intervention*" or "school feeding program*" or "health-promoting school*" or "school lunch*" or "cafeteria-based intervention*" or "school food service change*").ab,hw,id,ti.                                                                                        |
| 8                                                                                   | 6 or 7                                                                                                                                                                                                                                                                                                                                                                                                              |
| 9                                                                                   | (health* adj5 (promot* or "policy" or "policies" or educat* or environment* or curricul* or intervention*)).ab,hw,id,ti.                                                                                                                                                                                                                                                                                            |
| 10                                                                                  | (nutr* or diet* or food* or feed* or intake* or consum* or eating or habit*).ab,hw,id,ti.                                                                                                                                                                                                                                                                                                                           |
| 11                                                                                  | 3 and 9 and 10                                                                                                                                                                                                                                                                                                                                                                                                      |
| 12                                                                                  | 5 or 8 or 11                                                                                                                                                                                                                                                                                                                                                                                                        |
| 13                                                                                  | exp randomized controlled trial/ or random*.ab,hw,id,ti.                                                                                                                                                                                                                                                                                                                                                            |
| 14                                                                                  | 12 and 13                                                                                                                                                                                                                                                                                                                                                                                                           |

| <b>Search strategy (02 May 2022): Campbell Library via Rowan University Libraries Website/Advanced Search (1984 – current)</b>                                                                                                                                                                                                                                                                                                                                                                                                                                                                                                                                               |  |
|------------------------------------------------------------------------------------------------------------------------------------------------------------------------------------------------------------------------------------------------------------------------------------------------------------------------------------------------------------------------------------------------------------------------------------------------------------------------------------------------------------------------------------------------------------------------------------------------------------------------------------------------------------------------------|--|
| subject contains school OR kindergarten AND Subject contains "nutrition policy" OR "nutrition promotion program" OR "Food Environment Polic" OR "food service intervention" OR "food service modification" OR "foodservice program" OR "nutrition curriculum" OR "nutrition education" OR "obesity prevention" OR "overweight prevention" OR "adiposity prevention" OR "school based nutrition intervention" OR "school food policy" OR "school nutrition practice" OR "School Nutrition Policy" OR "school-based intervention" OR "school feeding program" OR "health-promoting school" OR "school lunch" OR "cafeteria-based intervention" OR "school food service change" |  |
| AND Subject contains "randomized controlled trial" OR "randomised controlled trial" OR RCT                                                                                                                                                                                                                                                                                                                                                                                                                                                                                                                                                                                   |  |

| <b>Search strategy (02 May 2022): BiblioMap EPPI Database of health promotion research via Website – All years</b> |                                                                                                                                                      |
|--------------------------------------------------------------------------------------------------------------------|------------------------------------------------------------------------------------------------------------------------------------------------------|
| 1                                                                                                                  | Characteristics of the study population: children OR young people OR educational institution OR preschool OR education OR environmental modification |
| 2                                                                                                                  | What type of study does this report describe?: RCT                                                                                                   |
| 11                                                                                                                 | Freetext: "School based nutrition intervention*"                                                                                                     |
| 12                                                                                                                 | Freetext: "nutrition promotion program*"                                                                                                             |
| 21                                                                                                                 | Freetext: "school feeding program*"                                                                                                                  |
| 23                                                                                                                 | Freetext: "school lunch*"                                                                                                                            |
| 25                                                                                                                 | Freetext: "cafeteria-based intervention*"                                                                                                            |
| 27                                                                                                                 | Freetext: "food service intervention*"                                                                                                               |
| 30                                                                                                                 | Freetext: "food service modification*"                                                                                                               |
| 32                                                                                                                 | Freetext: "school food service change*"                                                                                                              |
| 34                                                                                                                 | Freetext: "nutrition polic*"                                                                                                                         |
| 39                                                                                                                 | Freetext: "nutrition curricul*" OR "nutrition educat*"                                                                                               |
| 41                                                                                                                 | Freetext: "obesity prevention" OR "Overweight prevention" OR "adiposity prevention"                                                                  |
| 45                                                                                                                 | Freetext: school*                                                                                                                                    |
| 47                                                                                                                 | Freetext: preschool*                                                                                                                                 |

|    |                                                                |
|----|----------------------------------------------------------------|
| 48 | Freertext: kindergarten*                                       |
| 49 | 11 OR 12 OR 21 OR 23 OR 25 OR 27 OR 30 OR 32 OR 34 OR 39 OR 41 |
| 50 | 45 OR 47 OR 48                                                 |
| 51 | 49 AND 50                                                      |
| 52 | 1 AND 49                                                       |
| 53 | 51 OR 52                                                       |
| 54 | 2 AND 53                                                       |

**Search strategy (4 May 2022): Australian Education Index (Informit) via Website/Advanced Search - All years**

[All Fields: school\* OR All Fields: kindergarten\* OR All Fields: preschool\*] AND [All Fields: nutrition\* OR All Fields: diet\* OR All Fields: 'health promotion' OR All Fields: 'obesity prevention' OR All Fields: 'food service' OR All Fields: fruit\* OR All Fields: vegetable\*] AND [All Fields: rct OR All Fields: randomized OR All Fields: randomised OR All Fields: randomly]

**Search strategy (3 December 2020): Joanna Briggs Institute (JBI) Evidence Based Practice Database/Advanced Search\***

(school\* OR kindergarten\*); "nutrition polic\*" OR "nutrition promotion program\*" OR "Food Environment Polic\*" OR "food service intervention\*" OR "food service modification\*" OR "foodservice program\*" OR "nutrition curriculum\*" OR "nutrition education" OR "obesity prevention" OR "Overweight prevention" OR "adiposity prevention" OR "School based nutrition intervention\*" OR "school food polic\*" OR "school nutrition practice\*" OR "School Nutrition Polic\*" OR "school based intervention\*" OR "school feeding program\*" OR "health promoting school\*" OR "school lunch\*" OR "cafeteria based intervention\*" OR "school food service change\*"; random\*

\* Database was not accessible at the time of the update search.

**Search strategy (4 May 2022): Practice based Evidence Nutrition Database/Advanced Search**

|               |                                          |
|---------------|------------------------------------------|
| Search Term   | (school OR kindergarten) AND (nutrition) |
| Resource Type | Research Report/Paper                    |

**Supplementary Table 4.** Additional study information and data received from study authors

| <b>Reference</b>                        | <b>Data received</b>                                                                                                         |
|-----------------------------------------|------------------------------------------------------------------------------------------------------------------------------|
| Alvirde-Garcia et al. 2013 <sup>5</sup> | Additional information on control group intervention                                                                         |
| Bessems et al. 2012 <sup>6</sup>        | Fruit intake data (pre- and post-intervention means and standard deviations, excluding three non-randomised control schools) |
| Bogart et al. 2016 <sup>7</sup>         | Additional information on control group intervention and sensitivity analyses                                                |
| Ghaffari et al. 2019 <sup>8</sup>       | Additional information on randomisation and control group intervention                                                       |
| Keihner et al. 2017 <sup>9</sup>        | Additional information on control group intervention                                                                         |
| Shamah Levy et al. 2012 <sup>10</sup>   | Additional information on control group intervention                                                                         |
| Van den Berg et al. 2020 <sup>11</sup>  | Additional information on study duration                                                                                     |

**Supplementary Table 5.** Additional risk of bias guidance for the included cluster randomised controlled trials

| <b>Risk of Bias domain</b>                | <b>Considerations for judgment</b>                                                                                                                                                                                                                                                                                                                                                                                                                                                                                                                                                                                                                                                                                                              |
|-------------------------------------------|-------------------------------------------------------------------------------------------------------------------------------------------------------------------------------------------------------------------------------------------------------------------------------------------------------------------------------------------------------------------------------------------------------------------------------------------------------------------------------------------------------------------------------------------------------------------------------------------------------------------------------------------------------------------------------------------------------------------------------------------------|
| 1a. Randomization process                 | Unless major differences in baseline characteristics, judge as "low risk"<br>No additional guidance required                                                                                                                                                                                                                                                                                                                                                                                                                                                                                                                                                                                                                                    |
| 1b. Recruitment                           | Did identification/recruitment take place before randomisation?<br>(Informed consent [from parents] acquired before randomisation?)<br>Add appropriate scenario from the Cluster RoB guidance document as a comment                                                                                                                                                                                                                                                                                                                                                                                                                                                                                                                             |
| 2. Deviations from intended interventions | Blinding is likely not possible due to the nature of included interventions. Judge "some concerns" unless explicit arguments are mentioned in the text<br><br>Assess the following three points and judge whether deviations have an impact on the outcome:<br>(1) Additional interventions which were introduced not consistent with trial protocol<br>(2) Failure to implement the protocol interventions as intended<br>(3a) Assessment of adherence (yes/no/no information): non-adherence to their assigned intervention → high risk; if no information → some concerns<br>(3b) What was the degree of adherence? → high risk if large degree of non-adherence                                                                             |
| 3. Missing outcome                        | Cut-off: 20% missing data<br><br>Low risk: <20% + reasons<br><br>Some concerns: <20% without reasons<br>However, if valid imputation techniques mentioned → low RoB<br><br>High risk: > 20%<br>However, if:<br>- valid imputation techniques mentioned → low RoB<br>- no imputation techniques are used, but reasons are mentioned for both groups and are (nearly) equally distributed across groups, we will not assume high RoB                                                                                                                                                                                                                                                                                                              |
| 4. Measurement of the outcome             | Blinding is likely not possible due to the nature of the included interventions. Judge "some concerns" unless explicit arguments are mentioned in the text.<br><br>Low RoB:<br>1a) Add some information regarding dietary assessment method: i.e. validated FFQ or validated 24h dietary recall; at least 2-day dietary records; and did not differ between groups<br><b>AND</b><br>1b) question 4.3a no/probably no<br><br>2a) Add some information regarding anthropometric assessment method: i.e. validated anthropometric assessment method; and did not differ between groups<br><b>AND</b><br>2b) question 4.3a no/probably no<br><br>High RoB: Assessments differ between groups<br><b>Focus on questions 4.1 and 4.2 for judgement</b> |
| 5. Selection of reported results          | Judge "low risk" if protocol is present and no evidence for differences between protocol and report exist.                                                                                                                                                                                                                                                                                                                                                                                                                                                                                                                                                                                                                                      |

**Abbreviations:** FFQ=food frequency questionnaire; RoB=risk of bias;

**Supplementary Table 6.** Study exclusions at full-text assessment

| <b>Reference</b> | <b>Reason for exclusion</b>                                                                  |
|------------------|----------------------------------------------------------------------------------------------|
| 12-120           | Wrong study design                                                                           |
| 5 9 10 121-241   | Wrong comparator                                                                             |
| 242-322          | Wrong intervention                                                                           |
| 323-381          | Wrong outcomes                                                                               |
| 382-412          | Wrong study population                                                                       |
| 413-417          | Wrong study setting                                                                          |
| 418-425          | Wrong study focus                                                                            |
| 139 426-443      | Duplicate                                                                                    |
| 444-524          | Study protocol                                                                               |
| 525-658          | Systematic review                                                                            |
| 659-729          | Conference proceeding, commentary, correction, dissertation, retraction, supplement or other |
| 730-737          | Ongoing study                                                                                |



**Supplementary Table 7.** Study characteristics of the 51 randomised controlled trials included in the current systematic review

| First author, Year                                                                                  | Study length (months)      | Number of schools (n)  | School type(s)     | Sample size (n)                                        | Age (mean; range)                               | BMI (baseline) | Obesity (%)                                        | SES (% low) | Migration background (%) | Outcomes                                                  | Assessment instrument                                                                                            | Included in MA | Adjusted for clustering | Adjusted for prognostic factors | Qualitative findings |
|-----------------------------------------------------------------------------------------------------|----------------------------|------------------------|--------------------|--------------------------------------------------------|-------------------------------------------------|----------------|----------------------------------------------------|-------------|--------------------------|-----------------------------------------------------------|------------------------------------------------------------------------------------------------------------------|----------------|-------------------------|---------------------------------|----------------------|
| Country                                                                                             | Intervention duration (Id) |                        |                    | Female (f in %)                                        |                                                 |                |                                                    |             |                          |                                                           | Validated (yes/no)                                                                                               |                |                         |                                 |                      |
| Project name (acronym)                                                                              | Follow-up (Fu; months)     |                        |                    |                                                        |                                                 |                |                                                    |             |                          |                                                           |                                                                                                                  |                |                         |                                 |                      |
| <b>Nutrition education and literacy (n=17)</b>                                                      |                            |                        |                    |                                                        |                                                 |                |                                                    |             |                          |                                                           |                                                                                                                  |                |                         |                                 |                      |
| <b>Baranowski 2003</b> <sup>738</sup><br>Cullen 2005 <sup>739</sup><br>US<br><i>Squire's Quest!</i> | 1.15<br>Id=1.15<br>Fu=0    | n=26<br>IG=13<br>CG=13 | Elementary schools | n=1,489;<br>IG=740;<br>CG=749<br>f=52.5                | 9.4 yrs (mean)                                  | n.r.           | n.r. (obesity prevalence at baseline not reported) | n.r.        | n.r.                     | FV intake; F intake; V intake                             | Food Intake Recording Software System (simulating a Multiple-pass, 24-hour dietary recall)<br><br>validated: yes | Yes            | Yes                     | Yes                             | -                    |
| <b>Barnes 2021</b> <sup>740</sup><br>Sutherland 2019 <sup>367</sup><br>Australia<br><i>SWAP IT</i>  | 11<br>Id=5-6<br>Fu=1-2     | n=6<br>IG=3<br>CG=3    | Primary schools    | n=330;<br>IG=163;<br>CG=167<br>f=51.8                  | 9-12 yrs (range)                                | n.r.           | 7.9                                                | 79.4        | n.r.                     | Obesity / Overweight risk; BMI; zBMI; Waist circumference | Digital scale, stadiometer, measuring tape<br><br>validated: yes                                                 | Yes            | Yes                     | No                              | -                    |
| <b>Bessem's 2012</b> <sup>6</sup><br>The Netherlands<br><i>Krachtvoer revised</i>                   | 16<br>Id=1.8<br>Fu=6       | n=21<br>IG=13<br>CG=8  | Secondary schools  | n=1,474;<br>IG=1,016;<br>CG=458<br>f=47.7 <sup>§</sup> | 12.9 <sup>§</sup> yrs (mean)                    | n.r.           | n.r. (obesity prevalence at baseline not reported) | n.r.        | n.r.                     | F intake                                                  | Student questionnaire<br><br>validated: no                                                                       | Yes            | No                      | No                              | -                    |
| <b>Domel 1993</b> <sup>741</sup><br>US<br><i>Gimme 5</i>                                            | 3<br>Id=1.4<br>Fu=0.5      | n=2<br>IG=1<br>CG=1    | Elementary schools | n=301;<br>IG=195;<br>CG=106<br>f=51.2                  | n.r. (4 <sup>th</sup> -5 <sup>th</sup> graders) | n.r.           | n.r. (obesity prevalence at baseline not reported) | 57.7        | n.r.                     | FV intake; F intake; V intake                             | Food diaries<br><br>validated: yes                                                                               | Yes            | No                      | No                              | -                    |

|                                                                                                                   |                                         |                            |                    |                                                           |                 |      |                                                       |      |      |                                                    |                                                                                                                                                          |     |    |     |                                                                                                                                                                                                                                                                                                                                                                                                                                          |
|-------------------------------------------------------------------------------------------------------------------|-----------------------------------------|----------------------------|--------------------|-----------------------------------------------------------|-----------------|------|-------------------------------------------------------|------|------|----------------------------------------------------|----------------------------------------------------------------------------------------------------------------------------------------------------------|-----|----|-----|------------------------------------------------------------------------------------------------------------------------------------------------------------------------------------------------------------------------------------------------------------------------------------------------------------------------------------------------------------------------------------------------------------------------------------------|
| <b>Evans 2013</b> <sup>742</sup><br>Kitchen<br>2009 <sup>479</sup><br><br>England/UK<br><br><i>Project Tomato</i> | 20<br><br>Id=10<br><br>Fu=6             | n=54<br><br>IG=27<br>CG=27 | Primary schools    | n=658;<br><br>IG=311;<br>CG=347<br><br>f=50.3             | 7 yrs (mean)    | 16.4 | n.r.<br>(obesity prevalence at baseline not reported) | n.r. | n.r. | FV intake;<br>F intake;<br>V intake;<br>Fat intake | 24h dietary assessment tool, the Child and Diet Evaluation Tool (CADET) diary (24-hour recall)<br><br>validated: yes                                     | Yes | No | Yes | -                                                                                                                                                                                                                                                                                                                                                                                                                                        |
| <b>Fonseca 2019</b> <sup>743</sup><br><br>Brazil                                                                  | 3-4<br><br>Id=0.2-0.5<br><br>Fu=0.2-0.5 | n=7<br><br>IG=4<br>CG=3    | Elementary schools | n=461;<br><br>IG=273;<br>CG=188<br><br>f=47.1             | 14.8 yrs (mean) | n.r. | n.r.<br>(obesity prevalence at baseline not reported) | n.r. | n.r. | F intake;<br>V intake;<br>SSB intake               | National School-Aged Adolescent Health Survey questionnaire (FFQ-like; evaluating regular intake as $\geq 5$ times in past 7 days)<br><br>validated: yes | No  | No | Yes | The IG showed an increased weekly intake of fruits (p=0.642; OR: 1.17; CI: 0.60–2.29) and vegetables (p=0.008; OR: 2.4; 95% CI: 1.26–4.51) as well as a reduced intake of soft drinks (p=0.021; OR: 0.36; 95% CI: 0.15–0.86) as compared to the control group.                                                                                                                                                                           |
| <b>Gold 2017</b> <sup>744</sup><br><br>US<br><br><i>Go Wild With Fruits and Veggies! (GWWFV)</i>                  | 1.6<br><br>Id=1.6<br><br>Fu=0           | n=26<br><br>IG=14<br>CG=12 | Elementary schools | n=662;<br><br>IG1=261;<br>IG2=76;<br>CG=325<br><br>f=51.8 | 8-9 yrs (range) | n.r. | n.r.<br>(obesity prevalence at baseline not reported) | 47.7 | n.r. | F intake;<br>V intake                              | FV food frequency survey<br><br>validated: yes                                                                                                           | No  | No | Yes | Children in the Fresh Fruit and Vegetable Snack Program (FFVSP) + nutrition education (GWWFV)+ taste testing (TT) group consumed more FV (p<.05) compared to the FFVSP+ GWWFV without TT group, along with the control group. Adjustments for baseline intake differences showed that the GWWFV and GWWFV+TT groups had higher FV intakes than the control group. Fruit intake was also greater with GWWFV+TT as compared to GWWFV only. |

|                                                                            |                       |                       |                                |                                          |                                                         |      |                                                    |      |      |                                      |                                                                                                                                        |     |     |     |   |
|----------------------------------------------------------------------------|-----------------------|-----------------------|--------------------------------|------------------------------------------|---------------------------------------------------------|------|----------------------------------------------------|------|------|--------------------------------------|----------------------------------------------------------------------------------------------------------------------------------------|-----|-----|-----|---|
| <b>Kandiah 2002</b> <sup>745</sup><br>US<br><i>n.r.</i>                    | 0.7<br>Id=0.7<br>Fu=0 | n=2<br>IG=1<br>CG=1   | Elementary schools             | n=187;<br>IG=90;<br>CG=97<br>f=n.r.      | 10.4 yrs (mean)                                         | n.r. | n.r. (obesity prevalence at baseline not reported) | n.r. | n.r. | F intake;<br>V intake;<br>Fat intake | 3 days food records<br>validated: yes                                                                                                  | Yes | No  | No  | - |
| <b>Katz 2011</b> <sup>746</sup><br>US<br><i>Nutrition Detectives</i>       | 9<br>Id=4<br>Fu=0     | n=5<br>IG=3<br>CG=2   | Elementary schools             | n=1,148;<br>IG=622;<br>CG=526<br>f=51.3  | 7 yrs: 17.4%;<br>8 yrs: 32.4%;<br>≥9 yrs: 41.7% (range) | 18.4 | n.r. (obesity prevalence at baseline not reported) | n.r. | n.r. | BMI;<br>Fat intake                   | Youth and Adolescent Questionnaire (YAO);<br>Height and weight measures (computerised BMI assessment tool, BMI4KIDz)<br>validated: yes | Yes | No  | No  | - |
| <b>Lehto 2014</b> <sup>747</sup><br>Finland<br><i>PRO GREENS</i>           | 12<br>Id=8<br>Fu=0    | n=19<br>IG=9<br>CG=10 | Primary schools                | n=727;<br>IG=303;<br>CG=424<br>f=49.1    | 11.4 yrs (mean)                                         | n.r. | n.r. (obesity prevalence at baseline not reported) | n.r. | n.r. | F intake;<br>V intake                | Food frequency questionnaire<br>validated: yes                                                                                         | Yes | Yes | Yes | - |
| <b>Martens 2008</b> <sup>748</sup><br>The Netherlands<br><i>Krachtvoer</i> | 3<br>Id=3<br>Fu=0     | n=18<br>IG=10<br>CG=8 | Secondary schools              | n=1,613;<br>IG=879;<br>CG=734<br>f= n.r. | ≤12 y: 32%<br>13 y: 53%<br>≥14 y: 15% (range)           | n.r. | n.r. (obesity prevalence at baseline not reported) | n.r. | <50% | F intake                             | Food frequency questionnaire<br>validated: yes                                                                                         | Yes | No  | No  | - |
| <b>Najimi 2013</b> <sup>749</sup><br>Iran<br><i>n.r.</i>                   | 4<br>Id=0.9<br>Fu=3   | n=4<br>IG=2<br>CG=2   | Elementary schools (male only) | n=130;<br>IG=63;<br>CG=67<br>f=0.0       | n.r. (4 <sup>th</sup> graders)                          | n.r. | n.r. (obesity prevalence at baseline not reported) | n.r. | n.r. | F intake;<br>V intake                | 3-day food record<br>validated: n.r.                                                                                                   | Yes | No  | No  | - |
| <b>Perikkou 2013</b> <sup>750</sup><br>Cyprus<br><i>n.r.</i>               | 21<br>Id=9<br>Fu=12   | n=4<br>IG=2<br>CG=2   | Elementary schools             | n=117;<br>IG=59;<br>CG=58<br>f= 54.7     | 9 yrs (mean)                                            | n.r. | 2.8 <sup>s</sup>                                   | n.r. | 0    | F intake                             | 2-day food record<br>validated: yes                                                                                                    | Yes | No  | No  | - |

|                                      |                                   |                |                               |                               |                                                      |      |                                                       |      |      |                                      |                                                                                               |               |     |     |                                                                                                                                                                                                                                                                                                                                                                        |
|--------------------------------------|-----------------------------------|----------------|-------------------------------|-------------------------------|------------------------------------------------------|------|-------------------------------------------------------|------|------|--------------------------------------|-----------------------------------------------------------------------------------------------|---------------|-----|-----|------------------------------------------------------------------------------------------------------------------------------------------------------------------------------------------------------------------------------------------------------------------------------------------------------------------------------------------------------------------------|
| <b>Smit 2020</b> <sup>751</sup>      | 5                                 | n=6            | Primary and secondary schools | n=398;<br>IG=209;<br>CG=189   | 10.7 <sup>s</sup><br>yrs<br>(mean)                   | n.r. | n.r.<br>(obesity prevalence at baseline not reported) | n.r. | n.r. | SSB intake                           | Averaging children's reported consumption over three days; glasses of ~200ml per day          | No            | Yes | Yes | Children in both the intervention and control group consumed more SSB.                                                                                                                                                                                                                                                                                                 |
| The Netherlands<br><i>MyMovez</i>    | Id=n.r.<br>(1 day?)<br><br>Fu=0.9 | IG=3<br>CG=3   |                               | f=50.8 <sup>s</sup>           |                                                      |      |                                                       |      |      |                                      | validated: no                                                                                 |               |     |     |                                                                                                                                                                                                                                                                                                                                                                        |
| <b>Taghdisi 2016</b> <sup>435</sup>  | 18                                | n=2            | Elementary schools            | n=184;<br>IG=94;<br>CG=90     | n.r.<br>(4 <sup>th</sup> to 6 <sup>th</sup> graders) | n.r. | n.r.<br>(obesity prevalence at baseline not reported) | n.r. | n.r. | FV intake;<br>F intake;<br>V intake  | 24-hour FV recall questionnaire (3 consecutive days, incl. 2 workdays)                        | Yes           | No  | No  | -                                                                                                                                                                                                                                                                                                                                                                      |
| Iran<br><i>n.r.</i>                  | Id=n.r.<br><br>Fu=3               | IG=1<br>CG=1   |                               | f=0.0                         |                                                      |      |                                                       |      |      |                                      | validated: yes                                                                                |               |     |     |                                                                                                                                                                                                                                                                                                                                                                        |
| <b>Vandongen 1995</b> <sup>752</sup> | 11                                | n=10           | Primary schools               | n=344;<br>IG=199.;<br>CG=145  | 10-12<br>yrs<br>(range)                              | 17.8 | 5.5 <sup>l</sup>                                      | n.r. | n.r. | BMI;<br>Body fat;<br>Fat intake      | Specific anthropometric instruments not specified; Self-reported food records from 2 weekdays | Yes           | No  | No  | -                                                                                                                                                                                                                                                                                                                                                                      |
| Australia<br><i>n.r.</i>             | Id=9<br><br>Fu=0                  | IG=5<br>CG=5   |                               | f=50.9                        |                                                      |      |                                                       |      |      |                                      | validated: n.r.                                                                               |               |     |     |                                                                                                                                                                                                                                                                                                                                                                        |
| <b>Viggiano 2015</b> <sup>753</sup>  | 20                                | n=20           | Middle and high schools       | n=1,045;<br>IG=624;<br>CG=421 | 13.2 <sup>f</sup><br>yrs<br>(mean)                   | n.r. | 13.6 <sup>f</sup>                                     | n.r. | n.r. | zBMI;<br>Obesity/<br>Overweight Risk | Anthropometric measurements (weight, height)                                                  | Yes<br>(zBMI) | Yes | Yes | Percentage overweight and obese children in middle schools significantly lower in IG at second post-assessment compared with baseline (34.6 and 9.9% vs 35.3 and 14.2%; p=0.043) but not in CG (33.1 and 12.3% vs 32.6 and 11.5%; p=0.888). Percentage overweight and obese children in high schools significantly lower in IG at second post-assessment compared with |
| Italy<br><i>Kaledo</i>               | Id=4.6<br><br>Fu=13               | IG=10<br>CG=10 |                               | f= 46.9 <sup>v</sup>          |                                                      |      |                                                       |      |      |                                      | validated: yes                                                                                |               |     |     |                                                                                                                                                                                                                                                                                                                                                                        |

|                                                                |             |       |                    |                             |                                                 |      |                                                    |                   |      |                               |                                                                  |     |     |     |   |                                                                                                                                                                                                                                           |
|----------------------------------------------------------------|-------------|-------|--------------------|-----------------------------|-------------------------------------------------|------|----------------------------------------------------|-------------------|------|-------------------------------|------------------------------------------------------------------|-----|-----|-----|---|-------------------------------------------------------------------------------------------------------------------------------------------------------------------------------------------------------------------------------------------|
|                                                                |             |       |                    |                             |                                                 |      |                                                    |                   |      |                               |                                                                  |     |     |     |   | baseline (21.0 and 7.4% vs 34.6 and 12.7%; p=0.003) but not in CG (30.9 and 18.6% vs 32.7 and 18.1%; p=0.951).                                                                                                                            |
| <b>School-based food preparation (n=1)</b>                     |             |       |                    |                             |                                                 |      |                                                    |                   |      |                               |                                                                  |     |     |     |   |                                                                                                                                                                                                                                           |
| <b>Ask 2010</b> <sup>754</sup>                                 | 5           | n=3   | Secondary schools  | n=141; IG=53; CG=88         | n.r. (9 <sup>th</sup> graders)                  | 20.5 | 1 <sup>‡</sup>                                     | n.r.              | n.r. | Body weight change; BMI       | Food frequency questionnaire; Seca R personal scale, stadiometer | Yes | No  | No  | - |                                                                                                                                                                                                                                           |
| Norway                                                         | Id=4        | IG=1  |                    |                             |                                                 |      |                                                    |                   |      |                               |                                                                  |     |     |     |   |                                                                                                                                                                                                                                           |
| <i>n.r.</i>                                                    | Fu=0        | CG=2  |                    | f=46.8                      |                                                 |      |                                                    |                   |      |                               | validated: yes                                                   |     |     |     |   |                                                                                                                                                                                                                                           |
| <b>Social marketing campaigns (n=1)</b>                        |             |       |                    |                             |                                                 |      |                                                    |                   |      |                               |                                                                  |     |     |     |   |                                                                                                                                                                                                                                           |
| <b>Rajbhandari-Thapa 2020</b> <sup>755</sup>                   | n.r. (~7)   | n=8   | Elementary schools | n=3,960; IG=2,111; CG=1,849 | n.r. (1 <sup>st</sup> -5 <sup>th</sup> graders) | n.r. | n.r. (obesity prevalence at baseline not reported) | 65.1 <sup>‡</sup> | n.r. | FV intake                     | Direct lunchroom observations                                    | Yes | Yes | Yes | - |                                                                                                                                                                                                                                           |
| US                                                             | Id=0.33     | IG=4  |                    |                             |                                                 |      |                                                    |                   |      |                               |                                                                  |     |     |     |   |                                                                                                                                                                                                                                           |
| <i>Fun facts nudges</i>                                        | Fu=0        | CG=4  |                    | f=48.1 <sup>‡</sup>         |                                                 |      |                                                    |                   |      |                               | validated: yes                                                   |     |     |     |   |                                                                                                                                                                                                                                           |
| <b>Nutrition-friendly school initiatives (n=7)</b>             |             |       |                    |                             |                                                 |      |                                                    |                   |      |                               |                                                                  |     |     |     |   |                                                                                                                                                                                                                                           |
| <b>Ashfield-Watt 2009</b> <sup>756</sup>                       | 3.9         | n=20  | Primary schools    | n=979; IG=541; CG=438       | 8.8 <sup>‡</sup> yrs (mean)                     | n.r. | n.r. (obesity prevalence at baseline not reported) | n.r.              | n.r. | F intake                      | 24-hour dietary recall ('Day in the Life Questionnaire' [DILQ])  | Yes | Yes | Yes | - |                                                                                                                                                                                                                                           |
| New-Zealand                                                    | Id= 2.3     | IG=10 |                    |                             |                                                 |      |                                                    |                   |      |                               |                                                                  |     |     |     |   |                                                                                                                                                                                                                                           |
| <i>n.r.</i>                                                    | Fu=1.4      | CG=10 |                    | f=50.1 <sup>‡</sup>         |                                                 |      |                                                    |                   |      |                               | validated: yes                                                   |     |     |     |   |                                                                                                                                                                                                                                           |
| <b>Birnbaum 2002</b> <sup>757</sup>                            | 24          | n=16  | Middle schools     | n=2,600; IG=845; CG=1,755   | n.r. (7 <sup>th</sup> graders)                  | n.r. | n.r. (obesity prevalence at baseline not reported) | 15.7              | n.r. | FV intake; F intake; V intake | Student self-report survey (FV component)                        | Yes | Yes | Yes |   | Students receiving the school environment intervention reported a 0.19-serving decrease in F intake and no change in daily V servings intake (p=0.300). CG students reported no change in daily F intake (p=0.742) or V intake (p=0.895). |
| US                                                             | Id=24 (12*) | IG=8  |                    |                             |                                                 |      |                                                    |                   |      |                               |                                                                  |     |     |     |   |                                                                                                                                                                                                                                           |
| <i>Teens Eating for Energy and Nutrition at School (TEENS)</i> | Fu=0        | CG=8  |                    | f=49.0                      |                                                 |      |                                                    |                   |      |                               | validated: yes                                                   |     |     |     |   |                                                                                                                                                                                                                                           |

|                                                                                                      |                       |                        |                               |                                                               |                              |                   |                                                       |        |      |                                                                            |                                                                                                                                                                     |     |     |     |                                                                                                                                                                                                                                                                                                                                                                                                                          |
|------------------------------------------------------------------------------------------------------|-----------------------|------------------------|-------------------------------|---------------------------------------------------------------|------------------------------|-------------------|-------------------------------------------------------|--------|------|----------------------------------------------------------------------------|---------------------------------------------------------------------------------------------------------------------------------------------------------------------|-----|-----|-----|--------------------------------------------------------------------------------------------------------------------------------------------------------------------------------------------------------------------------------------------------------------------------------------------------------------------------------------------------------------------------------------------------------------------------|
| <b>Chellappah 2015</b> <sup>759</sup><br>Australia<br><i>FIST</i>                                    | 1.8<br>Id=1.8<br>Fu=0 | n=4<br>IG=2<br>CG=2    | Primary schools               | n=267;<br>IG=133;<br>CG=134<br>f=48.7 <sup>‡</sup>            | n.r.<br>(year 5-6 student s) | 18.8 <sup>‡</sup> | n.r.<br>(obesity prevalence at baseline not reported) | n.r.   | n.r. | Body weight change; BMI; Body fat; Waist circumference; F intake; V intake | Calibrated scale, height meter, measuring tape, Tanita Body Composition Analyzer; 24-hour recall questionnaire of dietary intake in past week<br><br>validated: yes | Yes | No  | No  | Comparing mean scores between baseline and follow-up, in the IG significant increases were seen in V intake scores, $1.78 \pm 0.42$ to $1.87 \pm 0.34$ (P=0.03), and in F serves score, $5.57 \pm 1.40$ to $5.84 \pm 1.39$ (P=0.03); In the CG, (significant) decreases were seen in V intake scores, $1.91 \pm 0.29$ to $1.88 \pm 0.33$ (P=0.32), and in F serves scores, $5.79 \pm 1.31$ to $5.27 \pm 1.29$ (P <0.001) |
| <b>Cohen 2015</b> <sup>760</sup><br>US<br><i>Modifying Eating and Lifestyles at School (MEALS)</i>   | 10<br>Id=7<br>Fu=0    | n=14<br>IG=8<br>CG=6   | Elementary and middle schools | n=2,638;<br>IG1=379<br>IG2=651<br>IG3=672<br>CG=936<br>f=53.8 | 11.6 yrs (mean)              | n.r.              | n.r.<br>(obesity prevalence at baseline not reported) | 87-95% | n.r. | F intake; V intake<br>SSB intake                                           | Plaste waste (weight of each remaining food was individually recorded [6 days])<br><br>validated: yes                                                               | Yes | Yes | Yes | Within smart café schools (intervention), children had access to SSB (white and sugar-sweetened milk), but there were no significant changes in consumption of SSB.                                                                                                                                                                                                                                                      |
| <b>Marcano-Olivier 2019</b> <sup>761</sup><br>Wales/UK<br><i>n.r.</i>                                | 1<br>Id=0.7<br>Fu=0   | n=4<br>IG=2<br>CG=2    | Primary schools               | n=176;<br>IG=86;<br>CG=90<br>f=50.6                           | n.r.<br>(year 1-6 student s) | n.r.              | n.r.<br>(obesity prevalence at baseline not reported) | n.r.   | n.r. | F intake; V intake                                                         | Digital photography method (estimation of intake from pre- and post-consumption photographs)<br><br>validated: yes                                                  | No  | Yes | Yes | Significant increase in F intake from baseline to follow-up in intervention but not control schools (p=0.001). No changes in V intake in either intervention or control schools.                                                                                                                                                                                                                                         |
| <b>Moore 2008</b> <sup>762</sup><br>Moore 2000 <sup>495</sup><br>Wales and England/UK<br><i>n.r.</i> | 12<br>Id=12<br>Fu=0   | n=43<br>IG=23<br>CG=20 | Primary schools               | n=1,612;<br>IG=921;<br>CG=691<br>f=51.3 <sup>‡</sup>          | 9-11 yrs (range)             | n.r.              | n.r.<br>(obesity prevalence at baseline not reported) | n.r.   | n.r. | F intake                                                                   | Computerised 24-hour recall questionnaire<br><br>validated: yes                                                                                                     | Yes | No  | No  | -                                                                                                                                                                                                                                                                                                                                                                                                                        |

|                                                                                                    |                      |                        |                    |                                                           |                                                       |      |                                                       |      |      |                                                    |                                                      |     |     |     |                                                                                                                                                                                                                                                                                                                                                                                                                    |
|----------------------------------------------------------------------------------------------------|----------------------|------------------------|--------------------|-----------------------------------------------------------|-------------------------------------------------------|------|-------------------------------------------------------|------|------|----------------------------------------------------|------------------------------------------------------|-----|-----|-----|--------------------------------------------------------------------------------------------------------------------------------------------------------------------------------------------------------------------------------------------------------------------------------------------------------------------------------------------------------------------------------------------------------------------|
| <b>Perry 2004</b> <sup>763*</sup><br>US<br><i>5-A-Day Cafeteria Power Plus</i>                     | 30<br>Id~18<br>Fu=0  | n=26<br>IG=13<br>CG=13 | Elementary schools | n=1,820;<br>IG=n.r.;<br>CG=n.r.<br>f=49.0                 | n.r.<br>(1 <sup>st</sup> and 3 <sup>rd</sup> graders) | n.r. | n.r.<br>(obesity prevalence at baseline not reported) | 21   | n.r. | FV intake;<br>F intake;<br>V intake                | Direct lunchroom observations<br>validated: yes      | No  | Yes | Yes | Significantly higher FV (without potatoes and juice) and F (with and without juice) intakes among IG. Differences between intervention and control conditions ranged from 0.14 to 0.17 increased servings (at lunch) for intervention group. No differences between groups on total F and V servings (with potatoes), juice, or vegetables. Same pattern was observed after adjusting servings for caloric intake. |
| <b>Multicomponent intervention (n=25)</b>                                                          |                      |                        |                    |                                                           |                                                       |      |                                                       |      |      |                                                    |                                                      |     |     |     |                                                                                                                                                                                                                                                                                                                                                                                                                    |
| <b>Anderson 2005</b> <sup>764</sup><br>Scotland/UK<br><i>Bash Street Kids Project</i>              | 10<br>Id=9<br>Fu=0   | n=4<br>IG=2<br>CG=2    | Primary schools    | n=129;<br>IG=64;<br>CG=65<br>f=54.3                       | 8.5 yrs (mean)                                        | n.r. | n.r.<br>(obesity prevalence at baseline not reported) | 30.4 | n.r. | FV intake;<br>F intake;<br>V intake;<br>Fat intake | 3-day food diaries<br>validated: n.r.                | Yes | No  | No  | -                                                                                                                                                                                                                                                                                                                                                                                                                  |
| <b>Baranowski 2000</b> <sup>765</sup><br>US<br><i>Gimme 5</i>                                      | 36<br>Id=2.8<br>Fu=0 | n=16<br>IG=8<br>CG=8   | Elementary schools | n=3,347 <sup>u</sup> ;<br>IG=1,673;<br>CG=1,674<br>f=n.r. | n.r.<br>(4 <sup>th</sup> and 5 <sup>th</sup> graders) | n.r. | n.r.<br>(obesity prevalence at baseline not reported) | n.r. | n.r. | FV intake;<br>F intake;<br>V intake                | 7-day food record<br>validated: yes                  | Yes | Yes | Yes | -                                                                                                                                                                                                                                                                                                                                                                                                                  |
| <b>Bere 2006a</b> <sup>766</sup><br>Ovrebo 2019 <sup>767</sup><br>Norway (Telemark)<br><i>FVMM</i> | 21<br>Id=7<br>Fu=12  | n=19<br>IG=9<br>CG=10  | Primary schools    | n=369;<br>IG=190;<br>CG=179<br>f=54.2                     | 11.3 yrs (mean)                                       | n.r. | n.r.<br>(obesity prevalence at baseline not reported) | n.r. | n.r. | FV intake                                          | 24-hour fruit and vegetable recall<br>validated: yes | Yes | Yes | Yes | -                                                                                                                                                                                                                                                                                                                                                                                                                  |

|                                                                                                                                                                   |                                |                           |                    |                                                     |                 |      |                                                    |      |      |                                                                                        |                                                                                                                                       |     |     |     |                                                                                                                                                                                                                                                                                                                                                                                                                                                    |
|-------------------------------------------------------------------------------------------------------------------------------------------------------------------|--------------------------------|---------------------------|--------------------|-----------------------------------------------------|-----------------|------|----------------------------------------------------|------|------|----------------------------------------------------------------------------------------|---------------------------------------------------------------------------------------------------------------------------------------|-----|-----|-----|----------------------------------------------------------------------------------------------------------------------------------------------------------------------------------------------------------------------------------------------------------------------------------------------------------------------------------------------------------------------------------------------------------------------------------------------------|
| <b>Bere 2006b</b> <sup>768</sup><br>Bere 2014 <sup>769</sup><br>Bere 2015 <sup>770</sup><br>Ovrebo 2019 <sup>767</sup><br><br>Norway (Hedmark)<br><br><i>FVMM</i> | 21<br><br>Id=7<br><br>Fu=12    | n=19<br><br>IG=9<br>CG=10 | Primary schools    | n=517;<br><br>IG=286;<br>CG=231<br><br>f=47.6       | 11.3 yrs (mean) | n.r. | n.r. (obesity prevalence at baseline not reported) | n.r. | n.r. | FV intake                                                                              | 24-hour fruit and vegetable recall<br><br>validated: yes                                                                              | Yes | Yes | Yes | -                                                                                                                                                                                                                                                                                                                                                                                                                                                  |
| <b>Bogart 2016</b> <sup>7</sup><br><br>US<br><br><i>Students for Nutrition and Exercise (SNaX)</i>                                                                | 48<br><br>Id=1.15<br><br>Fu=24 | n=10<br><br>IG=5<br>CG=5  | Middle schools     | n=1,368;<br><br>IG=829;<br>CG=539<br><br>f=50.9     | 12.2 yrs (mean) | n.r. | 30.0                                               | 88.9 | n.r. | zBMI                                                                                   | Portable stadiometer<br>Electronic scale (BWB-8005)<br><br>validated: yes                                                             | No  | No  | Yes | Intervention showed no significant effects on BMI percentile for intervention vs control students overall, but did show a significantly different effect on BMI percentile for obese intervention students vs obese control students (b=-2.33 percentiles; SE, 0.83; P=0.005). All sensitivity analyses (e.g., predicting BMI z-score, predicting change scores) showed similar effects for obese students in terms of significance and magnitude. |
| <b>Davis 2021</b> <sup>771</sup><br>Davis 2019 <sup>458</sup><br><br>US<br><br><i>Texas Sprouts</i>                                                               | 36<br><br>Id=9<br><br>Fu=0     | n=16<br><br>IG=8<br>CG=8  | Elementary schools | n=3,135;<br><br>IG=1,412;<br>CG=1,723<br><br>f=52.7 | 9.2 yrs (mean)  | 20.1 | 27.3                                               | 68.3 | n.r. | Body weight change;<br>BMI;<br>zBMI;<br>Body fat;<br>Waist circumference;<br>F intake; | Standardised height, waist, weight, and bio-electrical impedance (Tantia Body Fat Analyzer) measurements; adapted version 2015 School | Yes | Yes | Yes | The intervention did not affect/result in reductions in SSB intake.                                                                                                                                                                                                                                                                                                                                                                                |



|                                                                                                                         |                               |                                    |                                         |                                                                |                                                                |                   |                                                                       |                  |      |                                                                                |                                                                                                                                       |     |     |                                                                                 |                                                                                                                                                                                                                                                                                                                                                                                                        |
|-------------------------------------------------------------------------------------------------------------------------|-------------------------------|------------------------------------|-----------------------------------------|----------------------------------------------------------------|----------------------------------------------------------------|-------------------|-----------------------------------------------------------------------|------------------|------|--------------------------------------------------------------------------------|---------------------------------------------------------------------------------------------------------------------------------------|-----|-----|---------------------------------------------------------------------------------|--------------------------------------------------------------------------------------------------------------------------------------------------------------------------------------------------------------------------------------------------------------------------------------------------------------------------------------------------------------------------------------------------------|
|                                                                                                                         |                               |                                    |                                         |                                                                |                                                                |                   |                                                                       |                  |      | V intake;<br>SSB<br>intake                                                     | Physical Activity<br>and Nutrition<br>(SPAN) dietary<br>screener<br><br>validated: yes                                                |     |     |                                                                                 |                                                                                                                                                                                                                                                                                                                                                                                                        |
| <b>Foster<br/>2008</b> <sup>772</sup><br><br>US<br><br><i>School<br/>Nutrition<br/>Policy<br/>Initiative<br/>(SNPI)</i> | 24<br><br>Id=24<br><br>Fu=0   | n=10<br><br>IG=5<br>CG=5           | Element<br>ary and<br>middle<br>schools | n=844;<br><br>IG=479<br>CG=365<br><br>f=53.4 <sup>y</sup>      | 11.2 <sup>y</sup><br>yrs<br>(mean)                             | 20.9 <sup>y</sup> | 23.8 <sup>y</sup>                                                     | ≥50 <sup>y</sup> | n.r. | Obesity /<br>Overweig<br>ht risk;<br>BMI;<br>zBMI;<br>FV intake;<br>Fat intake | Digital scale and<br>wall-mounted<br>stadiometer;<br>Youth and<br>Adolescent Food<br>Frequency<br>Questionnaire<br><br>validated: yes | Yes | Yes | No<br><br>(only<br>adjusted<br>odds<br>ratio for<br>obesity/<br>overweig<br>ht) | -                                                                                                                                                                                                                                                                                                                                                                                                      |
| <b>Ghaffari<br/>2019</b> <sup>8</sup><br><br>Iran<br><br><i>n.r.</i>                                                    | 6<br><br>Id=1<br><br>Fu=6     | n=4<br><br>IG=2<br>CG=2            | High<br>schools                         | n=308;<br><br>IG=154;<br>CG=154<br><br>f=50.0                  | 13-15y<br>(range)                                              | n.r.              | n.r.<br>(obesity<br>prevalen<br>ce at<br>baseline<br>not<br>reported) | 12.7             | n.r. | FV intake                                                                      | Food frequency<br>questionnaire<br><br>validated: yes                                                                                 | Yes | No  | No                                                                              | -                                                                                                                                                                                                                                                                                                                                                                                                      |
| <b>Greene<br/>2017</b> <sup>773*</sup><br>Thomas<br>2016 <sup>368</sup><br><br>US<br><br><i>Smarter<br/>Lunchrooms</i>  | 2.1<br><br>Id=1.4<br><br>Fu=0 | n=10<br><br>IG=7<br>CG=3           | Middle<br>schools                       | n=n.r.;<br><br>IG1=n.r.;<br>IG2=n.r.;<br>CG=n.r.<br><br>f=n.r. | n.r.<br>(5 <sup>th</sup> to<br>8 <sup>th</sup><br>graders<br>) | n.r.              | n.r.<br>(obesity<br>prevalen<br>ce at<br>baseline<br>not<br>reported) | 69.9             | n.r. | F intake;<br>V intake                                                          | Tray observations<br>(quarter-waste<br>method)<br><br>validated: yes                                                                  | No  | Yes | Yes                                                                             | Average fruit intake<br>increased in fruit<br>intervention schools<br>by 0.10 units or by<br>14% (p<0.001), and<br>decreased in control<br>schools by 0.14<br>units or 16%<br>(p<0.001).<br>Average vegetable<br>intake increased in<br>fruit intervention<br>schools by 51%<br>(p<0.001) from 0.57<br>to 0.86 units, and<br>increased in control<br>schools by 34%<br>(p<0.001) from 0.80<br>to 1.07. |
| <b>He 2009</b> <sup>774</sup><br><br>Canada                                                                             | 4.8<br><br>Id=4.8<br><br>Fu=0 | n=26<br><br>IG1=9<br>IG2=9<br>CG=8 | Element<br>ary<br>schools               | n=695;<br><br>IG1=213;<br>IG2=228;<br>CG=254                   | 11.6 <sup>l</sup><br>yrs<br>(mean)                             | n.r.              | n.r.<br>(obesity<br>prevalen<br>ce at<br>baseline                     | n.r.             | n.r. | FV intake                                                                      | 24-hour fruit and<br>vegetable recall<br>questionnaire<br><br>validated: yes                                                          | Yes | Yes | Yes                                                                             | -                                                                                                                                                                                                                                                                                                                                                                                                      |

|                                                                                                   |                               |                            |                    |                                                        |                                 |                   |                                                    |      |      |                                            |                                                                                                                |     |     |     |                                                                                                                                                                                                                                                                                                                                                                                        |
|---------------------------------------------------------------------------------------------------|-------------------------------|----------------------------|--------------------|--------------------------------------------------------|---------------------------------|-------------------|----------------------------------------------------|------|------|--------------------------------------------|----------------------------------------------------------------------------------------------------------------|-----|-----|-----|----------------------------------------------------------------------------------------------------------------------------------------------------------------------------------------------------------------------------------------------------------------------------------------------------------------------------------------------------------------------------------------|
| <i>Northern Fruit and Vegetable Pilot Programme (NFVPP)</i>                                       |                               |                            |                    | f=54.9 <sup>¶</sup>                                    |                                 |                   | not reported)                                      |      |      |                                            |                                                                                                                |     |     |     |                                                                                                                                                                                                                                                                                                                                                                                        |
| <b>Hoppu 2010b</b> <sup>775</sup><br>Hoppu 2010a <sup>475</sup><br><br>Finland<br><br><i>n.r.</i> | 12<br><br>Id=9<br><br>Fu=0    | n=12<br><br>IG=6<br>CG=6   | Secondary schools  | n=287;<br>IG=147;<br>CG=140<br><br>f=55.4              | 13.8 <sup>¶</sup><br>yrs (mean) | n.r.              | n.r. (obesity prevalence at baseline not reported) | n.r. | n.r. | F intake;<br>V intake;<br>Fat intake       | Dietary interviews, computer-assisted 48-hour dietary recall (random subgroup)<br><br>validated: yes           | Yes | Yes | No  | -                                                                                                                                                                                                                                                                                                                                                                                      |
| <b>LaChausse 2017</b> <sup>776</sup><br><br>US<br><br><i>The Harvest of the Month (HOTM)</i>      | 7<br><br>Id=4<br><br>Fu=3     | n=28<br><br>IG=14<br>CG=14 | Elementary schools | n=275;<br>IG=127;<br>CG=148<br><br>f= 54.3             | 9.8 yrs (mean)                  | n.r.              | n.r. (obesity prevalence at baseline not reported) | n.r. | n.r. | F intake;<br>V intake:<br>SSB intake       | Youth Network Survey (based on the School and Physical Activity Nutrition [SPAN] Survey)<br><br>validated: yes | No  | Yes | Yes | No differences were found comparing the mean post-test scores of fruit consumption (b=0.14, t=0.89, P=0.38) or vegetable consumption (b= -0.17, t= -0.73, P=0.47) between the IG and CG. No differences were found comparing the mean post-test scores between the IG and CG for [...] soda consumption (b=0.14, t=1.33, P=0.19) and sports drink consumption (b=0.03, t=0.23, P=0.82) |
| <b>Lent 2014</b> <sup>777</sup><br><br>US<br><br><i>Healthy Corner Store Initiative</i>           | 31.5<br><br>Id=24<br><br>Fu=0 | n=10<br><br>IG=5<br>CG=5   | Elementary schools | n=511;<br>IG=262;<br>CG=249<br><br>f=56.4 <sup>¶</sup> | 11.0 <sup>¶</sup><br>yrs (mean) | 21.4 <sup>¶</sup> | 27.5 <sup>¶</sup>                                  | n.r. | n.r. | Obesity / Overweight risk;<br>BMI;<br>zBMI | Digital scale (SECA) and portable stadiometer<br><br>validated: yes                                            | Yes | Yes | No  | -                                                                                                                                                                                                                                                                                                                                                                                      |

|                                                                                                                                |                      |                        |                    |                                                    |                                |      |                                                    |      |      |                                                          |                                                                                                                                                       |     |     |     |                                                                                                                                                                                                                                                                                                                                                               |
|--------------------------------------------------------------------------------------------------------------------------------|----------------------|------------------------|--------------------|----------------------------------------------------|--------------------------------|------|----------------------------------------------------|------|------|----------------------------------------------------------|-------------------------------------------------------------------------------------------------------------------------------------------------------|-----|-----|-----|---------------------------------------------------------------------------------------------------------------------------------------------------------------------------------------------------------------------------------------------------------------------------------------------------------------------------------------------------------------|
| <b>Meng 2013</b> <sup>778</sup><br>Li 2010 <sup>487</sup><br>China<br><i>n.r.</i>                                              | 12<br>Id=8.9<br>Fu=0 | n=6<br>IG=3<br>CG=3    | Primary schools    | n=1,075;<br>IG=615;<br>CG=460<br>f=47.3            | 6-13 yrs (range)               | 16.6 | n.r. (obesity prevalence at baseline not reported) | n.r. | n.r. | Obesity & Overweight risk; Body weight change; BMI; zBMI | Freestanding stadiometer (height) and digital scale (body weight)<br>validated: yes                                                                   | Yes | No  | Yes | -                                                                                                                                                                                                                                                                                                                                                             |
| <b>Nicklas 1998</b> <sup>779</sup><br>US<br><i>Gimme 5</i>                                                                     | 36<br>Id=24<br>Fu=12 | n=12<br>IG=6<br>CG=6   | High schools       | n=2,213;<br>IG=1,128;<br>CG=1,085<br>f=56.0        | n.r. (9th graders)             | n.r. | n.r. (obesity prevalence at baseline not reported) | n.r. | n.r. | FV intake                                                | Knowledge, Attitudes, and Practices Questionnaire (FFQ like)<br>validated: n.r.                                                                       | Yes | No  | No  | -                                                                                                                                                                                                                                                                                                                                                             |
| <b>Perry 1998</b> <sup>780*</sup><br>US<br><i>5-a-Day Power Plus</i>                                                           | 10<br>Id=6<br>Fu=2   | n=20<br>IG=10<br>CG=10 | Elementary schools | n=1,750;<br>IG=n.r.;<br>CG=n.r.<br>f=n.r.          | n.r. (4 <sup>th</sup> graders) | n.r. | n.r. (obesity prevalence at baseline not reported) | >60% | n.r. | FV intake; F intake; V intake; Fat intake                | 24-hour recall, direct lunchroom observations<br>validated: yes                                                                                       | No  | Yes | Yes | IG had higher mean total dietary (24-hour recall) intakes of FV (+0.58 servings/day; P=0.14) and F (+0.62 servings/day; P=0.02), but lower intake of V (-0.02 servings/day; P=0.92) and total fat (-1.81; P=0.02) compared to CG.                                                                                                                             |
| <b>Ooi 2021</b> <sup>781</sup><br>Sutherland 2021 <sup>782</sup><br>Ooi 2018 <sup>499</sup><br>Australia<br><i>switchURsip</i> | 6<br>Id~4.6<br>Fu=0  | n=6<br>IG=3<br>CG=3    | Secondary schools  | n=742;<br>IG=400;<br>CG=342<br>f=52.5 <sup>†</sup> | 12-15 yrs (range)              | n.r. | n.r. (obesity prevalence at baseline not reported) | n.r. | n.r. | Obesity & Overweight risk; SSB intake                    | Standardised height and weight measurements; ACAES (Australian Children and Adolescent Eating Survey) food frequency questionnaire;<br>validated: yes | Yes | No  | No  | Year 7 students (this group provided valid height and weight measurements only) with BMI z-scores in the combined overweight and obese category increased by 1.0% in intervention schools, and by 1.2% in control schools between baseline and follow-up, a relative change between groups that was not significant (OR=0.94; CI 0.35, 3.15; imputed p=0.90). |

|                                                                                                                                                      |                      |                        |                                     |                                                       |                                                   |      |                                                    |                   |      |                                               |                                                                                                                             |     |     |                                             |   |
|------------------------------------------------------------------------------------------------------------------------------------------------------|----------------------|------------------------|-------------------------------------|-------------------------------------------------------|---------------------------------------------------|------|----------------------------------------------------|-------------------|------|-----------------------------------------------|-----------------------------------------------------------------------------------------------------------------------------|-----|-----|---------------------------------------------|---|
| <b>Polonsky 2019</b> <sup>783</sup><br>US<br><i>One Healthy Breakfast</i>                                                                            | 68<br>Id=30<br>Fu=0  | n=16<br>IG1=8<br>IG2=8 | Elementary and middle schools (K-8) | n=793;<br>IG=350;<br>CG=443<br>f=51.4 <sup>y</sup>    | 10.8 <sup>y</sup> yrs (mean)                      | n.r. | 21.4 <sup>y</sup>                                  | 78.9 <sup>y</sup> | n.r. | Obesity risk, Obesity & Overweight risk; zBMI | Height and weight measurements (twice) with portable stadiometers and scales using standard protocols<br><br>validated: yes | Yes | Yes | No                                          | - |
| <b>Reynolds 2000</b> <sup>784</sup><br>US<br><i>High 5 (Alabama)</i>                                                                                 | 24<br>Id=12<br>Fu=12 | n=28<br>IG=14<br>CG=14 | Elementary schools                  | n=1,698 <sup>u</sup> ;<br>IG=849;<br>CG=849<br>f=50.0 | 8.7 yrs (mean)                                    | n.r. | n.r. (obesity prevalence at baseline not reported) | n.r.              | n.r. | FV intake; F intake; V intake                 | 24-hour diet recall interviews, cafeteria observations (observing plate waste)<br><br>validated: yes                        | Yes | Yes | No<br>(only for baseline consumption level) | - |
| <b>Scherr 2017</b> <sup>785</sup><br>Taylor 2017 <sup>786</sup><br>Scherr 2014 <sup>505</sup><br>US<br><i>Shaping Healthy Choices Program (SHCP)</i> | 9<br>Id=9<br>Fu=0    | n=4<br>IG=2<br>CG=2    | Elementary schools                  | n=401;<br>IG=229;<br>CG=172<br>f=47.6 <sup>y</sup>    | 9.6 <sup>y</sup> yrs (mean)                       | n.r. | n.r. (obesity prevalence at baseline not reported) | n.r.              | n.r. | zBMI; F intake; V intake                      | Block food frequency questionnaire; Anthropometric measurements (weight, height, waist circumference)<br><br>validated: yes | Yes | Yes | No                                          | - |
| <b>Sevinc 2011</b> <sup>787</sup><br>Turkey<br><i>Get into motion for health</i>                                                                     | 8<br>Id=8<br>Fu=0    | n=4<br>IG=2<br>CG=2    | Primary schools                     | n=4,469;<br>IG=1,815;<br>CG=2,654<br>f=49.4           | n.r. (1 <sup>st</sup> to 7 <sup>th</sup> graders) | 18.4 | n.r. (obesity prevalence at baseline not reported) | 50.8              | n.r. | BMI                                           | Anthropometric measurements (weight and height)<br><br>validated: yes                                                       | Yes | No  | No                                          | - |
| <b>te Velde 2008</b> <sup>788</sup><br>Norway, the                                                                                                   | 21<br>Id=21<br>Fu=0  | n=62<br>IG=32<br>CG=30 | Primary schools                     | n=1,472;<br>IG=798;<br>CG=674                         | 10.8 yrs (mean)                                   | n.r. | n.r. (obesity prevalence at baseline               | n.r.              | n.r. | FV intake; F intake; V intake                 | 24-hour recall questionnaire, food frequency questionnaire                                                                  | Yes | Yes | Yes                                         | - |

|                                                                                                                                        |                                 |                               |                                            |                                                              |                                                       |      |                  |      |      |                                                    |                                                                                                                                                               |     |     |     |                                                                                                                                                                                                                                                                                                                                                                                                                                                                                                                                                                                                                                                            |
|----------------------------------------------------------------------------------------------------------------------------------------|---------------------------------|-------------------------------|--------------------------------------------|--------------------------------------------------------------|-------------------------------------------------------|------|------------------|------|------|----------------------------------------------------|---------------------------------------------------------------------------------------------------------------------------------------------------------------|-----|-----|-----|------------------------------------------------------------------------------------------------------------------------------------------------------------------------------------------------------------------------------------------------------------------------------------------------------------------------------------------------------------------------------------------------------------------------------------------------------------------------------------------------------------------------------------------------------------------------------------------------------------------------------------------------------------|
| Netherlands,<br>Spain<br><br><i>Pro<br/>Children</i>                                                                                   |                                 |                               |                                            | f=52.6                                                       |                                                       |      | not<br>reported) |      |      |                                                    | validated: yes                                                                                                                                                |     |     |     |                                                                                                                                                                                                                                                                                                                                                                                                                                                                                                                                                                                                                                                            |
| <b>van den<br/>Berg 2020</b> <sup>11</sup><br>Evans<br>2016 <sup>465</sup><br><br>US<br><br><i>Texas!Grow!<br/>Eat! Go!<br/>(TGEG)</i> | 18<br><br>Id=6-7<br><br>Fu=n.r. | n=28<br><br>IG=21<br>CG=7     | Element<br>ary<br>schools                  | n=632;<br>IG=347;<br>CG=285<br><br>f=52.2                    | 7-8 yrs:<br>74.1%<br>9-11<br>yrs:<br>25.9%<br>(range) | n.r. | 28.2             | 80.4 | n.r. | V intake                                           | Student survey<br>(food intake<br>questions<br>targeting<br>vegetable<br>consumption<br>were adapted<br>from the School<br>PA and Nutrition<br>(SPAN) Survey) | Yes | Yes | Yes | -                                                                                                                                                                                                                                                                                                                                                                                                                                                                                                                                                                                                                                                          |
| <b>Zota 2016</b> <sup>789</sup><br><br>Greece<br><br><i>DIATROFI</i>                                                                   | ~9<br><br>Id~9<br><br>Fu=0      | n=146<br><br>IG1=73<br>IG2=73 | Primary<br>and<br>seconda<br>ry<br>schools | n=21,261;<br>IG1=10,5<br>61;<br>IG2=10,7<br>00<br><br>f=53.0 | 4-18<br>yrs<br>(range)                                | n.r. | 6.9              | 29.1 | 4.7  | F intake;<br>V intake;<br>Body<br>weight<br>change | Modified, semi-<br>quantitative food<br>frequency<br>questionnaire<br><br>validated: no                                                                       | No  | No  | Yes | Only (statistically)<br>significant increases<br>in IG1 for F intake<br>in children (IG1<br>+5.68%, p=0.002;<br>IG2 +2.18%,<br>p=0.210) and for V<br>intake in both<br>children (IG1<br>+9.59%, p<0.001;<br>IG2<br>+1.59%,p=0.717)<br>and adolescents<br>(IG1 +10.34 %,<br>p=0.014; IG2<br>+2.16%, p=0.363).<br>After adjusting for<br>prognostic factors,<br>children of IG1 had<br>higher odds of<br>increasing F intake<br>(OR 1.22, 95%CI<br>1.02–1.46).<br>Adolescents<br>belonging to<br>IG1 had significantly<br>higher odds of<br>increasing V intake<br>(OR 1.40, 95% CI<br>1.09–1.80). No<br>statistically<br>significant<br>differences between |

|                                |                     |                      |                               |                                             |                  |      |      |      |      |            |                                                                                                                                                                         |     |    |    |                                                                                                                                                                                                                                                                                                                                                                                                                                                                                                                                                                                                                                 |
|--------------------------------|---------------------|----------------------|-------------------------------|---------------------------------------------|------------------|------|------|------|------|------------|-------------------------------------------------------------------------------------------------------------------------------------------------------------------------|-----|----|----|---------------------------------------------------------------------------------------------------------------------------------------------------------------------------------------------------------------------------------------------------------------------------------------------------------------------------------------------------------------------------------------------------------------------------------------------------------------------------------------------------------------------------------------------------------------------------------------------------------------------------------|
|                                |                     |                      |                               |                                             |                  |      |      |      |      |            |                                                                                                                                                                         |     |    |    | IG1 and IG2 in the probability of increasing V intake in children and F intake in adolescents. Percentage IG1 children with BMI change from overweight/obese to normal was 31.4% compared to 22.4% (p=0.013) in IG2. For overweight/obese adolescents, no statistically significant difference between groups (IG1 24.6% vs IG2 27.0%, p=0.716). After prognostic factors adjustment, the odds of improving BMI from overweight/obese to normal for children in IG1 were 61% higher than IG2 (95% CI 1.12–2.31). No difference in probability to improve from overweight/obese to normal in adolescents between the two groups. |
| <b>Zhu 2021</b> <sup>790</sup> | 12<br>Id=12<br>Fu=0 | n=10<br>IG=5<br>CG=5 | Elementary and middle schools | n=2,202<br>IG=1,046 ;<br>CG=1,156<br>f=48.4 | 9-14 yrs (range) | n.r. | n.r. | n.r. | n.r. | SSB intake | SSB frequency questionnaire<br><br>validated: n.r.<br><br>(originated from a former FFQ developed and validated by China Center for Disease and Control and Prevention) | Yes | No | No | -                                                                                                                                                                                                                                                                                                                                                                                                                                                                                                                                                                                                                               |

**Abbreviations:** BMI=body mass index; CADET=the Child and Diet Evaluation Tool; CG=control group; F=fruit; FFQ=fruit frequency questionnaire; FV=fruits and vegetables; Fu=follow-up; IG=intervention group; Id=intervention duration; MA=meta-analysis; n.r.=not reported; SES=socioeconomic status; SSB=sugar-sweetened beverage; V=vegetable; yrs=years; zBMI=body mass index z-score

\***Birnbaum 2002:** Only 7<sup>th</sup> grade intervention was eligible (hence the 12 months intervention duration); **Greene 2017:** Only school consumption and not total consumption was reported (as individual students were not tracked and tray observations could not be referred to individuals); **Perry 1998 & 2004:** Baseline outcome data missing; only between group analyses (i.e. difference between groups at follow-up) was reported; <sup>§</sup>Also considered participants from 3 nonrandomised control schools (i.e. N from 13 IG + 11 CG schools); <sup>§</sup>Also considered an intervention arm that was excluded in our analyses (as ineligible); <sup>¶</sup>Based on number of participants at baseline/number of participants randomised (not on those included in our analyses); <sup>¶</sup>Separate Ns were not available for IG and CG, so the reported total N was split equally between both groups; <sup>¶</sup>Based on number of participants with both baseline and endpoint values (not on those included in our analyses);

Intervention duration = t2-t1

**Supplementary Table 8.** Description of intervention and control group characteristics

| Study                                                           | Intervention group                                                                                                                                                                                                                                                                                                                                                                                                                                             | Control group                                         | Co-interventions | Intervention compliance/adherence                                                                                                                                                                                                                                                                                                                                                                                                                                                                                                                                                                                         |
|-----------------------------------------------------------------|----------------------------------------------------------------------------------------------------------------------------------------------------------------------------------------------------------------------------------------------------------------------------------------------------------------------------------------------------------------------------------------------------------------------------------------------------------------|-------------------------------------------------------|------------------|---------------------------------------------------------------------------------------------------------------------------------------------------------------------------------------------------------------------------------------------------------------------------------------------------------------------------------------------------------------------------------------------------------------------------------------------------------------------------------------------------------------------------------------------------------------------------------------------------------------------------|
| <b>Nutrition education and literacy (n=17)</b>                  |                                                                                                                                                                                                                                                                                                                                                                                                                                                                |                                                       |                  |                                                                                                                                                                                                                                                                                                                                                                                                                                                                                                                                                                                                                           |
| <b>Baranowski 2003</b> <sup>738</sup><br><i>Squire's Quest!</i> | 10 sessions (25min each) over 5 weeks, computer-based educational game aiming to improve skills (nutrition knowledge, food selection, shopping and preparation) and promote FV consumption                                                                                                                                                                                                                                                                     | no intervention                                       | n.r.             | More than 90% students completed ≥8 sessions (out of 10)                                                                                                                                                                                                                                                                                                                                                                                                                                                                                                                                                                  |
| <b>Barnes 2021</b> <sup>740</sup><br><i>SWAP IT</i>             | nutrition education to improve the nutritional quality of children's lunchboxes through: (1) School nutrition guidelines; (2) Lunchbox flipchart lessons; (3) Parent communication and provision of resources on barriers to packing healthy lunchboxes disseminated via a school mobile communication app ('m-health' component)                                                                                                                              | no intervention (usual practice/delayed intervention) | n.r.             | "All principals at intervention schools reported establishing school nutrition guidelines. A large proportion of parents reported downloading the school communication app (89%), approximately half of parents (46%) reported they had heard of the SWAP IT program and 71% recalled receiving the lunchbox messages via the app. App analytics identified the total views of the pushed messages ranged from 387 total views to 1550 views per week over the 10 weeks of messaging (indicating the content may have been viewed more than once by some families), with an average viewing rate of 1025 views per week." |
| <b>Bessems 2012</b> <sup>6</sup><br><i>Krachtvoer revised</i>   | 8 lessons with fixed content and 7 optional activities, include learning activities (e.g. tasting healthy products) and cognition driven activities (e.g. comparing personal dietary intakes with the national recommendations); provision of student work book; take-home bag                                                                                                                                                                                 | usual nutrition education curriculum                  | n.r.             | n.r.                                                                                                                                                                                                                                                                                                                                                                                                                                                                                                                                                                                                                      |
| <b>Domel 1993</b> <sup>741</sup><br><i>Gimme 5</i>              | 18-session curriculum, taught 3x/week for 6 weeks, activities including recipe preparation and taste-testing of FV snacks in the classroom, games, FV Festival; provision of curriculum material and training for teachers (teachers receive four hours of initial training for implementing program, and two hour follow-up training at mid-program); weekly newsletter informed parents of classroom activities, simple FV recipes, tips for serving more FV | no intervention (delayed intervention)                | n.r.             | "Of the ten teachers who taught the program, eight employed all 18 sessions, one employed most (14 to 17), and one employed about half (6 to 13)."                                                                                                                                                                                                                                                                                                                                                                                                                                                                        |
| <b>Evans 2013</b> <sup>742</sup><br><i>Project Tomato</i>       | provision of intervention materials (for activities, 12 lessons, 2 newsletters, advice for parents, three take-home activity bags, and instructions for setting up a committee); customised modules of materials and activities relating to promoting FV consumption                                                                                                                                                                                           | '5-A-Day' Booklet, health eating leaflets for parents | n.r.             | "Implementation of the intervention was low, 21.3% of school items and 56.0% of home items were implemented."                                                                                                                                                                                                                                                                                                                                                                                                                                                                                                             |



|                                                                |                                                                                                                                                                                                                                                                      |                                                        |                                                                                                            |                                                                                                                                             |
|----------------------------------------------------------------|----------------------------------------------------------------------------------------------------------------------------------------------------------------------------------------------------------------------------------------------------------------------|--------------------------------------------------------|------------------------------------------------------------------------------------------------------------|---------------------------------------------------------------------------------------------------------------------------------------------|
| <b>Fonseca 2019</b> <sup>743</sup><br><i>n.r.</i>              | educational sessions (3x45min); covering diet quality, food labelling and healthy eating                                                                                                                                                                             | no intervention                                        | n.r.                                                                                                       | "The same investigator was responsible for delivering all activities in schools in the intervention group, thus ensuring uniform exposure." |
| <b>Gold 2017</b> <sup>744</sup><br><i>GWWFV</i>                | Classroom Nutrition Education curriculum with 7 lessons; including taste testing, classroom nutrition-based activities, take-home challenges, and parent newsletters                                                                                                 | no intervention                                        | <b>IG:</b> Access to federal Fresh Fruit and Vegetable Snack Program (FFVSP)<br><b>CG:</b> Access to FFVSP | n.r.                                                                                                                                        |
| <b>Kandiah 2002</b> <sup>745</sup><br><i>n.r.</i>              | 45min of nutrition education, 4 days/week for 3 weeks; 6 general topics: food guide pyramid, functions and food sources of macronutrients, dietary Guidelines, healthy snacks, vegetarianism; educational tools (e.g. lectures, games, various hands on activities)  | no intervention                                        | n.r.                                                                                                       | n.r.                                                                                                                                        |
| <b>Katz 2011</b> <sup>746</sup><br><i>Nutrition Detectives</i> | 5 lessons (20min each), delivered by physical education instructors; topics: food labels; detecting marketing deceptions, identify and choose healthful foods; written materials for parents; booster training session                                               | no intervention                                        | n.r.                                                                                                       | n.r.                                                                                                                                        |
| <b>Lehto 2014</b> <sup>747</sup><br><i>PRO GREENS</i>          | classroom sessions on taste and recommendations for '5 A Day' combined with an assessment of one's own intake, encouragement to bring a snack of fruits or vegetables to school daily and finally a weekly organised fruit/vegetable bring-a-dish event in the class | no intervention                                        | <b>IG:</b> Free school lunch<br><b>CG:</b> Free school lunch                                               | Lessons (42%), FV snacks (33%), Bring-a-dish breaks (71%), Taste tests (67%), Research, coordinator meeting (79%).                          |
| <b>Martens 2008</b> <sup>748</sup><br><i>Krachtvoer</i>        | 8 nutrition classes (50min each); provision of material; take-home bags with newsletter and food items for parents; taste-testing sessions of various products                                                                                                       | no intervention (usual nutrition education curriculum) | n.r.                                                                                                       | n.r.                                                                                                                                        |
| <b>Najimi 2013</b> <sup>749</sup><br><i>n.r.</i>               | 4 sessions (60min each) for students; 2 sessions (50min each) for teachers and parents                                                                                                                                                                               | no intervention                                        | n.r.                                                                                                       | n.r.                                                                                                                                        |
| <b>Perikkou 2013</b> <sup>750</sup><br><i>n.r.</i>             | 29 lessons classroom-based curriculum (15min each, once a week); designed to provide general information about healthy lifestyle, and build skills for choosing healthful foods                                                                                      | no intervention                                        | n.r.                                                                                                       | n.r.                                                                                                                                        |
| <b>Smit 2020</b> <sup>751</sup><br><i>MyMovez</i>              | 30min classroom presentation about benefits of drinking water – as an alternative for SSB; presentation delivered by research assistant                                                                                                                              | no intervention                                        | n.r.                                                                                                       | n.r.                                                                                                                                        |

|                                                                          |                                                                                                                                                                                                                                                                                                                                                                                                                                |                                        |      |                                                                                                                                                                                                                                                                                                                                                                                                                                                                               |
|--------------------------------------------------------------------------|--------------------------------------------------------------------------------------------------------------------------------------------------------------------------------------------------------------------------------------------------------------------------------------------------------------------------------------------------------------------------------------------------------------------------------|----------------------------------------|------|-------------------------------------------------------------------------------------------------------------------------------------------------------------------------------------------------------------------------------------------------------------------------------------------------------------------------------------------------------------------------------------------------------------------------------------------------------------------------------|
| <b>Taghdisi 2016</b> <sup>435</sup><br><i>n.r.</i>                       | 60min training session for teachers and parents to increase the subjective norms of students about FV; 4 training sessions (45min each) for children on food types/ groups, units of FV consumption and its importance for health; discussions on the barriers of FV consumption; provision of training materials and instruments included slides, food pyramid posters, educational and instructional booklets, and pamphlets | no intervention                        | n.r. | n.r.                                                                                                                                                                                                                                                                                                                                                                                                                                                                          |
| <b>Vandongen 1995</b> <sup>752</sup><br><i>n.r.</i>                      | 10 lessons (60min each) aimed to improve knowledge, attitudes and eating habits. A program guide and other teaching resources including videos were specially prepared for teachers, all of whom attended a single half-day inservice training session                                                                                                                                                                         | no intervention                        | n.r. | n.r.                                                                                                                                                                                                                                                                                                                                                                                                                                                                          |
| <b>Viggiano 2015</b> <sup>753</sup><br><i>Kaledo</i>                     | board game (Kaledo) to promote nutrition education and to improve dietary behavior                                                                                                                                                                                                                                                                                                                                             | no intervention                        | n.r. | n.r.                                                                                                                                                                                                                                                                                                                                                                                                                                                                          |
| <b>School-based food preparation (n=1)</b>                               |                                                                                                                                                                                                                                                                                                                                                                                                                                |                                        |      |                                                                                                                                                                                                                                                                                                                                                                                                                                                                               |
| <b>Ask 2010</b> <sup>754</sup><br><i>n.r.</i>                            | provision of free healthy school lunch; lunch was prepared by the students and eaten in class                                                                                                                                                                                                                                                                                                                                  | no intervention                        | n.r. | "All sixty-four pupils at the intervention school participated in the lunch programme."                                                                                                                                                                                                                                                                                                                                                                                       |
| <b>Social marketing campaigns (n=1)</b>                                  |                                                                                                                                                                                                                                                                                                                                                                                                                                |                                        |      |                                                                                                                                                                                                                                                                                                                                                                                                                                                                               |
| <b>Rajbhandaria-Thapa 2020</b> <sup>755</sup><br><i>Fun facts nudges</i> | placing table tents with fun facts about FV options commonly served in schools' lunchrooms in the center of each lunch table                                                                                                                                                                                                                                                                                                   | no intervention (delayed intervention) | n.r. | n.r.                                                                                                                                                                                                                                                                                                                                                                                                                                                                          |
| <b>Nutrition-friendly school initiatives (n=7)</b>                       |                                                                                                                                                                                                                                                                                                                                                                                                                                |                                        |      |                                                                                                                                                                                                                                                                                                                                                                                                                                                                               |
| <b>Ashfield-Watt 2009</b> <sup>756</sup><br><i>n.r.</i>                  | free fruit provision (at least one piece of fruit per day)                                                                                                                                                                                                                                                                                                                                                                     | no intervention                        | n.r. | n.r.                                                                                                                                                                                                                                                                                                                                                                                                                                                                          |
| <b>Birnbaum 2002</b> <sup>757</sup><br><i>TEENS</i>                      | classroom-based curricula, family newsletters, peer leaders involvement to improve delivery of the curriculum and changes in the school food environment including increasing more healthful options on a la carte and on the school lunch line                                                                                                                                                                                | no intervention (delayed intervention) | n.r. | "Fewer than one-third of the lessons in the seventh-grade year and less than one half of the lessons in the eighth-grade year were implemented. In about two-thirds of the lessons, teachers completed at least some of the activities. Observation of lessons by TEENS evaluation staff suggested higher fidelity, with more than 80% of activities completed in the classrooms. About one-third of families participated to some extent in the behavioral coupon activity." |
| <b>Chellappah 2015</b> <sup>759</sup><br><i>FIST</i>                     | provision of free fruit; washed and prepared by classroom teacher at mid-morning break each day, and participants were encouraged to take a fruit and start eating in class before going out to play                                                                                                                                                                                                                           | no intervention                        | n.r. | n.r.                                                                                                                                                                                                                                                                                                                                                                                                                                                                          |

|                                                                         |                                                                                                                                                                                                                                                                                                                                                             |                                        |      |                                                                                                                                                                                                                                                                          |
|-------------------------------------------------------------------------|-------------------------------------------------------------------------------------------------------------------------------------------------------------------------------------------------------------------------------------------------------------------------------------------------------------------------------------------------------------|----------------------------------------|------|--------------------------------------------------------------------------------------------------------------------------------------------------------------------------------------------------------------------------------------------------------------------------|
| <b>Cohen 2015</b> <sup>760</sup><br><i>MEALS</i>                        | chefs collaborated with the schools 2-3 days/week during the school year to create recipes to improve the palatability of food and to teach the school cafeteria staff culinary skills                                                                                                                                                                      | no intervention                        | n.r. | n.r.                                                                                                                                                                                                                                                                     |
| <b>Marcano-Olivier 2019</b> <sup>761</sup><br><i>n.r.</i>               | school cafeteria modifications (elements: a) FV advertisement, b) attractive naming, c) food labelling, d) attractive serving, and e) prioritising consumption of FV); changes were made to the choice architecture of the school cafeterias.                                                                                                               | no intervention                        | n.r. | n.r.                                                                                                                                                                                                                                                                     |
| <b>Moore 2008</b> <sup>762</sup><br><i>n.r.</i>                         | schools fruit tuck shops were encouraged to offer choice of fruits at prices that would encourage selection of those over unhealthy alternatives                                                                                                                                                                                                            | no intervention                        | n.r. | "82.6% of schools successfully implemented tuck shops."                                                                                                                                                                                                                  |
| <b>Perry 2004</b> <sup>763</sup><br><i>5-A-Day Cafeteria Power Plus</i> | daily activities (increasing the availability, attractiveness, and encouragement for FV) and special events (kick-offs, samplings, challenge weeks, theatre production, and finale meal) to encourage FV consumption; One-day training sessions for all school food service staff and school cook managers and monthly meetings with school cook managers   | no intervention (delayed intervention) | n.r. | "All 26 schools were retained in the study and participated in intervention and evaluation activities as planned [...] All intervention schools conducted the annual kickoffs, monthly samplings, competitions, and finale meals as recorded by our intervention staff." |
| <b>Multicomponent intervention (n=25)</b>                               |                                                                                                                                                                                                                                                                                                                                                             |                                        |      |                                                                                                                                                                                                                                                                          |
| <b>Anderson 2005</b> <sup>764</sup><br><i>Bash Street Kids Project</i>  | (1) increased provision of FV in schools (tuck shops, school lunches); (2) tasting opportunities; (3) range of point-of-purchase marketing (posters and quizzes); newsletters for children and parents; (4) teacher information sessions (delivered in school assemblies, training sessions, classroom presentations); (5) provision of curriculum material | no intervention                        | n.r. | n.r.                                                                                                                                                                                                                                                                     |
| <b>Baranowski 2000</b> <sup>765</sup><br><i>Gimme 5</i>                 | 10 sessions (25 min each), computer-based educational game aiming to improve skills (nutrition knowledge, food selection, shopping and preparation) and promote consumption of fruit, vegetables and fruit juice (via session goal setting)                                                                                                                 | no intervention (usual curriculum)     | n.r. | "Observation of classroom implementation using a comprehensive checklist of activities suggested that 47% of all activities were performed."                                                                                                                             |

|                                                          |                                                                                                                                                                                                                                                                                                                                                                                                                                                                                                                                                                                                               |                                           |      |                                                                                                                                                                                                                                                                                                                                                                                                                                                                                                                                                                                                                                                                                                                                                                                                                               |
|----------------------------------------------------------|---------------------------------------------------------------------------------------------------------------------------------------------------------------------------------------------------------------------------------------------------------------------------------------------------------------------------------------------------------------------------------------------------------------------------------------------------------------------------------------------------------------------------------------------------------------------------------------------------------------|-------------------------------------------|------|-------------------------------------------------------------------------------------------------------------------------------------------------------------------------------------------------------------------------------------------------------------------------------------------------------------------------------------------------------------------------------------------------------------------------------------------------------------------------------------------------------------------------------------------------------------------------------------------------------------------------------------------------------------------------------------------------------------------------------------------------------------------------------------------------------------------------------|
| <b>Bere 2006a</b> <sup>766</sup><br><i>FVMM</i>          | (1) 7 sessions of 3x45 min lessons on FV use and their availability and health benefits; taste testings and food preparations in classrooms; (2) Parental involvement: 6 newsletters with FV/health-related information, recipes and parent-child activities; (3) Participation in the Norwegian School Fruit Programme (EUR 0.30 per child for provision of piece of fruit/carrot each school day)                                                                                                                                                                                                           | Usual practice<br>(paid fruit provision)  | n.r. | "The implementation of the curriculum ranged from 2.5 to 7 (scale 0-7). [...] All six newsletters were reported handed out to the pupils except for one letter in one school. The mean score of the newsletter usage scale was 1.5 [scale -3-6]. [...] Parent meetings were held at five of the nine intervention schools. [...] Of the nine intervention schools, four participated in the School Fruit Programme at both Follow-ups, and of the 10 control schools three participated at Follow-up 1 and five at Follow-up 2.<br>A total of 42 intervention pupils and 26 control pupils subscribed at follow-up 1, and 28 and 46 at Follow-up 2, respectively.<br>Overall, no large differences in the proportions of individual subscribers were found between the intervention group and the control group at follow-up" |
| <b>Bere 2006b</b> <sup>768</sup><br><i>FVMM</i>          | School-based fruit and vegetable intervention consisting of a subscription to the Norwegian School Fruit Programme at no parental cost, and the Fruit and Vegetables Make the Marks (FVMM) educational programme (see Bere 2006a)                                                                                                                                                                                                                                                                                                                                                                             | Usual practice<br>(paid fruit provision)  | n.r. | "The degree of implementation of the FVMM educational programme was similar in the present study as in the parallel study where the FVMM educational programme was the only intervention component (Bere 2006a)."<br>[...] In Year 1, 100% of the intervention pupils participated (for free) in the School Fruit Programme, while 11% of the control pupils subscribed (Table 1). In Year 2, 31% of the pupils in the intervention group and 7% of the control pupils subscribed (Table 1)."                                                                                                                                                                                                                                                                                                                                 |
| <b>Bogart 2016</b> <sup>7</sup><br><i>SNaX</i>           | (1) Environmental: provision of food and water at cafeterias, promotion of healthy lifestyle; (2) Social marketing delivered by peer leaders. (3) Take home activities                                                                                                                                                                                                                                                                                                                                                                                                                                        | no intervention<br>(wait-list control)    | n.r. | n.r.                                                                                                                                                                                                                                                                                                                                                                                                                                                                                                                                                                                                                                                                                                                                                                                                                          |
| <b>Davis 2021</b> <sup>771</sup><br><i>Texas Sprouts</i> | (1) Garden Leadership Committee formation; (2) Outdoor teaching garden; (3) 18 lessons of students Curriculum (60min each), taught by trained educators (4) 9 monthly parent lessons (each 60min)                                                                                                                                                                                                                                                                                                                                                                                                             | no intervention<br>(delayed intervention) | n.r. | "Reach: 96% of students attended each class (curriculum); 7% of parents attended at least one class; Dose: 98.5% of activities taught during students class, 66% taught outside; 100% of activities taught during parents class."                                                                                                                                                                                                                                                                                                                                                                                                                                                                                                                                                                                             |
| <b>Foster 2008</b> <sup>772</sup><br><i>SNPI</i>         | (1) school self-assessment; (2) nutrition education (50 hrs/year; integrated into various classroom subjects); (3) nutrition policy (changes to food sold in schools to meet nutritional standards. Activities such as limiting use of food as a reward, promoting active recess and providing healthy breakfasts); (4) social marketing (for intervention promotion, e.g. raffles and posters with health messages); and (5) parent outreach (intervention promoted to families through home and school association meetings, report card nights, parent education meetings, and weekly nutrition workshops) | no intervention<br>(usual practice)       | n.r. | "With respect to implementation of the intervention, teachers and support staff participated in an average of 10.4 +/-2.9 and 8.4 +/-2.2 hours of training, respectively, during the first and second years of the intervention. Teachers and support staff, respectively, provided an average of 48.0 +/-27.1 and 44.0 +/-18.3 hours of nutrition education during each year of the intervention."                                                                                                                                                                                                                                                                                                                                                                                                                           |

|                                                                   |                                                                                                                                                                                                                                                                                                                                                                                                                                                                                                                                                                                                                                                          |                 |                                                                                                                      |                                                                                                                                                                                                                                                                                                                                                                                                                                                                                                                                                                                                                                                                                                                                                                                                                                                                                                                                                                                                       |
|-------------------------------------------------------------------|----------------------------------------------------------------------------------------------------------------------------------------------------------------------------------------------------------------------------------------------------------------------------------------------------------------------------------------------------------------------------------------------------------------------------------------------------------------------------------------------------------------------------------------------------------------------------------------------------------------------------------------------------------|-----------------|----------------------------------------------------------------------------------------------------------------------|-------------------------------------------------------------------------------------------------------------------------------------------------------------------------------------------------------------------------------------------------------------------------------------------------------------------------------------------------------------------------------------------------------------------------------------------------------------------------------------------------------------------------------------------------------------------------------------------------------------------------------------------------------------------------------------------------------------------------------------------------------------------------------------------------------------------------------------------------------------------------------------------------------------------------------------------------------------------------------------------------------|
| <b>Ghaffari 2019<sup>8</sup></b><br><br><i>n.r.</i>               | (1) Nutrition education: Food and FV classroom lectures; educational PPT slides and pamphlets on FV; school wall newspapers designing, classroom preparation of salads/FV snacks and serving of healthy breakfasts by students; (2) Family: lecturing with focus on parents' role in receiving FV; discussion group with parents; distribution of FV booklets; participation in FV festival; (3) educational session for teachers/school managers; organization and participation in FV festival; (4) FV school posters; morning messages on FV at routine morning meetings of all students and teachers before class; (5) FV provision at school buffet | no intervention | n.r.                                                                                                                 | n.r.                                                                                                                                                                                                                                                                                                                                                                                                                                                                                                                                                                                                                                                                                                                                                                                                                                                                                                                                                                                                  |
| <b>Greene 2017<sup>773</sup></b><br><br><i>Smarter Lunchrooms</i> | (1) Smarter Lunchrooms (Fruit promotion), environmental nudges to encourage students to make healthier food choices. Each intervention component addressed either the convenience (visibility and location) or attractiveness (descriptive names and attractive bowls) of the fruit options in the lunchroom; (2) nutrition education: training for school cafeteria staff, technical support, school visits and training lesson                                                                                                                                                                                                                         | no intervention | n.r.                                                                                                                 | <p>"Total fruit fidelity during the intervention (70 %) was higher than total vegetable fidelity (50 %), with similar compliance among urban and rural schools (75 and 70 %, respectively). Unlike with vegetable variety, both urban and rural schools were in 100 % compliance with fruit variety prior to and during the intervention. Excluding variety, fruit messaging items were implemented with the highest fidelity across all lines and accounted for the largest increases in compliance from baseline.. For both fruit and vegetable treatments, the vast majority of schools failed to add creative fruit or vegetable names to their daily and monthly menus, keeping fidelity scores low.</p> <p>Data from lunchroom audits suggested that the vegetable treatment received a much lower dose of the intervention than the fruit treatment, even when implementation fidelity was high, due to the relative proportion of fruit offered in lunchrooms as compared to vegetables."</p> |
| <b>He 2009<sup>774</sup></b><br><br><i>NFVPP</i>                  | (1) provision of one fruit or one vegetable, 3/week; (2) curriculum 'Paint Your Plate! Create a Masterpiece: Vegetable and Fruit Action Guide for Schools', provision of resources for teachers, nutrition education materials for morning announcements and school newsletter, activities at school and community level to promote FV                                                                                                                                                                                                                                                                                                                   | no intervention | <b>IG:</b> another FV program was already existing in three schools of IG1 and one school of IG2.<br><b>CG:</b> none | n.r.                                                                                                                                                                                                                                                                                                                                                                                                                                                                                                                                                                                                                                                                                                                                                                                                                                                                                                                                                                                                  |

|                                                                           |                                                                                                                                                                                                                                                                                                                                                                                                                                                                                                                                                                                       |                                        |      |                                                                                                                                                                                                                                                                                                                                                                                                                                                                        |
|---------------------------------------------------------------------------|---------------------------------------------------------------------------------------------------------------------------------------------------------------------------------------------------------------------------------------------------------------------------------------------------------------------------------------------------------------------------------------------------------------------------------------------------------------------------------------------------------------------------------------------------------------------------------------|----------------------------------------|------|------------------------------------------------------------------------------------------------------------------------------------------------------------------------------------------------------------------------------------------------------------------------------------------------------------------------------------------------------------------------------------------------------------------------------------------------------------------------|
| <b>Hoppu 2010b</b> <sup>775</sup><br><i>n.r.</i>                          | (1) education: provision of materials for teachers; ready-planned lessons; (2) development of a healthy food environment (quality of snacks at school; changing content of vending machines; actions to increase the appreciation of the school lunch and to encourage the eating of a balanced lunch daily) (3) drama workshops dealing with eating; (4) school meals for teachers and pupils; (5) discussions and informative meetings with school staff; (6) parents: meetings (information, tasting school meal), and provision of magazine dealing with healthy eating delivered | no intervention                        | n.r. | "Overall, the implementation of the intervention was successful and the teaching material was actively used."                                                                                                                                                                                                                                                                                                                                                          |
| <b>LaChausse 2017</b> <sup>776</sup><br><i>HOTM</i>                       | FV tastings; student workbooks; nutritional information presentations, story books related to a monthly FV, farm to-school presentations, newsletters for parents, menu slicks (i.e. place mats); cafeteria posters                                                                                                                                                                                                                                                                                                                                                                   | no intervention                        | n.r. | 94%                                                                                                                                                                                                                                                                                                                                                                                                                                                                    |
| <b>Lent 2014</b> <sup>777</sup><br><i>Healthy Corner Store Initiative</i> | (1) class-based nutrition education on healthy snack identification, energy intake, tracking consumption, goal-setting and label reading; (2) social marketing campaign on healthy eating and well-being; (3) corner store-level initiatives included store owner trainings, adding healthier items, and signage identifying healthy items                                                                                                                                                                                                                                            | no intervention                        | n.r. | n.r.                                                                                                                                                                                                                                                                                                                                                                                                                                                                   |
| <b>Meng 2013</b> <sup>778</sup><br><i>n.r.</i>                            | (1) nutrition education: 6 for students, 2 parents and 4 for teachers and health workers; provision of material (handbook, carton pamphlets); (2) evaluation and improvement of menus for students in school lunch cafeteria                                                                                                                                                                                                                                                                                                                                                          | no intervention                        | n.r. | n.r.                                                                                                                                                                                                                                                                                                                                                                                                                                                                   |
| <b>Nicklas 1998</b> <sup>779</sup><br><i>Gimme 5</i>                      | (1) media-marketing campaign (increase awareness, reinforce concepts, and promote positive attitudes toward FV-consumption); (2) classroom activities (education and skills necessary to increase FV consumption); (3) school meal modification (availability, variety, and taste of FV); (4) parental involvement (healthy education) support                                                                                                                                                                                                                                        | no intervention                        | n.r. | n.r.                                                                                                                                                                                                                                                                                                                                                                                                                                                                   |
| <b>Perry 1998</b> <sup>780</sup><br><i>5-a-Day Power Plus</i>             | (1) behavioural curricula, parental involvement/ education, (2) school food service changes, industry involvement and support                                                                                                                                                                                                                                                                                                                                                                                                                                                         | no intervention (delayed intervention) | n.r. | "Training sessions were attended by 100% of the teachers. Structured staff observations of classes revealed that 78% to 85% of the curriculum activities were implemented as planned. Two thirds of parents returned cards indicating they had participated in at least one of the home team and snack pack lessons each year. Structured lunchroom observations indicated high levels of adherence to the school lunch practices promoted by the Power Plus program." |

|                                                                            |                                                                                                                                                                                                                                                                                                                                                                                                                                                                                                                                                                                                                                                                                                                                                                                                                                                                                                           |                                                              |                                                                                                                                                                                                       |                                                                                                                                                                                                                                                                                                                                                                                                                                                                                                                                                                                                                                                                                                                |
|----------------------------------------------------------------------------|-----------------------------------------------------------------------------------------------------------------------------------------------------------------------------------------------------------------------------------------------------------------------------------------------------------------------------------------------------------------------------------------------------------------------------------------------------------------------------------------------------------------------------------------------------------------------------------------------------------------------------------------------------------------------------------------------------------------------------------------------------------------------------------------------------------------------------------------------------------------------------------------------------------|--------------------------------------------------------------|-------------------------------------------------------------------------------------------------------------------------------------------------------------------------------------------------------|----------------------------------------------------------------------------------------------------------------------------------------------------------------------------------------------------------------------------------------------------------------------------------------------------------------------------------------------------------------------------------------------------------------------------------------------------------------------------------------------------------------------------------------------------------------------------------------------------------------------------------------------------------------------------------------------------------------|
| <p><b>Ooi 2021</b><sup>781</sup><br/><i>switchURsip</i></p>                | <p>(1) Curriculum and teaching: SSB curriculum lessons delivered by teacher; month-long (Peer-led) school challenge; six two-weekly health messages via school's electronic communication channel on reducing SSB intake, healthier drink alternatives, reminders of adverse health effects of excessive SSB consumption, links to relevant resources.<br/>(2) School nutrition environment modification: School guiding principles to supplement school's existing plans; Food outlet (school canteens) changes using principles of choice architecture; installation of water stations on school grounds<br/>(3) Partnerships and services: Six two-weekly health messages for parents, providing advice on SSB intake reduction and availability in home environment, suggestions for healthier drink alternatives and role modelling; newsletter snippets to provide updates on the intervention.</p> | <p>no intervention (usual practice)</p>                      | <p>n.r.</p>                                                                                                                                                                                           | <p>"Process evaluation data found that implementation fidelity varied across the three intervention schools. Full implementation of the multicomponent intervention ranged from 64% to 81% of all intervention components implemented. Components for school guiding principles, pricing and promotion of beverages, water station installation, and newsletter snippets were fully implemented across all intervention schools. Overall, schools seemed to have most difficulties implementing the peer-led school challenge, in addition to disseminating the fortnightly health messages to students and parents."</p>                                                                                      |
| <p><b>Polonsky 2019</b><sup>783</sup><br/><i>One Healthy Breakfast</i></p> | <p>IG1: (1) provision of free breakfast in classroom; (2) 18 lessons of nutrition education (45min each); (3) social marketing (posters, gifts); (4) annual kickoff educational assembly; (5) corner store marketing: shelf talkers encouraging shoppers to make healthy choices were placed at 14 corner stores located less than 0.5 mile from the intervention schools; (6) monthly parents newsletters and family activities<br/><br/>IG2: provision of breakfast before school in cafeteria</p>                                                                                                                                                                                                                                                                                                                                                                                                      | <p>n.a.</p>                                                  | <p><b>IG:</b> SNAP-Ed<br/><b>CG:</b> SNAP-Ed<br/><br/>Nutrition education programming as part of the US Department of Agriculture's Supplemental Nutrition Assistance Program Education (SNAP-Ed)</p> | <p>n.r.</p>                                                                                                                                                                                                                                                                                                                                                                                                                                                                                                                                                                                                                                                                                                    |
| <p><b>Reynolds 2000</b><sup>784</sup><br/><i>High 5</i></p>                | <p>(1) 14 lessons of classroom nutrition curriculum (3 days/wk) including modelling, self-monitoring, problem solving, reinforcement, taste testing, and other methods.<br/>(2) Parents: Kick-Off Night; asked to encourage and support behavior change; 7 parent-child homework assignments with signed vouchers for prize drawings upon completion.<br/>(3) food service managers/ workers received a half-day training on purchasing, preparing and promoting FV that met High 5 guidelines. Each cafeteria was rated monthly basis and rewarded 2, 3 or 4 stars based on completion of 10 intervention activities.</p>                                                                                                                                                                                                                                                                                | <p>no intervention (usual practice/delayed intervention)</p> | <p>n.r.</p>                                                                                                                                                                                           | <p>"Full or partial completion was achieved on 95% of the classroom activities. Forty-three percent of the homework was completed and 56% of children reported eating five or more servings of fruit and vegetables on High 5 days. Ninety-five percent of the Freggie books were received by parents, newsletters were read by 81% and brochures by 86% of parents, and shopping lists were used by 53% of parents. Kick-Off-Night attendance was 24% overall and 60% when held in conjunction with a school open-house. In the cafeteria, a mean of 3.5 servings of fruit and vegetables was offered to students, 3.6 High 5 posters were exhibited, and 4.4 food labels were displayed on High 5 days."</p> |

|                                                                                  |                                                                                                                                                                                                                                                                                                                                                                                                      |                                                                                 |                                                                                                                                                                                                                                                                        |                                                                                                                                                                                                                                                                                                                                                                                                                                                                                                                                                                                                        |
|----------------------------------------------------------------------------------|------------------------------------------------------------------------------------------------------------------------------------------------------------------------------------------------------------------------------------------------------------------------------------------------------------------------------------------------------------------------------------------------------|---------------------------------------------------------------------------------|------------------------------------------------------------------------------------------------------------------------------------------------------------------------------------------------------------------------------------------------------------------------|--------------------------------------------------------------------------------------------------------------------------------------------------------------------------------------------------------------------------------------------------------------------------------------------------------------------------------------------------------------------------------------------------------------------------------------------------------------------------------------------------------------------------------------------------------------------------------------------------------|
| <p><b>Scherr 2017</b><sup>785</sup></p> <p><i>SHCP</i></p>                       | <p>(1) nutrition education and promotion, (2) family and community partnerships, (3) supporting regional agriculture, (4) foods available on the school campus, and (5) school wellness committees and policies.</p>                                                                                                                                                                                 | <p>no intervention (activities unrelated to nutrition, health, and science)</p> | <p>n.r.</p>                                                                                                                                                                                                                                                            | <p>"The ability to implement the intervention differed for each district, with less of the program completed in the Central Valley compared with Northern California (Table 2)<br/>IG in Northern California: - full implementation (100%) of all four components<br/>IG in Central Valley:<br/>- Nutrition: 97% Healthy Choices activities completed, but none (0) of Cooking up Healthy Choices activities<br/>- Parents: 100% of newsletters, one health fair<br/>- Salad bar: Installed, but not used; no improvements in daily produce offerings<br/>- School wellness policies: established"</p> |
| <p><b>Sevinc 2011</b><sup>787</sup></p> <p><i>Get into motion for health</i></p> | <p>(1) education on importance of healthy nutrition and methods of preventing obesity for students, parents, and teachers; (2) distribution of boxed milk to students during meal time. Water, freshly squeezed fruit juice, buttermilk, milk and seasonal fruits were sold to supply healthy eating options for the students in the school canteens</p>                                             | <p>no intervention</p>                                                          | <p>n.r.</p>                                                                                                                                                                                                                                                            | <p>n.r.</p>                                                                                                                                                                                                                                                                                                                                                                                                                                                                                                                                                                                            |
| <p><b>te Velde 2008</b><sup>788</sup></p> <p><i>Pro Children</i></p>             | <p>(1) classroom curriculum with activities (e.g. FV tasting; skills to prepare/ask for them); provision of material;<br/>(2) school environment: provision of FV, (3) family: active parent involvement in the children's homework worksheets; parental newsletters and a parent version of computer-tailored tool to get personalised feedback on their own fruit and vegetable intake levels.</p> | <p>no intervention</p>                                                          | <p>IG: Optional intervention components to encourage community participation: In NL and Norway the local media was used to raise awareness. In Spain, school health services participated and counselled students during their regular health visits.<br/>CG: none</p> | <p>"Although the school curriculum and parental components were more or less similar in the three countries, the level of implementation of these components differed between and within countries [...] Additional analyses, published elsewhere (Wind 2006), showed that degree of implementation was highest in Norway: on average eleven of the sixteen lessons were implemented in Norway in contrast to a mean of 9.4 lessons in Spain and a mean of only 7.4 lessons in the Netherlands."</p>                                                                                                   |
| <p><b>van den Berg 2020</b><sup>11</sup></p> <p><i>TGEG</i></p>                  | <p>(1) school gardening for each participating classroom; (2) 32 lessons of school curriculum; provision of material; at-home-actions with parents</p>                                                                                                                                                                                                                                               | <p>no intervention</p>                                                          | <p>IG: CATCH<br/>CG: CATCH<br/><br/>CATCH (Coordinated Approach To Child Health) is a school-based health program designed to</p>                                                                                                                                      | <p>"Participation rates varied by school with student participation ranging 23.9%–90.2% of third grade students per school, with a mean participation rate of 55.7%. Based on process data collected through interviews with school principals and teachers, differences noted in extent of principal and teachers support can account for the large difference noted in student participation rates."</p>                                                                                                                                                                                             |



|                                                    |                                                                                                                                                                                                                                                                                                                                                                                                                                                                                                                                                                                                                                                                                                                                                                                                                                                                                                                               |                 |                                                                                                                         |                                                                                                                                                                                                                                                                                                                                                                                                                                                                      |
|----------------------------------------------------|-------------------------------------------------------------------------------------------------------------------------------------------------------------------------------------------------------------------------------------------------------------------------------------------------------------------------------------------------------------------------------------------------------------------------------------------------------------------------------------------------------------------------------------------------------------------------------------------------------------------------------------------------------------------------------------------------------------------------------------------------------------------------------------------------------------------------------------------------------------------------------------------------------------------------------|-----------------|-------------------------------------------------------------------------------------------------------------------------|----------------------------------------------------------------------------------------------------------------------------------------------------------------------------------------------------------------------------------------------------------------------------------------------------------------------------------------------------------------------------------------------------------------------------------------------------------------------|
|                                                    |                                                                                                                                                                                                                                                                                                                                                                                                                                                                                                                                                                                                                                                                                                                                                                                                                                                                                                                               |                 | promote physical activity and healthy food choices and prevent tobacco use.                                             |                                                                                                                                                                                                                                                                                                                                                                                                                                                                      |
| <b>Zota 2016</b> <sup>789</sup><br><i>DIATROFI</i> | IG1: (1) provision of free healthy daily meal; (2) healthy nutrition educational program, including provision of educational materials and activities for students, parents and school staff; (3) interactive informational events for parents and for students; cooking events;<br><br>IG2: Provision of free healthy daily meal                                                                                                                                                                                                                                                                                                                                                                                                                                                                                                                                                                                             | n.a.            | n.r.                                                                                                                    | "In view of the actions included in the healthy nutrition educational program, we note that 100% of students and parents in the MI group received the educational/ informational material; all teachers, canteen staff and 42% of parents participated in the informational events that took place in all schools in the MI group; 100% of adolescents participated in additional informational events targeting students that took place in gymnasium and lyceums." |
| <b>Zhu 2021</b> <sup>790</sup><br><i>n.r.</i>      | (1) Individual level: Class meetings twice a year on SSB reduction, and commendation of students with healthy behaviours; distributing SSB-related knowledge materials twice a year; recording own SSB behaviour once a week.<br>(2) Family level: Establishing WeChat (social communication application) groups for parents and publishing new media promotional materials once a month.<br>(3) Peer level: Distributing promotional cards (with cartoon figures and information on six questions concerning SSB-related knowledge of questionnaire, as well as mottos and goals for the new semester) to students twice a year.<br>(4) School level: Conducting blackboard painting activities twice a year, using the theme of "understanding SSBs"; prohibiting the sale of SSBs on campus during the intervention.<br>(5) Community level: Negotiating with stores near schools to refrain from selling SSB to students. | no intervention | <b>IG + CG:</b> All the participating schools followed the city-wide education schedule during the intervention period. | n.r.                                                                                                                                                                                                                                                                                                                                                                                                                                                                 |

**Abbreviations:** CATCH=Coordinated Approach To Child Health; CG=control group; FFVSP=Fresh Fruit and Vegetable Snack Program; FV=fruit and vegetable; IG=intervention group; Id=intervention duration; MA=meta-analysis; MI=multicomponent intervention; n.a.=not applicable; n.r.=not reported; SNAP-Ed=Nutrition education programming as part of the US Department of Agriculture's Supplemental Nutrition Assistance Program Education; SSB=sugar-sweetened beverage;

**Supplementary Table 9.** Reporting of study funding in the 51 included cluster RCTs

| Study                                    | Funding statement                                                                                                                                                                                                                                                                                                                                                                                                                                                                                                                                                                                                                                   |
|------------------------------------------|-----------------------------------------------------------------------------------------------------------------------------------------------------------------------------------------------------------------------------------------------------------------------------------------------------------------------------------------------------------------------------------------------------------------------------------------------------------------------------------------------------------------------------------------------------------------------------------------------------------------------------------------------------|
| <b>Anderson 2005</b> <sup>764</sup>      | "The study was funded by The Food Standards Agency (UK) under its Food Acceptability and Choice R&D Programme."                                                                                                                                                                                                                                                                                                                                                                                                                                                                                                                                     |
| <b>Ashfield-Watt 2009</b> <sup>756</sup> | "The present evaluation study, including the free fruit provision, was funded by the New Zealand Ministry of Health."                                                                                                                                                                                                                                                                                                                                                                                                                                                                                                                               |
| <b>Ask 2010</b> <sup>754</sup>           | "This study was funded through the University of Agder, Kristiansand, Norway. [...] BAMA, TINE BA and Moseid Bakery are acknowledged and thanked for subvention of food."                                                                                                                                                                                                                                                                                                                                                                                                                                                                           |
| <b>Baranowski 2003</b> <sup>738</sup>    | "This research was funded largely by the National Institutes of Health, grant R01 CA-75614. This work is also a publication of the U.S. Department of Agriculture (USDA/ARS) Children's Nutrition Research Center, at Department of Pediatrics, Baylor College of Medicine, Houston, Texas, funded in part by the USDA/ARS (Cooperative Agreement 58-6250-6001)."                                                                                                                                                                                                                                                                                   |
| <b>Baranowski 2000</b> <sup>765</sup>    | Not reported.                                                                                                                                                                                                                                                                                                                                                                                                                                                                                                                                                                                                                                       |
| <b>Barnes 2021</b> <sup>740</sup>        | "The study was supported by Hunter Children's Research Foundation (HCRF); Hunter Medical Research Institute (HMRI); and Hunter New England Population Health. CB is supported by a co-funded industry scholarship between Hunter New England Population Health and University of Newcastle; LW is supported by an NHMRC Career Development Fellowship (APP1128348), Heart Foundation Future Leader Fellowship (101175), and a Hunter New England Clinical Research Fellowship; RS is supported by an NHMRC TRIP Fellowship (APP1150661). None of the funding bodies had a role in the design, data collection, analysis or interpretation of data." |
| <b>Bere 2006a</b> <sup>766</sup>         | "This study was funded by the Norwegian Research Council. The newsletters were developed in collaboration with the Norwegian Cancer Society which also funded this part of the intervention."                                                                                                                                                                                                                                                                                                                                                                                                                                                       |
| <b>Bere 2006b</b> <sup>768</sup>         | "This study was funded by the Norwegian Research Council. Free school fruit for the nine schools was made possible by the Norwegian Fruit and Vegetable Marketing Board through the collective agricultural agreement between Norway's farmers and the agricultural authorities to reduce the price and the administration of the School Fruit Programme."                                                                                                                                                                                                                                                                                          |
| <b>Bessems 2012</b> <sup>6</sup>         | "This work was supported by the Netherlands Organisation for Health Research and Development (ZonMw), grant number 63200011."                                                                                                                                                                                                                                                                                                                                                                                                                                                                                                                       |
| <b>Birnbaum 2002</b> <sup>757</sup>      | "This research was supported by a grant from the National Cancer Institute (5R01 CA71943-03)."                                                                                                                                                                                                                                                                                                                                                                                                                                                                                                                                                      |
| <b>Bogart 2016</b> <sup>7</sup>          | "Supported by the National Institute on Minority Health and Health Disparities (R24 MD001648; Dr Schuster, Principal Investigator). Funded by the National Institutes of Health (NIH)."                                                                                                                                                                                                                                                                                                                                                                                                                                                             |
| <b>Chellappah 2015</b> <sup>759</sup>    | "The authors would like to acknowledge the Manager and Staff from Coles, Port Melbourne store for generously sponsoring fruit for this study."                                                                                                                                                                                                                                                                                                                                                                                                                                                                                                      |
| <b>Cohen 2015</b> <sup>760</sup>         | "This study was funded by a grant from Arbella Insurance. Dr Cohen is supported by grant R25 CA 098566 from the Nutritional Epidemiology of Cancer Education and Career Development Program."                                                                                                                                                                                                                                                                                                                                                                                                                                                       |
| <b>Davis 2021</b> <sup>771</sup>         | "This clinical study was funded by the National Institutes of Health [1R01HL123 865, 2015–2020). Whole Kids Foundation, Home Depot, and Sprouts Healthy Communities Foundation gave funding for garden builds and enhancements."                                                                                                                                                                                                                                                                                                                                                                                                                    |
| <b>Domel 1993</b> <sup>741</sup>         | "This study was made possible by funding from the International Apple Institute."                                                                                                                                                                                                                                                                                                                                                                                                                                                                                                                                                                   |
| <b>Evans 2013</b> <sup>742</sup>         | "This work was supported by the National Prevention Research Initiative of the UK Medical Research Council."                                                                                                                                                                                                                                                                                                                                                                                                                                                                                                                                        |

|                                            |                                                                                                                                                                                                                                                                                                         |
|--------------------------------------------|---------------------------------------------------------------------------------------------------------------------------------------------------------------------------------------------------------------------------------------------------------------------------------------------------------|
| <b>Fonseca 2019</b> <sup>743</sup>         | "Funded studies: NT up to R\$ 30,000.00. Conselho Nacional de Desenvolvimento Científico e Tecnológico Edital <a href="http://www.cnpq.br/">http://www.cnpq.br/</a> . NO."                                                                                                                              |
| <b>Foster 2008</b> <sup>772</sup>          | "This study was supported by grants from the Centers for Disease Control and Prevention (R06/CCR321534-01) and the US Department of Agriculture/Food and Nutrition Service through the Pennsylvania Nutrition Education Program as part of Food Stamp Nutrition Education."                             |
| <b>Ghaffari 2019</b> <sup>8</sup>          | "Financial Support: None."                                                                                                                                                                                                                                                                              |
| <b>Gold 2017</b> <sup>744</sup>            | Not reported.                                                                                                                                                                                                                                                                                           |
| <b>Greene 2017</b> <sup>773</sup>          | "This project was supported by Agriculture and Food Research Initiative Grant no. 2012-68001-19604 from the U.S. Department of Agriculture National Institute of Food and Agriculture, Childhood Obesity Prevention: Integrated Research, Education, and Extension to Prevent Childhood Obesity–A2101." |
| <b>He 2009</b> <sup>774</sup>              | "The Ontario Ministry of Health Promotion (MHP) funded the project. [...] Appreciation is also extended to the Work-Study Programme at Brescia University College for providing salary support to the students who assisted with data entry and verification."                                          |
| <b>Hoppu 2010b</b> <sup>775</sup>          | "The authors thank [...] SITRA (Finnish Innovation Fund) for funding the study."                                                                                                                                                                                                                        |
| <b>Kandiah 2002</b> <sup>745</sup>         | Not reported.                                                                                                                                                                                                                                                                                           |
| <b>Katz 2011</b> <sup>746</sup>            | Not reported.                                                                                                                                                                                                                                                                                           |
| <b>LaChausse 2017</b> <sup>776</sup>       | "This work was supported by a grant from the U.S. Department of Agriculture SNAP-ED program through the California Department of Public Health, Network for a Healthy California [grant number 10-10065]."                                                                                              |
| <b>Lehto 2014</b> <sup>747</sup>           | "The PRO GREENS project has been made possible through financial support from the European Commission's Programme of Community Action in the Field of Public Health 2003–8. [...] The Juho Vainio Foundation provided additional financial support to the Finnish study group."                         |
| <b>Lent 2014</b> <sup>777</sup>            | "Funding agencies: The Robert Wood Johnson Foundation (Healthy Eating Research grant #63052) and NIH (F32DK096756)."                                                                                                                                                                                    |
| <b>Marcano-Olivier 2019</b> <sup>761</sup> | "This is a Knowledge Economy Skills Scholarships (KESS) supported research project, in collaboration with Bangor University."                                                                                                                                                                           |
| <b>Martens 2008</b> <sup>748</sup>         | "This study was financially supported by the Netherlands Organisation for Health and Development (ZonMW) and the Netherlands Heart Foundation."                                                                                                                                                         |
| <b>Meng 2013</b> <sup>778</sup>            | "This project has been funded by China Ministry of Science & Technology as "Key Projects in the National Science & Technology Pillar Program during the Eleventh Five-Year Plan Period", grant number 2008BA158B05."                                                                                    |
| <b>Moore 2008</b> <sup>762</sup>           | "This study was funded by the Food Standards Agency Food Choice Programme. [...] LM is supported by a Career Scientist Award funded by the Welsh Assembly Government."                                                                                                                                  |
| <b>Najimi 2013</b> <sup>749</sup>          | Not reported.                                                                                                                                                                                                                                                                                           |
| <b>Nicklas 1998</b> <sup>779</sup>         | "This research was supported by the National Institutes of Health, National Cancer Institute, CA 59803-01."                                                                                                                                                                                             |
| <b>Ooi 2021</b> <sup>781</sup>             | "Funding was provided by the Ministry of Health's Translational Grant Research Scheme (TRGS)."                                                                                                                                                                                                          |
| <b>Perikkou 2013</b> <sup>750</sup>        | "This study was partially supported by the Department of Nutrition and Dietetics Graduate Program, Harokopio University, Athens, Greece."                                                                                                                                                               |
| <b>Perry 1998</b> <sup>780</sup>           | "Funding for the research reported in this paper was provided by a grant from the National Cancer Institute (ROI CA59805; Donald B. Bishop, principal investigator; Cheryl L. Perry, co-principal investigator)."                                                                                       |

|                                               |                                                                                                                                                                                                                                                                                                                                                                                                                                                                                                                                       |
|-----------------------------------------------|---------------------------------------------------------------------------------------------------------------------------------------------------------------------------------------------------------------------------------------------------------------------------------------------------------------------------------------------------------------------------------------------------------------------------------------------------------------------------------------------------------------------------------------|
| <b>Perry 2004</b> <sup>763</sup>              | "Funding for the research reported in this article was provided by a grant from the National Cancer Institute (R01 CA59805; Donald B. Bishop, principal investigator; Cheryl L. Perry, coprincipal investigator)."                                                                                                                                                                                                                                                                                                                    |
| <b>Polonsky 2019</b> <sup>783</sup>           | "This research was supported by grant AFRI 2012-68001-19616 from the US Department of Agriculture (Dr Foster)."                                                                                                                                                                                                                                                                                                                                                                                                                       |
| <b>Rajbhandaria-Thapa 2020</b> <sup>755</sup> | "The funding was provided through a USDA sub-award from the Cornell Center for Behavioral Economics in Child Nutrition Programs."                                                                                                                                                                                                                                                                                                                                                                                                     |
| <b>Reynolds 2000</b> <sup>784</sup>           | "Funding for this research was provided by National Cancer Institute Grant CA59776."                                                                                                                                                                                                                                                                                                                                                                                                                                                  |
| <b>Scherr 2017</b> <sup>785</sup>             | "Funding for this study was provided by University of California Agriculture and Natural Resources Competitive Grant 11-1018, US Department of Agriculture Nutrition Institute of Food and Agriculture HATCH Project 221082, and US Department of Agriculture Training Grant 2011-38420-20082, and University of California Supplemental Nutrition Assistance Program—Education (SNAP-Ed) Funds."                                                                                                                                     |
| <b>Sevinc 2011</b> <sup>787</sup>             | Not reported.                                                                                                                                                                                                                                                                                                                                                                                                                                                                                                                         |
| <b>Smit 2020</b> <sup>751</sup>               | "The research leading to these results has received funding from the European Research Council under the European Union's Seventh Framework Programme (FP7/2007–2013)/ERC grant agreement n° [617253]."                                                                                                                                                                                                                                                                                                                               |
| <b>Taghdisi 2016</b> <sup>435</sup>           | "This article, as a part of research plan (#92-02-62-20884), approved by Health Research Board of Tehran Medical Sciences University, is the result of an MSc thesis in Health Education."                                                                                                                                                                                                                                                                                                                                            |
| <b>van den Berg 2020</b> <sup>11</sup>        | "This material is based on work that is supported by the National Institute of Food and Agriculture, U.S. Department of Agriculture, under award number 2011-68001-30138. This study was partially funded by the Michael & Susan Dell Foundation through resources provided by the Michael & Susan Dell Center for Healthy Living, The University of Texas (UTHealth) School of Public Health at Austin Campus."                                                                                                                      |
| <b>Vandongen 1995</b> <sup>752</sup>          | "This study was supported by a Program Grant from the National Health and Medical Research Council (Public Health Research and Development Committee)."                                                                                                                                                                                                                                                                                                                                                                               |
| <b>te Velde 2008</b> <sup>788</sup>           | "The study is being carried out with financial support from the Commission of the European Communities, specific Research and Technological Development (RTD) programme 'Quality of Life and Management of Living Resources', QLK1-2001-00 547."                                                                                                                                                                                                                                                                                      |
| <b>Viggiano 2015</b> <sup>753</sup>           | "This research was funded by Second University of Naples, Associazione Culturale Kaledo, Regione Campania (Assessorato all'Istruzione), Provincia di Napoli, Provincia di Salerno Assessorato allo Sport, Comune di Cercola (Assessorato all'istruzione) and Fondazione per l'Assistenza all'Infanzia."                                                                                                                                                                                                                               |
| <b>Zota 2016</b> <sup>789</sup>               | "The DIATROFI Program was funded by the Stavros Niarchos Foundation and has been approved and runs under the auspices of the Greek Ministry of Education and Religious Affairs."                                                                                                                                                                                                                                                                                                                                                      |
| <b>Zhu 2021</b> <sup>790</sup>                | "This study was funded by the Study of Diet and Nutrition Assessment and Intervention Technology (No.2020YFC2006300) from Active Health and Aging Technologic Solutions Major Project of National Key R&D Program—Intervention Strategies of Main Nutrition Problems in China (No.2020YFC2006305); Shanghai Municipal Health Commission—Academic Leader Program (GWV-10.2-XD12); the Foundation of Shanghai Municipal Health Commission (201740073); and the Youth Nutrition Elite Development Program of Chinese Nutrition Society." |

**Supplementary Table 10:** Pairwise meta-analysis of all interventions vs control for BMI

| Study                                               | MD    | 95% CI          | %W (random) |
|-----------------------------------------------------|-------|-----------------|-------------|
| Ask 2010 boys                                       | 0.10  | (-2.67 to 2.87) | 0.2         |
| Ask 2010 girls                                      | 0.20  | (-2.56 to 2.96) | 0.2         |
| Barnes 2021                                         | -0.52 | (-1.98 to 0.94) | 0.8         |
| Chellappah 2015                                     | 0.26  | (-0.05 to 0.57) | 18.0        |
| Davis 2021                                          | -0.02 | (-0.24 to 0.20) | 34.5        |
| Foster 2008                                         | -0.04 | (-0.27 to 0.19) | 32.6        |
| Katz 2011                                           | 0.50  | (-0.26 to 1.25) | 3.0         |
| Lent 2014                                           | 0.20  | (-1.83 to 2.23) | 0.4         |
| Meng 2013                                           | 0.02  | (-1.29 to 1.33) | 1.0         |
| Sevinc 2011                                         | -0.16 | (-0.64 to 0.32) | 7.4         |
| Vandongen 1995 boys                                 | 0.30  | (-1.01 to 1.61) | 1.0         |
| Vandongen 1995 girls                                | -0.20 | (-1.65 to 1.25) | 0.8         |
| Random effects model                                | 0.03  | (-0.10 to 0.16) | 100         |
| Number of participants=4,045                        |       |                 |             |
| $\tau^2=0$ ; $\tau=0$ ; $I^2=0.0\%$ (0.0% to 58.3%) |       |                 |             |

**Abbreviations:** CI=confidence interval; MD=mean difference; W=weight;

**Supplementary Table 11:** Pairwise meta-analysis of all interventions vs control for zBMI

| Study                                                                                               | MD    | 95% CI           | %W (random) |
|-----------------------------------------------------------------------------------------------------|-------|------------------|-------------|
| Barnes 2021                                                                                         | -0.13 | (-0.60 to 0.34)  | 3.2         |
| Davis 2021                                                                                          | -0.02 | (-0.09 to 0.05)  | 24.9        |
| Foster 2008                                                                                         | -0.01 | (-0.08 to 0.06)  | 25.0        |
| Lent 2014                                                                                           | -0.10 | (-0.47 to 0.27)  | 4.8         |
| Meng 2013                                                                                           | -0.00 | (-0.57 to 0.57)  | 2.3         |
| Polonsky 2019                                                                                       | 0.07  | (-0.22 to 0.36)  | 7.2         |
| Scherr 2017                                                                                         | -0.21 | (-0.41 to -0.01) | 11.7        |
| Viggiano 2015                                                                                       | -0.24 | (-0.35 to -0.13) | 20.8        |
| Random effects model                                                                                | -0.09 | (-0.18 to 0.00)  | 100         |
| Number of participants=4,232                                                                        |       |                  |             |
| $\tau^2=0.0070$ (0.0000 to 0.0445); $\tau=0.0839$ (0.0000 to 0.2109); $I^2=59.3\%$ (11.3% to 81.3%) |       |                  |             |

**Abbreviations:** BMI=body mass index; CI=confidence interval; MD=mean difference; W=weight;

**Supplementary Table 12:** GRADE evaluation for BMI and all comparisons (study duration: range 2-36 months)\*

| Comparison                                                                | Direct evidence |                       |                       | Indirect evidence     |                       | Network meta-analysis |                       |
|---------------------------------------------------------------------------|-----------------|-----------------------|-----------------------|-----------------------|-----------------------|-----------------------|-----------------------|
|                                                                           | N studies       | MD (95% CI)           | Certainty of evidence | MD (95% CI)           | Certainty of evidence | MD (95% CI)           | Certainty of evidence |
| Multi-component vs control                                                | 5               | -0.04 (-0.19 to 0.11) | ⊕⊕⊕○ <sup>1</sup>     | -                     | -                     | -0.04 (-0.19 to 0.11) | ⊕⊕○○ <sup>5</sup>     |
| Nutrition education and literacy vs control                               | 3               | 0.21 (-0.34 to 0.77)  | ⊕⊕⊕○ <sup>2</sup>     | -                     | -                     | 0.21 (-0.34 to 0.77)  | ⊕⊕○○ <sup>5</sup>     |
| Nutrition-friendly school initiatives vs control                          | 1               | 0.26 (-0.05 to 0.57)  | ⊕⊕⊕○ <sup>3</sup>     | -                     | -                     | 0.26 (-0.05 to 0.57)  | ⊕⊕○○ <sup>5</sup>     |
| School-based food preparation vs control                                  | 1               | 0.15 (-1.80 to 2.10)  | ⊕⊕○○ <sup>4</sup>     | -                     | -                     | 0.15 (-1.80 to 2.10)  | ⊕○○○ <sup>5</sup>     |
| Multi-component vs nutrition education and literacy                       | 0               | -                     | -                     | -0.25 (-0.83 to 0.32) | ⊕⊕⊕○                  | -0.25 (-0.83 to 0.32) | ⊕⊕○○ <sup>5</sup>     |
| Multi-component vs nutrition-friendly school initiatives                  | 0               | -                     | -                     | -0.30 (-0.64 to 0.04) | ⊕⊕⊕○                  | -0.30 (-0.64 to 0.04) | ⊕⊕○○ <sup>5</sup>     |
| Multi-component vs school-based food preparation                          | 0               | -                     | -                     | -0.19 (-2.15 to 1.77) | ⊕⊕○○                  | -0.19 (-2.15 to 1.77) | ⊕○○○ <sup>5</sup>     |
| Nutrition education and literacy vs nutrition-friendly school initiatives | 0               | -                     | -                     | 0.05 (-0.59 to 0.68)  | ⊕⊕⊕○                  | 0.05 (-0.59 to 0.68)  | ⊕⊕○○ <sup>5</sup>     |
| Nutrition education and literacy vs school-based food preparation         | 0               | -                     | -                     | -0.06 (-2.09 to 1.97) | ⊕⊕○○                  | -0.06 (-2.09 to 1.97) | ⊕○○○ <sup>5</sup>     |
| Nutrition-friendly school initiatives vs school-based food preparation    | 0               | -                     | -                     | 0.11 (-1.87 to 2.09)  | ⊕⊕○○                  | 0.11 (-1.87 to 2.09)  | ⊕○○○ <sup>5</sup>     |

⊕⊕⊕⊕ High; ⊕⊕⊕○ Moderate; ⊕⊕○○ Low; ⊕○○○ Very low.

<sup>1</sup> downgraded by one level due to risk of bias (1/5 of included RCTs rated with high risk of bias).

<sup>2</sup> downgraded by one level due to risk of bias (the included RCTs rated with some concerns for risk of bias).

<sup>3</sup> downgraded by one level due to risk of bias (the included RCT rated with some concerns for risk of bias).

<sup>4</sup> downgraded by two levels due to risk of bias (the included RCT rated as high risk of bias).

<sup>5</sup> downgraded by one level due to imprecision, since 95% CI overlaps null effect.

**Abbreviations:** BMI=body mass index; CI=confidence interval; GRADE=Grading of Recommendations Assessment, Development, and Evaluation; MD=mean difference; RCT=randomised controlled trial; vs=versus;

\*Direct estimates were evaluated with the following GRADE criteria: risk of bias, indirectness, inconsistency and publication bias. As suggested recently by the GRADE working group, consideration of imprecision is not necessary when rating the direct and indirect estimates to inform the rating of network-analysis estimates.

**Supplementary Table 13:** GRADE evaluation for zBMI and all comparisons (study duration: range 9-68 months)\*

| Comparison                                          | Direct evidence |                        |                       | Indirect evidence   |                       | Network meta-analysis  |                       |
|-----------------------------------------------------|-----------------|------------------------|-----------------------|---------------------|-----------------------|------------------------|-----------------------|
|                                                     | N studies       | MD (95% CI)            | Certainty of evidence | MD (95% CI)         | Certainty of evidence | MD (95% CI)            | Certainty of evidence |
| Multi-component vs control                          | 6               | -0.02 (-0.07 to 0.02)  | ⊕⊕⊕○ <sup>1</sup>     | -                   | -                     | -0.02 (-0.07 to 0.02)  | ⊕⊕○○ <sup>3</sup>     |
| Nutrition education and literacy vs control         | 2               | -0.23 (-0.34 to -0.13) | ⊕⊕⊕○ <sup>2</sup>     | -                   | -                     | -0.23 (-0.34 to -0.13) | ⊕⊕⊕○                  |
| Multi-component vs nutrition education and literacy | 0               | -                      |                       | 0.21 (0.10 to 0.32) | ⊕⊕⊕○                  | 0.21 (0.10 to 0.32)    | ⊕⊕⊕○                  |

⊕⊕⊕⊕ High; ⊕⊕⊕○ Moderate; ⊕⊕○○ Low; ⊕○○○ Very low.

<sup>1</sup> downgraded by one level due to risk of bias (2/5 of included RCTs rated with high risk of bias).

<sup>2</sup> downgraded by one level due to risk of bias (included RCTs rated as some concerns for risk of bias).

<sup>3</sup> downgraded by one level due to imprecision, since 95% CI overlaps null effect.

**Abbreviations:** BMI=body mass index; CI=confidence interval; GRADE=Grading of Recommendations Assessment, Development, and Evaluation; MD=mean difference; RCT=randomised controlled trial; vs=versus;

\*Direct estimates were evaluated with the following GRADE criteria: risk of bias, indirectness, inconsistency and publication bias. As suggested recently by the GRADE working group, consideration of imprecision is not necessary when rating the direct and indirect estimates to inform the rating of network-analysis estimates.



**Supplementary Table 14:** Pairwise meta-analysis of all interventions vs control for body weight change

| Study                                               | MD    | 95% CI           | %W (random) |
|-----------------------------------------------------|-------|------------------|-------------|
| Ask 2010 boys                                       | -1.70 | (-11.80 to 8.40) | 0.2         |
| Ask 2010 girls                                      | 0.40  | (-8.55 to 9.35)  | 0.3         |
| Chellappah 2015                                     | 0.61  | (-0.56 to 1.78)  | 16.0        |
| Davis 2021                                          | 0.20  | (-0.32 to 0.72)  | 81.5        |
| Meng 2013                                           | 0.28  | (-2.99 to 3.55)  | 2.0         |
| Random effects model                                | 0.26  | (-0.20 to 0.73)  | 100         |
| Number of participants=3,348                        |       |                  |             |
| $\tau^2=0$ ; $\tau=0$ ; $I^2=0.0\%$ (0.0% to 79.2%) |       |                  |             |

**Abbreviations:** CI=confidence interval; MD=mean difference; W=weight;

**Supplementary Table 15:** Pairwise meta-analysis of all interventions vs control for body fat

| Study                                                                                              | MD   | 95% CI          | %W (random) |
|----------------------------------------------------------------------------------------------------|------|-----------------|-------------|
| Chellappah 2015                                                                                    | 1.54 | ( 0.62 to 2.46) | 37.6        |
| Davis 2021                                                                                         | 0.15 | (-0.39 to 0.69) | 47.5        |
| Vandongen 1995 boys                                                                                | 0.90 | (-2.80 to 4.60) | 6.4         |
| Vandongen 1995 girls                                                                               | 1.10 | (-2.04 to 4.24) | 8.5         |
| Random effects model                                                                               | 0.80 | (-0.20 to 1.80) | 100         |
| Number of participants=3,325                                                                       |      |                 |             |
| $\tau^2=0.4715$ (0.0000 to 9.4368); $\tau=0.6866$ (0.0000 to 3.0719); $I^2=55.0\%$ (0.0% to 85.1%) |      |                 |             |

**Abbreviations:** CI=confidence interval; MD=mean difference; W=weight;

**Supplementary Table 16:** Pairwise meta-analysis of all interventions vs control for waist circumference

| Study                                                                                               | MD    | 95% CI           | %W (random) |
|-----------------------------------------------------------------------------------------------------|-------|------------------|-------------|
| Barnes 2021                                                                                         | -2.18 | (-6.44 to 2.08)  | 13.2        |
| Chellappah 2015                                                                                     | -2.62 | (-4.68 to -0.56) | 32.8        |
| Davis 2021                                                                                          | -0.37 | (-1.12 to 0.38)  | 54.0        |
| Random effects model                                                                                | -1.35 | (-3.10 to 0.40)  | 100         |
| Number of participants=3,286                                                                        |       |                  |             |
| $\tau^2=1.3292$ (0.0000 to 55.4235); $\tau=1.1529$ (0.0000 to 7.4447); $I^2=56.1\%$ (0.0% to 87.5%) |       |                  |             |

**Abbreviations:** CI=confidence interval; MD=mean difference; W=weight;

**Supplementary Table 17:** GRADE evaluation for body weight change (kg) and all comparisons (study duration: range 2-36 months)\*

| Comparison                                                             | Direct evidence |                       |                       | Indirect evidence     |                       | Network meta-analysis |                       |
|------------------------------------------------------------------------|-----------------|-----------------------|-----------------------|-----------------------|-----------------------|-----------------------|-----------------------|
|                                                                        | N studies       | MD (95% CI)           | Certainty of evidence | MD (95% CI)           | Certainty of evidence | MD (95% CI)           | Certainty of evidence |
| Multi-component vs control                                             | 2               | 0.20 (-0.31 to 0.71)  | ⊕⊕⊕○ <sup>1</sup>     | -                     | -                     | 0.20 (-0.31 to 0.71)  | ⊕⊕○○ <sup>4</sup>     |
| Nutrition-friendly school initiatives vs control                       | 1               | 0.61 (-0.56 to 1.78)  | ⊕⊕⊕○ <sup>2</sup>     | -                     | -                     | 0.61 (-0.56 to 1.78)  | ⊕⊕○○ <sup>4</sup>     |
| School-based food preparation vs control                               | 1               | -0.52 (-7.22 to 6.18) | ⊕⊕○○ <sup>3</sup>     | -                     | -                     | -0.52 (-7.22 to 6.18) | ⊕○○○ <sup>4</sup>     |
| Multi-component vs nutrition-friendly school initiatives               | 0               | -                     | -                     | -0.41 (-1.68 to 0.87) | ⊕⊕⊕○                  | -0.41 (-1.68 to 0.87) | ⊕⊕○○ <sup>4</sup>     |
| Multi-component vs school-based food preparation                       | 0               | -                     | -                     | 0.73 (-5.99 to 7.44)  | ⊕⊕○○                  | 0.73 (-5.99 to 7.44)  | ⊕○○○ <sup>4</sup>     |
| Nutrition-friendly school initiatives vs school-based food preparation | 0               | -                     | -                     | 1.13 (-5.67 to 7.93)  | ⊕⊕○○                  | 1.13 (-5.67 to 7.93)  | ⊕○○○ <sup>4</sup>     |

⊕⊕⊕⊕ High; ⊕⊕⊕○ Moderate; ⊕⊕○○ Low; ⊕○○○ Very low.

<sup>1</sup> downgraded by one level due to risk of bias (the included RCTs rated with some concerns for risk of bias).

<sup>2</sup> downgraded by one level due to risk of bias (the included RCT rated with some concerns for risk of bias).

<sup>3</sup> downgraded by two levels due to risk of bias (the included RCT rated as high risk of bias).

<sup>4</sup> downgraded by one level due to imprecision, since 95% CI overlaps null effect.

**Abbreviations:** CI=confidence interval; GRADE=Grading of Recommendations Assessment, Development, and Evaluation; MD=mean difference; RCT=randomised controlled trial; vs=versus;

\*Direct estimates were evaluated with the following GRADE criteria: risk of bias, indirectness, inconsistency and publication bias. As suggested recently by the GRADE working group, consideration of imprecision is not necessary when rating the direct and indirect estimates to inform the rating of NMA estimates

**Supplementary Table 18:** GRADE evaluation for body fat (% body fat) and all comparisons (study duration: range 2-36 months)\*

| Comparison                                                                   | Direct evidence |                      |                       | Indirect evidence      |                       | Network meta-analysis  |                       |
|------------------------------------------------------------------------------|-----------------|----------------------|-----------------------|------------------------|-----------------------|------------------------|-----------------------|
|                                                                              | N studies       | MD (95% CI)          | Certainty of evidence | MD (95% CI)            | Certainty of evidence | MD (95% CI)            | Certainty of evidence |
| Multi-component vs control                                                   | 1               | 0.15 (-0.39 to 0.69) | ⊕⊕⊕○ <sup>1</sup>     | -                      | -                     | 0.15 (-0.39 to 0.69)   | ⊕⊕○○ <sup>2</sup>     |
| Nutrition education and literacy vs control                                  | 1               | 1.02 (-1.38 to 3.41) | ⊕⊕⊕○ <sup>1</sup>     | -                      | -                     | 1.02 (-1.38 to 3.41)   | ⊕⊕○○ <sup>2</sup>     |
| Nutrition-friendly school initiatives vs control                             | 1               | 1.54 (0.62 to 2.46)  | ⊕⊕⊕○ <sup>1</sup>     | -                      | -                     | 1.54 (0.62 to 2.46)    | ⊕⊕⊕○                  |
| Multi-component vs nutrition education and literacy                          | 0               | -                    | -                     | -0.87 (-3.32 to 1.59)  | ⊕⊕⊕○                  | -0.87 (-3.32 to 1.59)  | ⊕⊕○○ <sup>2</sup>     |
| Multi-component vs nutrition-friendly school initiatives                     | 0               | -                    | -                     | -1.39 (-2.46 to -0.32) | ⊕⊕⊕○                  | -1.39 (-2.46 to -0.32) | ⊕⊕⊕○                  |
| Nutrition-friendly school initiatives vs nutrition education and literacy vs | 0               | -                    | -                     | 0.52 (-2.04 to 3.09)   | ⊕⊕⊕○                  | 0.52 (-2.04 to 3.09)   | ⊕⊕○○ <sup>2</sup>     |

⊕⊕⊕⊕ High; ⊕⊕⊕○ Moderate; ⊕⊕○○ Low; ⊕○○○ Very low.

<sup>1</sup> downgraded by one level due to risk of bias (the included RCT rated with some concerns for risk of bias).

<sup>2</sup> downgraded by one level due to imprecision, since 95% CI overlaps null effect.

**Abbreviations:** CI=confidence interval; GRADE=Grading of Recommendations Assessment, Development, and Evaluation; MD=mean difference; RCT=randomised controlled trial; vs=versus;

\*Direct estimates were evaluated with the following GRADE criteria: risk of bias, indirectness, inconsistency and publication bias. As suggested recently by the GRADE working group, consideration of imprecision is not necessary when rating the direct and indirect estimates to inform the rating of NMA estimates.

**Supplementary Table 19:** GRADE evaluation for waist circumference and all comparisons (study duration: range 2-36 months)\*

| Comparison                                                                | Direct evidence |                        |                       | Indirect evidence    |                       | Network meta-analysis  |                       |
|---------------------------------------------------------------------------|-----------------|------------------------|-----------------------|----------------------|-----------------------|------------------------|-----------------------|
|                                                                           | N studies       | MD (95% CI)            | Certainty of evidence | MD (95% CI)          | Certainty of evidence | MD (95% CI)            | Certainty of evidence |
| Multi-component vs control                                                | 1               | -0.37 (-1.12 to 0.38)  | ⊕⊕⊕○ <sup>1</sup>     | -                    | -                     | -0.37 (-1.12 to 0.38)  | ⊕⊕○○ <sup>2</sup>     |
| Nutrition education and literacy vs control                               | 1               | -2.18 (-6.44 to 2.08)  | ⊕⊕⊕○ <sup>1</sup>     | -                    | -                     | -2.18 (-6.44 to 2.08)  | ⊕⊕○○ <sup>2</sup>     |
| Nutrition-friendly school initiatives vs. control                         | 1               | -2.62 (-4.68 to -0.56) | ⊕⊕⊕○ <sup>1</sup>     | -                    | -                     | -2.62 (-4.68 to -0.56) | ⊕⊕⊕○                  |
| Multi-component vs nutrition education and literacy                       | 0               | -                      | -                     | 1.81 (-2.51 to 6.13) | ⊕⊕⊕○                  | 1.81 (-2.51 to 6.13)   | ⊕⊕○○ <sup>2</sup>     |
| Multi-component vs nutrition-friendly school initiatives                  | 0               | -                      | -                     | 2.25 (0.06 to 4.44)  | ⊕⊕⊕○                  | 2.25 (0.06 to 4.44)    | ⊕⊕⊕○                  |
| Nutrition education and literacy vs nutrition-friendly school initiatives | 0               | -                      | -                     | 0.44 (-4.29 to 5.17) | ⊕⊕⊕○                  | 0.44 (-4.29 to 5.17)   | ⊕⊕○○ <sup>2</sup>     |

⊕⊕⊕⊕ High; ⊕⊕⊕○ Moderate; ⊕⊕○○ Low; ⊕○○○ Very low.

<sup>1</sup> downgraded by one level due to risk of bias (the included RCT rated with some concerns for risk of bias).

<sup>2</sup> downgraded by one level due to imprecision, since 95% CI overlaps null effect.

**Abbreviations:** CI=confidence interval; GRADE=Grading of Recommendations Assessment, Development, and Evaluation; MD=mean difference; RCT=randomised controlled trial; vs=versus;

\*Direct estimates were evaluated with the following GRADE criteria: risk of bias, indirectness, inconsistency and publication bias. As suggested recently by the GRADE working group, consideration of imprecision is not necessary when rating the direct and indirect estimates to inform the rating of NMA estimates.

**Supplementary Table 20:** Pairwise meta-analysis of all interventions vs control for fruit and vegetable intake

| Study                                                             | MD     | 95% CI              | %W (random) |
|-------------------------------------------------------------------|--------|---------------------|-------------|
| Anderson 2005                                                     | 72.00  | (-294.01 to 438.01) | 0.6         |
| Baranowski 2000                                                   | 16.00  | (-6.17 to 38.17)    | 7.2         |
| Baranowski 2003                                                   | 72.80  | (71.61 to 73.99)    | 7.5         |
| Bere 2006a                                                        | -16.00 | (-55.93 to 23.93)   | 6.6         |
| Bere 2006b                                                        | 41.60  | (4.95 to 78.25)     | 6.7         |
| Birnbaum 2002                                                     | -28.80 | (-36.64 to -20.96)  | 7.4         |
| Domel 1993                                                        | -0.80  | (-60.32 to 58.72)   | 5.8         |
| Evans 2013                                                        | 2.00   | (-24.38 to 28.38)   | 7.1         |
| Foster 2008                                                       | -3.20  | (-30.00 to 23.60)   | 7.0         |
| Ghaffari 2019                                                     | 18.40  | (-29.13 to 65.93)   | 6.3         |
| He 2009                                                           | 48.00  | (-22.12 to 118.12)  | 5.3         |
| He 2009                                                           | 40.00  | (-38.40 to 118.40)  | 4.9         |
| Nicklas 1998                                                      | 32.00  | (7.33 to 56.67)     | 7.1         |
| Reynolds 2000                                                     | 134.40 | (87.13 to 181.67)   | 6.3         |
| Taghdisi 2016 M                                                   | 38.40  | (25.38 to 51.42)    | 7.4         |
| te Velde 2008                                                     | 39.00  | (7.83 to 70.17)     | 6.9         |
| Random effects model                                              | 28.42  | (-1.61 to 58.45)    | 100         |
| Number of participants=5,611                                      |        |                     |             |
| $\tau^2=3147.773$ ; $\tau=56.105$ ; $I^2=98.1\%$ (97.6% to 98.5%) |        |                     |             |

**Abbreviations:** CI=confidence interval; MD=mean difference; W=weight;

**Supplementary Table 21:** Pairwise meta-analysis of all interventions v. control for fruit intake

| Study                                                             | MD     | 95% CI             | %W (random) |
|-------------------------------------------------------------------|--------|--------------------|-------------|
| Anderson 2005                                                     | 43.00  | (-0.41 to 86.41)   | 4.8         |
| Ashfield-Watt 2009                                                | -28.00 | (-35.84 to -20.16) | 6.3         |
| Baranowski 2000                                                   | 8.00   | (-14.17 to 30.17)  | 5.9         |
| Baranowski 2003                                                   | 41.60  | (15.26 to 67.94)   | 5.7         |
| Bessemis 2012                                                     | 10.40  | (-6.85 to 27.65)   | 6.1         |
| Cohen 2015                                                        | 13.60  | (0.11 to 27.09)    | 6.2         |
| Domel 1993                                                        | 19.20  | (-10.62 to 49.02)  | 5.5         |
| Evans 2013                                                        | -1.00  | (-22.10 to 20.10)  | 5.9         |
| Hoppu 2010                                                        | 24.00  | (-30.91 to 78.91)  | 4.2         |
| Kandiah 2002                                                      | 160.00 | (129.46 to 190.54) | 5.5         |
| Martens 2008                                                      | 8.00   | (-10.37 to 26.37)  | 6.1         |
| Moore 2008                                                        | 2.40   | (-10.94 to 15.74)  | 6.2         |
| Najimi 2013                                                       | 38.40  | (4.55 to 72.25)    | 5.3         |
| Perikkou 2013                                                     | 111.68 | (72.50 to 150.86)  | 5.0         |
| Reynolds 2000                                                     | 70.40  | (43.43 to 97.37)   | 5.7         |
| Scherr 2017                                                       | 5.60   | (-54.14 to 65.34)  | 3.9         |
| Taghdisi 2016                                                     | 44.80  | (19.17 to 70.43)   | 5.7         |
| te Velde 2008                                                     | 30.00  | (5.77 to 54.23)    | 5.8         |
| Random effects model                                              | 32.26  | (13.28 to 51.23)   | 100         |
| Number of participants=5,422                                      |        |                    |             |
| $\tau^2=1461.033$ ; $\tau=38.223$ ; $I^2=93.2\%$ (90.6% to 95.0%) |        |                    |             |

**Abbreviations:** CI=confidence interval; MD=mean difference; W=weight;

**Supplementary Table 22:** Pairwise meta-analysis of all interventions vs control for vegetable intake

| <b>Study</b>                                                     | <b>MD</b> | <b>95% CI</b>       | <b>%W (random)</b> |
|------------------------------------------------------------------|-----------|---------------------|--------------------|
| Anderson 2005                                                    | -2.00     | (-128.28 to 124.28) | 0.8                |
| Baranowski 2000                                                  | -0.00     | (-22.17 to 22.17)   | 8.5                |
| Baranowski 2003                                                  | 19.20     | (7.79 to 30.61)     | 10.9               |
| Cohen 2015                                                       | 12.80     | (6.15 to 19.45)     | 11.7               |
| Domel 1993                                                       | -16.00    | (-53.85 to 21.85)   | 5.5                |
| Evans 2013                                                       | 3.00      | (-14.93 to 20.93)   | 9.5                |
| Hoppu 2010                                                       | 7.00      | (-24.70 to 38.70)   | 6.5                |
| Kandiah 2002                                                     | 112.00    | (74.68 to 149.32)   | 5.5                |
| Najimi 2013                                                      | 55.20     | (24.72 to 85.68)    | 6.8                |
| Reynolds 2000                                                    | 55.20     | (30.35 to 80.05)    | 7.9                |
| Scherr 2017                                                      | -9.60     | (-38.54 to 19.34)   | 7.1                |
| Taghdisi 2016                                                    | 30.40     | (9.69 to 51.11)     | 8.9                |
| te Velde 2008                                                    | 10.00     | (-3.97 to 23.97)    | 10.4               |
| Random effects model                                             | 20.82     | (8.87 to 32.78)     | 100                |
| Number of participants=3,888                                     |           |                     |                    |
| $\tau^2=307.581$ ; $\tau=17.538$ ; $I^2=78.3\%$ (63.3% to 87.1%) |           |                     |                    |

**Abbreviations:** CI=confidence interval; MD=mean difference; W=weight;

**Supplementary Table 23:** GRADE evaluation for fruit and vegetable intake (g/d) and all comparisons (study duration: range 1-36 months)\*

| Comparison                                                                | Direct evidence |                          |                       | Indirect evidence         |                       | Network meta-analysis   |                       |
|---------------------------------------------------------------------------|-----------------|--------------------------|-----------------------|---------------------------|-----------------------|-------------------------|-----------------------|
|                                                                           | N studies       | MD (95% CI)              | Certainty of evidence | MD (95% CI)               | Certainty of evidence | MD (95% CI)             | Certainty of evidence |
| Multi-component vs control                                                | 10              | 31.74 ( 8.22 to 55.26)   | ⊕⊕○○ <sup>1,2</sup>   | -54.08 (-198.57 to 90.40) | ⊕⊕○○                  | 29.52 (6.31 to 52.74)   | ⊕⊕○○ <sup>8</sup>     |
| Nutrition education and literacy vs. control                              | 4               | 33.63 (0.73 to 66.52)    | ⊕⊕○○ <sup>3,4</sup>   | -                         | -                     | 33.63 (0.73 to 66.52)   | ⊕⊕○○                  |
| Nutrition-friendly school initiatives vs control                          | 2               | -10.10 (-61.47 to 41.27) | ⊕⊕○○ <sup>5,6</sup>   | 10.45 (-117.90 to 138.80) | ⊕⊕○○                  | -7.26 (-54.96 to 40.43) | ⊕○○○ <sup>8,9</sup>   |
| Multi-component vs. Nutrition education and literacy                      | 0               | -                        | -                     | -4.10 (-44.36 to 36.16)   | ⊕⊕○○                  | -4.10 (-44.36 to 36.16) | ⊕○○○ <sup>9</sup>     |
| Multi-component vs nutrition-friendly school initiatives                  | 1               | 8.00 (-74.21 to 90.21)   | ⊕⊕⊕○ <sup>7</sup>     | 54.07 (-9.64 to 117.78)   | ⊕⊕○○                  | 36.79 (-13.57 to 87.15) | ⊕○○○ <sup>9</sup>     |
| Nutrition education and literacy vs nutrition-friendly school initiatives | 0               | -                        | -                     | 40.89 (-17.05 to 98.83)   | ⊕⊕○○                  | 40.89 (-17.05 to 98.83) | ⊕○○○ <sup>9</sup>     |

⊕⊕⊕⊕ High; ⊕⊕⊕○ Moderate; ⊕⊕○○ Low; ⊕○○○ Very low.

<sup>1</sup> downgraded by one level due to risk of bias (the sensitivity analysis without high risk of bias studies confirms results of primary analyses).

<sup>2</sup> downgraded by one level due to unexplained inconsistency ( $I^2 = 72\%$ ;  $p < 0.001$ ).

<sup>3</sup> downgraded by one level due to risk of bias (2/4 of included RCTs rated with high risk of bias).

<sup>4</sup> downgraded by one level due to unexplained inconsistency ( $I^2 = 95\%$ ;  $p < 0.001$ ).

<sup>5</sup> downgraded by one level due to risk of bias (1/2 of included RCTs rated with high risk of bias).

<sup>6</sup> downgraded by one level due to unexplained inconsistency ( $I^2 = 66\%$ ;  $p = 0.09$ ).

<sup>7</sup> downgraded by one level due to risk of bias (included RCT rated as some concerns for risk of bias).

<sup>8</sup> direct evidence contributing more to the NMA estimate (>50%) and not downgraded for incoherence since network estimate is similar to dominant (direct) estimate.

<sup>9</sup> downgraded by one level due to imprecision, since 95% CI overlaps null effect.

**Abbreviations:** CI=confidence interval; GRADE=Grading of Recommendations Assessment, Development, and Evaluation; MD=mean difference; RCT=randomised controlled trial; vs=versus;

\*Direct estimates were evaluated with the following GRADE criteria: risk of bias, indirectness, inconsistency and publication bias. As suggested recently by the GRADE working group, consideration of imprecision is not necessary when rating the direct and indirect estimates to inform the rating of NMA estimates.



**Supplementary Table 24:** GRADE evaluation for fruit intake (g/d) and all comparisons (study duration: range 1-36 months)\*

| Comparison                                                                | Direct evidence |                         |                       | Indirect evidence        |                       | Network meta-analysis    |                       |
|---------------------------------------------------------------------------|-----------------|-------------------------|-----------------------|--------------------------|-----------------------|--------------------------|-----------------------|
|                                                                           | N studies       | MD (95% CI)             | Certainty of evidence | MD (95% CI)              | Certainty of evidence | MD (95% CI)              | Certainty of evidence |
| Multi-component vs control                                                | 6               | 31.58 (0.80 to 62.37)   | ⊕⊕○○ <sup>1,2</sup>   | -                        | -                     | 31.58 (0.80 to 62.37)    | ⊕⊕○○                  |
| Nutrition education and literacy vs control                               | 9               | 45.69 (22.23 to 69.14)  | ⊕⊕○○ <sup>3,4</sup>   | -                        | -                     | 45.69 (22.23 to 69.14)   | ⊕⊕○○                  |
| Nutrition-friendly school initiatives vs control                          | 3               | -4.22 (-42.29 to 33.85) | ⊕⊕○○ <sup>1,5</sup>   | -                        | -                     | -4.22 (-42.29 to 33.85)  | ⊕○○○ <sup>6</sup>     |
| Multi-component vs nutrition education and literacy                       | 0               | -                       | -                     | -14.10 (-52.81 to 24.60) | ⊕⊕○○                  | -14.10 (-52.81 to 24.60) | ⊕○○○ <sup>6</sup>     |
| Multi-component vs nutrition-friendly school initiatives                  | 0               | -                       | -                     | 35.80 (-13.16 to 84.77)  | ⊕⊕○○                  | 35.80 (-13.16 to 84.77)  | ⊕○○○ <sup>6</sup>     |
| Nutrition education and literacy vs nutrition-friendly school initiatives | 0               | -                       | -                     | 49.91 (5.19 to 94.62)    | ⊕⊕○○                  | 49.91 (5.19 to 94.62)    | ⊕⊕○○                  |

⊕⊕⊕⊕ High; ⊕⊕⊕○ Moderate; ⊕⊕○○ Low; ⊕○○○ Very low.

<sup>1</sup> downgraded by one level due to risk of bias (the sensitivity analysis without high risk of bias studies confirms results of primary analyses).

<sup>2</sup> downgraded by one level due to unexplained inconsistency ( $I^2 = 63%$ ;  $p=0.02$ ).

<sup>3</sup> downgraded by one level due to risk of bias (5/9 of included RCTs rated with high risk of bias).

<sup>4</sup> downgraded by one level due to unexplained inconsistency ( $I^2 = 93%$ ;  $p<0.001$ ).

<sup>5</sup> downgraded by one level due to unexplained inconsistency ( $I^2 = 94%$ ;  $p<0.001$ ).

<sup>6</sup> downgraded by one level due to imprecision, since 95% CI overlaps null effect.

**Abbreviations:** CI=confidence interval; GRADE=Grading of Recommendations Assessment, Development, and Evaluation; MD=mean difference; RCT=randomised controlled trial; vs=versus;

\*Direct estimates were evaluated with the following GRADE criteria: risk of bias, indirectness, inconsistency and publication bias. As suggested recently by the GRADE working group, consideration of imprecision is not necessary when rating the direct and indirect estimates to inform the rating of NMA estimates.

**Supplementary Table 25:** GRADE evaluation for vegetable intake (g/d) and all comparisons (study duration: range 1-36 months)\*

| Comparison                                                                | Direct evidence |                         |                       | Indirect evidence        |                       | Network meta-analysis    |                       |
|---------------------------------------------------------------------------|-----------------|-------------------------|-----------------------|--------------------------|-----------------------|--------------------------|-----------------------|
|                                                                           | N studies       | MD (95% CI)             | Certainty of evidence | MD (95% CI)              | Certainty of evidence | MD (95% CI)              | Certainty of evidence |
| Multi-component vs control                                                | 6               | 12.32 (-11.03 to 35.68) | ⊕⊕○○ <sup>1,2</sup>   | -                        | -                     | 12.32 (-11.03 to 35.68)  | ⊕○○○ <sup>6</sup>     |
| Nutrition education and literacy vs control                               | 6               | 31.46 (9.49 to 53.43)   | ⊕⊕○○ <sup>3,4</sup>   | -                        | -                     | 31.46 (9.49 to 53.43)    | ⊕⊕○○                  |
| Nutrition-friendly school initiatives vs control                          | 1               | 12.80 (-34.68 to 60.28) | ⊕⊕○○ <sup>5</sup>     | -                        | -                     | 12.80 (-34.68 to 60.28)  | ⊕○○○ <sup>6</sup>     |
| Multi-component vs nutrition education and literacy                       | 0               | -                       | -                     | -19.14 (-51.20 to 12.92) | ⊕⊕○○                  | -19.14 (-51.20 to 12.92) | ⊕○○○ <sup>6</sup>     |
| Multi-component vs. nutrition-friendly school initiatives                 | 0               | -                       | -                     | -0.48 (-53.39 to 52.44)  | ⊕⊕○○                  | -0.48 (-53.39 to 52.44)  | ⊕○○○ <sup>6</sup>     |
| Nutrition education and literacy vs nutrition-friendly school initiatives | 0               | -                       | -                     | 18.66 (-33.66 to 70.98)  | ⊕⊕○○                  | 18.66 (-33.66 to 70.98)  | ⊕○○○ <sup>6</sup>     |

⊕⊕⊕⊕ High; ⊕⊕⊕○ Moderate; ⊕⊕○○ Low; ⊕○○○ Very low.

<sup>1</sup> downgraded by one level due to risk of bias (the sensitivity analysis without high risk of bias studies confirms results of primary analyses).

<sup>2</sup> downgraded by one level due to unexplained inconsistency ( $I^2 = 67\%$ ;  $p = 0.01$ ).

<sup>3</sup> downgraded by one level due to risk of bias (2/6 of included RCTs rated with high risk of bias).

<sup>4</sup> downgraded by one level due to unexplained inconsistency ( $I^2 = 86\%$ ;  $p < 0.001$ ).

<sup>5</sup> downgraded by two levels due to risk of bias (the included RCT rated with high risk of bias).

<sup>6</sup> downgraded by one level due to imprecision, since 95% CI overlaps null effect.

**Abbreviations:** CI=confidence interval; GRADE=Grading of Recommendations Assessment, Development, and Evaluation; MD=mean difference; RCT=randomised controlled trial; vs=versus;

\*Direct estimates were evaluated with the following GRADE criteria: risk of bias, indirectness, inconsistency and publication bias. As suggested recently by the GRADE working group, consideration of imprecision is not necessary when rating the direct and indirect estimates to inform the rating of NMA estimates.

**Supplementary Table 26:** Pairwise meta-analysis of all interventions vs control for fat intake (mean difference)

| <b>Study</b>                                                 | <b>MD</b> | <b>95% CI</b>     | <b>%W (random)</b> |
|--------------------------------------------------------------|-----------|-------------------|--------------------|
| Anderson 2005                                                | -2.89     | (-6.37 to 0.59)   | 15.9               |
| Davis 2021                                                   | 0.80      | (-5.72 to 7.32)   | 7.5                |
| Evans 2013                                                   | 1.20      | (-3.30 to 5.70)   | 12.2               |
| Foster 2008                                                  | -3.78     | (-8.58 to 1.02)   | 11.3               |
| Hoppu 2010                                                   | 0.80      | (-1.75 to 3.35)   | 20.1               |
| Katz 2011                                                    | -0.30     | (-11.65 to 11.05) | 3.0                |
| Vandongen 1995 Boys                                          | -3.62     | (-8.48 to 1.25)   | 11.1               |
| Vandongen 1995 Girls                                         | 3.35      | (0.54 to 6.17)    | 18.9               |
| Random effects model                                         | -0.30     | (-2.36 to 1.77)   | 100                |
| Number of participants=1,766                                 |           |                   |                    |
| $\tau^2=3.827$ ; $\tau=1.956$ ; $I^2=47.4\%$ (0.0% to 76.6%) |           |                   |                    |

**Abbreviations:** CI=confidence interval; MD=mean difference; W=weight;

**Supplementary Table 27:** GRADE evaluation for fat intake (g/d) and all comparisons\*

| Comparison                                          | Direct evidence |                       |                       | Indirect evidence     |                       | Network meta-analysis |                       |
|-----------------------------------------------------|-----------------|-----------------------|-----------------------|-----------------------|-----------------------|-----------------------|-----------------------|
|                                                     | N studies       | MD (95% CI)           | Certainty of evidence | MD (95% CI)           | Certainty of evidence | MD (95% CI)           | Certainty of evidence |
| Multi-component vs control                          | 4               | -1.21 (-3.97 to 1.55) | ⊕⊕⊕○ <sup>1</sup>     | -                     | -                     | -1.21 (-3.97 to 1.55) | ⊕⊕○○ <sup>3</sup>     |
| Nutrition education and literacy vs control         | 3               | 0.83 (-2.21 to 3.87)  | ⊕⊕○○ <sup>2</sup>     | -                     | -                     | 0.83 (-2.21 to 3.87)  | ⊕○○○ <sup>3</sup>     |
| Multi-component vs nutrition education and literacy | 0               | -                     | -                     | -2.04 (-6.14 to 2.06) | ⊕⊕○○                  | -2.04 (-6.14 to 2.06) | ⊕○○○ <sup>3</sup>     |

⊕⊕⊕⊕ High; ⊕⊕⊕○ Moderate; ⊕⊕○○ Low; ⊕○○○ Very low.

<sup>1</sup> downgraded by one level due to risk of bias (1/3 of included RCTs rated with high risk of bias).

<sup>2</sup> downgraded by two levels due to risk of bias (3/3 of included RCTs rated with high risk of bias).

<sup>3</sup> downgraded by one level due to imprecision, since 95% CI overlaps null effect.

**Abbreviations:** CI=confidence interval; GRADE=Grading of Recommendations Assessment, Development, and Evaluation; MD=mean difference; RCT=randomised controlled trial; vs=versus;

\*Direct estimates were evaluated with the following GRADE criteria: risk of bias, indirectness, inconsistency and publication bias. As suggested recently by the GRADE working group, consideration of imprecision is not necessary when rating the direct and indirect estimates to inform the rating of NMA estimates.

**Supplementary Table 28:** Pairwise meta-analysis of multicomponent intervention vs control for SSB intake (mean difference)

| Study                                 | MD     | 95% CI             | %W (random) |
|---------------------------------------|--------|--------------------|-------------|
| <i>Frequency/day</i>                  |        |                    |             |
| Davis 2021                            | -0.06  | (-0.27 to 0.15)    | 90.4        |
| Zhu 2021                              | -0.30  | (-0.94 to 0.34)    | 9.6         |
| Random effects model                  | -0.08  | (-0.28 to 0.12)    | 100         |
| Number of participants=3,231          |        |                    |             |
| $\tau^2= 0$ ; $\tau=0$ ; $I^2= 0.0\%$ |        |                    |             |
| <i>mL/day</i>                         |        |                    |             |
| Ooi 2021                              | -28.58 | (-105.62 to 48.46) | 65.6        |
| Zhu 2021                              | -33.50 | (-139.91 to 72.91) | 34.4        |
| Random effects model                  | -30.27 | (-92.67 to 32.13)  | 100         |
| Number of participants=200            |        |                    |             |
| $\tau^2= 0$ ; $\tau=0$ ; $I^2= 0.0\%$ |        |                    |             |

**Abbreviations:** CI=confidence interval; MD=mean difference; W=weight;

**Supplementary Table 29:** GRADE evidence profile for pairwise (multicomponent intervention vs control group) comparisons on continuous outcomes.

| Certainty assessment                                                   |                   |                           |               |              |                      |                      | № of patients |      | Effect            |                                                        | Certainty        |
|------------------------------------------------------------------------|-------------------|---------------------------|---------------|--------------|----------------------|----------------------|---------------|------|-------------------|--------------------------------------------------------|------------------|
| № of studies                                                           | Study design      | Risk of bias              | Inconsistency | Indirectness | Imprecision          | Other considerations | MCI           | CG   | Relative (95% CI) | Absolute (95% CI)                                      |                  |
| <b>SSB intake - frequency/day</b> (study duration: range 12-36 months) |                   |                           |               |              |                      |                      |               |      |                   |                                                        |                  |
| 2 <sup>771</sup> 7 <sup>90</sup>                                       | randomised trials | serious <sup>a</sup>      | not serious   | not serious  | serious <sup>b</sup> | none                 | 1458          | 1773 | -                 | MD <b>0.08 lower</b><br>(0.28 lower to 0.12 higher)    | ⊕⊕○○<br>Low      |
| <b>SSB intake - mL/day</b> (study duration: range 9-12 months)         |                   |                           |               |              |                      |                      |               |      |                   |                                                        |                  |
| 2 <sup>771</sup> 7 <sup>90</sup>                                       | randomised trials | very serious <sup>c</sup> | not serious   | not serious  | serious <sup>d</sup> | none                 | 102           | 98   | -                 | MD <b>30.27 lower</b><br>(92.67 lower to 32.13 higher) | ⊕○○○<br>Very low |

CG=control group; CI=confidence interval; MCI=multicomponent intervention; M=mean difference;

**Explanations**

- a. Downgraded by one level for RoB, since one out of two RCTs was rated as high RoB.  
 b. Downgraded by one level for imprecision since 95% CI overlap null effect.  
 c. Downgraded by two levels for RoB, since both included RCTs were rated as high RoB.  
 d. Downgraded by one level for imprecision, since number of participants was low (n=200), and 95% CI overlap null effect.

**Supplementary Table 30:** Relative ranking of nutrition interventions (P-scores\*)

| Intervention | BMI<br>(↓)    | zBMI<br>(↓)   | Body weight<br>change<br>(↓) | Body fat<br>(↓) | Waist<br>circumference<br>(↓) | FV intake<br>(↑) | Fruit intake<br>(↑) | Vegetable<br>intake<br>(↑) | Fat intake<br>(↓) |
|--------------|---------------|---------------|------------------------------|-----------------|-------------------------------|------------------|---------------------|----------------------------|-------------------|
| MCI          | <b>0.7604</b> | 0.4231        | 0.4567                       | 0.6812          | 0.3536                        | 0.7795           | 0.7132              | 0.4878                     | <b>0.8202</b>     |
| NEL          | 0.3618        | <b>0.9999</b> | -                            | 0.3677          | 0.6880                        | <b>0.8244</b>    | <b>0.9160</b>       | <b>0.8781</b>              | 0.2303            |
| NFSI         | 0.2483        | -             | 0.2635                       | 0.1168          | <b>0.8481</b>                 | 0.1807           | 0.1681              | 0.4836                     | -                 |
| SBFP         | 0.4831        | -             | 0.5909                       | -               | -                             | -                | -                   | -                          | -                 |
| CG           | 0.6464        | 0.0770        | <b>0.6888</b>                | <b>0.8343</b>   | 0.1103                        | 0.2154           | 0.2028              | 0.1506                     | 0.4495            |

\*P-scores were calculated and presented to obtain relative ranking of nutrition interventions. Higher P-score value indicates greater benefit (larger decrease or increase in outcome of interest) with a certain intervention.

**Abbreviations:** CG=control group; FV=fruit and vegetable; MCI=multicomponent intervention; NEL=nutrition education and literacy; NFSI=nutrition friendly school initiatives; SBFP=school-based food preparation;

**Bolded** are nutrition interventions identified as the best for the given outcome.

(↓) = decrease is the effect of interest; (↑) = increase is the effect of interest

## Subgroup and sensitivity analyses

**Supplementary Table 31:** Sensitivity analysis: using post values instead of change scores for fruit and vegetable intake (g/d)

| Intervention                                                                    | MD    | 95% CI            |
|---------------------------------------------------------------------------------|-------|-------------------|
| Control                                                                         | .     | .                 |
| Multi-component                                                                 | 29.41 | (6.70 to 52.11)   |
| Nutrition education and literacy                                                | 40.95 | (8.48 to 73.41)   |
| Nutrition-friendly school initiatives                                           | -7.73 | (-54.30 to 38.83) |
| Heterogeneity: $\tau^2=873.110$ ; $\tau=29.548$ ; $I^2=85.5\%$ (77.2% to 90.8%) |       |                   |

**Abbreviations:** Ci=confidence interval; MD=mean difference;

**Supplementary Table 32:** Pairwise meta-analysis of all interventions vs control for fruit and vegetable intake (standardised mean difference)

| Study                                                         | SMD   | 95% CI           | %W(random) |
|---------------------------------------------------------------|-------|------------------|------------|
| Anderson 2005                                                 | 0.07  | (-0.48 to 0.62)  | 2.5        |
| Baranowski 2000                                               | 0.05  | (-0.18 to 0.28)  | 7.4        |
| Baranowski 2003                                               | 0.16  | ( 0.06 to 0.26)  | 10.9       |
| Bere 2006a                                                    | -0.08 | (-0.36 to 0.20)  | 6.1        |
| Bere 2006b                                                    | 0.19  | (-0.07 to 0.46)  | 6.5        |
| Birnbaun 2002                                                 | -0.29 | (-0.54 to -0.04) | 6.9        |
| Domel 1993                                                    | 0.48  | (-0.22 to 1.18)  | 1.7        |
| Evans 2013                                                    | 0.01  | (-0.18 to 0.20)  | 8.4        |
| Foster 2008                                                   | -0.09 | (-0.41 to 0.22)  | 5.5        |
| Ghaffari 2019                                                 | 0.19  | (-0.30 to 0.68)  | 3.0        |
| He 2009                                                       | 0.12  | (-0.15 to 0.40)  | 4.1        |
| He 2009                                                       | 0.10  | (-0.17 to 0.37)  | 4.3        |
| Nicklas 1998                                                  | 0.34  | ( 0.08 to 0.61)  | 6.4        |
| Rajbhandari-Thapa 2020                                        | 0.13  | (-0.35 to 0.61)  | 3.2        |
| Rajbhandari-Thapa 2020                                        | -0.12 | (-0.54 to 0.31)  | 3.7        |
| Reynolds 2000                                                 | 0.27  | ( 0.08 to 0.46)  | 8.4        |
| Taghdisi 2016                                                 | 1.98  | ( 1.15 to 2.82)  | 1.3        |
| te Velde 2008                                                 | 0.19  | ( 0.04 to 0.34)  | 9.6        |
| Random effects model                                          | 0.12  | (0.02 to 0.21)   | 100        |
| Number of participants=5,040                                  |       |                  |            |
| $\tau^2=0.020$ ; $\tau=0.143$ ; $I^2=61.7\%$ (36.1% to 77.0%) |       |                  |            |

**Abbreviations:** CI=confidence interval; SMD=standardised mean difference; W=weight;



**Supplementary Table 33:** Sensitivity analysis: using post values instead of change scores for fruit intake (g/d)

| Intervention                                                                    | MD    | 95%-CI            |
|---------------------------------------------------------------------------------|-------|-------------------|
| Control                                                                         | .     | .                 |
| Multi-component                                                                 | 35.54 | (10.97 to 60.10)  |
| Nutrition education and literacy                                                | 33.55 | (15.45 to 51.64)  |
| Nutrition-friendly school initiatives                                           | -4.41 | (-32.64 to 23.83) |
| Heterogeneity: $\tau^2=586.381$ ; $\tau=24.215$ ; $I^2=83.5\%$ (74.5% to 89.3%) |       |                   |

**Abbreviations:** CI=confidence interval; MD=mean difference;

**Supplementary Table 34:** Pairwise meta-analysis of all interventions vs control for fruit intake (standardised mean difference)

| Study                                                         | SMD   | 95%-CI           | % W(random) |
|---------------------------------------------------------------|-------|------------------|-------------|
| Anderson 2005                                                 | 0.61  | ( 0.04 to 1.17)  | 2.8         |
| Ashfield-Watt 2009                                            | -0.46 | (-0.69 to -0.22) | 6.4         |
| Baranowski 2000                                               | 0.02  | (-0.20 to 0.25)  | 6.5         |
| Baranowski 2003                                               | 0.16  | ( 0.06 to 0.26)  | 8.3         |
| Bessems 2012                                                  | 0.14  | (-0.10 to 0.37)  | 6.5         |
| Chellappah 2015                                               | 0.43  | (-0.08 to 0.93)  | 3.3         |
| Cohen 2015                                                    | 0.01  | (-0.30 to 0.32)  | 5.3         |
| Domel 1993                                                    | 0.74  | ( 0.03 to 1.45)  | 2.0         |
| Evans 2013                                                    | -0.01 | (-0.20 to 0.18)  | 7.1         |
| Hoppu 2010                                                    | 0.16  | (-0.18 to 0.50)  | 5.0         |
| Kandiah 2002                                                  | 1.25  | ( 0.51 to 1.99)  | 1.9         |
| Lehto 2014                                                    | 0.17  | (-0.10 to 0.44)  | 5.9         |
| Martens 2008                                                  | 0.10  | (-0.13 to 0.33)  | 6.5         |
| Moore 2008                                                    | 0.03  | (-0.14 to 0.20)  | 7.5         |
| Najimi 2013                                                   | 0.51  | (-0.05 to 1.07)  | 2.8         |
| Perikkou 2013                                                 | 1.03  | ( 0.43 to 1.63)  | 2.6         |
| Reynolds 2000                                                 | 0.25  | ( 0.06 to 0.44)  | 7.1         |
| Scherr 2017                                                   | -0.08 | (-0.60 to 0.44)  | 3.1         |
| Taghdisi 2016                                                 | 1.19  | ( 0.45 to 1.93)  | 1.9         |
| te Velde 2008                                                 | 0.18  | ( 0.03 to 0.33)  | 7.7         |
| Random effects model                                          | 0.18  | ( 0.07 to 0.30)  | 100         |
| Number of participants=5,703                                  |       |                  |             |
| $\tau^2=0.038$ ; $\tau=0.196$ ; $I^2=71.1\%$ (54.6% to 81.6%) |       |                  |             |

**Abbreviations:** CI=confidence interval; SMD=standardised mean difference; W=weight;

**Supplementary Table 35:** Sensitivity analysis: using post values instead of change scores for vegetable intake (g/d)

| Intervention                                                                    | MD    | 95%-CI            |
|---------------------------------------------------------------------------------|-------|-------------------|
| Control                                                                         | .     | .                 |
| Multi-component                                                                 | 13.80 | (-1.79 to 29.40)  |
| Nutrition education and literacy                                                | 21.33 | (7.20 to 35.45)   |
| Nutrition-friendly school initiatives                                           | 12.80 | (-13.96 to 39.56) |
| Heterogeneity: $\tau^2=174.894$ ; $\tau=13.225$ ; $I^2=59.1\%$ (20.5% to 79.0%) |       |                   |

**Abbreviations:** CI=confidence interval; MD=mean difference;

**Supplementary Table 36:** Pairwise meta-analysis of all interventions vs control for vegetable intake (standardised mean difference)

| Study                                                      | SMD   | 95%-CI          | % W(random) |
|------------------------------------------------------------|-------|-----------------|-------------|
| Anderson 2005                                              | -0.01 | (-0.56 to 0.54) | 2.7         |
| Baranowski 2000                                            | -0.00 | (-0.23 to 0.23) | 8.8         |
| Baranowski 2003                                            | 0.17  | ( 0.07 to 0.27) | 14.1        |
| Chellappah 2015                                            | -0.03 | (-0.53 to 0.47) | 3.2         |
| Cohen 2015                                                 | 0.08  | (-0.23 to 0.39) | 6.3         |
| Domel 1993                                                 | 0.28  | (-0.42 to 0.97) | 1.8         |
| Evans 2013                                                 | 0.03  | (-0.17 to 0.22) | 10.2        |
| Hoppu 2010                                                 | -0.01 | (-0.35 to 0.33) | 5.6         |
| Kandiah 2002                                               | 0.15  | (-0.54 to 0.83) | 1.9         |
| Lehto 2014                                                 | -0.00 | (-0.27 to 0.27) | 7.4         |
| Najimi 2013                                                | 0.89  | ( 0.31 to 1.47) | 2.5         |
| Reynolds 2000                                              | 0.21  | ( 0.02 to 0.40) | 10.3        |
| Scherr 2017                                                | 0.08  | (-0.44 to 0.60) | 3.0         |
| Taghdisi 2016                                              | 1.70  | ( 0.91 to 2.50) | 1.4         |
| te Velde 2008                                              | 0.11  | (-0.04 to 0.26) | 12.0        |
| van den Berg 20                                            | 0.01  | (-0.21 to 0.24) | 8.9         |
| Random effects model                                       | 0.12  | (0.02; 0.22)    | 100         |
| Number of participants=4.472                               |       |                 |             |
| $\tau^2=0.015$ ; $\tau=0.123$ ; $I^2=48.2\%$ (7.5%; 71.0%) |       |                 |             |

**Abbreviations:** CI=confidence interval; SMD=standardised mean difference; W=weight;

**Supplementary Table 37:** Sensitivity analysis: using post values instead of change scores for fat intake (g/d)

| Intervention                                                               | MD    | 95%-CI          |
|----------------------------------------------------------------------------|-------|-----------------|
| Control                                                                    | .     | .               |
| Multi-component                                                            | -0.77 | (-4.27 to 2.73) |
| Nutrition education and literacy                                           | 0.60  | (-3.19 to 4.39) |
| Heterogeneity: $\tau^2=8.094$ ; $\tau=2.845$ ; $I^2=63.2\%$ (16.5%; 83.8%) |       |                 |

**Abbreviations:** CI=confidence interval; MD=mean difference;

**Supplementary Table 38:** Pairwise meta-analysis of all interventions vs control for fat intake (standardised mean difference)

| Study                                                         | SMD    | 95%-CI             | %W(random) |
|---------------------------------------------------------------|--------|--------------------|------------|
| Anderson 2005                                                 | -29.22 | (-34.95 to -23.48) | 1.2        |
| Davis 2021                                                    | -0.02  | (-0.30 to 0.26)    | 17.2       |
| Evans 2013                                                    | 0.04   | (-0.15 to 0.23)    | 17.5       |
| Hoppu 2010                                                    | 0.18   | (-0.16 to 0.52)    | 17.0       |
| Kandiah 2002                                                  | -0.92  | (-1.63 to -0.20)   | 14.8       |
| Vandongen 1995 boys                                           | 0.07   | (-0.46 to 0.59)    | 16.0       |
| Vandongen 1995 girls                                          | -0.03  | (-0.53 to 0.46)    | 16.2       |
| Random effects model                                          | -0.46  | (-1.12 to 0.20)    | 100        |
| Number of participants=953                                    |        |                    |            |
| $\tau^2=0.645$ ; $\tau=0.803$ ; $I^2=94.4\%$ (90.8% to 96.6%) |        |                    |            |

**Abbreviations:** CI=confidence interval; SMD=standardised mean difference; W=weight;

**Supplementary Table 39:** Relative ranking of nutrition interventions (SMD sensitivity analysis; P-scores\*)

| <b>Intervention</b> | <b>FV intake<br/>(↑)</b> | <b>Fruit intake<br/>(↑)</b> | <b>Vegetable intake<br/>(↑)</b> | <b>Fat intake<br/>(↓)</b> |
|---------------------|--------------------------|-----------------------------|---------------------------------|---------------------------|
| MCI                 | 0.6851                   | 0.6819                      | 0.4963                          | <b>1.0000</b>             |
| NEL                 | <b>0.9147</b>            | <b>0.9434</b>               | <b>0.9050</b>                   | 0.3133                    |
| NFSI                | 0.2043                   | 0.1329                      | 0.4011                          | -                         |
| SMC                 | 0.3800                   | -                           | -                               | -                         |
| CG                  | 0.3159                   | 0.2418                      | 0.1976                          | 0.1867                    |

\*P-scores were calculated and presented to obtain relative ranking of nutrition interventions. Higher P-score value indicates greater benefit (larger decrease or increase in outcome of interest) of a certain intervention.

**Abbreviations:** MCI=Multicomponent intervention; NEL=Nutrition education and literacy; NFSI=Nutrition friendly school initiatives; SMC=Social marketing campaigns; CG=Control group; FV=fruit and vegetable;

**Bolded** are nutrition interventions identified as the best for the given outcome.

(↓) = decrease is the effect of interest; (↑) = increase is the effect of interest

**Supplementary Table 40:** Sensitivity analysis excluding high RoB RCTs for BMI

|                                       | MD    | 95%-CI        |
|---------------------------------------|-------|---------------|
| Control                               | .     | .             |
| Multi-component                       | -0.04 | (-0.19; 0.11) |
| Nutrition education and literacy      | 0.21  | (-0.34; 0.77) |
| Nutrition-friendly school initiatives | 0.26  | (-0.05; 0.57) |

**Abbreviations:** CI=confidence interval; MD=mean difference;

**Supplementary Table 41:** Sensitivity analysis excluding high RoB RCTs for fruit and vegetable intake

|                                       | MD    | 95%-CI           |
|---------------------------------------|-------|------------------|
| Control                               | .     | .                |
| Multi-component                       | 50.21 | (13.28; 87.15)   |
| Nutrition education and literacy      | 56.00 | (13.51; 98.49)   |
| Nutrition-friendly school initiatives | 41.49 | (-38.82; 121.81) |

**Abbreviations:** CI=confidence interval; MD=mean difference;

**Supplementary Table 42:** Sensitivity analysis excluding high RoB RCTs for fruit intake

|                                       | MD    | 95%-CI            |
|---------------------------------------|-------|-------------------|
| Control                               | .     | .                 |
| Multi-component                       | 49.37 | (-28.44; 127.18)  |
| Nutrition education and literacy      | 71.03 | (18.12; 123.94)   |
| Nutrition-friendly school initiatives | 2.40  | (-100.18; 104.98) |

**Abbreviations:** CI=confidence interval; MD=mean difference;

**Supplementary Table 43:** Sensitivity analysis excluding high RoB RCTs for vegetable intake

|                                  | MD    | 95%-CI          |
|----------------------------------|-------|-----------------|
| Control                          | .     | .               |
| Multi-component                  | 32.18 | (-14.25; 78.61) |
| Nutrition education and literacy | 50.40 | (18.09; 82.70)  |

**Abbreviations:** CI=confidence interval; MD=mean difference;

**Supplementary Table 44:** Subgroup analysis for geographical location for BMI

|                                       | MD    | 95%-CI        |
|---------------------------------------|-------|---------------|
| <b>Australia/Oceania</b>              |       |               |
| Control                               | .     | .             |
| Nutrition education and literacy      | -0.11 | (-0.92; 0.70) |
| Nutrition-friendly school initiatives | 0.26  | (-0.05; 0.57) |
| <b>Asia</b>                           |       |               |
| Control                               | .     | .             |
| Multi-component                       | -0.14 | (-0.59; 0.31) |
| <b>Europe</b>                         |       |               |
| Control                               | .     | .             |
| School-based food preparation         | 0.15  | (-1.80; 2.10) |
| <b>North America</b>                  |       |               |
| Control                               | .     | .             |
| Multi-component                       | -0.03 | (-0.19; 0.13) |
| Nutrition education and literacy      | 0.50  | (-0.26; 1.25) |

**Abbreviations:** CI=confidence interval; MD=mean difference;

**Supplementary Table 45:** Subgroup analysis for age for BMI

|                                  | MD    | 95%-CI        |
|----------------------------------|-------|---------------|
| <b>Age: &lt;10 years</b>         |       |               |
| Control                          | .     | .             |
| Multi-component                  | -0.02 | (-0.24; 0.20) |
| <b>Age: ≥10 years</b>            |       |               |
| Control                          | .     | .             |
| Multi-component                  | -0.04 | (-0.27; 0.19) |
| Nutrition education and literacy | 0.08  | (-0.90; 1.05) |
| School-based food preparation    | 0.15  | (-1.80; 2.10) |

**Abbreviations:** CI=confidence interval; MD=mean difference;

**Supplementary Table 46:** Subgroup analysis for study length for BMI

|                                       | MD    | 95%-CI        |
|---------------------------------------|-------|---------------|
| <b>Study length: &lt;6 months</b>     |       |               |
| Control                               | .     | .             |
| Nutrition education and literacy      | 0.28  | (-0.39; 0.95) |
| Nutrition-friendly school initiatives | 0.26  | (-0.05; 0.57) |
| School-based food preparation         | 0.15  | (-1.80; 2.10) |
| <b>Study length: ≥6 months</b>        |       |               |
| Control                               | .     | .             |
| Multi-component                       | -0.04 | (-0.19; 0.11) |
| Nutrition education and literacy      | 0.08  | (-0.90; 1.05) |

**Abbreviations:** CI=confidence interval; MD=mean difference;

**Supplementary Table 47:** Subgroup analysis for geographical location for fruit and vegetable intake

|                                       | MD    | 95%-CI             |
|---------------------------------------|-------|--------------------|
| <b>Asia</b>                           |       |                    |
| Control                               | .     | .                  |
| Multi-component                       | 18.40 | (-29.13 to 65.93)  |
| Nutrition education and literacy      | 38.40 | ( 25.38 to 51.42)  |
| <b>Europe</b>                         |       |                    |
| Control                               | .     | .                  |
| Multi-component                       | 23.62 | (-7.77 to 55.01)   |
| Nutrition education and literacy      | 2.00  | (-46.92 to 50.92)  |
| <b>North America</b>                  |       |                    |
| Control                               | .     | .                  |
| Multi-component                       | 36.71 | (0.23; 73.19)      |
| Nutrition education and literacy      | 44.99 | (-13.38 to 103.36) |
| Nutrition-friendly school initiatives | -2.33 | (-59.40 to 54.73)  |

**Abbreviations:** CI=confidence interval; MD=mean difference;

**Supplementary Table 48:** Subgroup analysis for age for fruit and vegetable intake

|                                  | MD     | 95%-CI             |
|----------------------------------|--------|--------------------|
| <b>Age: &lt;10 years</b>         |        |                    |
| Control                          | .      | .                  |
| Multi-component                  | 129.88 | (28.15 to 231.61)  |
| Nutrition education and literacy | 38.73  | (-29.31 to 106.77) |
| <b>Age: ≥10 years</b>            |        |                    |
| Control                          | .      | .                  |
| Multi-component                  | 18.35  | (-3.05 to 39.75)   |
| Nutrition education and literacy | 18.02  | (-47.09 to 83.14)  |

**Abbreviations:** CI=confidence interval; MD=mean difference;

**Supplementary Table 49:** Subgroup analysis for study length for fruit and vegetable intake

|                                       | MD     | 95%-CI             |
|---------------------------------------|--------|--------------------|
| <b>Study length: &lt;6 months</b>     |        |                    |
| Control                               | .      | .                  |
| Multi-component                       | 22.87  | (-14.15 to 59.89)  |
| Nutrition education and literacy      | 52.27  | (12.14 to 92.41)   |
| Nutrition-friendly school initiatives | 22.25  | (-51.88 to 96.38)  |
| <b>Study length: ≥6 months</b>        |        |                    |
| Control                               | .      | .                  |
| Multi-component                       | 35.85  | (3.38 to 68.33)    |
| Nutrition education and literacy      | 2.00   | (-74.63 to 78.63)  |
| Nutrition-friendly school initiatives | -28.80 | (-101.17 to 43.57) |

**Abbreviations:** CI=confidence interval; MD=mean difference;

**Supplementary Table 50:** Subgroup analysis for geographical location for fruit intake

|                                       | MD    | 95%-CI              |
|---------------------------------------|-------|---------------------|
| <b>Asia</b>                           |       |                     |
| Control                               | .     | .                   |
| Nutrition education and literacy      | 42.47 | (22.03 to 62.90)    |
| <b>Europe</b>                         |       |                     |
| Control                               | .     | .                   |
| Multi-component                       | 32.56 | (-5.83 to 70.95)    |
| Nutrition education and literacy      | 26.59 | (-2.57 to 55.75)    |
| Nutrition-friendly school initiatives | 2.40  | (-52.28 to 57.08)   |
| <b>North America</b>                  |       |                     |
| Control                               | .     | .                   |
| Multi-component                       | 29.22 | (-40.40 to 98.84)   |
| Nutrition education and literacy      | 73.36 | (5.27 to 141.45)    |
| Nutrition-friendly school initiatives | 13.60 | (-101.52 to 128.72) |

**Abbreviations:** CI=confidence interval; MD=mean difference;

**Supplementary Table 51:** Subgroup analysis for age for fruit intake

|                                       | MD     | 95%-CI             |
|---------------------------------------|--------|--------------------|
| <b>Age: &lt;10 years</b>              |        |                    |
| Control                               | .      | .                  |
| Multi-component                       | 43.06  | (-11.13 to 97.24)  |
| Nutrition education and literacy      | 48.09  | (-2.77 to 98.95)   |
| Nutrition-friendly school initiatives | -28.00 | (-111.42 to 55.42) |
| <b>Age: ≥10 years</b>                 |        |                    |
| Control                               | .      | .                  |
| Multi-component                       | 27.11  | (-101.15 to 55.37) |
| Nutrition education and literacy      | 84.45  | (-41.56 to 210.46) |
| Nutrition-friendly school initiatives | 13.60  | (-163.39 to 90.59) |

**Abbreviations:** CI=confidence interval; MD=mean difference;



**Supplementary Table 52:** Subgroup analysis for study length for fruit intake

|                                       | MD     | 95%-CI             |
|---------------------------------------|--------|--------------------|
| <b>Study length: &lt;6 months</b>     |        |                    |
| Control                               | .      | .                  |
| Multi-component                       | 8.00   | (-89.39 to 105.39) |
| Nutrition education and literacy      | 45.46  | (5.25 to 85.66)    |
| Nutrition-friendly school initiatives | -28.00 | (-123.15 to 67.15) |
| <b>Study length: ≥6 months</b>        |        |                    |
| Control                               | .      | .                  |
| Multi-component                       | 38.33  | (8.36 to 68.30)    |
| Nutrition education and literacy      | 47.30  | (4.05 to 90.56)    |
| Nutrition-friendly school initiatives | 8.00   | (-30.80 to 46.79)  |

**Abbreviations:** CI=confidence interval; MD=mean difference;

**Supplementary Table 53:** Subgroup analysis for geographical location for vegetable intake

|                                       | MD    | 95%-CI            |
|---------------------------------------|-------|-------------------|
| <b>Asia</b>                           |       |                   |
| Control                               | .     | .                 |
| Nutrition education and literacy      | 40.17 | (16.42 to 63.93)  |
| <b>Europe</b>                         |       |                   |
| Control                               | .     | .                 |
| Multi-component                       | 9.40  | (-3.33 to 22.12)  |
| Nutrition education and literacy      | 3.00  | (-14.93 to 20.93) |
| <b>North America</b>                  |       |                   |
| Control                               | .     | .                 |
| Multi-component                       | 15.36 | (-33.51 to 64.22) |
| Nutrition education and literacy      | 37.34 | (-12.50 to 87.18) |
| Nutrition-friendly school initiatives | 12.80 | (-68.21 to 93.81) |

**Abbreviations:** CI=confidence interval; MD=mean difference;

**Supplementary Table 54:** Subgroup analysis for age for vegetable intake

|                                       | MD     | 95%-CI            |
|---------------------------------------|--------|-------------------|
| <b>Age: &lt;10 years</b>              |        |                   |
| Control                               | .      | .                 |
| Multi-component                       | 22.49  | (-11.74 to 56.71) |
| Nutrition education and literacy      | 11.49  | (-20.19 to 43.16) |
| <b>Age: ≥10 years</b>                 |        |                   |
| Control                               | .      | .                 |
| Multi-component                       | 9.51   | (-3.28 to 22.30)  |
| Nutrition education and literacy      | 112.00 | (74.68 to 149.32) |
| Nutrition-friendly school initiatives | 12.80  | (6.15 to 19.45)   |

**Abbreviations:** CI=confidence interval; MD=mean difference;

**Supplementary Table 55:** Subgroup analysis for study length for vegetable intake

|                                       | MD    | 95%-CI            |
|---------------------------------------|-------|-------------------|
| <b>Study length: &lt;6 months</b>     |       |                   |
| Control                               | .     | .                 |
| Multi-component                       | 0.00  | (-83.50 to 83.50) |
| Nutrition education and literacy      | 41.80 | (-1.25 to 84.85)  |
| <b>Study length: ≥6 months</b>        |       |                   |
| Control                               | .     | .                 |
| Multi-component                       | 15.60 | (-8.34 to 39.54)  |
| Nutrition education and literacy      | 3.00  | (-42.48 to 48.48) |
| Nutrition-friendly school initiatives | 12.80 | (-29.52 to 55.12) |

**Abbreviations:** CI=confidence interval; MD=mean difference;

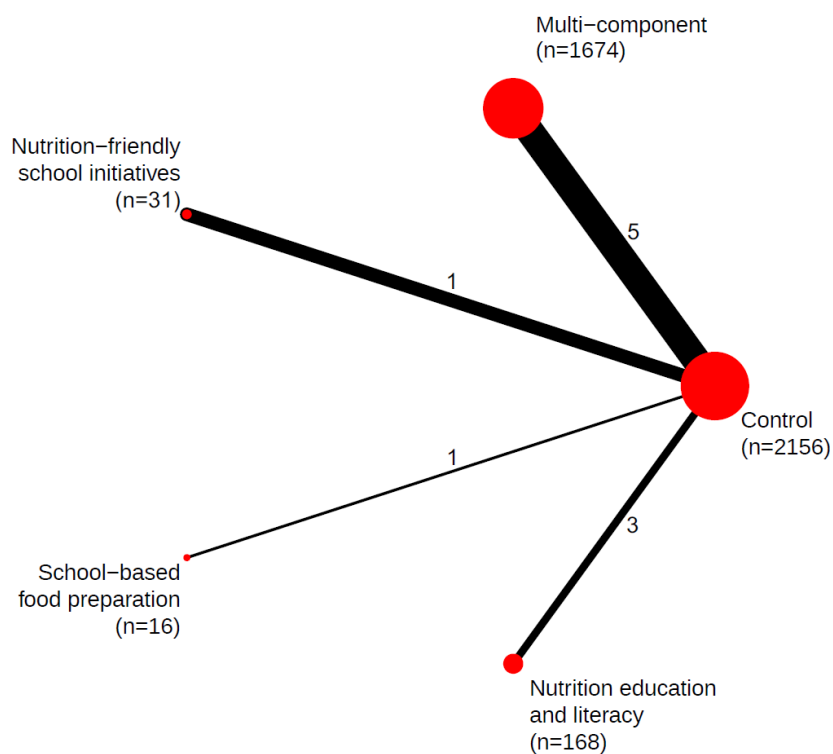

**Supplementary Figure 1a:** Network graph BMI

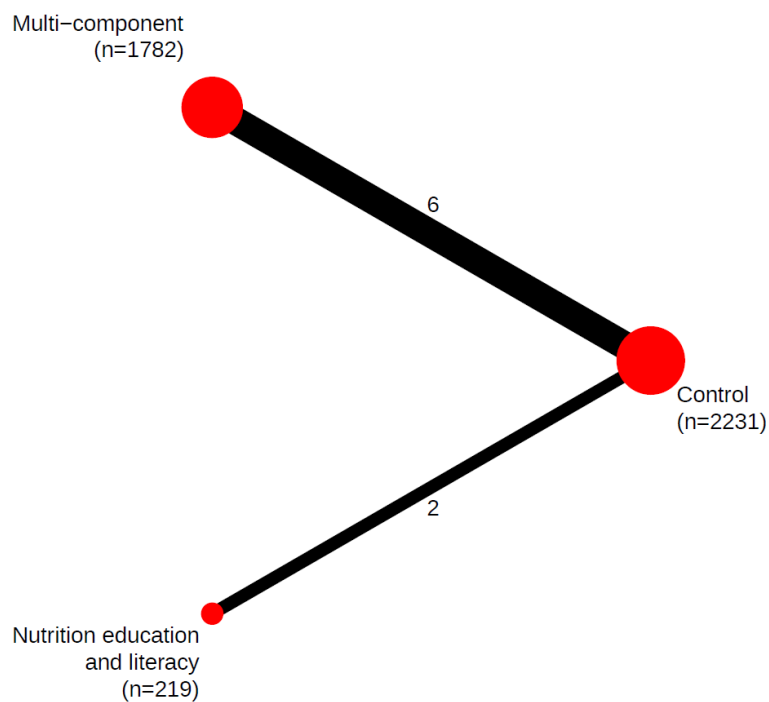

**Supplementary Figure 1b:** Network graph zBMI

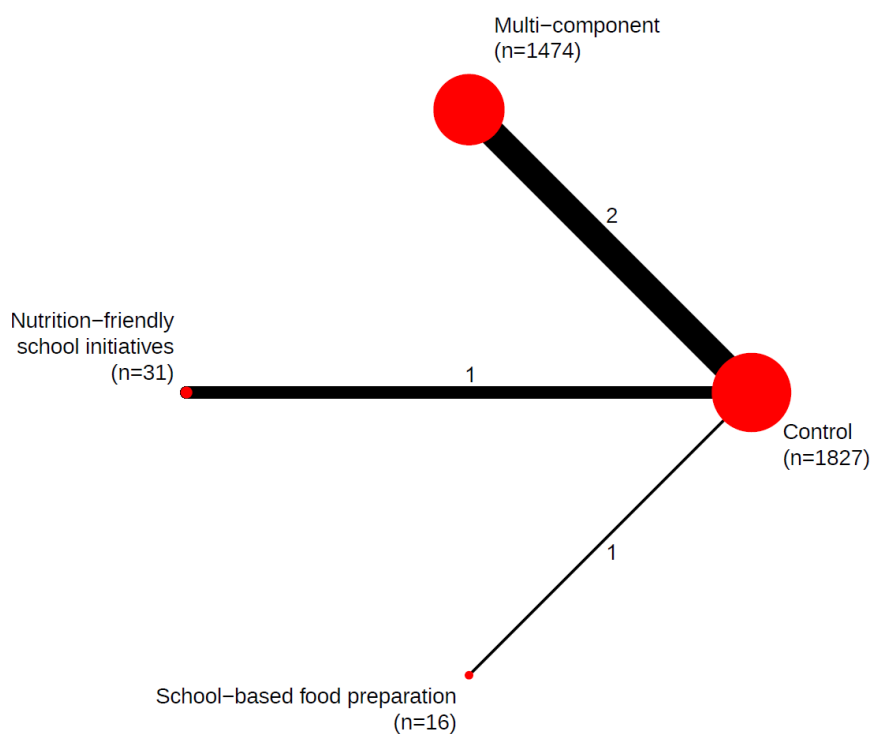

**Supplementary Figure 1c:** Network graph body weight change

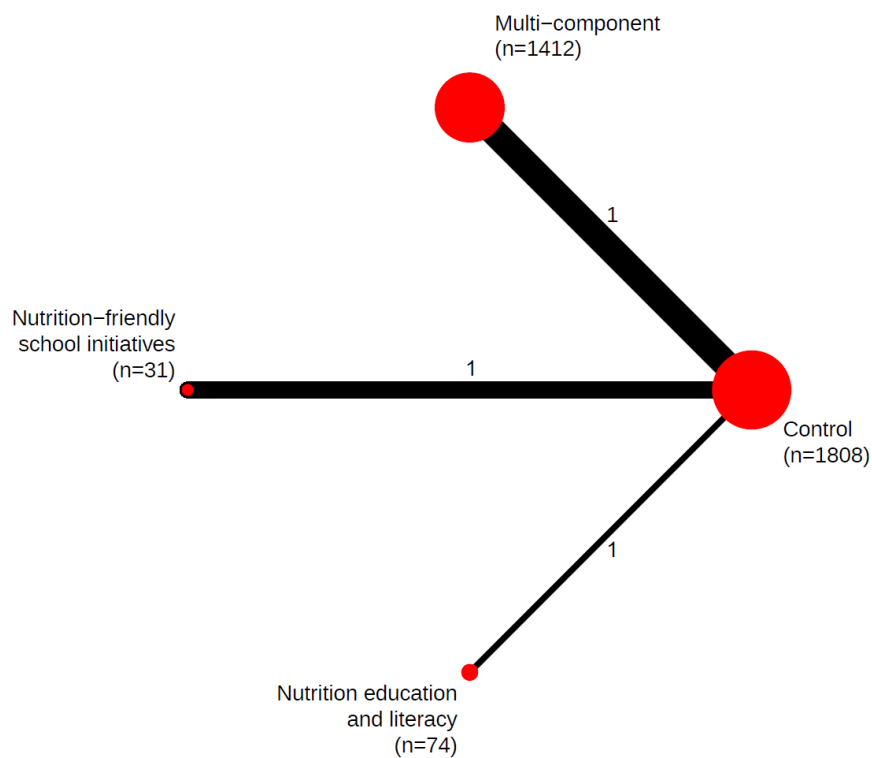

**Supplementary Figure 1d:** Network graph body fat

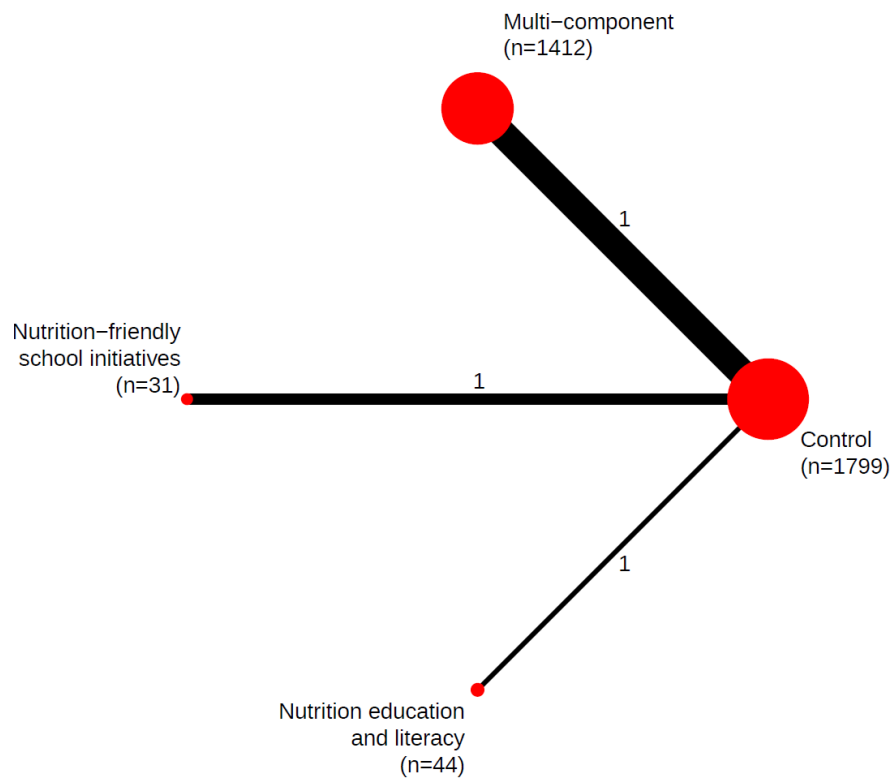

**Supplementary Figure 1e:** Network graph waist circumference

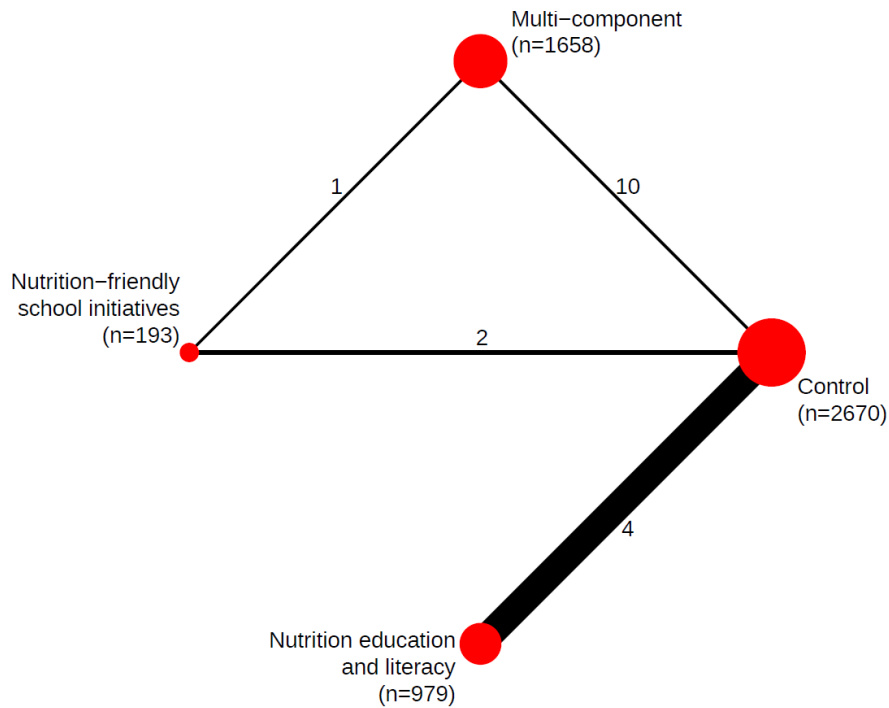

**Supplementary Figure 1f:** Network graph fruit and vegetable intake (mean differences)

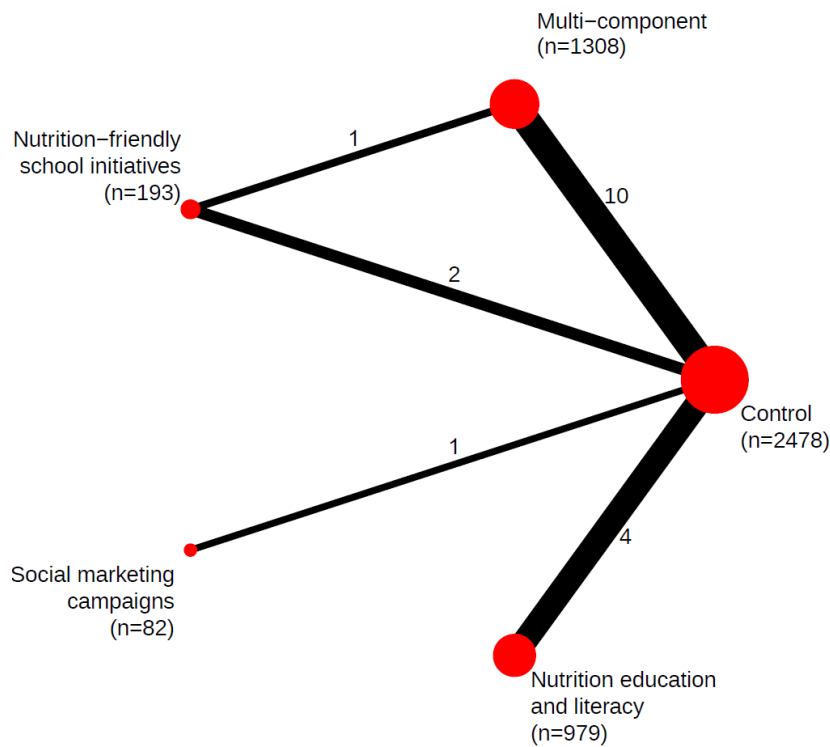

**Supplementary Figure 1g:** Network graph fruit and vegetable intake (standardised mean differences)

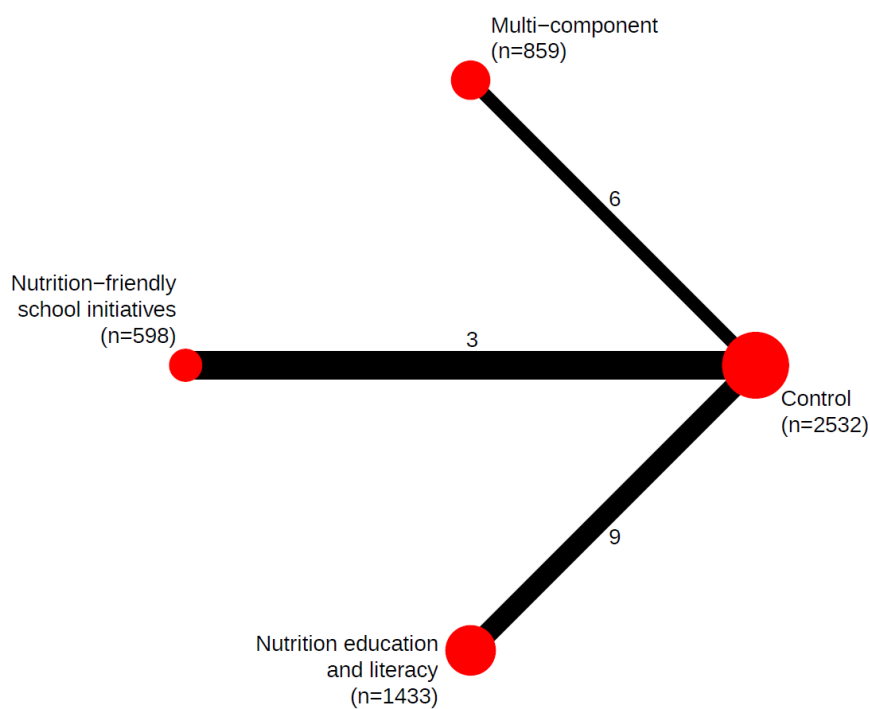

**Supplementary Figure 1h:** Network graph fruit intake (mean differences)

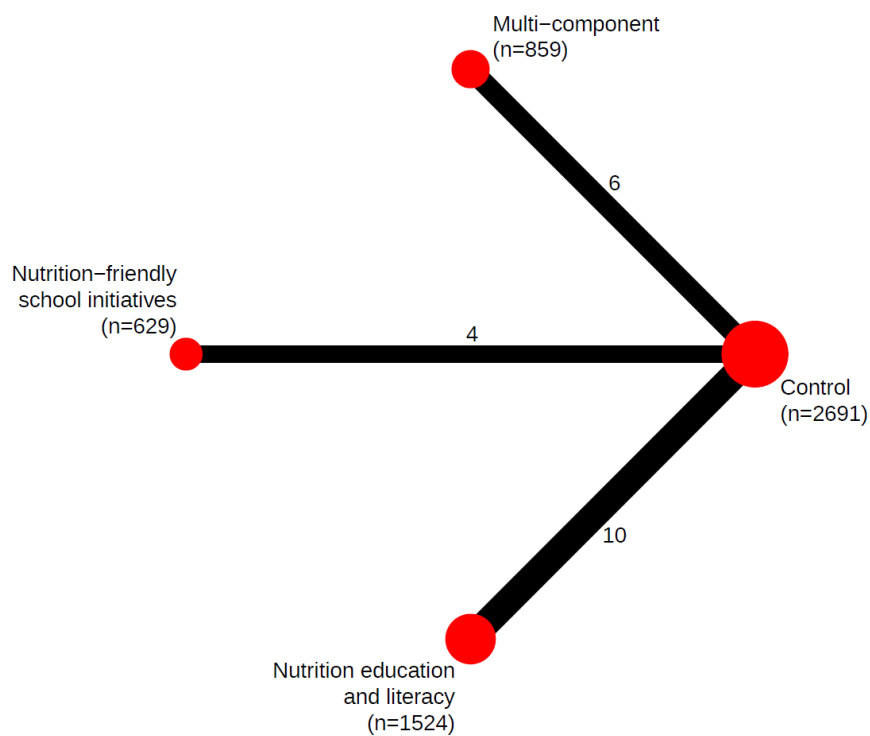

**Supplementary Figure 1i:** Network graph fruit intake (standardised mean differences)

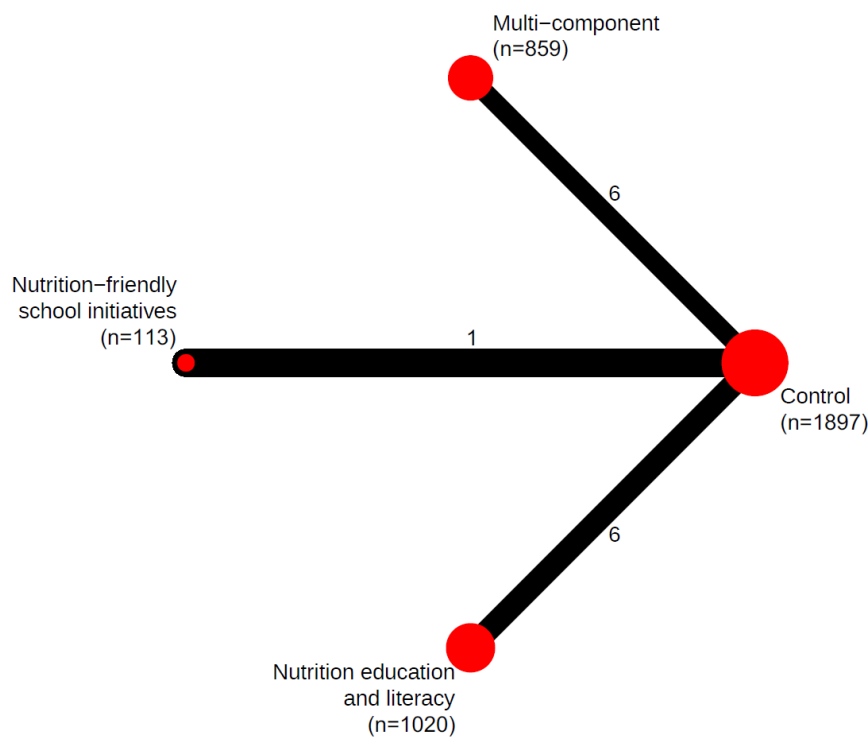

**Supplementary Figure 1j:** Network graph vegetable intake (mean differences)

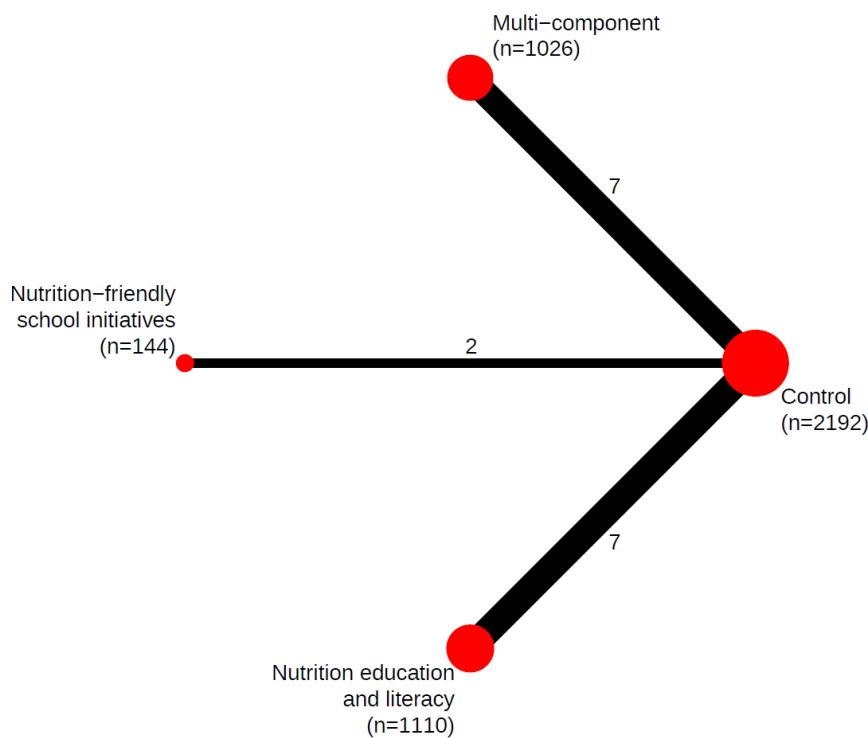

**Supplementary Figure 1k:** Network graph vegetable intake (standardised mean differences)



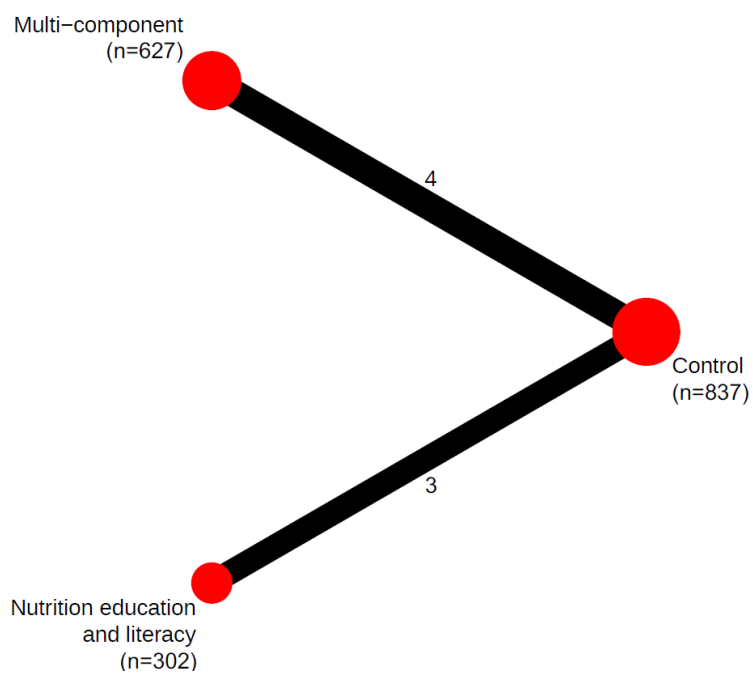

**Supplementary Figure 1l:** Network graph fat intake (mean differences)

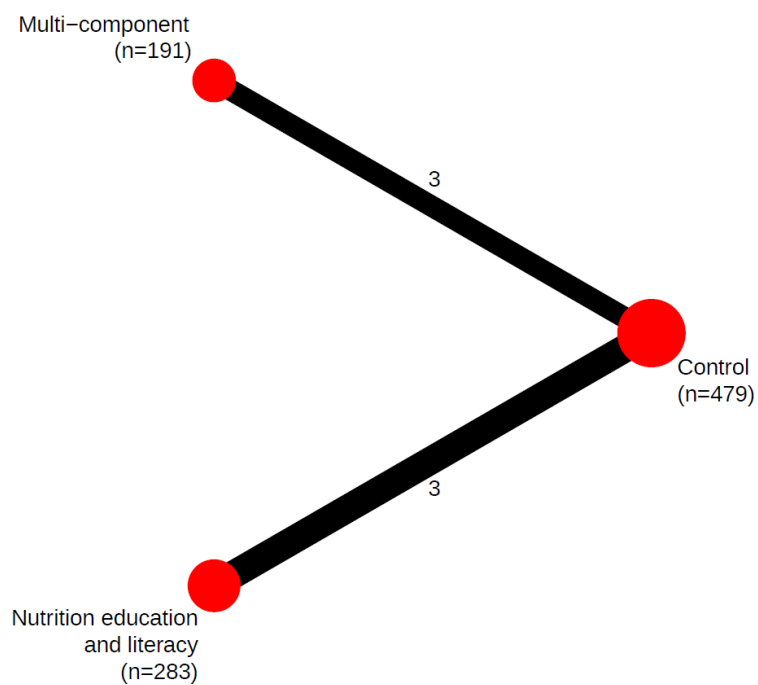

**Supplementary Figure 1m:** Network graph fat intake (standardised mean differences)

| Study                           | Risk of bias domains |     |    |    |    |    | Overall |
|---------------------------------|----------------------|-----|----|----|----|----|---------|
|                                 | D1                   | D1b | D2 | D3 | D4 | D5 |         |
| Anderson 2005                   | ⊖                    | ⊖   | ⊖  | ⊕  | ⊖  | ⊖  | ⊕       |
| Ashfield-Watt 2009              | ⊕                    | ⊕   | ⊖  | ⊕  | ⊖  | ⊖  | ⊕       |
| Ask 2010                        | ⊖                    | ⊕   | ⊖  | ⊕  | ⊖  | ⊖  | ⊕       |
| Baranowski 2000                 | ⊕                    | ⊕   | ⊕  | ⊖  | ⊖  | ⊖  | ⊕       |
| Baranowski 2003                 | ⊕                    | ⊖   | ⊖  | ⊕  | ⊖  | ⊖  | ⊖       |
| Barnes 2021                     | ⊕                    | ⊕   | ⊖  | ⊕  | ⊕  | ⊕  | ⊖       |
| Bere 2006a                      | ⊕                    | ⊖   | ⊖  | ⊕  | ⊖  | ⊖  | ⊕       |
| Bere 2006b                      | ⊕                    | ⊖   | ⊖  | ⊖  | ⊖  | ⊖  | ⊖       |
| Bessems 2012                    | ⊖                    | ⊕   | ⊖  | ⊕  | ⊖  | ⊖  | ⊕       |
| Birnbaum 2002                   | ⊖                    | ⊕   | ⊕  | ⊖  | ⊖  | ⊖  | ⊕       |
| Bogart 2016                     | ⊕                    | ⊖   | ⊖  | ⊕  | ⊖  | ⊖  | ⊕       |
| Chellappah 2015 (Anthropometry) | ⊕                    | ⊖   | ⊖  | ⊕  | ⊖  | ⊖  | ⊖       |
| Chellappah 2015 (Dietary)       | ⊕                    | ⊖   | ⊖  | ⊕  | ⊖  | ⊖  | ⊖       |
| Cohen 2015                      | ⊕                    | ⊖   | ⊖  | ⊕  | ⊖  | ⊕  | ⊕       |
| Davis 2021 (Anthropometry)      | ⊕                    | ⊕   | ⊖  | ⊕  | ⊕  | ⊕  | ⊖       |
| Davis 2021 (Dietary)            | ⊕                    | ⊕   | ⊖  | ⊕  | ⊖  | ⊕  | ⊖       |
| Domel 1993                      | ⊕                    | ⊖   | ⊖  | ⊕  | ⊖  | ⊖  | ⊕       |
| Evans 2013                      | ⊕                    | ⊕   | ⊕  | ⊕  | ⊖  | ⊕  | ⊕       |
| Fonseca 2019                    | ⊖                    | ⊖   | ⊖  | ⊕  | ⊖  | ⊖  | ⊕       |
| Foster 2008 (Anthropometry)     | ⊖                    | ⊕   | ⊖  | ⊖  | ⊖  | ⊖  | ⊖       |
| Foster 2008 (Dietary)           | ⊖                    | ⊕   | ⊖  | ⊖  | ⊖  | ⊖  | ⊖       |
| Ghaffari 2019                   | ⊕                    | ⊖   | ⊖  | ⊕  | ⊖  | ⊕  | ⊕       |
| Gold 2017                       | ⊕                    | ⊖   | ⊖  | ⊖  | ⊕  | ⊖  | ⊕       |
| Greene 2017                     | ⊕                    | ⊕   | ⊖  | ⊕  | ⊖  | ⊖  | ⊖       |
| He 2009                         | ⊕                    | ⊖   | ⊖  | ⊖  | ⊖  | ⊖  | ⊖       |
| Hoppu 2010                      | ⊕                    | ⊕   | ⊖  | ⊕  | ⊖  | ⊖  | ⊖       |
| Kandiah 2002                    | ⊕                    | ⊕   | ⊖  | ⊖  | ⊖  | ⊖  | ⊖       |
| Katz 2011 (Anthropometry)       | ⊕                    | ⊖   | ⊖  | ⊖  | ⊖  | ⊖  | ⊖       |
| Katz 2011 (Dietary)             | ⊕                    | ⊖   | ⊖  | ⊕  | ⊖  | ⊖  | ⊕       |
| LaChaussee 2017                 | ⊕                    | ⊕   | ⊖  | ⊖  | ⊖  | ⊖  | ⊖       |
| Lent 2014                       | ⊕                    | ⊕   | ⊕  | ⊕  | ⊖  | ⊖  | ⊕       |
| Lehto 2014                      | ⊕                    | ⊕   | ⊖  | ⊖  | ⊖  | ⊖  | ⊕       |
| Marcano-Olivier 2019            | ⊖                    | ⊕   | ⊖  | ⊕  | ⊖  | ⊖  | ⊖       |
| Martens 2008                    | ⊖                    | ⊕   | ⊖  | ⊕  | ⊖  | ⊖  | ⊕       |
| Meng 2013                       | ⊕                    | ⊕   | ⊖  | ⊖  | ⊕  | ⊕  | ⊖       |
| Moore 2008                      | ⊖                    | ⊕   | ⊖  | ⊕  | ⊖  | ⊕  | ⊖       |
| Najimi 2013                     | ⊕                    | ⊖   | ⊖  | ⊕  | ⊖  | ⊖  | ⊖       |
| Nicklas 1998                    | ⊖                    | ⊕   | ⊖  | ⊕  | ⊖  | ⊖  | ⊕       |
| Ooi 2021 (Anthropometry)        | ⊕                    | ⊕   | ⊕  | ⊕  | ⊕  | ⊕  | ⊕       |
| Ooi 2021 (Dietary)              | ⊕                    | ⊕   | ⊕  | ⊖  | ⊕  | ⊕  | ⊕       |
| Perikkou 2013                   | ⊕                    | ⊕   | ⊖  | ⊖  | ⊖  | ⊖  | ⊕       |
| Perry 1998                      | ⊕                    | ⊖   | ⊖  | ⊕  | ⊖  | ⊖  | ⊖       |
| Perry 2004                      | ⊕                    | ⊕   | ⊕  | ⊖  | ⊖  | ⊖  | ⊖       |
| Polonsky 2019                   | ⊕                    | ⊕   | ⊕  | ⊕  | ⊕  | ⊕  | ⊕       |
| Rajbhandari-Thapa 2020          | ⊖                    | ⊕   | ⊖  | ⊕  | ⊖  | ⊖  | ⊖       |
| Reynolds 2000                   | ⊕                    | ⊕   | ⊖  | ⊖  | ⊖  | ⊖  | ⊖       |
| Scherr 2017 (Anthropometry)     | ⊕                    | ⊖   | ⊖  | ⊖  | ⊕  | ⊕  | ⊖       |
| Scherr 2017 (Dietary)           | ⊕                    | ⊖   | ⊖  | ⊕  | ⊖  | ⊕  | ⊕       |
| Sevinc 2011                     | ⊕                    | ⊖   | ⊖  | ⊖  | ⊖  | ⊖  | ⊖       |
| Smit 2020                       | ⊖                    | ⊖   | ⊖  | ⊕  | ⊖  | ⊖  | ⊖       |
| Taghdisi 2016                   | ⊕                    | ⊖   | ⊖  | ⊕  | ⊖  | ⊖  | ⊖       |
| te Velde 2008                   | ⊕                    | ⊕   | ⊕  | ⊕  | ⊖  | ⊖  | ⊕       |
| van den Berg 2020               | ⊕                    | ⊖   | ⊕  | ⊖  | ⊖  | ⊕  | ⊕       |
| Vandongen 1995 (Anthropometry)  | ⊖                    | ⊖   | ⊖  | ⊖  | ⊖  | ⊖  | ⊖       |
| Vandongen 1995 (Dietary)        | ⊖                    | ⊖   | ⊖  | ⊖  | ⊕  | ⊖  | ⊕       |
| Viggiano 2015                   | ⊕                    | ⊕   | ⊕  | ⊖  | ⊖  | ⊖  | ⊖       |
| Zhu 2021                        | ⊕                    | ⊕   | ⊕  | ⊕  | ⊕  | ⊖  | ⊕       |
| Zota 2016                       | ⊕                    | ⊕   | ⊖  | ⊕  | ⊖  | ⊖  | ⊕       |

Domains:  
D1: Bias arising from the randomization process.  
D1b: Bias arising from the timing of identification and recruitment of individual participants in relation to timing of randomization.  
D2: Bias due to deviations from intended intervention.  
D3: Bias due to missing outcome data.  
D4: Bias in measurement of the outcome.  
D5: Bias in selection of the reported result.

Judgement  
⊕ High  
⊖ Some concerns  
⊕ Low

Supplementary Figure 2: Summary of the risk of bias assessment for the included RCTs

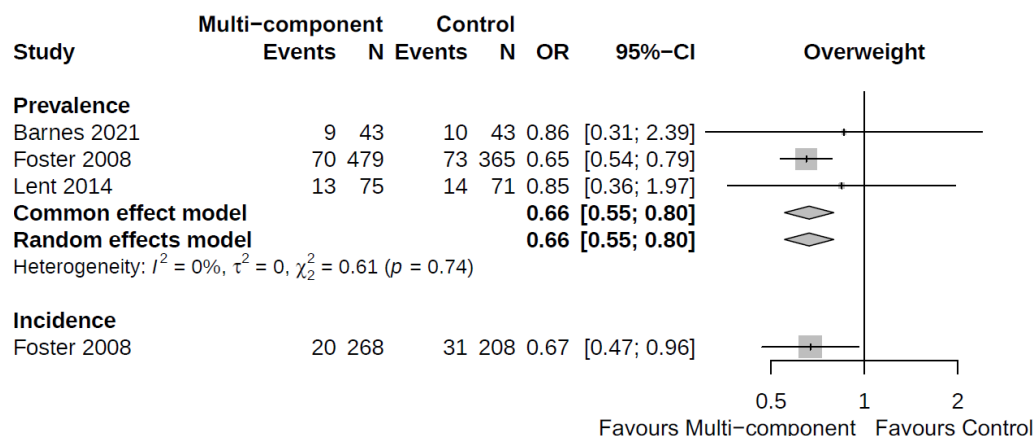

Supplementary Figure 3: Forest plot overweight risk (pairwise meta-analysis)

CI=confidence interval; N=number of participants; OR=odds ratio

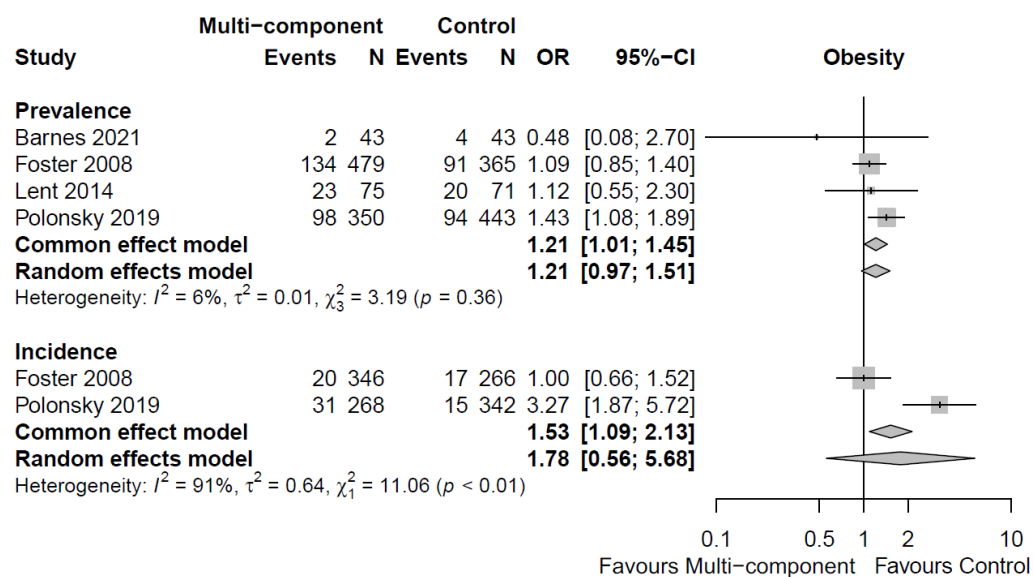

Supplementary Figure 4: Forest plot obesity risk (pairwise meta-analysis)

CI=confidence interval; N=number of participants; OR=odds ratio

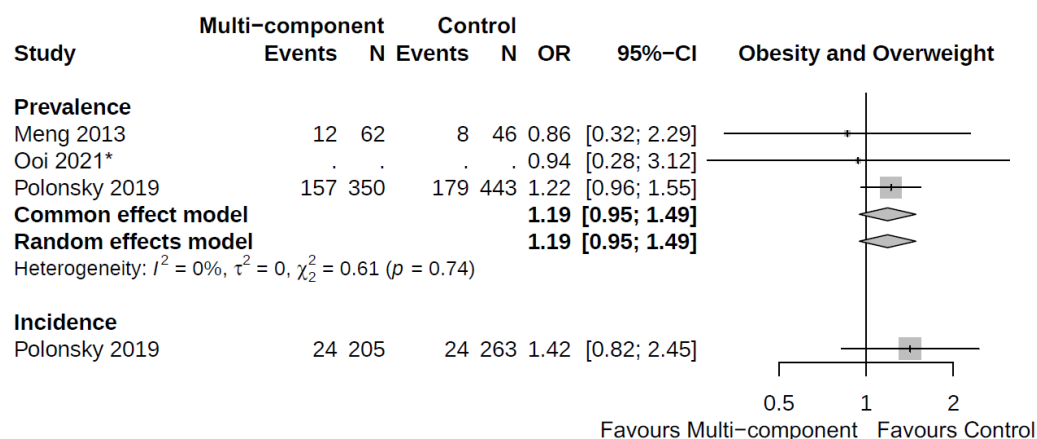

**Supplementary Figure 5a:** Forest plot overweight/obesity risk (pairwise meta-analysis)

\*No clustering adjustment was made in the Ooi 2021 study and only the OR was reported.

CI=confidence interval; N=number of participants; OR=odds ratio;

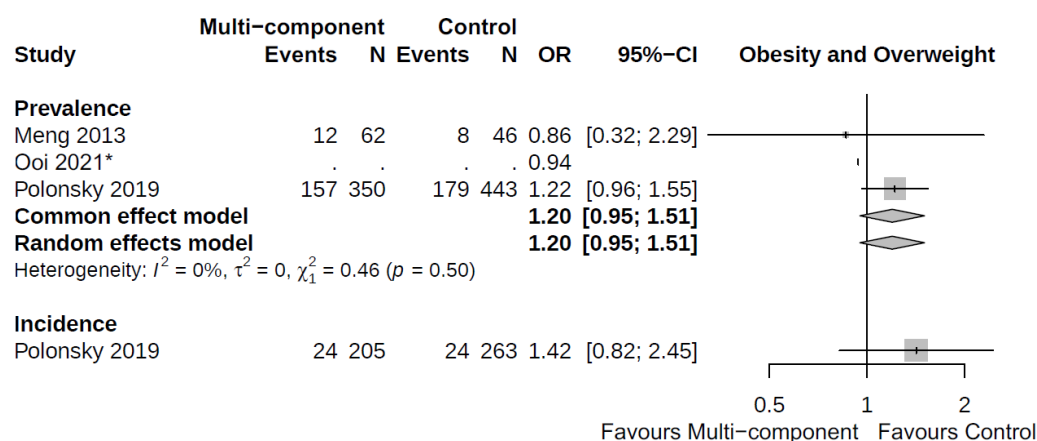

**Supplementary Figure 5b:** Forest plot overweight/obesity risk (pairwise meta-analysis)

\*Sensitivity analysis excluding Ooi 2021 (as no clustering adjustment was made in the study and only the OR was reported).

CI=confidence interval; N=number of participants; OR=odds ratio;

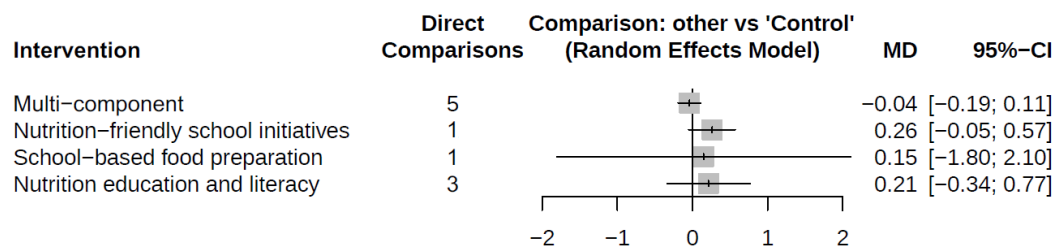**Supplementary Figure 6:** Forest plot BMI

BMI=body mass index; CI=confidence interval; MD=mean difference;

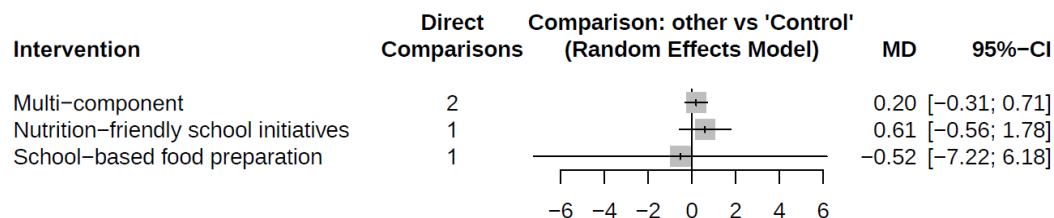**Supplementary Figure 7:** Forest plot body weight change (kg)

CI=confidence interval; MD=mean difference;

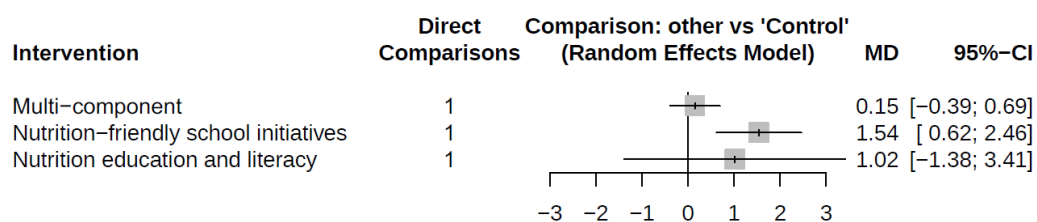**Supplementary Figure 8:** Forest plot body fat (%)

CI=confidence interval; MD=mean difference;

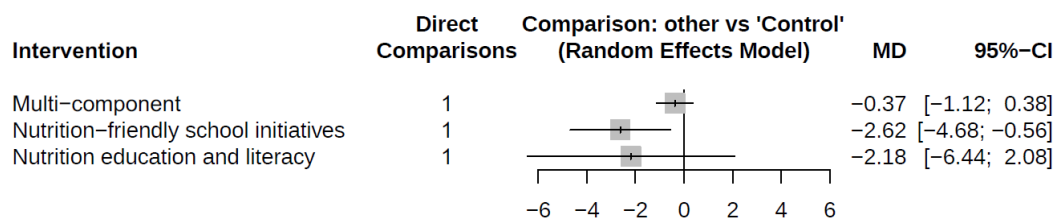

**Supplementary Figure 9:** Forest plot waist circumference (cm)

CI=confidence interval; MD=mean difference;

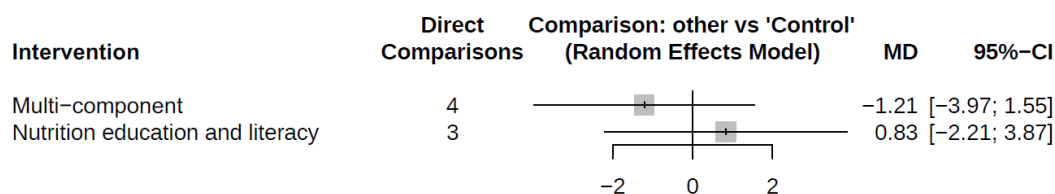

**Supplementary Figure 10:** Forest plot fat intake (g/d)

CI=confidence interval; MD=mean difference;

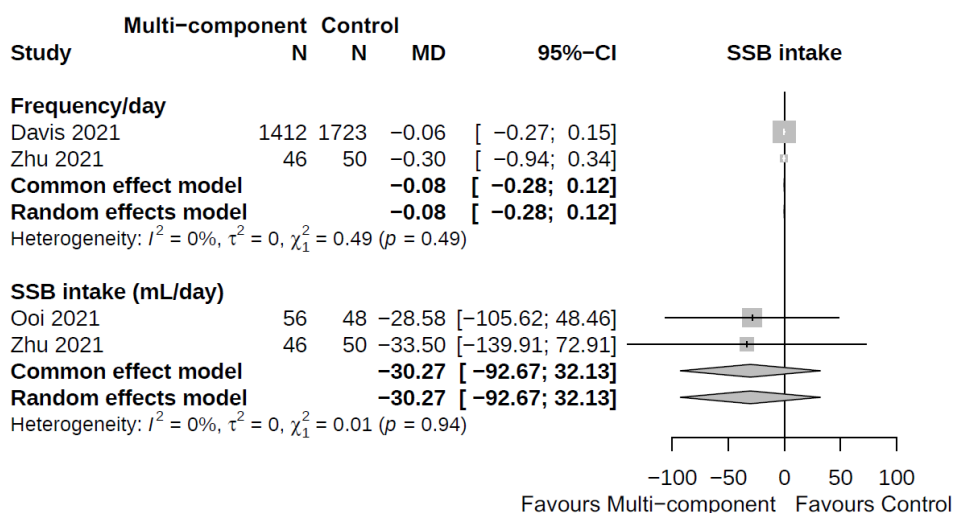

**Supplementary Figure 11:** SSB intake (pairwise meta-analysis)

CI=confidence interval; MD=mean difference;

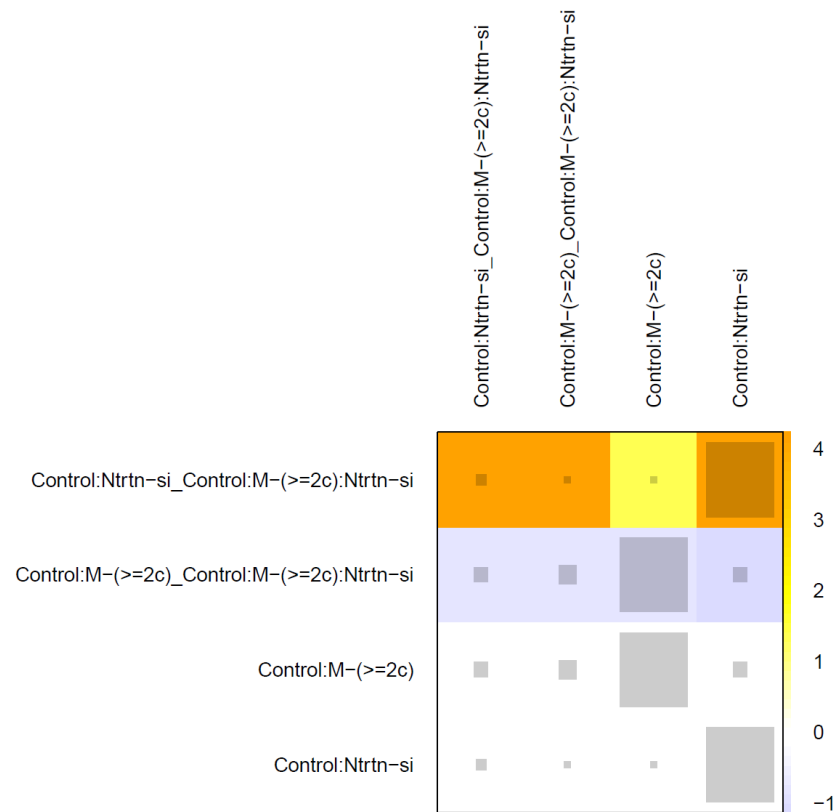

**Supplementary Figure 12:** Net-heat plot\* to assess inconsistency for fruit and vegetable intake (mean difference)

\*This plot is a heat map where the colours on the diagonal represent the inconsistency contribution of the corresponding design and the colours on the off-diagonal are associated with the change in inconsistency between direct and indirect evidence in a network estimate in the row after relaxing the consistency assumption for the effect of a design in the column. A blue coloured element indicates that the evidence of the design in the column supports the evidence in the row; a red coloured element indicates that the evidence of the design in the column contrasts to the evidence in the row.

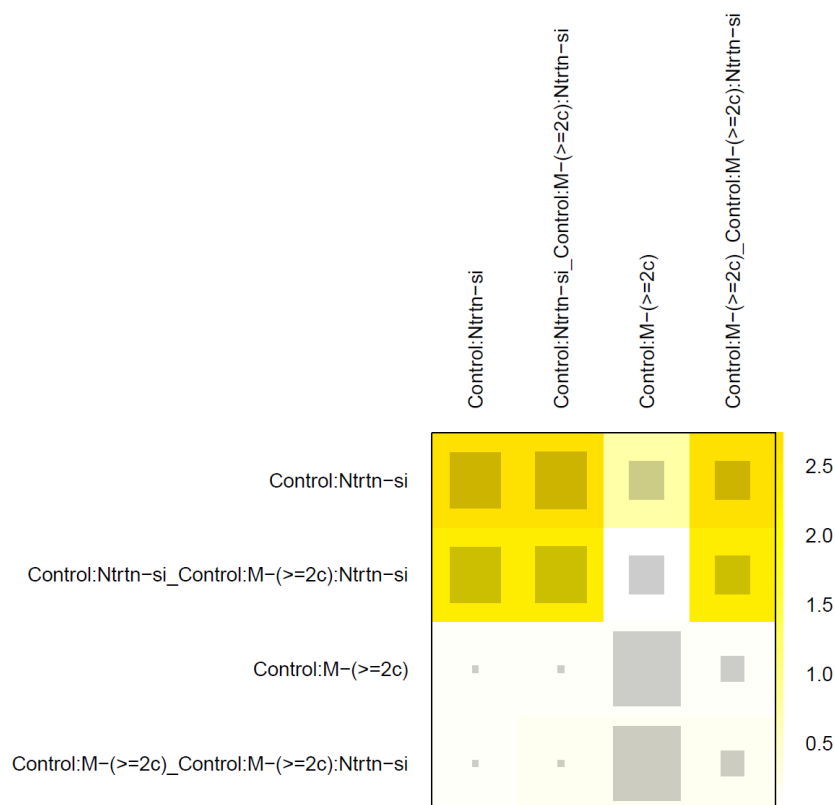

**Supplementary Figure 13:** Net-heat plot\* to assess inconsistency for fruit and vegetable intake (standardised mean difference)

\*This plot is a heat map where the colours on the diagonal represent the inconsistency contribution of the corresponding design and the colours on the off-diagonal are associated with the change in inconsistency between direct and indirect evidence in a network estimate in the row after relaxing the consistency assumption for the effect of a design in the column. A blue coloured element indicates that the evidence of the design in the column supports the evidence in the row; a red coloured element indicates that the evidence of the design in the column contrasts to the evidence in the row.



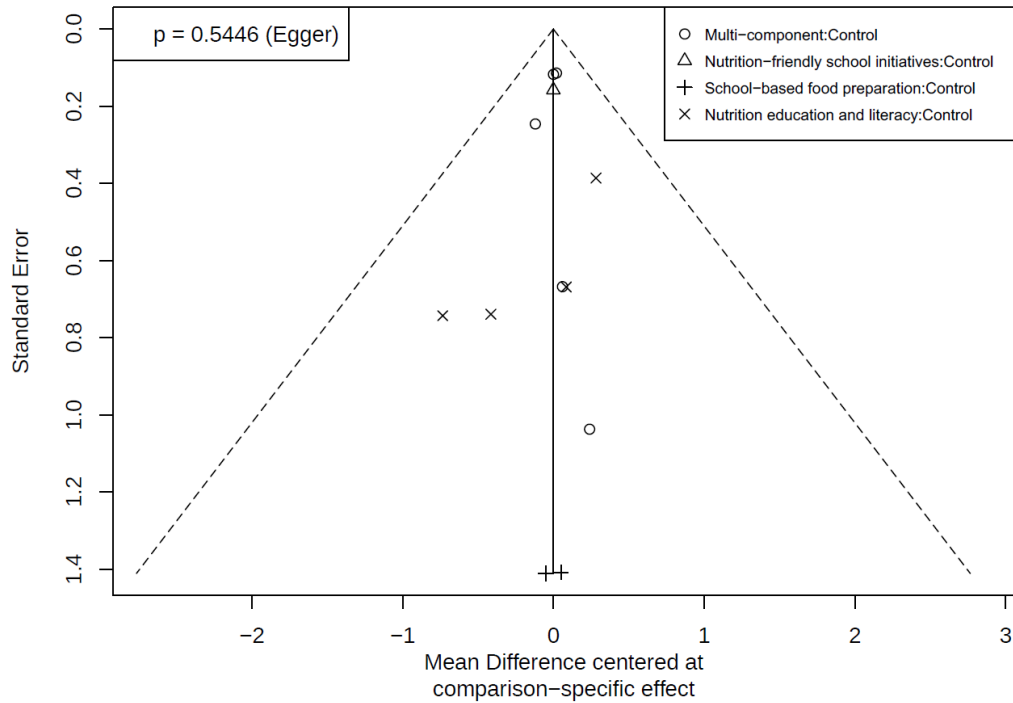

**Supplementary Figure 14:** Comparison adjusted funnel plot for body mass index

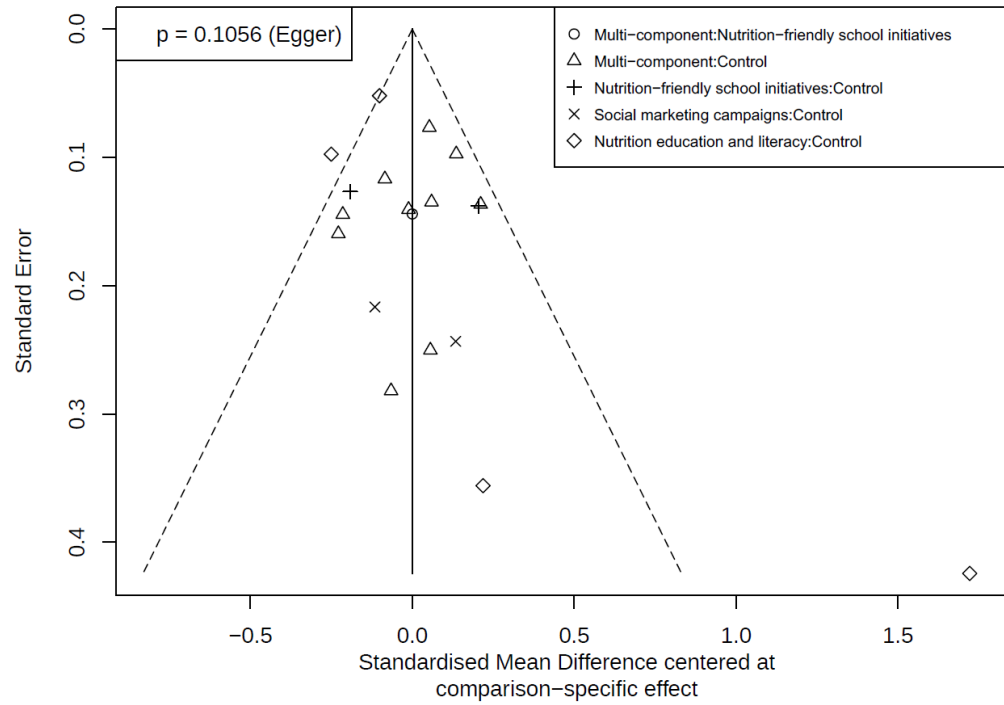

**Supplementary Figure 15:** Comparison adjusted funnel plot for fruit and vegetable intake

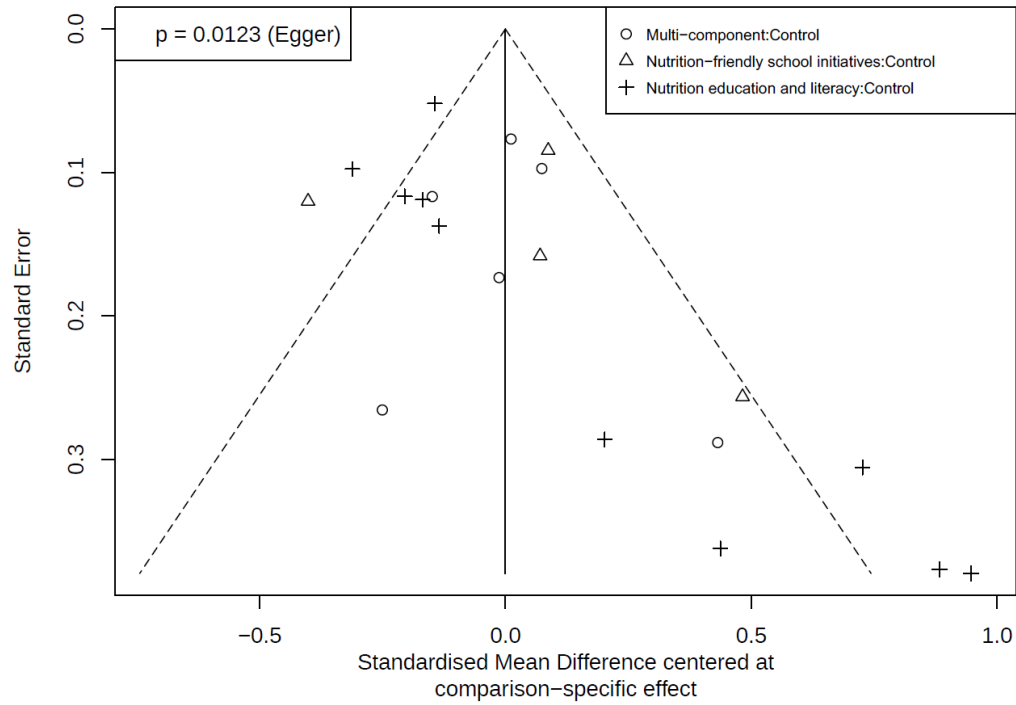

**Supplementary Figure 16:** Comparison adjusted funnel plot for fruit intake

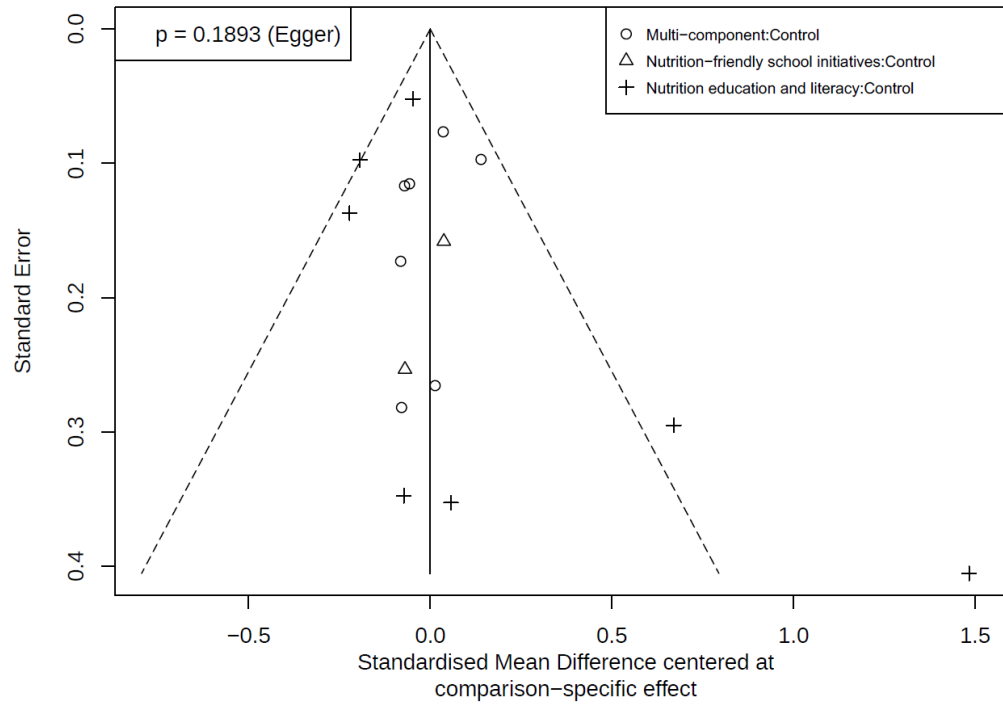

**Supplementary Figure 17:** Comparison adjusted funnel plot for vegetable intake

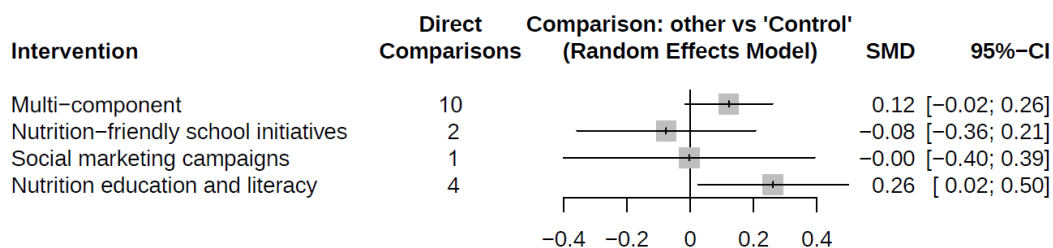

**Supplementary Figure 18:** Forest plot fruit and vegetable intake (standardised mean difference)

CI=confidence interval; SMD=standardised mean difference;

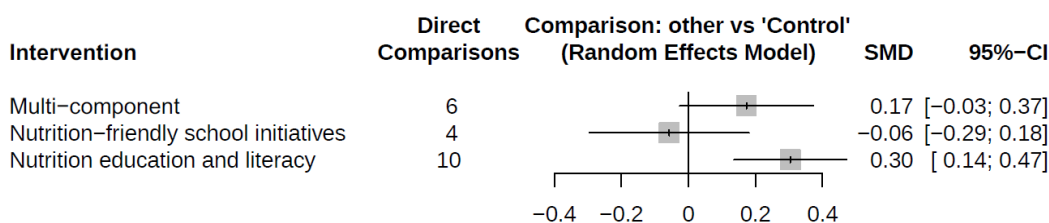

**Supplementary Figure 19:** Forest plot fruit intake (standardised mean difference)

CI=confidence interval; SMD=standardised mean difference;

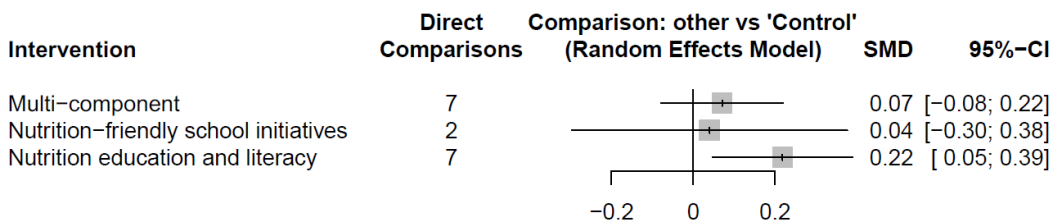

**Supplementary Figure 20:** Forest plot vegetable intake (standardised mean difference)

CI=confidence interval; SMD=standardised mean difference;

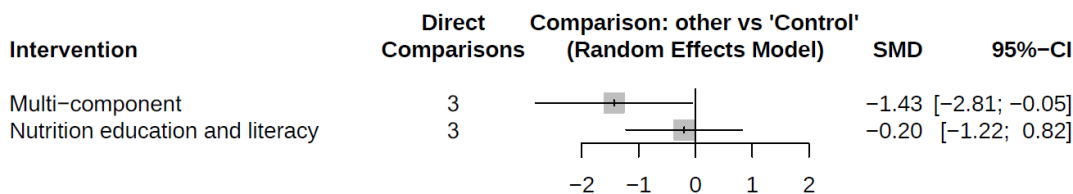

**Supplementary Figure 21:** Forest plot fat intake (standardised mean difference)

CI=confidence interval; SMD=standardised mean difference;

## Supplemental References

1. de Onis M, Onyango AW, Borghi E, et al. Development of a WHO growth reference for school-aged children and adolescents. *Bull World Health Organ* 2007;85(9):660-7. doi: 10.2471/blt.07.043497
2. De Onis M. World Health Organization Reference Curves. In *ECOG eBook on Child and Adolescent Obesity* [Frelut, ML, editor]. Geneva: WHO 2015. <https://ebook.ecog-obesity.eu/chapter-growth-charts-body-composition/world-health-organization-reference-curves/> (accessed 22 July 2022).
3. Center for Disease Control and Prevention. Defining Childhood Overweight and Obesity 2018. <https://www.cdc.gov/obesity/childhood/defining.html> (accessed 28 October 2020).
4. Cole TJ, Bellizzi MC, Flegal KM, Dietz WH. Establishing a standard definition for child overweight and obesity worldwide: international survey. *Bmj* 2000;320(7244):1240-3. doi: 10.1136/bmj.320.7244.1240
5. Alvirde-Garcia U, Rodriguez-Guerrero AJ, Henao-Moran S, Gomez-Perez FJ, Aguilar-Salinas CA. [Results of a community-based life style intervention program for children]. *Salud Publica Mex* 2013;55 Suppl 3:406-14.
6. Bessems KMH, van Assema P, Martens MK, et al. Healthier food choices as a result of the revised healthy diet programme Krachtvoer for students of prevocational schools. *International Journal of Behavioral Nutrition and Physical Activity* 2012;9 doi: 10.1186/1479-5868-9-60
7. Bogart LM, Elliott MN, Cowgill BO, et al. Two-Year BMI Outcomes From a School-Based Intervention for Nutrition and Exercise: A Randomized Trial. *Pediatrics* 2016;137(5) doi: 10.1542/peds.2015-2493
8. Ghaffari M, Rakhshanderou S, Mehrabi Y, Ramezankhani A, Shahbazzadegan B. Effect of Theory-Based Environmental-Behavioral Interventions With Student-Family-School Approach on Fruit and Vegetable Consumption Among the Adolescents. *Crescent J Med Biol Sci* 2019;6(3):300-08.
9. Keihner A, Rosen N, Wakimoto P, et al. Impact of California Children's Power Play! Campaign on Fruit and Vegetable Intake and Physical Activity among Fourth- and Fifth-Grade Students. *American Journal of Health Promotion* 2017;31(3):189-91. doi: 10.4278/ajhp.141125-ARB-592
10. Shamah Levy T, Morales Ruan C, Amaya Castellanos C, et al. Effectiveness of a diet and physical activity promotion strategy on the prevention of obesity in Mexican school children. *BMC Public Health* 2012;12:152. doi: 10.1186/1471-2458-12-152
11. van den Berg A, Warren JL, McIntosh A, et al. Impact of a Gardening and Physical Activity Intervention in Title 1 Schools: The TGEG Study. *Child Obes* 2020;16(S1):S44-S54. doi: 10.1089/chi.2019.0238
12. Adab P, Pallan MJ, Cade J, et al. Preventing childhood obesity, phase II feasibility study focusing on South Asians: BEACHes. *Bmj Open* 2014;4(4) doi: 10.1136/bmjopen-2013-004579

13. Alaimo K, Oleksyk SC, Drzal NB, et al. Effects of changes in lunch-time competitive foods, nutrition practices, and nutrition policies on low-income middle-school children's diets. *Child Obes* 2013;9(6):509-23. doi: 10.1089/chi.2013.0052
14. Amaro S, Viggiano A, Di Costanzo A, et al. Kaledo, a new educational board-game, gives nutritional rudiments and encourages healthy eating in children: a pilot cluster randomized trial. *Eur J Pediatr* 2006;165(9):630-5. doi: 10.1007/s00431-006-0153-9
15. Arcan C, Kubik MY, Fulkerson JA, Hannan PJ, Story M. Substance use and dietary practices among students attending alternative high schools: results from a pilot study. *Bmc Public Health* 2011;11 doi: 10.1186/1471-2458-11-263
16. Arrizabalaga-Lopez M, de Jauregui DRF, Portillo MD, et al. A theory-based randomized controlled trial in promoting fruit and vegetable intake among schoolchildren: PROFRUVE study. *European Journal of Nutrition* 2020 doi: 10.1007/s00394-020-02185-5
17. Ask AS, Hernes S, Aarek I, Johannessen G, Haugen M. Changes in dietary pattern in 15 year old adolescents following a 4 month dietary intervention with school breakfast - a pilot study. *Nutrition Journal* 2006;5 doi: 10.1186/1475-2891-5-33
18. Benito-Ostolaza JM, Echavarri R, Garcia-Prado A, Osés-Eraso N. Using visual stimuli to promote healthy snack choices among children. *Soc Sci Med* 2021;270:113587. doi: 10.1016/j.socscimed.2020.113587
19. Bryan CJ, Yeager DS, Hinojosa CP. A values-alignment intervention protects adolescents from the effects of food marketing. *Nat Hum Behav* 2019;3(6):596-603. doi: 10.1038/s41562-019-0586-6
20. Bukhari A, Fredericks L, Wylie-Rosett J. Strategies to promote high school students' healthful food choices. *J Nutr Educ Behav* 2011;43(5):414-8. doi: 10.1016/j.jneb.2011.01.008
21. Caraher M, Seeley A, Wu M, Lloyd S. When chefs adopt a school? An evaluation of a cooking intervention in English primary schools. *Appetite* 2013;62:50-59. doi: 10.1016/j.appet.2012.11.007
22. Chamberland K, Sanchez M, Panahi S, et al. The impact of an innovative web-based school nutrition intervention to increase fruits and vegetables and milk and alternatives in adolescents: a clustered randomized trial. *Int J Behav Nutr Phys Act* 2017;14(1):140. doi: 10.1186/s12966-017-0595-7
23. Chellappah J, Tonkin A, Gregg MED, Reid C. A pilot study of effects of fruit intake on cardiovascular risk factors in children. *Journal of Molecular and Cellular Cardiology* 2012;40(6):866.
24. Cohen JF, Smit LA, Parker E, et al. Long-term impact of a chef on school lunch consumption: findings from a 2-year pilot study in Boston middle schools. *J Acad Nutr Diet* 2012;112(6):927-33. doi: 10.1016/j.jand.2012.01.015
25. Cunha DB, de Souza BDN, Pereira RA, Sichieri R. Effectiveness of a Randomized School-Based Intervention Involving Families and Teachers to Prevent Excessive Weight Gain among Adolescents in Brazil. *Plos One* 2013;8(2) doi: 10.1371/journal.pone.0057498
26. Damsgaard CT, Dalskov SM, Laursen RP, et al. Provision of healthy school meals does not affect the metabolic syndrome score in 8-11-year-old children, but reduces cardiometabolic risk markers despite increasing waist circumference. *British Journal of Nutrition* 2014;112(11):1826-36. doi: 10.1017/S0007114514003043

27. Danielzik S, Pust S, Muller MJ. School-based interventions to prevent overweight and obesity in prepubertal children: process and 4-years outcome evaluation of the Kiel Obesity Prevention Study (KOPS). *Acta Paediatrica* 2007;96:19-25. doi: 10.1111/j.1651-2227.2007.00165.x
28. de Moraes MM, Mediano MFF, de Souza RAG, et al. Discouraging soft drink consumption reduces blood glucose and cholesterol of Brazilian elementary students: Secondary analysis of a randomized controlled trial. *Prev Med* 2017;100:223-28. doi: 10.1016/j.ypmed.2017.04.035
29. DeVault N, Kennedy T, Hermann J, et al. It's All About Kids: Preventing Overweight in Elementary School Children in Tulsa, OK. *Journal of the American Dietetic Association* 2009;109(4):680-87. doi: 10.1016/j.jada.2008.12.021
30. Donnelly JE, Jacobsen DJ, Whatley JE, et al. Nutrition and physical activity program to attenuate obesity and promote physical and metabolic fitness in elementary school children. *Obesity Research* 1996;4(3):229-43.
31. Drapeau V, Savard M, Gallant A, Nadeau L, Gagnon J. The Effectiveness of A School-Based Nutrition Intervention on Children's Fruit, Vegetables, and Dairy Product Intake. *J Sch Health* 2016;86(5):353-62. doi: 10.1111/josh.12385
32. Duncan S, McPhee JC, Schluter PJ, et al. Efficacy of a compulsory homework programme for increasing physical activity and healthy eating in children: the healthy homework pilot study. *Int J Behav Nutr Phys Act* 2011;8(- 127):127. doi: 10.1186/1479-5868-8-127
33. Dunton GF, Liao Y, Grana R, et al. State-wide dissemination of a school-based nutrition education programme: a RE-AIM (Reach, Efficacy, Adoption, Implementation, Maintenance) analysis. *Public Health Nutr* 2014;17(2):422-30. doi: 10.1017/S1368980012005186
34. Eboh LO, Boye TE. Nutrition knowledge and food choices of primary school pupils in the Niger-Delta Region Nigeria. *Pak J Nutr* 2006;5(4):308-11.
35. El Harake MD, Kharroubi S, Hamadeh SK, Jomaa L. Impact of a Pilot School-Based Nutrition Intervention on Dietary Knowledge, Attitudes, Behavior and Nutritional Status of Syrian Refugee Children in the Bekaa, Lebanon. *Nutrients* 2018;10(7)
36. Eriksen K, Haraldsdóttir J, Pederson R, Flyger HV. Effect of a fruit and vegetable subscription in Danish schools. *Public Health Nutr* 2003;6(1):57-63. doi: 10.1079/phn2002356
37. Fassnacht DB, Ali K, Silva C, Goncalves S, Machado PPP. Use of Text Messaging Services to Promote Health Behaviors in Children. *Journal of Nutrition Education and Behavior* 2015;47(1):75-80. doi: 10.1016/j.jneb.2014.08.006
38. Figueroa-Piña DG, Chávez-Servín JL, de la Torre-Carbot K, et al. Evaluation of the effect of a school garden as an educational didactic tool in vegetable and fruit consumption in teenagers. *Nutr Res Pract* 2021;15(2):235-47. doi: 10.4162/nrp.2021.15.2.235
39. Frenn M, Malin S, Bansal NK. Stage-based interventions for low-fat diet with middle school students. *J Pediatr Nurs* 2003;18(1):36-45. doi: 10.1053/jpdn.2003.6
40. Gratton L, Povey R, Clark-Carter D. Promoting children's fruit and vegetable consumption: interventions using the Theory of Planned Behaviour as a framework. *British Journal of Health Psychology* 2007;12(Pt 4):639-50.
41. Hanbazaza MA, Triador L, Ball GD, et al. The Impact of School Gardening on Cree Children's Knowledge and Attitudes toward Vegetables and Fruit. *Can J Diet Pract Res* 2015;76(3):133-9. doi: 10.3148/cjdpr-2015-007



42. Hatzis CM, Papandreou C, Kafatos AG. School health education programs in Crete: evaluation of behavioural and health indices a decade after initiation. *Prev Med* 2010;51(3-4):262-7. doi: 10.1016/j.ypmed.2010.05.015
43. Hendy HM, Williams KE, Camise TS. "Kids Choice" school lunch program increases children's fruit and vegetable acceptance. *Appetite* 2005;45(3):250-63. doi: 10.1016/j.appet.2005.07.006
44. Hopper CA, Munoz KD, Gruber MB, et al. A school-based cardiovascular exercise and nutrition program with parent participation: An evaluation study. *Children's Health Care* 1996;25(3):221-35. doi: 10.1207/s15326888chc2503\_5
45. Hovdenak IM, Stea TH, Twisk J, et al. Tracking of fruit, vegetables and unhealthy snacks consumption from childhood to adulthood (15 year period): Does exposure to a free school fruit programme modify the observed tracking? *International Journal of Behavioral Nutrition and Physical Activity* 2019;16(1):1-10.
46. James J, Thomas P, Cavan D, Kerr D. Preventing childhood obesity by reducing consumption of carbonated drinks: Cluster randomised controlled trial. *BMJ* 2004;328(7450)
47. James J, Thomas P, Kerr D. Preventing childhood obesity: two year follow-up results from the Christchurch obesity prevention programme in schools (CHOPPS). *BMJ* 2007;335(7623)
48. Jenkins KT, Benton D, Tapper K, Murphy S, Moore L. A cross-sectional observational study of the nutritional intake of UK primary school children from deprived and non-deprived backgrounds: implications for school breakfast schemes. *Int J Behav Nutr Phys Act* 2015;12(1):86. doi: 10.1186/s12966-015-0238-9
49. Jensen BW, von Kappelgaard LM, Nielsen BM, et al. Intervention effects on dietary intake among children by maternal education level: results of the Copenhagen School Child Intervention Study (CoSCIS). *British Journal of Nutrition* 2015;113(6):963-74. doi: 10.1017/S0007114515000021
50. Johnston CA, Moreno JP, Gallagher MR, et al. Achieving long-term weight maintenance in Mexican-American adolescents with a school-based intervention. *J Adolesc Health* 2013;53(3):335-41. doi: 10.1016/j.jadohealth.2013.04.001
51. Johnston CA, Tyler C, Fullerton G, et al. Results of an intensive school-based weight loss program with overweight Mexican American children. *International Journal of Pediatric Obesity* 2007;2(3):144-52.
52. Johnston CA, Tyler C, McFarlin BK, et al. Effects of a school-based weight maintenance program for Mexican-American children: results at 2 years. *Obesity* 2010;18(3):542-47.
53. Jones E, Zuest L, Bulger S, et al. Initial Findings of a Multicomponent School Health Intervention in Rural Appalachia: The Greenbrier CHOICES Project. *Health Education & Behavior* 2020;47(2):332-43. doi: 10.1177/1090198119897612
54. Kain J, Uauy R, Leyton B, et al. [Effectiveness of a dietary and physical activity intervention to prevent obesity in school age children]. *Rev Med Chil* 2008;136(1):22-30. doi: /S0034-98872008000100003
55. Karczewski SA, Carter JS, DeCator DD. The Role of Ethnicity in School-Based Obesity Intervention for School-Aged Children: A Pilot Evaluation. *Journal of School Health* 2016;86(11):778-86. doi: 10.1111/josh.12433

56. Karimi-Shahanjarini A, Rashidian A, Omidvar N, Majdzadeh R. Assessing and comparing the short-term effects of TPB only and TPB plus implementation intentions interventions on snacking behavior in Iranian adolescent girls: a cluster randomized trial. *Am J Health Promot* 2013;27(3):152-61. doi: 10.4278/ajhp.110311-QUAN-113
57. Kim K, Hong SA, Yun SH, et al. The effect of a healthy school tuck shop program on the access of students to healthy foods. *Nutr Res Pract* 2012;6(2):138-45. doi: 10.4162/nrp.2012.6.2.138
58. Lane H, Porter KJ, Hecht E, et al. Kids SIP smartER: a Feasibility Study to Reduce Sugar-Sweetened Beverage Consumption Among Middle School Youth in Central Appalachia. *American Journal of Health Promotion* 2018;32(6):1386-401.
59. Lansky D, Vance MA. School-based intervention for adolescent obesity: analysis of treatment, randomly selected control, and self-selected control subjects. *J Consult Clin Psychol* 1983;51(1):147-8. doi: 10.1037//0022-006x.51.1.147
60. Larsen AL, Robertson T, Dunton G. RE-AIM analysis of a randomized school-based nutrition intervention among fourth-grade classrooms in California. *Translational Behavioral Medicine* 2015;5(3):315-26.
61. Lazzeri G, Pilato V, Pammolli A, et al. Promotion of fruits and vegetables consumption: results of a school-based intervention in a sample of 13-15 years old Italian students. *International Journal of Health and Nutrition* 2013;2(4):326-34.
62. Lien N, Haerens L, te Velde SJ, et al. Exploring subgroup effects by socioeconomic position of three effective school-based dietary interventions: the European TEENAGE project. *International journal of public health* 2014;59(3):493-502.
63. Loughridge JL, Barratt J. Does the provision of cooled filtered water in secondary school cafeterias increase water drinking and decrease the purchase of soft drinks? *Journal of human nutrition and dietetics* 2005;18(4):281-86.
64. Lynch BA, Gentile N, Maxson J, et al. Elementary School-Based Obesity Intervention Using an Educational Curriculum. *Journal of primary care & community health* 2016;7(4):265-71.
65. Madden AM, Harrex R, Radalowicz J, et al. A kitchen-based intervention to improve nutritional intake from school lunches in children aged 12-16years. *Journal of Human Nutrition and Dietetics* 2013;26(3):243-51. doi: 10.1111/jhn.12037
66. Maes L, Cook TL, Ottovaere C, et al. Pilot evaluation of the HELENA (Healthy Lifestyle in Europe by Nutrition in Adolescence) Food-O-Meter, a computer-tailored nutrition advice for adolescents: a study in six European cities. *Public Health Nutr* 2011;14(7):1292-302. doi: 10.1017/S1368980010003563
67. Mangunkusumo RT, Brug J, de Koning HJ, van der Lei J, Raat H. School-based internet-tailored fruit and vegetable education combined with brief counselling increases children's awareness of intake levels. *Public Health Nutr* 2007;10(3):273-9. doi: 10.1017/S1368980007246671
68. McAleese JD, Rankin LL. Garden-based nutrition education affects fruit and vegetable consumption in sixth-grade adolescents. *J Am Diet Assoc* 2007;107(4):662-5. doi: 10.1016/j.jada.2007.01.015
69. Melnyk BM, Small L, Morrison-Beedy D, et al. The COPE Healthy Lifestyles TEEN program: feasibility, preliminary efficacy, & lessons learned from an after school group intervention with overweight adolescents. *J Pediatr Health Care* 2007;21(5):315-22. doi: 10.1016/j.pedhc.2007.02.009

70. Muckelbauer R, Libuda L, Clausen K, Reinehr T, Kersting M. A simple dietary intervention in the school setting decreased incidence of overweight in children. *Obes Facts* 2009;2(5):282-5. doi: 10.1159/000229783
71. Muckelbauer R, Libuda L, Clausen K, et al. Promotion and provision of drinking water in schools for overweight prevention: randomized, controlled cluster trial. *Pediatrics* 2009;123(4):e661-7. doi: 10.1542/peds.2008-2186
72. Muckelbauer R, Libuda L, Clausen K, et al. Immigrational background affects the effectiveness of a school-based overweight prevention program promoting water consumption. *Obesity* 2010;18(3):528-34.
73. Muth ND, Chatterjee A, Williams D, Cross A, Flower K. Making an IMPACT: effect of a school-based pilot intervention. *N C Med J* 2008;69(6):432-40.
74. Narayanan N, Nagpal N, Zieve H, et al. A School-Based Intervention Using Health Mentors to Address Childhood Obesity by Strengthening School Wellness Policy. *Preventing Chronic Disease* 2019;16(- 11) doi: 10.5888/pcd16.190054
75. Oosthuizen D, Oldewage-Theron WH, Napier C. The impact of a nutrition programme on the dietary intake patterns of primary school children. *South African Journal of Clinical Nutrition* 2011;24(2):75-81.
76. Prelip M, Slusser W, Thai CL, Kinsler J, Erausquin JT. Effects of a school-based nutrition program diffused throughout a large urban community on attitudes, beliefs, and behaviors related to fruit and vegetable consumption. *Journal of School Health* 2011;81(9):520-29.
77. Prelip M, Kinsler J, Thai CL, Erausquin JT, Slusser W. Evaluation of a school-based multicomponent nutrition education program to improve young children's fruit and vegetable consumption. *J Nutr Educ Behav* 2012;44(4):310-8. doi: 10.1016/j.jneb.2011.10.005
78. Rappaport EB, Daskalakis C, Sendekci JA. Using routinely collected growth data to assess a school-based obesity prevention strategy. *International Journal of Obesity* 2013;37(1):79-85. doi: 10.1038/ijo.2012.126
79. Rees G, Bakhshi S, Surujlal-Harry A, Stasinopoulos M, Baker A. A computerised tailored intervention for increasing intakes of fruit, vegetables, brown bread and wholegrain cereals in adolescent girls. *Public Health Nutr* 2010;13(8):1271-8. doi: 10.1017/S1368980009992953
80. Reinaerts E, Crutzen R, Candel M, De Vries NK, De Nooijer J. Increasing fruit and vegetable intake among children: comparing long-term effects of a free distribution and a multicomponent program. *Health Education Research* 2008;23(6):987-96.
81. Reinaerts E, de Nooijer J, Candel M, de Vries N. Increasing children's fruit and vegetable consumption: distribution or a multicomponent programme? *Public Health Nutr* 2007;10(9):939-47. doi: 10.1017/S1368980007665495
82. Rerksuppaphol L, Rerksuppaphol S. Internet Based Obesity Prevention Program for Thai School Children- A Randomized Control Trial. *J Clin Diagn Res* 2017;11(3):SC07-SC11. doi: 10.7860/JCDR/2017/21423.9368
83. Rosado JL, Arellano MD, Montemayor K, Garcia OP, Caamano MD. An increase of cereal intake as an approach to weight reduction in children is effective only when accompanied by nutrition education: a randomized controlled trial. *Nutrition Journal* 2008;7 doi: 10.1186/1475-2891-7-28

84. Rosemond TN, Blake CE, Jenkins KA, Buff SM, Moore JB. Dietary Improvements Among African American Youth: Results of an Interactive Nutrition Promotion Program. *American Journal of Health Education* 2015;46(1):40-47. doi: 10.1080/19325037.2014.977409
85. Rosenbaum M, Nonas C, Weil R, et al. School-based intervention acutely improves insulin sensitivity and decreases inflammatory markers and body fatness in junior high school students. *J Clin Endocrinol Metab* 2007;92(2):504-8. doi: 10.1210/jc.2006-1516
86. Rosettie KL, Micha R, Cudhea F, et al. Comparative risk assessment of school food environment policies and childhood diets, childhood obesity, and future cardiometabolic mortality in the United States. *PLoS One* 2018;13(7):e0200378. doi: 10.1371/journal.pone.0200378
87. Rush E, McLennan S, Obolonkin V, et al. Project Energize: whole-region primary school nutrition and physical activity programme; evaluation of body size and fitness 5 years after the randomised controlled trial. *British Journal of Nutrition* 2014;111(2):363-71. doi: 10.1017/s0007114513002316
88. Santalo MI, Gibbons S, Naylor PJ. Using food models to enhance sugar literacy among older adolescents: evaluation of a brief experiential nutrition education intervention. *Nutrients* 2019;11(8):1763.
89. Schwartz AE, Leardo M, Aneja S, Elbel B. Effect of a School-Based Water Intervention on Child Body Mass Index and Obesity. *Jama Pediatrics* 2016;170(3):220-26. doi: 10.1001/jamapediatrics.2015.3778
90. Sichieri R, Paula Trotte A, de Souza RA, Veiga GV. School randomised trial on prevention of excessive weight gain by discouraging students from drinking sodas. *Public Health Nutr* 2009;12(2):197-202. doi: 10.1017/S1368980008002644
91. Siegel R, Lockhart MK, Barnes AS, et al. Small prizes increased healthful school lunch selection in a Midwestern school district. *Applied Physiology Nutrition and Metabolism* 2016;41(4):370-74.
92. Simons-Morton BG, Parcel GS, Baranowski T, Forthofer R, O'Hara NM. Promoting physical activity and a healthful diet among children: results of a school-based intervention study. *American Journal of Public Health* 1991;81(8):986-91.
93. Spears-Lanoix EC, McKyer ELJ, Evans A, et al. Using Family-Focused Garden, Nutrition, and Physical Activity Programs To Reduce Childhood Obesity: The Texas! Go! Eat! Grow! Pilot Study. *Childhood Obesity* 2015;11(6):707-14. doi: 10.1089/chi.2015.0032
94. Speroni KG, Earley C, Atherton M. Evaluating the effectiveness of the Kids Living Fit program: a comparative study. *The Journal of school nursing* 2007;23(6):329-36.
95. Spiegel SA, Foulk D. Reducing overweight through a multidisciplinary school-based intervention. *Obesity* 2006;14(1):88-96.
96. Stock S, Miranda C, Evans S, et al. Healthy Buddies: a novel, peer-led health promotion program for the prevention of obesity and eating disorders in children in elementary school. *Pediatrics* 2007;120(4):e1059-68. doi: 10.1542/peds.2006-3003
97. Takacs H, Martos E, Kovacs VA. Effects of a practice-focused nutrition intervention in Hungarian adolescents. *Ann Ist Super Sanita* 2020;56(1):99-106. doi: 10.4415/ann\_20\_01\_14

98. Tavassoli E, Ramezankhani A, Mirmiran P, Mehrabi Y. Evaluation of a school program aimed at the prevention of obesity in high school girl students: a theory based intervention study. *American-Eurasian Journal of Agriculture and Environmental Sciences* 2014;14(4):314-21.
99. Taylor RW, McAuley KA, Barbezat W, et al. APPLE project: 2-y findings of a community-based obesity prevention program in primary school-age children. *The American journal of clinical nutrition* 2007;86(3):735-42.
100. Thompson V, Cullen KW, Watson KB, Zakeri I. The increased availability and marketing of fruit, juice, and vegetables to middle school students increases consumption. *J Child Nutr Manag (Online)* 2007;31(1)
101. Tsorbatzoudis H. Evaluation of a planned behavior theory-based intervention programme to promote healthy eating. *Percept Mot Skills* 2005;101(2):587-604. doi: 10.2466/pms.101.2.587-604
102. van Nassau F, Singh AS, Cerin E, et al. The Dutch Obesity Intervention in Teenagers (DOiT) cluster controlled implementation trial: intervention effects and mediators and moderators of adiposity and energy balance-related behaviours. *Int J Behav Nutr Phys Act* 2014;11:158. doi: 10.1186/s12966-014-0158-0
103. Vilchis-Gil J, Klunder-Klunder M, Flores-Huerta S. Effect on the Metabolic Biomarkers in Schoolchildren After a Comprehensive Intervention Using Electronic Media and In-Person Sessions to Change Lifestyles: community Trial. *Journal of Medical Internet Research* 2018;20(2) doi: 10.2196/jmir.9052
104. Visscher TL, van Hal WC, Blokdijk L, et al. Feasibility and impact of placing water coolers on sales of sugar-sweetened beverages in Dutch secondary school canteens. *Obes Facts* 2010;3(2):109-15. doi: 10.1159/000300848
105. Wadolowska L, Hamulka J, Kowalkowska J, et al. Changes in Sedentary and Active Lifestyle, Diet Quality and Body Composition Nine Months after an Education Program in Polish Students Aged 11-12 Years: report from the ABC of Healthy Eating Study. *Nutrients* 2019;11(2):331.
106. Warren JM, Henry CJK, Lightowler HJ, Bradshaw SM, Perwaiz S. Evaluation of a pilot school programme aimed at the prevention of obesity in children. *Health promotion international* 2003;18(4):287-96. doi: 10.1093/heapro/dag402
107. Werch CE, Bian H, Carlson JM, et al. Brief integrative multiple behavior intervention effects and mediators for adolescents. *Journal of behavioral medicine* 2011;34(1):3-12. doi: 10.1007/s10865-010-9281-9
108. Whitaker RC, Wright JA, Koepsell TD, Finch AJ, Psaty BM. Randomized intervention to increase children's selection of low-fat foods in school lunches. *J Pediatr* 1994;125(4):535-40. doi: 10.1016/s0022-3476(94)70004-4
109. Whittemore R, Jeon S, Grey M. An Internet Obesity Prevention Program for Adolescents. *Journal of Adolescent Health* 2013;52(4):439-47. doi: 10.1016/j.jadohealth.2012.07.014
110. Williams PA, Cates SC, Blitstein JL, et al. Evaluating the impact of six supplemental nutrition assistance program education interventions on children's at-home diets. *Health Education & Behavior* 2015;42(3):329-38. doi: 10.1177/1090198114558589

111. Worsley A, Coonan W, Worsley A. The First Body Owner's Programme: An integrated school-based physical and nutrition education programme. *Health Promotion international* 1987;2(1):39-50. doi: 10.1093/heapro/2.1.39
112. Zhou WJ, Xu XL, Li G, et al. Effectiveness of a school-based nutrition and food safety education program among primary and junior high school students in Chongqing, China. *Global Health Promotion* 2016;23(1):37-49. doi: 10.1177/1757975914552914
113. Zive MM, Pelletier RL, Sallis JF, Elder JP. An environmental intervention to improve a la carte foods at middle schools. *Journal of the American Dietetic Association* 2002;102(3):S76-S78. doi: Doi 10.1016/S0002-8223(02)90427-X
114. ACTRN12607000257460. It's Your Move! A community-based obesity prevention study in secondary school children [cited 2021 Sep 01]. Available from: <https://anzctr.org.au/ACTRN12607000257460.aspx>, 2007.
115. ACTRN12618001550291. Educational intervention to increase water consumption in school children from Zapopan, Mexico [cited 2021 Sep 01]. Available from: <http://www.anzctr.org.au/ACTRN12618001550291.aspx>, 2018.
116. DRKS00017317. Leipzig school nutrition study [cited 2021 Sep 01]. Available from: <http://www.drks.de/DRKS00017317>, 2019.
117. NCT00995267. Eating Habits and Obesity in First and Second Grade School Children [cited 2021 Sep 01]. Available from: <https://ClinicalTrials.gov/show/NCT00995267>, 2008.
118. NCT02017158. Virtual Sprouts: Web-based Gardening Games to Teach Nutrition and Combat Obesity [cited 2021 Sep 01]. Available from: <https://ClinicalTrials.gov/show/NCT02017158>, 2011.
119. NCT04319003. Pilot Sugar Reduction Intervention in Kiribati Teenagers [cited 2021 Sep 01]. Available from: <https://ClinicalTrials.gov/show/NCT04319003>, 2018.
120. UMIN000032914. Evaluation of Healthy Lifestyle Program for primary school children in Batu Pahat District, Johor State, Malaysia [cited 2021 Sep 01]. Available from: [https://upload.umin.ac.jp/cgi-open-bin/ctr\\_e/ctr\\_view.cgi?recptno=R000037525](https://upload.umin.ac.jp/cgi-open-bin/ctr_e/ctr_view.cgi?recptno=R000037525), 2018.
121. Adab P, Barrett T, Bhopal R, et al. The West Midlands ActiVe lifestyle and healthy Eating in School children (WAVES) study: a cluster randomised controlled trial testing the clinical effectiveness and cost-effectiveness of a multifaceted obesity prevention intervention programme targeted at children aged 6-7 years. *Health Technology Assessment* 2018;22(8) doi: 10.3310/hta22080
122. Adab P, Pallan MJ, Lancashire ER, et al. Effectiveness of a childhood obesity prevention programme delivered through schools, targeting 6 and 7 year olds: cluster randomised controlled trial (WAVES study). *BMJ* 2018;360 doi: 10.1136/bmj.k211
123. Akdemir M, Donmez L, Polat H. The Effect of Nutritional and Physical Activity Interventions on Nutritional Status and Obesity in Primary School Children: A Cluster Randomized Controlled Study. *Kuwait Medical Journal* 2017;49(2):105-13.
124. Anderson EL, Howe LD, Kipping RR, et al. Long-term effects of the Active for Life Year 5 (AFLY5) school-based cluster-randomised controlled trial. *BMJ Open* 2016;6(11):e010957. doi: 10.1136/bmjopen-2015-010957

125. Angelopoulos PD, Milionis HJ, Grammatikaki E, Moschonis G, Manios Y. Changes in BMI and blood pressure after a school based intervention: the CHILDREN study. *European Journal of Public Health* 2009;19(3):319-25. doi: 10.1093/eurpub/ckp004
126. Bacardi-Gascon M, Perez-Morales ME, Jimenez-Cruz A. A six month randomized school intervention and an 18-month follow-up intervention to prevent childhood obesity in Mexican elementary schools. *Nutr Hosp* 2012;27(3):755-62. doi: 10.3305/nh.2012.27.3.5756
127. Barco Leme AC, Philippi ST, Fisberg RM. Changes in diet quality 6 and 12 months post-intervention: the Healthy Habits, Healthy Girls: a Brazilian study. *Revista De Nutricao-Brazilian Journal of Nutrition* 2020;33 doi: 10.1590/1678-9865202033e190184
128. Berry DC, Schwartz TA, McMurray RG, et al. The family partners for health study: a cluster randomized controlled trial for child and parent weight management. *Nutrition & Diabetes* 2014;4 doi: 10.1038/nutd.2013.42
129. Bjelland M, Bergh IH, Grydeland M, et al. Changes in adolescents' intake of sugar-sweetened beverages and sedentary behaviour: Results at 8 month mid-way assessment of the HEIA study - a comprehensive, multi-component school-based randomized trial. *International Journal of Behavioral Nutrition and Physical Activity* 2011;8 doi: 10.1186/1479-5868-8-63
130. Bjelland M, Hausken SE, Bergh IH, et al. Changes in adolescents' and parents' intakes of sugar-sweetened beverages, fruit and vegetables after 20 months: results from the HEIA study - a comprehensive, multi-component school-based randomized trial. *Food Nutr Res* 2015;59:25932. doi: 10.3402/fnr.v59.25932
131. Bonsergent E, Agrinier N, Thilly N, et al. Overweight and obesity prevention for adolescents: a cluster randomized controlled trial in a school setting. *Am J Prev Med* 2013;44(1):30-9. doi: 10.1016/j.amepre.2012.09.055
132. Bonvecchio-Arenas A, Theodore FL, Hernandez-Cordero S, et al. The school as an opportunity for obesity prevention: An experience from the Mexican school system. *Revista Espanola De Nutricion Comunitaria-Spanish Journal of Community Nutrition* 2010;16(1):13-16. doi: 10.1016/s1135-3074(10)70005-3
133. Brandstetter S, Klenk J, Berg S, et al. Overweight prevention implemented by primary school teachers: a randomised controlled trial. *Obes Facts* 2012;5(1):1-11. doi: 10.1159/000336255
134. Briancon S, Legrand K, Muller L, et al. Effectiveness of a socially adapted intervention in reducing social inequalities in adolescence weight. The PRALIMAP-INES school-based mixed trial. *Int J Obes (Lond)* 2020;44(4):895-907. doi: 10.1038/s41366-020-0520-z
135. Brito Beck da Silva K, Leovigildo Fiaccone R, Couto RD, Ribeiro-Silva Rde C. EVALUATION OF THE EFFECTS OF A PROGRAMME PROMOTING ADEQUATE AND HEALTHY EATING ON ADOLESCENT HEALTH MARKERS: AN INTERVENTIONAL STUDY. *Nutr Hosp* 2015;32(4):1582-90. doi: 10.3305/nh.2015.32.4.9512
136. Caballero B, Clay T, Davis SM, et al. Pathways: a school-based, randomized controlled trial for the prevention of obesity in American Indian schoolchildren. *The American journal of clinical nutrition* 2003;78(5):1030-38. doi: 10.1093/ajcn/78.5.1030
137. Cao Z, Hua J, Zhang D, Thapa JR, Wang S. A cohort study assessing the sustainable long-term effectiveness of a childhood-obesity intervention in China. *International journal of epidemiology* 2019;48(1):108-15. doi: 10.1093/ije/dyy145

138. Cao ZJ, Wang SM, Chen Y. A randomized trial of multiple interventions for childhood obesity in China. *Am J Prev Med* 2015;48(5):552-60. doi: 10.1016/j.amepre.2014.12.014
139. Christian MS, Evans CE, Nykjaer C, Hancock N, Cade JE. Evaluation of the impact of a school gardening intervention on children's fruit and vegetable intake: a randomised controlled trial. *Int J Behav Nutr Phys Act* 2014;11:99. doi: 10.1186/s12966-014-0099-7
140. Christian MS, Evans CE, Ransley JK, et al. Process evaluation of a cluster randomised controlled trial of a school-based fruit and vegetable intervention: Project Tomato. *Public Health Nutr* 2012;15(3):459-65. doi: 10.1017/S1368980011001844
141. Cohen JF, Kraak VI, Choumenkovitch SF, Hyatt RR, Economos CD. The CHANGE study: a healthy-lifestyles intervention to improve rural children's diet quality. *J Acad Nutr Diet* 2014;114(1):48-53. doi: 10.1016/j.jand.2013.08.014
142. Colin-Ramirez E, Castillo-Martinez L, Orea-Tejeda A, Vergara A, Villa AR. Impact of a school-based intervention to cardiovascular risk factors prevention (RESCATE) on physical activity and diet in Mexican children aged 8-10 years. *Revista Espanola De Nutricion Comunitaria-Spanish Journal of Community Nutrition* 2009;15(2):71-80.
143. Collins CE, Dewar DL, Schumacher TL, et al. 12 month changes in dietary intake of adolescent girls attending schools in low-income communities following the NEAT Girls cluster randomized controlled trial. *Appetite* 2014;73:147-55. doi: 10.1016/j.appet.2013.11.003
144. Contento IR, Koch PA, Lee H, Calabrese-Barton A. Adolescents demonstrate improvement in obesity risk behaviors after completion of choice, control & change, a curriculum addressing personal agency and autonomous motivation. *J Am Diet Assoc* 2010;110(12):1830-9. doi: 10.1016/j.jada.2010.09.015
145. Cullen KW, Chen TA, Dave JM, Jensen H. Differential Improvements in Student Fruit and Vegetable Selection and Consumption in Response to the New National School Lunch Program Regulations: A Pilot Study. *J Acad Nutr Diet* 2015;115(5):743-50. doi: 10.1016/j.jand.2014.10.021
146. Dagger RM, Davies IG, Mackintosh KA, et al. The CHANGE! Project: Changes in Body Composition and Cardiorespiratory Fitness in 10- to 11-Year-Old Children After Completing the CHANGE! Intervention. *Pediatr Exerc Sci* 2018;30(1):81-89. doi: 10.1123/pes.2015-0200
147. de Visser R, Sylvester R, Rogers R, et al. Changes in School Health Program Improve Middle School Students' Behaviors. *American Journal of Health Behavior* 2016;40(5):568-77. doi: 10.5993/ajhb.40.5.3
148. Duncan S, Stewart T, McPhee J, et al. Efficacy of a compulsory homework programme for increasing physical activity and improving nutrition in children: a cluster randomised controlled trial. *Int J Behav Nutr Phys Act* 2019;16(1):80. doi: 10.1186/s12966-019-0840-3
149. Ezendam NPM, Brug J, Oenema A. Evaluation of the web-based computer-tailored FATaintPHAT intervention to promote energy balance among adolescents: results from a school cluster randomized trial. *Archives of Pediatrics & Adolescent Medicine* 2012;166(3):248-55. doi: 10.1001/archpediatrics.2011.204
150. Fairclough SJ, Hackett AF, Davies IG, et al. Promoting healthy weight in primary school children through physical activity and nutrition education: a pragmatic evaluation of the CHANGE! randomised intervention study. *Bmc Public Health* 2013;13 doi: 10.1186/1471-2458-13-626



151. Fetter DS, Scherr RE, Linnell JD, et al. Effect of the Shaping Healthy Choices Program, a Multicomponent, School-Based Nutrition Intervention, on Physical Activity Intensity. *J Am Coll Nutr* 2018;37(6):472-78. doi: 10.1080/07315724.2018.1436477
152. Florence W, Ochola S, Irene O. Physical and Nutrition Education Intervention Improves Body Weight Status of Adolescents in Uasin Gishu County, Kenya: A Cluster-Randomized Controlled Trial. *Current Research in Nutrition and Food Science* 2020;8(1):318-32. doi: 10.12944/Crnfsj.8.1.30
153. Francis M, Nichols SSD, Dalrymple N. The effects of a school-based intervention programme on dietary intakes and physical activity among primary-school children in Trinidad and Tobago. *Public Health Nutrition* 2010;13(5):738-47. doi: 10.1017/S1368980010000182
154. Gentile DA, Welk G, Eisenmann JC, et al. Evaluation of a multiple ecological level child obesity prevention program: Switch (R) what you Do, View, and Chew. *Bmc Medicine* 2009;7 doi: 10.1186/1741-7015-7-49
155. Gortmaker SL, Peterson K, Wiecha J, et al. Reducing obesity via a school-based interdisciplinary intervention among youth - Planet health. *Archives of Pediatrics & Adolescent Medicine* 1999;153(4):409-18. doi: 10.1001/archpedi.153.4.409
156. Group HS, Foster GD, Linder B, et al. A school-based intervention for diabetes risk reduction. *N Engl J Med* 2010;363(5):443-53. doi: 10.1056/NEJMoa1001933
157. Grydeland M, Bjelland M, Anderssen SA, et al. Effects of a 20-month cluster randomised controlled school-based intervention trial on BMI of school-aged boys and girls: the HEIA study. *British journal of sports and medicine* 2014;48(9):768-73. doi: 10.1136/bjsports-2013-092284
158. Habib-Mourad C, Ghandour LA, Maliha C, et al. Impact of a Three-Year Obesity Prevention Study on Healthy Behaviors and BMI among Lebanese Schoolchildren: Findings from Ajyal Salima Program. *Nutrients* 2020;12(9) doi: 10.3390/nu12092687
159. Habib-Mourad C, Ghandour LA, Moore HJ, et al. Promoting healthy eating and physical activity among school children: findings from Health-E-PALS, the first pilot intervention from Lebanon. *Bmc Public Health* 2014;14(- 940) doi: 10.1186/1471-2458-14-940
160. Haerens L, De Bourdeaudhuij I, Maes L, et al. The effects of a middle-school healthy eating intervention on adolescents' fat and fruit intake and soft drinks consumption. *Public Health Nutrition* 2007;10(5):443-49. doi: 10.1017/s1368980007219652
161. Haerens L, Deforche B, Maes L, et al. A computer-tailored dietary fat intake intervention for adolescents: Results of a randomized controlled trial. *Annals of Behavioral Medicine* 2007;34(3):253-62. doi: 10.1007/bf02874550
162. Haerens L, Deforche B, Maes L, et al. Evaluation of a 2-year physical activity and healthy eating intervention in middle school children. *Health Education Research* 2006;21(6):911-21. doi: 10.1093/her/cyl115
163. Haerens L, Deforche B, Maes L, et al. Body mass effects of a physical activity and healthy food intervention in middle schools. *Obesity* 2006;14(5):847-54. doi: 10.1038/oby.2006.98
164. Hidayanty H, Bardosono S, Khusun H, Damayanti R, Kolopaking R. A social cognitive theory-based programme for eating patterns and sedentary activity among overweight adolescents in Makassar, South Sulawesi: a cluster randomised controlled trial. *Asia Pacific Journal of Clinical Nutrition* 2016;25(- Suppl 1):S83-S92. doi: 10.6133/apjcn.122016.s7

165. Himes JH, Ring K, Gittelsohn J, et al. Impact of the Pathways intervention on dietary intakes of American Indian schoolchildren. *Prev Med* 2003;37(6 Pt 2):S55-61. doi: 10.1016/j.ypmed.2003.08.003
166. Hopper CA, Munoz KD, Gruber MB, Nguyen KP. The effects of a family fitness program on the physical activity and nutrition behaviors of third-grade children. *Res Q Exerc Sport* 2005;76(2):130-9. doi: 10.1080/02701367.2005.10599275
167. Hrafinkelsson H, Magnusson KT, Thorsdottir I, Johannsson E, Sigurdsson EL. Result of school-based intervention on cardiovascular risk factors. *Scand J Prim Health Care* 2014;32(4):149-55. doi: 10.3109/02813432.2014.982363
168. Hutchinson J, Christian MS, Evans CE, et al. Evaluation of the impact of school gardening interventions on children's knowledge of and attitudes towards fruit and vegetables. A cluster randomised controlled trial. *Appetite* 2015;91:405-14. doi: 10.1016/j.appet.2015.04.076
169. Jago R, McMurray RG, Drews KL, et al. HEALTHY intervention: fitness, physical activity, and metabolic syndrome results. *Med Sci Sports Exerc* 2011;43(8):1513-22. doi: 10.1249/MSS.0b013e31820c9797
170. Jiang J, Xia X, Greiner T, et al. The effects of a 3-year obesity intervention in schoolchildren in Beijing. *Child Care Health and Development* 2007;33(5):641-46. doi: 10.1111/j.1365-2214.2007.00738.x
171. Johnston CA, Moreno JP, El-Mubasher A, et al. Impact of a school-based pediatric obesity prevention program facilitated by health professionals. *Journal of School Health* 2013;83(3):171-81. doi: doi.org/10.1111/josh.12013
172. Jørgensen TS, Rasmussen M, Aarestrup AK, et al. The role of curriculum dose for the promotion of fruit and vegetable intake among adolescents: results from the Boost intervention. *BMC Public Health* 2015;15:536. doi: 10.1186/s12889-015-1840-0
173. Kesztyus D, Lauer R, Kesztyus T, et al. Costs and effects of a state-wide health promotion program in primary schools in Germany - the Baden-Wurttemberg Study: A cluster-randomized, controlled trial. *PLoS One* 2017;12(2):e0172332. doi: 10.1371/journal.pone.0172332
174. Kipping RR, Howe LD, Jago R, et al. Effect of intervention aimed at increasing physical activity, reducing sedentary behaviour, and increasing fruit and vegetable consumption in children: Active for Life Year 5 (AFLY5) school based cluster randomised controlled trial. *Bmj-British Medical Journal* 2014;348 doi: 10.1136/bmj.g3256
175. Kipping RR, Jago R, Lawlor DA. Diet outcomes of a pilot school-based randomised controlled obesity prevention study with 9-10 year olds in England. *Prev Med* 2010;51(1):56-62. doi: 10.1016/j.ypmed.2010.04.011
176. Kipping RR, Payne C, Lawlor DA. Randomised controlled trial adapting US school obesity prevention to England. *Archives of disease in childhood* 2008;93(6):469-73. doi: 10.1136/adc.2007.116970
177. Koch PA, Contento IR, Gray HL, et al. Food, Health, & Choices: Curriculum and Wellness Interventions to Decrease Childhood Obesity in Fifth-Graders. *J Nutr Educ Behav* 2019;51(4):440-55. doi: 10.1016/j.jneb.2018.12.001

178. Kocken PL, Scholten AM, Westhoff E, et al. Effects of a theory-based education program to prevent overweightness in primary school children. *Nutrients* 2016;8(1) doi: 10.3390/nu8010012
179. Kristjansdottir AG, Johannsson E, Thorsdottir I. Effects of a school-based intervention on adherence of 7-9-year-olds to food-based dietary guidelines and intake of nutrients. *Public Health Nutr* 2010;13(8):1151-61. doi: 10.1017/S1368980010000716
180. Liu Z, Li Q, Maddison R, et al. A School-Based Comprehensive Intervention for Childhood Obesity in China: A Cluster Randomized Controlled Trial. *Child Obes* 2019;15(2):105-15. doi: 10.1089/chi.2018.0251
181. Llargues E, Franco R, Recasens A, et al. Assessment of a school-based intervention in eating habits and physical activity in school children: the AVall study. *J Epidemiol Community Health* 2011;65(10):896-901. doi: 10.1136/jech.2009.102319
182. Llargues E, Recasens A, Franco R, et al. Medium-term evaluation of an educational intervention on dietary and physical exercise habits in schoolchildren: the Avall 2 study. *Endocrinol Nutr* 2012;59(5):288-95. doi: 10.1016/j.endonu.2012.03.002
183. Llargués E, Recasens MA, Manresa JM, et al. Four-year outcomes of an educational intervention in healthy habits in schoolchildren: the Avall 3 Trial. *The European Journal of Public Health* 2017;27(1):42-47. doi: 10.1093/eurpub/ckw199
184. Llauro E, Tarro L, Morina D, et al. Follow-up of a healthy lifestyle education program (the EdAl study): four years after cessation of randomized controlled trial intervention. *BMC Public Health* 2018;18(1):104. doi: 10.1186/s12889-017-5006-0
185. Llauro E, Tarro L, Morina D, et al. EdAl-2 (Educacio en Alimentacio) programme: reproducibility of a cluster randomised, interventional, primary-school-based study to induce healthier lifestyle activities in children. *BMJ Open* 2014;4(11):e005496. doi: 10.1136/bmjopen-2014-005496
186. Lloyd J, Creanor S, Logan S, et al. Effectiveness of the Healthy Lifestyles Programme (HeLP) to prevent obesity in UK primary-school children: a cluster randomised controlled trial. *Lancet Child Adolesc Health* 2018;2(1):35-45. doi: 10.1016/S2352-4642(17)30151-7
187. Lloyd JJ, Wyatt KM, Creanor S. Behavioural and weight status outcomes from an exploratory trial of the Healthy Lifestyles Programme (HeLP): a novel school-based obesity prevention programme. *BMJ Open* 2012;2(3) doi: 10.1136/bmjopen-2011-000390
188. Lohman T, Thompson J, Going S, et al. Indices of changes in adiposity in American Indian children. *Prev Med* 2003;37(6 Pt 2):S91-6. doi: 10.1016/j.ypmed.2003.08.004
189. Lubans DR, Morgan PJ, Okely AD, et al. Preventing obesity among adolescent girls: one-year outcomes of the Nutrition and Enjoyable Activity for Teen Girls (NEAT girls) cluster randomized controlled trial. *Archives of Pediatrics & Adolescent Medicine* 2012;66(9):821-27. doi: 10.1001/archpediatrics.2012.41
190. Luepker RV, Perry CL, McKinlay SM, et al. Outcomes of a field trial to improve children's dietary patterns and physical activity. The Child and Adolescent Trial for Cardiovascular Health. CATCH collaborative group. *JAMA* 1996;275(10):768-76. doi: 10.1001/jama.1996.03530340032026

191. Luepker RV, Perry CL, Osganian V, et al. The child and adolescent trial for cardiovascular health (CATCH). *Journal of Nutritional Biochemistry* 1998;9(9):525-34. doi: Doi 10.1016/S0955-2863(98)00042-4
192. Lytle LA, Stone EJ, Nichaman MZ, et al. Changes in nutrient intakes of elementary school children following a school-based intervention: results from the CATCH Study. *Preventive medicine* 1996;25(4): 465-77. doi: 10.1006/pmed.1996.0078
193. Madsen K, Linchey J, Gerstein D, et al. Energy Balance 4 Kids with Play: Results from a Two-Year Cluster-Randomized Trial. *Childhood Obesity* 2015;11(4):375-83. doi: 10.1089/chi.2015.0002
194. Magnusson KT, Hrafnkelsson H, Sigurgeirsson I, Johannsson E, Sveinsson T. Limited effects of a 2-year school-based physical activity intervention on body composition and cardiorespiratory fitness in 7-year-old children. *Health education research* 2012;27(3): 484-94. doi: 10.1093/her/cys049
195. Marcus C, Nyberg G, Nordenfelt A, et al. A 4-year, cluster-randomized, controlled childhood obesity prevention study: STOPP. *Int J Obes (Lond)* 2009;33(4):408-17. doi: 10.1038/ijo.2009.38
196. Mauriello LM, Ciavatta MM, Paiva AL, et al. Results of a multi-media multiple behavior obesity prevention program for adolescents. *Prev Med* 2010;51(6):451-6. doi: 10.1016/j.jpmed.2010.08.004
197. Mora T, Llargues E, Recasens A. Does health education affect BMI? Evidence from a school-based randomised-control trial. *Economics & Human Biology* 2015;17:190-201. doi: 10.1016/j.ehb.2014.11.001
198. Moreno JP, Mohammed A, Moore CE, Johnston C. Benefits of a Snacking Intervention as Part of a School-Based Obesity Intervention for Mexican American Children. *Journal of Applied Research on Children* 2015;6(2):15.
199. Morrill BA, Madden GJ, Wengreen HJ, Fargo JD, Aguilar SS. A Randomized Controlled Trial of the Food Dudes Program: Tangible Rewards Are More Effective Than Social Rewards for Increasing Short- and Long-Term Fruit and Vegetable Consumption. *Journal of the Academy of Nutrition and Dietetics* 2016;116(4):618-29. doi: 10.1016/j.jand.2015.07.001
200. Nader PR, Stone EJ, Lytle LA, et al. Three-year maintenance of improved diet and physical activity: the CATCH cohort. Child and Adolescent Trial for Cardiovascular Health. *Arch Pediatr Adolesc Med* 1999;153(7):695-704. doi: 10.1001/archpedi.153.7.695
201. Nichols SDS, Francis MP, Dalrymple N. Sustainability of a Curriculum-based Intervention on Dietary Behaviours and Physical Activity among Primary School Children in Trinidad and Tobago. *West Indian Medical Journal* 2014;63(1):68-77. doi: 10.7727/wimj.2014.011
202. Nickel NC, Doupe M, Enns JE, et al. Differential effects of a school-based obesity prevention program: A cluster randomized trial. *Matern Child Nutr* 2021;17(1):e13009. doi: 10.1111/mcn.13009
203. Plachta-Danielzik S, Pust S, Asbeck I, et al. Four-year follow-up of school-based intervention on overweight children: the KOPS study. *Obesity* 2007;15(12):3159-69. doi: 10.1038/oby.2007.376

204. Rausch Herscovici C, Kovalskys I, De Gregorio MJ. Gender differences and a school-based obesity prevention program in Argentina: a randomized trial. *Rev Panam Salud Publica* 2013;34(2):75-82.
205. Rosario R, Araujo A, Oliveira B, et al. The impact of an intervention taught by trained teachers on childhood fruit and vegetable intake: a randomized trial. *Journal of obesity* 2012;2012 doi: 10.1155/2012/342138
206. Rosario R, Araujo A, Oliveira B, et al. Impact of an intervention through teachers to prevent consumption of low nutrition, energy-dense foods and beverages: A randomized trial. *Preventive Medicine* 2013;57(1):20-25. doi: 10.1016/j.ypmed.2013.02.027
207. Rosario R, Araujo A, Padrao P, et al. Impact of a school-based intervention to promote fruit intake: a cluster randomized controlled trial. *Public Health* 2016;136:94-100. doi: 10.1016/j.puhe.2016.03.013
208. Rosário R, Araújo A, Padrão P, et al. Health promotion intervention to improve diet quality in children: A randomized trial. *Health promotion practice* 2017;18(2):253-62. doi: 10.1177/1524839916634096
209. Rosario R, Oliveira B, Araujo A, et al. The impact of an intervention taught by trained teachers on childhood overweight. *International journal of environmental research and public health* 2012;9(4):1355-67. doi: 10.3390/ijerph9041355
210. Rush E, Reed P, McLennan S, et al. A school-based obesity control programme: Project Energize. Two-year outcomes. *Br J Nutr* 2012;107(4):581-7. doi: 10.1017/S0007114511003151
211. Sahota P, Rudolf MCJ, Dixey R, et al. Randomised controlled trial of primary school based intervention to reduce risk factors for obesity. *BMJ* 2001;323(7320):1029. doi: 10.1136/bmj.323.7320.1029
212. Salfdie M, Jennings-Aburto N, Levesque L, et al. Impact of a school-based intervention program on obesity risk factors in Mexican children. *Salud pública de México* 2013;55(3):374-87.
213. Sallis JF, McKenzie TL, Conway TL, et al. Environmental interventions for eating and physical activity: a randomized controlled trial in middle schools. *Am J Prev Med* 2003;24(3):209-17. doi: 10.1016/s0749-3797(02)00646-3
214. Santos RG, Durksen A, Rabbanni R, et al. Effectiveness of peer-based healthy living lesson plans on anthropometric measures and physical activity in elementary school students: a cluster randomized trial. *JAMA pediatrics* 2014;168(4):330-37. doi: 10.1001/jamapediatrics.2013.3688
215. Sgambato MR, Cunha DB, Souza BSN, et al. Effectiveness of school-home intervention for adolescent obesity prevention: parallel school randomised study. *British Journal of Nutrition* 2019;122(9):1073-80. doi: 10.1017/S0007114519001818
216. Siega-Riz AM, El Ghormli L, Mobley C, et al. The effects of the HEALTHY study intervention on middle school student dietary intakes. *Int J Behav Nutr Phys Act* 2011;8(7):7. doi: 10.1186/1479-5868-8-7
217. Singh AS, Paw MJMCA, Brug J, Mechelen Wv. Short-term effects of school-based weight gain prevention among adolescents. *Archives of pediatrics & adolescent medicine* 2007;161(6):565-71. doi: 10.1001/archpedi.161.6.565

218. Singh AS, Paw MJMCA, Brug J, Mechelen Wv. Dutch obesity intervention in teenagers: effectiveness of a school-based program on body composition and behavior. *Archives of pediatrics & adolescent medicine* 2009;163(4):309-17. doi: 10.1001/archpediatrics.2009.2
219. Singhal N, Misra A, Shah P, Gulati S. Effects of controlled school-based multi-component model of nutrition and lifestyle interventions on behavior modification, anthropometry and metabolic risk profile of urban Asian Indian adolescents in North India. *European journal of clinical nutrition* 2010;64(4):364-73.
220. Somsri P, Sathannoppakao W, Tipayamongkhogul M, Vatanasomboon P, Kasemsup R. A Cosmetic Content-Based Nutrition Education Program Improves Fruit and Vegetable Consumption Among Grade 11 Thai Students. *J Nutr Educ Behav* 2016;48(3):190-8.e1. doi: 10.1016/j.jneb.2015.11.002
221. Springer AE, Kelder SH, Byrd-Williams CE, et al. Promoting energy-balance behaviors among ethnically diverse adolescents: overview and baseline findings of the Central Texas CATCH middle school project. *Health Education & Behavior* 2013;40(5):559-70. doi: 10.1177/1090198112459516
222. Tarro L, Llauro E, Aceves-Martins M, et al. Impact of a youth-led social marketing intervention run by adolescents to encourage healthy lifestyles among younger school peers (EYTO-Kids project): a parallel-cluster randomised controlled pilot study. *J Epidemiol Community Health* 2019;73(4):324-33. doi: 10.1136/jech-2017-210163
223. Tarro L, Llauro E, Albaladejo R, et al. A primary-school-based study to reduce the prevalence of childhood obesity - the EdAI (Educacio en Alimentacio) study: a randomized controlled trial. *Trials* 2014;15 doi: 10.1186/1745-6215-15-58
224. Treviño RP, Yin Z, Hernandez A, et al. Impact of the Bienestar school-based diabetes mellitus prevention program on fasting capillary glucose levels: a randomized controlled trial. *Archives of pediatrics & adolescent medicine* 2004;158(9):911-17. doi: 10.1001/archpedi.158.9.911
225. Van Lippevelde W, van Stralen M, Verloigne M, et al. Mediating effects of home-related factors on fat intake from snacks in a school-based nutrition intervention among adolescents. *Health education research* 2012;27(1):36-45. doi: 10.1093/her/cyr110
226. Walter HJ, Hofman A, Connelly PA, Barrett LT, Kost KL. Coronary heart disease prevention in childhood: one-year results of a randomized intervention study. *Am J Prev Med* 1986;2(4):239-45.
227. Walter HJ, Hofman A, Vaughan RD, Wynder EL. Modification of risk factors for coronary heart disease. Five-year results of a school-based intervention trial. *N Engl J Med* 1988;318(17):1093-100. doi: 10.1056/NEJM198804283181704
228. Wansink B, Just DR, Hanks AS, Smith LE. Pre-sliced fruit in school cafeterias: children's selection and intake. *Am J Prev Med* 2013;44(5):477-80. doi: 10.1016/j.amepre.2013.02.003
229. Waters E, Gibbs L, Tadic M, et al. Cluster randomised trial of a school-community child health promotion and obesity prevention intervention: findings from the evaluation of fun 'n healthy in Moreland! *BMC public health* 2018;18(92):1-16. doi: 10.1186/s12889-017-4625-9
230. Widhalm K, Helk O, Pachinger O. The Viennese EDDY Study as a Role Model for Obesity: Prevention by Means of Nutritional and Lifestyle Interventions. *Obesity Facts* 2018;11(3):247-56. doi: 10.1159/000481140

231. Williamson DA, Champagne CM, Harsha DW, et al. Effect of an environmental school-based obesity prevention program on changes in body fat and body weight: a randomized trial. *Obesity* 2012;20(8) doi: 10.1038/oby.2012.60
232. Williamson DA, Copeland AL, Anton SD, et al. Wise Mind project: a school-based environmental approach for preventing weight gain in children. *Obesity* 2007;15(4):906-17. doi: 10.1038/oby.2007.597
233. Williamson DA, Han HM, Johnson WD, Martin CK, Newton RL. Modification of the school cafeteria environment can impact childhood nutrition. Results from the Wise Mind and LA Health studies. *Appetite* 2013;61:77-84. doi: 10.1016/j.appet.2012.11.002
234. Wilson DB, Jones RM, McClish D, Westerberg AL, Danish S. Fruit and vegetable intake among rural youth following a school-based randomized controlled trial. *Preventive Medicine* 2011;54(2):150-56. doi: 10.1016/j.ypmed.2011.11.005
235. Wright K, Norris K, Giger JN, Suro Z. Improving Healthy Dietary Behaviors, Nutrition Knowledge, and Self-Efficacy among Underserved School Children with Parent and Community Involvement. *Childhood Obesity* 2012;8(4):347-56. doi: 10.1089/chi.2012.0045
236. Xu F, Wang XR, Ware RS, et al. A school-based comprehensive lifestyle intervention among Chinese kids against Obesity (CLICK-Obesity) in Nanjing City, China: the baseline data. *Asia Pacific Journal of Clinical Nutrition* 2014;23(1):48-54. doi: 10.6133/apjcn.2014.23.1.04
237. Xu F, Ware RS, Leslie E, et al. Effectiveness of a Randomized Controlled Lifestyle Intervention to Prevent Obesity among Chinese Primary School Students: CLICK-Obesity Study. *Plos One* 2015;10(10) doi: 10.1371/journal.pone.0141421
238. Xu H, Li Y, Zhang Q, et al. Comprehensive school-based intervention to control overweight and obesity in China: a cluster randomized controlled trial. *Asia Pac J Clin Nutr* 2017;26(6):1139-51. doi: 10.6133/apjcn.112016.05
239. Xu HQ, Ecker O, Zhang Q, et al. The effect of comprehensive intervention for childhood obesity on dietary diversity among younger children: Evidence from a school-based randomized controlled trial in China. *Plos One* 2020;15(7) doi: 10.1371/journal.pone.0235951
240. ACTRN12612000417886. Beijing Adolescent Obesity Peer Education [cited 2021 Sep 01]. Available from: <https://anzctr.org.au/ACTRN12612000417886.aspx>, 2012.
241. U1111-11875913. RBR-9sp5hx Program at school: Healthy Living, Happy Heart [cited 2021 Sep 01]. Available from: <http://ensaiosclinicos.gov.br/rg/RBR-9sp5hx>, 2016.
242. Allara E, Angelini P, Gorini G, et al. Effects of a prevention program on multiple health-compromising behaviours in adolescence: A cluster randomized controlled trial. *Prev Med* 2019;124:1-10. doi: 10.1016/j.ypmed.2019.04.001
243. Allara E, Angelini P, Gorini G, et al. A prevention program for multiple health-compromising behaviors in adolescence: baseline results from a cluster randomized controlled trial. *Prev Med* 2015;71:20-6. doi: 10.1016/j.ypmed.2014.12.002
244. Ames SL, Wurpts IC, Pike JR, et al. Self-regulation interventions to reduce consumption of sugar-sweetened beverages in adolescents. *Appetite* 2016;105:652-62. doi: 10.1016/j.appet.2016.06.036

245. Arbeit ML, Johnson CC, Mott DS, et al. The Heart Smart cardiovascular school health promotion: behavior correlates of risk factor change. *Prev Med* 1992;21(1):18-32. doi: 10.1016/0091-7435(92)90003-z
246. Arlinghaus KR, Moreno JP, Reesor L, Hernandez DC, Johnston CA. Companeros: High School Students Mentor Middle School Students to Address Obesity Among Hispanic Adolescents. *Preventing Chronic Disease* 2017;14(- 10) doi: 10.5888/pcd14.170130
247. Arlinghaus KR, O'Connor DP, Johnston CA. Frequency of school-based intervention needed to improve weight outcomes of Mexican-American adolescents with overweight or obesity: a randomized controlled trial. *Pediatric obesity* 2019;14(12) doi: doi.org/10.1111/ijpo.12568
248. Azmawati Mohammed N, Farrah Ilyani CJ. Effect of internet-based intervention on obesity among adolescents in Kuala Lumpur: a school-based cluster randomised trial. *The Malaysian journal of medical sciences: MJMS* 2015;22(4):47.
249. Barbosa Filho VC, Bandeira ADS, Minatto G, et al. Effect of a Multicomponent Intervention on Lifestyle Factors among Brazilian Adolescents from Low Human Development Index Areas: a Cluster-Randomized Controlled Trial. *International journal of environmental research and public health* 2019;16(2):267. doi: 10.3390/ijerph16020267
250. Botvin GJ, Cantlon A, Carter BJ, Williams CL. Reducing adolescent obesity through a school health program. *The Journal of pediatrics* 1979;95(6):1060-62. doi: 10.1016/S0022-3476(79)80312-1
251. Branscum P, Sharma M, Wang LL, Wilson BRA, Rojas-Guyler L. A True Challenge for Any Superhero An Evaluation of a Comic Book Obesity Prevention Program. *Family & Community Health* 2013;36(1):63-76. doi: 10.1097/FCH.0b013e31826d7607
252. Breslin G, Brennan D, Rafferty R, Gallagher AM, Hanna D. The effect of a healthy lifestyle programme on 8-9 year olds from social disadvantage. *Archives of disease in childhood* 2012;97(7):618-24. doi: 10.1136/archdischild-2011-301108
253. Burke V, Milligan RAK, Thompson C, et al. A controlled trial of health promotion programs in 11-year-olds using physical activity "enrichment" for higher risk children. *Journal of Pediatrics* 1998;132(5):840-48. doi: Doi 10.1016/S0022-3476(98)70315-4
254. Bush PJ, Zuckerman AE, Taggart VS, et al. Cardiovascular risk factor prevention in black school children: the "Know Your Body" evaluation project. *Health education quarterly* 1989;16(2):215-27. doi: 10.1177/109019818901600206
255. Bush PJ, Zuckerman AE, Theiss PK, et al. Cardiovascular risk factor prevention in black schoolchildren: two-year results of the "Know Your Body" program. *American Journal of Epidemiology* 1989;129(3):466-82.
256. Chagas CMD, Melo GRS, Botelho RBA, Toral N. Effects of theRango Cardsgame intervention on food consumption, nutritional knowledge and self-efficacy in the adoption of healthy eating practices of high school students: a cluster randomised controlled trial. *Public Health Nutrition* 2020;23(13):2424-33. doi: 10.1017/s1368980020000531
257. Chavarro JE, Peterson KE, Sobol AM, Wiecha JL, Gortmaker SL. Effects of a school-based obesity-prevention intervention on menarche (United States). *Cancer Causes Control* 2005;16(10):1245-52. doi: 10.1007/s10552-005-0404-5
258. Coleman KJ, Shordon M, Caparosa SL, Pomichowski ME, Dzewaltowski DA. The healthy options for nutrition environments in schools (Healthy ONES) group randomized trial: using



- implementation models to change nutrition policy and environments in low income schools. *International Journal of Behavioral Nutrition and Physical Activity* 2012;9(80) doi: 10.1186/1479-5868-9-80
259. Cradock AL, Barrett JL, Giles CM, et al. Promoting Physical Activity With the Out of School Nutrition and Physical Activity (OSNAP) Initiative: a Cluster-Randomized Controlled Trial. *JAMA pediatrics* 2016;170(2):155-62. doi: 10.1001/jamapediatrics.2015.3406
260. de Villiers A, Steyn NP, Draper CE, et al. Primary School Children's Nutrition Knowledge, Self-Efficacy, and Behavior, after a Three-Year Healthy Lifestyle Intervention (HealthKick). *Ethn Dis* 2016;26(2):171-80. doi: 10.18865/ed.26.2.171
261. DeBar LL, Schneider M, Drews KL, et al. Student public commitment in a school-based diabetes prevention project: impact on physical health and health behavior. *BMC Public Health* 2011;11:711. doi: 10.1186/1471-2458-11-711
262. Dewar DL, Morgan PJ, Plotnikoff RC, et al. The nutrition and enjoyable activity for teen girls study: a cluster randomized controlled trial. *Am J Prev Med* 2013;45(3):313-7. doi: 10.1016/j.amepre.2013.04.014
263. Dixon H, Scully M, Kelly B, Chapman K, Wakefield M. Can counter-advertising reduce pre-adolescent children's susceptibility to front-of-package promotions on unhealthy foods? Experimental research. *Social Science & Medicine* 2014;116:211-19. doi: 10.1016/j.socscimed.2014.02.031
264. Duus KS, Bonnesen CT, Rosing JA, et al. Effect of the multicomponent healthy high school intervention on meal frequency and eating habits among high school students in Denmark: a cluster randomized controlled trial. *Int J Behav Nutr Phys Act* 2022;19(1):12. doi: 10.1186/s12966-021-01228-2
265. Dzewaltowski DA, Estabrooks PA, Welk G, et al. Healthy youth places: a randomized controlled trial to determine the effectiveness of facilitating adult and youth leaders to promote physical activity and fruit and vegetable consumption in middle schools. *Health Education & Behavior* 2009;36(3):583-600. doi: 10.1177/1090198108314619
266. Fornari LS, Giuliano I, Azevedo F, et al. Children First Study: how an educational program in cardiovascular prevention at school can improve parents' cardiovascular risk. *European Journal of Preventive Cardiology* 2013;20(2):301-09. doi: 10.1177/2047487312437617
267. Franken SCM, Smit CR, Buijzen M. Promoting water consumption on a Caribbean Island: an intervention using children's social networks at schools. *International journal of environmental research and public health* 2018;15(4):713. doi: 10.3390/ijerph15040713
268. Graf C, Koch B, Falkowski G, et al. Effects of a school-based intervention on BMI and motor abilities in childhood. *Journal of Sports Science and Medicine* 2005;4(3):291-99.
269. Greve J, Heinesen E. Evaluating the impact of a school-based health intervention using a randomized field experiment. *Economics & Human Biology* 2015;18:41-56. doi: 10.1016/j.ehb.2015.03.005
270. Grey M, Jaser SS, Holl MG, et al. A multifaceted school-based intervention to reduce risk for type 2 diabetes in at-risk youth. *Prev Med* 2009;49(2-3):122-8. doi: 10.1016/j.yjpm.2009.07.014
271. Gustafson A, Pitts SBJ, McQuerry K, Babtunde O, Mullins J. A mentor-led text-messaging intervention increases intake of fruits and vegetables and goal setting for healthier dietary

- consumption among rural adolescents in Kentucky and North Carolina, 2017. *Nutrients* 2019;11(3): 593. doi: 10.3390/nu11030593
272. Habib-Mourad C, Ghandour LA, Maliha C, et al. Impact of a one-year school-based teacher-implemented nutrition and physical activity intervention: main findings and future recommendations. *BMC Public Health* 2020;20(1):256. doi: 10.1186/s12889-020-8351-3
273. Harrell JS, McMurray RG, Bangdiwala SI, et al. Effects of a school-based intervention to reduce cardiovascular disease risk factors in elementary-school children: the Cardiovascular Health in Children (CHIC) study. *J Pediatr* 1996;128(6):797-805. doi: 10.1016/s0022-3476(96)70332-3
274. Harrell JS, McMurray RG, Gansky SA, Bangdiwala SI, Bradley CB. A public health vs a risk-based intervention to improve cardiovascular health in elementary school children: the Cardiovascular Health in Children Study. *Am J Public Health* 1999;89(10):1529-35. doi: 10.2105/ajph.89.10.1529
275. Harrell TK, Davy BM, Stewart JL, King DS. Effectiveness of a school-based intervention to increase health knowledge of cardiovascular disease risk factors among rural Mississippi middle school children. *Southern Medical Journal* 2005;98(12):1173-80. doi: DOI 10.1097/01.smj.0000182499.59715.07
276. Jansen W, Borsboom G, Meima A, et al. Effectiveness of a primary school-based intervention to reduce overweight. *International Journal of Pediatric Obesity* 2011;6(sup3): e70-77. doi: 10.3109/17477166.2011.575151
277. Jemmott JB, Jemmott LS, O'Leary A, et al. Cognitive-behavioural health-promotion intervention increases fruit and vegetable consumption and physical activity among South African adolescents: a cluster-randomised controlled trial. *Psychology & Health* 2011;26(2):167-85. doi: 10.1080/08870446.2011.531573
278. Jemmott JB, Zhang JW, Jemmott LS, et al. Intervention Increases Physical Activity and Healthful Diet Among South African Adolescents Over 54 Months: A Randomized Controlled Trial. *Journal of Adolescent Health* 2019;65(1):139-46. doi: 10.1016/j.jadohealth.2019.01.027
279. Kafatos A, Manios Y, Moschandreas J. Health and nutrition education in primary schools of Crete: follow-up changes in body mass index and overweight status. *European journal of clinical nutrition* 2005;59(9):1090-92. doi: 10.1038/sj.ejcn.1602216
280. Kapadia-Kundu N, Storey D, Safi B, et al. Seeds of prevention: the impact on health behaviors of young adolescent girls in Uttar Pradesh, India, a cluster randomized control trial. *Soc Sci Med* 2014;120:169-79. doi: 10.1016/j.socscimed.2014.09.002
281. Keshani P, Mousavi SM, Mirzaei Z, et al. Effect of a School-based Nutrition Education Program on the Nutritional Status of Primary School Children. *Nutrition and Food Sciences Research* 2016;3(1):27-34. doi: 10.18869/acadpub.nfsr.3.1.27
282. Killen JD, Robinson TN, Telch MJ, et al. The Stanford Adolescent Heart Health Program. *Health Education Quarterly* 1989;16(2):263-83. doi: 10.1177/109019818901600210
283. Killen JD, Telch MJ, Robinson TN, et al. Cardiovascular disease risk reduction for tenth graders. A multiple-factor school-based approach. *JAMA* 1988;260(12):1728-33.
284. Kobel S, Kesztyus D, Steinacker JM. [Teacher-Based Health Promotion in Primary School Children in Baden-Wuerttemberg: Effects on Endurance Performance and Incidence of Abdominal Obesity]. *Gesundheitswesen* 2020;82(11):901-08. doi: 10.1055/a-0921-7076

285. Kobel S, Lammler C, Wartha O, et al. Effects of a Randomised Controlled School-Based Health Promotion Intervention on Obesity Related Behavioural Outcomes of Children with Migration Background. *J Immigr Minor Health* 2017;19(2):254-62. doi: 10.1007/s10903-016-0460-9
286. Kobel S, Wirt T, Schreiber A, et al. Intervention effects of a school-based health promotion programme on obesity related behavioural outcomes. *J Obes* 2014;2014:476230. doi: 10.1155/2014/476230
287. Kolip P. Does health promotion in primary schools work? A randomized waiting list control group study for the Klasse2000 program. *Prävention und Gesundheitsförderung* 2017;12(3):211-17. doi: 10.1007/s11553-017-0585-2
288. Leme ACB, Baranowski T, Thompson D, Nicklas T, Philippi ST. Sustained impact of the "Healthy Habits, Healthy Girls - Brazil" school-based randomized controlled trial for adolescents living in low-income communities. *Preventive medicine reports* 2018;10:346-52. doi: 10.1016/j.pmedr.2018.04.013
289. Leme ACB, Lubans DR, Guerra PH, et al. Preventing obesity among Brazilian adolescent girls: Six-month outcomes of the Healthy Habits, Healthy Girls-Brazil school-based randomized controlled trial. *Preventive Medicine* 2016;86:77-83. doi: 10.1016/j.ypmed.2016.01.020
290. Li B, Pallan M, Liu WJ, et al. The CHIRPY DRAGON intervention in preventing obesity in Chinese primary-school-aged children: A cluster-randomised controlled trial. *PLoS Med* 2019;16(11):e1002971. doi: 10.1371/journal.pmed.1002971
291. Lin YC, Chen HJ, Wang YF, et al. NASA Mission X Program for Healthy Eating and Active Living among Taiwanese Elementary School Students. *Journal of Pediatric Nursing-Nursing Care of Children & Families* 2019;49:E8-E14. doi: 10.1016/j.pedn.2019.06.016
292. Liu Z, Gao P, Gao AY, et al. Effectiveness of a Multifaceted Intervention for Prevention of Obesity in Primary School Children in China: A Cluster Randomized Clinical Trial. *JAMA Pediatr* 2022;176(1):e214375. doi: 10.1001/jamapediatrics.2021.4375
293. Lubans DR, Morgan PJ, Aguiar EJ, Callister R. Randomized controlled trial of the Physical Activity Leaders (PALs) program for adolescent boys from disadvantaged secondary schools. *Prev Med* 2011;52(3-4):239-46. doi: 10.1016/j.ypmed.2011.01.009
294. Lubans DR, Morgan PJ, Callister R, Collins CE. Effects of Integrating Pedometers, Parental Materials, and E-mail Support Within an Extracurricular School Sport Intervention. *Journal of Adolescent Health* 2009;44(2):176-83. doi: 10.1016/j.jadohealth.2008.06.020
295. Manios Y, Kafatos A. Health and nutrition education in elementary schools: changes in health knowledge, nutrient intakes and physical activity over a six year period. *Public Health Nutr* 1999;2(3A):445-8. doi: 10.1017/s1368980099000610
296. Manios Y, Moschandreas J, Hatzis C, Kafatos A. Evaluation of a health and nutrition education program in primary school children of Crete over a three-year period. *Prev Med* 1999;28(2):149-59. doi: 10.1006/pmed.1998.0388
297. Manios Y, Moschandreas J, Hatzis C, Kafatos A. Health and nutrition education in primary schools of Crete: changes in chronic disease risk factors following a 6-year intervention programme. *Br J Nutr* 2002;88(3):315-24. doi: 10.1079/BJN2002672
298. Melnyk BM, Jacobson D, Kelly S, et al. Promoting healthy lifestyles in high school adolescents: a randomized controlled trial. *Am J Prev Med* 2013;45(4):407-15. doi: 10.1016/j.amepre.2013.05.013

299. Mihas C, Mariolis A, Manios Y, et al. Evaluation of a nutrition intervention in adolescents of an urban area in Greece: short- and long-term effects of the VYRONAS study. *Public Health Nutr* 2010;13(5):712-9. doi: 10.1017/S1368980009991625
300. Moitra P, Madan J, Verma P. Impact of a behaviourally focused nutrition education intervention on attitudes and practices related to eating habits and activity levels in Indian adolescents. *Public Health Nutr* 2021;24(9):2715-26. doi: 10.1017/s1368980021000203
301. Morstadt E, Pfaff G, Schwarz J, Potschke-Langer M. [Design of and involvement in an interventional study on health education in basic schools: the Pforzheim Study]. *Soz Praventivmed* 1991;36(3):147-53. doi: 10.1007/BF01352693
302. Mumm J, Hearst MO, Shanafelt A, et al. Increasing social support for breakfast: project BreakFAST. *Health promotion practice* 2017;18(6):862-68. doi: 10.1177/1524839917711123
303. Neumark-Sztainer D, Haines J, Robinson-O'Brien R, et al. 'Ready. Set. ACTION!' A theater-based obesity prevention program for children: a feasibility study. *Health Education Research* 2009;24(3):407-20. doi: 10.1093/her/cyn036
304. Neumark-Sztainer DR, Friend SE, Flattum CF, et al. New moves-preventing weight-related problems in adolescent girls a group-randomized study. *Am J Prev Med* 2010;39(5):421-32. doi: 10.1016/j.amepre.2010.07.017
305. O'Neill JM, Clark JK, Jones JA. Promoting Fitness and Safety in Elementary Students: a Randomized Control Study of the Michigan Model for Health. *Journal of school health* 2016;86(7):516-25.
306. Ochoa-Aviles A, Verstraeten R, Huybregts L, et al. A school-based intervention improved dietary intake outcomes and reduced waist circumference in adolescents: a cluster randomized controlled trial. *Nutr J* 2017;16(1):79. doi: 10.1186/s12937-017-0299-5
307. Pablos A, Nebot V, Vano-Vicent V, Ceca D, Elvira L. Effectiveness of a school-based program focusing on diet and health habits taught through physical exercise. *Applied Physiology Nutrition and Metabolism* 2018;43(4):331-37. doi: 10.1139/apnm-2017-0348
308. Panunzio MF, Caporizzi R, Antoniciello A, et al. Training the teachers for improving primary schoolchildren's fruit and vegetables intake: a randomized controlled trial. *Ann Ig* 2011;23(3):249-60.
309. Philippi ST, Leme ACB. Dietary intake and meal frequency of Brazilian girls attending a school-based randomized controlled trial. *Nutrition & Food Science* 2015;45(6):954-68. doi: 10.1108/Nfs-06-2015-0072
310. Saraf DS, Gupta SK, Pandav CS, et al. Effectiveness of a school based intervention for prevention of non-communicable diseases in middle school children of rural North India: a randomized controlled trial. *The Indian Journal of Pediatrics* 2015;82(4):354-62. doi: 10.1007/s12098-014-1562-9
311. Selamat R, Raib J, Abdul Aziz NA, et al. Fruit and vegetable intake among overweight and obese school children: A cluster randomised control trial. *Malaysian Journal of Nutrition* 2021;27(1):067-79. doi: 10.31246/mjn-2020-0023
312. Siegrist M, Lammel C, Haller B, Christle J, Halle M. Effects of a physical education program on physical activity, fitness, and health in children: the JuvenTUM project. *Scandinavian Journal of Medicine & Science in Sports* 2013;23(3):323-30. doi: 10.1111/j.1600-0838.2011.01387.x

313. Silva KBBd, Ortelan N, Murta SG, et al. Evaluation of the computer-based intervention program Stayingfit Brazil to promote healthy eating habits: the results from a school cluster-randomized controlled trial. *International journal of environmental research and public health* 2019;16(10) doi: 10.3390/ijerph16101674
314. Steyn NP, Villiers Ad, Gwebushe N, et al. Did HealthKick, a randomised controlled trial primary school nutrition intervention improve dietary quality of children in low-income settings in South Africa? *BMC Public Health* 2015;15(1):1-11.
315. Stölzel F, Seidel N, Uhmman S, et al. Be smart against cancer! A school-based program covering cancer-related risk behavior. *BMC Public Health* 2014;14(1):1-9. doi: 10.1186/1471-2458-14-392
316. Thakur JS, Bhavneet B, Tripathy JP, Veena D, Anil B. Impact of 20 week lifestyle intervention package on anthropometric biochemical and behavioral characteristics of schoolchildren in North India. *Journal of tropical pediatrics* 2016;62(5):368-76.
317. Velicer WF, Redding CA, Paiva AL, et al. Multiple behavior interventions to prevent substance abuse and increase energy balance behaviors in middle school students. *Translational Behavioral Medicine* 2013;3(1):82-93. doi: 10.1007/s13142-013-0197-0
318. Walter HJ, Hofman A, Connelly PA, et al. Primary prevention of chronic disease in childhood: changes in risk factors after one year of intervention. *American Journal of Epidemiology* 1985;122(5):772-81.
319. Wyatt KM, Lloyd JJ, Creanor S, Logan S. The development, feasibility and acceptability of a school-based obesity prevention programme: results from three phases of piloting. *Bmj Open* 2011;1(1) doi: 10.1136/bmjopen-2010-000026
320. Yamashiro M, Seko C, Odani K, et al. Evaluation of a dietary education intervention study designed to increase the frequency of fruit intake in sixth grade primary school children. *The Japanese Journal of Nutrition and Dietetics* 2020;78(3) doi: 10.5264/eiyogakuzashi.78.102
321. Yin Z, Gutin B, Johnson MH, et al. An environmental approach to obesity prevention in children: medical College of Georgia FitKid Project year 1 results. *Obesity Research* 2005;13(12):2153-61.
322. NTR6115. Prevention of Overweight in Children at Schools: ‘Born to Move’ and ‘Share H2O’ [cited 2021 Sep 01]. Available from: <https://trialregister.nl/trial/5934>, 2016.
323. Beets MW, Weaver RG, Turner-McGrievy G, et al. Two-Year Healthy Eating Outcomes: An RCT in Afterschool Programs. *Am J Prev Med* 2017;53(3):316-26. doi: 10.1016/j.amepre.2017.03.009
324. Berry DC, Neal M, Hall EG, et al. Recruitment and retention strategies for a community-based weight management study for multi-ethnic elementary school children and their parents. *Public Health Nursing* 2013;30(1):80-86. doi: doi.org/10.1111/phn.12003
325. Bogart LM, Cowgill BO, Elliott MN, et al. A randomized controlled trial of students for nutrition and eXercise: a community-based participatory research study. *J Adolesc Health* 2014;55(3):415-22. doi: 10.1016/j.jadohealth.2014.03.003
326. Brennan SF, Lavelle F, Moore SE, et al. Food environment intervention improves food knowledge, wellbeing and dietary habits in primary school children: Project Daire, a randomised-controlled, factorial design cluster trial. *Int J Behav Nutr Phys Act* 2021;18(1):23. doi: 10.1186/s12966-021-01086-y

327. Chung LMY, Fong SSM. Role of behavioural feedback in nutrition education for enhancing nutrition knowledge and improving nutritional behaviour among adolescents. *Asia Pacific Journal of Clinical Nutrition* 2018;27(2):466-72. doi: 10.6133/apjcn.042017.03
328. Coates TJ, Barofsky I, Saylor KE, et al. Modifying the snack food consumption patterns of inner city high school students: the Great Sensations Study. *Prev Med* 1985;14(2):234-47. doi: 10.1016/0091-7435(85)90039-8
329. Crepinsek MK, Singh A, Bernstein LS, McLaughlin JE. Dietary effects of universal-free school breakfast: findings from the evaluation of the school breakfast program pilot project. *J Am Diet Assoc* 2006;106(11):1796-803. doi: 10.1016/j.jada.2006.08.013
330. Cunningham-Sabo L, Lohse B. Cooking with Kids positively affects fourth graders' vegetable preferences and attitudes and self-efficacy for food and cooking. *Child Obes* 2013;9(6):549-56. doi: 10.1089/chi.2013.0076
331. Davis JN, Martinez LC, Spruijt-Metz D, Gatto NM. LA Sprouts: A 12-Week Gardening, Nutrition, and Cooking Randomized Control Trial Improves Determinants of Dietary Behaviors. *J Nutr Educ Behav* 2016;48(1):2-11 e1. doi: 10.1016/j.jneb.2015.08.009
332. Davis SM, Clay T, Smyth M, et al. Pathways curriculum and family interventions to promote healthful eating and physical activity in American Indian schoolchildren. *Prev Med* 2003;37(6 Pt 2):S24-34. doi: 10.1016/j.ypped.2003.08.011
333. Dzielska A, Mazur J, Nalecz H, Oblacinska A, Fijalkowska A. Importance of self-efficacy in eating behavior and physical activity change of overweight and non-overweight adolescent girls participating in healthy me: a lifestyle intervention with mobile technology. *Nutrients* 2020;12(7):2128. doi: 10.3390/nu12072128
334. Ezendam NP, Brug J, Borsboom G, van Empelen P, Oenema A. Differential effects of the computer-tailored FATaintPHAT programme on dietary behaviours according to sociodemographic, cognitive and home environmental factors. *Public Health Nutr* 2014;17(2):431-9. doi: 10.1017/S1368980012005344
335. Fathi A, Sharifirad G, Gharlipour Z, Hakimelahi J, Mohebi S. Effects of a Nutrition Education Intervention Designed based on the Health Belief Model (HBM) on Reducing the Consumption of Unhealthy Snacks in the Sixth Grade Primary School Girls. *International Journal of Pediatrics-Mashhad* 2017;5(2):4361-70. doi: 10.22038/ijp.2016.7567
336. Follong BM, Prieto-Rodriguez E, Miller A, Collins CE, Bucher T. Evaluating an integrated nutrition and mathematics curriculum: primary school teachers' and students' experiences. *Public Health Nutr* 2022:1-12. doi: 10.1017/s1368980022000386
337. French SA, Story M, Fulkerson JA, Hannan P. An environmental intervention to promote lower-fat food choices in secondary schools: outcomes of the TACOS Study. *Am J Public Health* 2004;94(9):1507-12. doi: 10.2105/ajph.94.9.1507
338. Gaglianone CP, Taddei JAdAC, Colugnati FAB, et al. Nutrition education in public elementary schools of Sao Paulo, Brazil: the Reducing Risks of Illness and Death in Adulthood project. *Revista de Nutrição* 2006;19(3):309-20. doi: 10.1590/S1415-52732006000300002
339. Goldberg JP, Folta SC, Eliasziw M, et al. Great Taste, Less Waste: A cluster-randomized trial using a communications campaign to improve the quality of foods brought from home to school by elementary school children. *Preventive Medicine* 2015;74:103-10. doi: 10.1016/j.ypped.2015.02.010

340. Griffin TL, Jackson DM, McNeill G, Aucott LS, Macdiarmid JI. A Brief Educational Intervention Increases Knowledge of the Sugar Content of Foods and Drinks but Does Not Decrease Intakes in Scottish Children Aged 10-12 Years. *Journal of nutrition education and behavior* 2015;47(4):367-73.
341. Hanks AS, Just DR, Brumberg A. Marketing Vegetables in Elementary School Cafeterias to Increase Uptake. *Pediatrics* 2016;138(2) doi: 10.1542/peds.2015-1720
342. Hawkins KR, Burton JH, Apolzan JW, et al. Efficacy of a school-based obesity prevention intervention at reducing added sugar and sodium in children's school lunches: the LA Health randomized controlled trial. *International Journal of Obesity* 2018;42(11):1845-52. doi: 10.1038/s41366-018-0214-y
343. Horne PJ, Hardman CA, Lowe CF, et al. Increasing parental provision and children's consumption of lunchbox fruit and vegetables in Ireland: the Food Dudes intervention. *European journal of clinical nutrition* 2009;63(5):613-18.
344. King AC, Saylor KE, Foster S, et al. Promoting dietary change in adolescents: a school-based approach for modifying and maintaining healthful behavior. *Am J Prev Med* 1988;4(2):68-74.
345. Klepp K-I, Rodrigo CP, Thorsdottir I, et al. Promoting and sustaining health through increased vegetable and fruit consumption among European schoolchildren: The Pro Children Project. *Journal of Public Health* 2005;13(2):97-101. doi: 10.1007/s10389-004-0095-5
346. Kocken PL, Eeuwijk J, Kesteren NMCv, et al. Promoting the purchase of low-calorie foods from school vending machines: a cluster-randomized controlled study. *Journal of School Health* 2012;82(3):115-22. doi: 10.1111/j.1746-1561.2011.00674.x
347. Kocken PL, van Kesteren NMC, Buijs G, Snel J, Dusseldorp E. Students' beliefs and behaviour regarding low-calorie beverages, sweets or snacks: are they affected by lessons on healthy food and by changes to school vending machines? *Public Health Nutrition* 2015;18(9):1545-53. doi: 10.1017/S1368980014002985
348. Lytle LA, Kubik MY, Perry C, et al. Influencing healthful food choices in school and home environments: results from the TEENS study. *Prev Med* 2006;43(1):8-13. doi: 10.1016/j.ypmed.2006.03.020
349. Nguyen T, de Brauw A, van den Berg M, Do HTP. Testing methods to increase consumption of healthy foods evidence from a school-based field experiment in Viet Nam. *Food Policy* 2021;101:102047. doi: 10.1016/j.foodpol.2021.102047
350. Nicklas TA, O'Neil CE. Process of conducting a 5-a-day intervention with high school students: gimme 5 (Louisiana). *Health Education & Behavior* 2000;27(2):201-12. doi: 10.1177/109019810002700206
351. Osganian SK, Hoelscher DM, Zive M, et al. Maintenance of effects of the eat smart school food service program: results from the CATCH-ON study. *Health Education & Behavior* 2003;30(4):418-33. doi: 10.1177/1090198103253509
352. Patel AI, Grummon AH, Hampton KE, et al. A Trial of the Efficacy and Cost of Water Delivery Systems in San Francisco Bay Area Middle Schools, 2013. *Prev Chronic Dis* 2016;13:E88. doi: 10.5888/pcd13.160108
353. Paw MJMCA, Singh AS, Brug J, Mechelen Wv. Why did soft drink consumption decrease but screen time not? Mediating mechanisms in a school-based obesity prevention program.

- International Journal of Behavioral Nutrition and Physical Activity* 2008;5(41) doi: 10.1186/1479-5868-5-41
354. Perry CL, Sellers DE, Johnson C, et al. The Child and Adolescent Trial for Cardiovascular Health (CATCH): Intervention, Implementation, and Feasibility for Elementary Schools in the United States. *Health Education & Behavior* 1997;24(6):716-35. doi: 10.1177/109019819702400607
355. Poelman AAM, Cochet-Broch M, Wiggins B, et al. Effect of Experiential Vegetable Education Program on Mediating Factors of Vegetable Consumption in Australian Primary School Students: A Cluster-Randomized Controlled Trial. *Nutrients* 2020;12(8) doi: 10.3390/nu12082343
356. Prell HC, Berg MC, Jonsson LM, Lissner L. A school-based intervention to promote dietary change. *J Adolesc Health* 2005;36(6):529. doi: 10.1016/j.jadohealth.2004.08.009
357. Rabiei L, Masoudi R, Lotfizadeh M. Evaluation of the Effectiveness of Nutritional Education based on Health Belief Model on Self-Esteem and BMI of Overweight and at Risk of Overweight Adolescent Girls. *International Journal of Pediatrics-Mashhad* 2017;5(8):5419-30. doi: 10.22038/ijp.2017.24196.2037
358. Rennie LJ, Bazillier-Bruneau C, Rouëssé J. CaPSCA: evaluation of a Brief Cancer Prevention Education Programme to Promote Balanced Diet in French School Children. *Journal of Cancer Education* 2015;30(4):759-65. doi: 10.1007/s13187-014-0773-0
359. Reynolds KD, Franklin FA, Leviton LC, et al. Methods, results, and lessons learned from process evaluation of the high 5 school-based nutrition intervention. *Health Education & Behavior* 2000;27(2):177-86. doi: 10.1177/109019810002700204
360. Sahota P, Christian M, Day R, Cocks K. The feasibility and acceptability of a primary school-based programme targeting diet and physical activity: the PhunkyFoods Programme. *Pilot Feasibility Stud* 2019;5(- 1):152. doi: 10.1186/s40814-019-0542-2
361. Sahota P, Rudolf MCJ, Dixey R, et al. Evaluation of implementation and effect of primary school based intervention to reduce risk factors for obesity. *BMJ* 2001;323(7320):1027. doi: 10.1136/bmj.323.7320.1027
362. Said L, Gubbels JS, Kremers SPJ. Effect Evaluation of Sahtak bi Sahnak, a Lebanese Secondary School-Based Nutrition Intervention: A Cluster Randomised Trial. *Front Nutr* 2022;9:824020. doi: 10.3389/fnut.2022.824020
363. Shi-Chang X, Xin-Wei Z, Shui-Yang X, et al. Creating health-promoting schools in China with a focus on nutrition. *Health Promot Int* 2004;19(4):409-18. doi: 10.1093/heapro/dah402
364. St. Pierre RG, Cook TD, Straw RB. An evaluation of the nutrition education and training program: Findings from Nebraska. *Evaluation and Program Planning* 1981;4(3):335-44. doi: 10.1016/0149-7189(81)90032-X
365. Stone EJ, Norman JE, Davis SM, et al. Design, implementation, and quality control in the Pathways American-Indian multicenter trial. *Prev Med* 2003;37(6 Pt 2):S13-23. doi: 10.1016/j.ypmed.2003.08.006
366. Stone EJ, Osganian SK, McKinlay SM, et al. Operational design and quality control in the CATCH multicenter Trial. *Prev Med* 1996;25(4):384-99. doi: 10.1006/pmed.1996.0071
367. Sutherland R, Nathan N, Brown A, et al. A randomized controlled trial to assess the potential efficacy, feasibility and acceptability of an m-health intervention targeting parents of school



- aged children to improve the nutritional quality of foods packed in the lunchbox 'SWAP IT'. *Int J Behav Nutr Phys Act* 2019;16(1):54. doi: 10.1186/s12966-019-0812-7
368. Thomas LN, Hill TF, Gaines A, Dollahite JS. Implementing Smarter Lunchrooms Makeovers in New York state middle schools: an initial process evaluation. *Arch Public Health* 2016;74(41):41. doi: 10.1186/s13690-016-0153-9
369. Turnin MC, Tauber MT, Couvaras O, et al. Evaluation of microcomputer nutritional teaching games in 1,876 children at school. *Diabetes & Metabolism* 2001;27(4):459-64.
370. Tuuri G, Zanovec M, Silverman L, et al. "Smart Bodies" school wellness program increased children's knowledge of healthy nutrition practices and self-efficacy to consume fruit and vegetables. *Appetite* 2009;52(2):445-51. doi: 10.1016/j.appet.2008.12.007
371. Uys M, Draper CE, Hendricks S, et al. Impact of a South African School-based Intervention, HealthKick, on Fitness Correlates. *Am J Health Behav* 2016;40(1):55-66. doi: 10.5993/AJHB.40.1.7
372. Wang D, Stewart D, Chang C. Is an ecological school-based nutrition intervention effective to improve adolescents' nutrition-related knowledge, attitudes and behaviour in rural areas of China? *Global health promotion* 2017;24(4):81-89. doi: 10.1177/1757975915626864
373. Wang D, Stewart D, Yuan Y, Chang C. Do health-promoting schools improve nutrition in China? *Health promotion international* 2015;30(2):359-68. doi: 10.1093/heapro/dat047
374. Wang LY, Yang Q, Lowry R, Wechsler H. Economic analysis of a school-based obesity prevention program. *Obesity research* 2003;11(11):1313-24. doi: 10.1038/oby.2003.178
375. Wells NM, Myers BM, Henderson CR, Jr. School gardens and physical activity: a randomized controlled trial of low-income elementary schools. *Prev Med* 2014;69 Suppl 1:S27-33. doi: 10.1016/j.ypmed.2014.10.012
376. Wengreen HJ, Joyner D, Kimball SS, Schwartz S, Madden GJ. A Randomized Controlled Trial Evaluating the FIT Game's Efficacy in Increasing Fruit and Vegetable Consumption. *Nutrients* 2021;13(8) doi: 10.3390/nu13082646
377. Willi SM, Hirst K, Jago R, et al. Cardiovascular risk factors in multi-ethnic middle school students: the HEALTHY primary prevention trial. *Pediatric obesity* 2012;7(3):230-39. doi: 10.1111/j.2047-6310.2011.00042.x
378. Zhu WL, Feng NP, Ma J, Wang Y, Ye GJ. [The effect of dietary intervention on lipidemia in school-aged children]. *Zhonghua Liu Xing Bing Xue Za Zhi* 2003;24(9):794-7.
379. ACTRN12613000311752. Moving from policy to practice: A randomised trial of an implementation intervention to facilitate the adoption of a statewide healthy canteen policy in government primary schools [cited 2021 Sep 01]. Available from: <https://anzctr.org.au/ACTRN12613000311752.aspx>, 2013.
380. NCT02004977. Improving High School Breakfast Environments [cited 2021 Sep 01]. Available from: <https://ClinicalTrials.gov/show/NCT02004977>, 2013.
381. NCT03069274. Sugar-sweetened Beverage Intake Substitution by Water to Prevent Overweight in Mexican Children [cited 2021 Sep 01]. Available from: <https://ClinicalTrials.gov/show/NCT03069274>, 2015.

382. Amini M, Djazayeri A, Majdzadeh R, et al. A School-Based Intervention to Reduce Excess Weight in Overweight and Obese Primary School Students. *Biological research for nursing* 2016;18(5):531-40. doi: 10.1177/1099800416654261
383. Bagherniya M, Sharma M, Darani FM, et al. School-Based Nutrition Education Intervention Using Social Cognitive Theory for Overweight and Obese Iranian Adolescent Girls: A Cluster Randomized Controlled Trial. *International Quarterly of Community Health Education* 2017;38(1):37-45. doi: 10.1177/0272684x17749566
384. Bani Salameh A, Al-Sheyab N, El-Hneiti M, et al. Effectiveness of a 12-week school-based educational preventive programme on weight and fasting blood glucose in "at-risk" adolescents of type 2 diabetes mellitus: randomized controlled trial. *International journal of nursing practice* 2017;23(3) doi: 10.1111/ijn.12528
385. Coen Vd, Bourdeaudhuij Id, Vereecken C, et al. Effects of a 2-year healthy eating and physical activity intervention for 3-6-year-olds in communities of high and low socio-economic status: the POP (Prevention of Overweight among Pre-school and school children) project. *Public Health Nutr* 2012;15(9) doi: 10.1017/S1368980012000687
386. da Costa FF, Altenburg de Assis MA, González-Chica D, et al. Effect of school-based intervention on diet in high school students. *Revista Brasileira de Cineantropometria & Desempenho Humano* 2014;16:36-45. doi: 10.5007/1980-0037.2014v16s1p36
387. Gomes de Souza RA, Mediano MF, Souza Ade M, Sichieri R. Reducing the use of sugar in public schools: a randomized cluster trial. *Rev Saude Publica* 2013;47(4):666-74. doi: 10.1590/s0034-8910.2013047002988
388. Graf C, Koch B, Bjarnason-Wehrens B, et al. Who benefits from intervention in, as opposed to screening of, overweight and obese children? *Cardiology in the Young* 2006;16(5):474-80. doi: 10.1017/S1047951106000667
389. Grey M, Berry D, Davidson M, et al. Preliminary testing of a program to prevent type 2 diabetes among high-risk youth. *Journal of School Health* 2004;74(1):10-15. doi: 10.1111/j.1746-1561.2004.tb06595.x
390. Guo H, Zeng X, Zhuang Q, Zheng Y, Chen S. Intervention of childhood and adolescents obesity in Shantou city. *Obes Res Clin Pract* 2015;9(4):357-64. doi: 10.1016/j.orcp.2014.11.006
391. Hao M, Han W, Yamauchi T. Short-term and long-term effects of a combined intervention of rope skipping and nutrition education for overweight children in Northeast China. *Asia Pacific Journal of Public Health* 2019;31(4):348-58. doi: 10.1177/1010539519848275
392. Harrell JS, Gansky SA, McMurray RG, et al. School-based interventions improve heart health in children with multiple cardiovascular disease risk factors. *Pediatrics* 1998;102(2):371-80. doi: 10.1542/peds.102.2.371
393. Hoffman JA, Thompson DR, Franko DL, et al. Decaying behavioral effects in a randomized, multi-year fruit and vegetable intake intervention. *Prev Med* 2011;52(5):370-5. doi: 10.1016/j.ypmed.2011.02.013
394. Ickovics JR, Duffany KO, Shebl FM, et al. Implementing School-Based Policies to Prevent Obesity: Cluster Randomized Trial. *Am J Prev Med* 2019;56(1):e1-e11. doi: 10.1016/j.amepre.2018.08.026

395. Kain J, Concha F, Moreno L, Leyton B. School-based obesity prevention intervention in Chilean children: effective in controlling, but not reducing obesity. *J Obes* 2014;2014:618293. doi: 10.1155/2014/618293
396. Kaufman-Shriqui V, Fraser D, Friger M, et al. Effect of a school-based intervention on nutritional knowledge and habits of low-socioeconomic school children in Israel: a cluster-randomized controlled trial. *Nutrients* 2016;8(4):234. doi: 10.3390/nu8040234
397. Landry MJ, Markowitz AK, Asigbee FM, et al. Cooking and Gardening Behaviors and Improvements in Dietary Intake in Hispanic/Latino Youth. *Child Obes* 2019;15(4):262-70. doi: 10.1089/chi.2018.0110
398. Lee A, Ho M, Keung VM, Kwong AC. Childhood obesity management shifting from health care system to school system: intervention study of school-based weight management programme. *BMC Public Health* 2014;14:1128. doi: 10.1186/1471-2458-14-1128
399. Lee RL, Leung C, Chen H, et al. The Impact of a School-Based Weight Management Program Involving Parents via mHealth for Overweight and Obese Children and Adolescents with Intellectual Disability: a Randomized Controlled Trial. *International journal of environmental research and public health* 2017;14(10):1178. doi: 10.3390/ijerph14101178
400. Manios Y, Lambrinou CP, Mavrogianni C, et al. Lifestyle Changes Observed among Adults Participating in a Family- and Community-Based Intervention for Diabetes Prevention in Europe: The 1st Year Results of the Feel4Diabetes-Study. *Nutrients* 2020;12(7) doi: 10.3390/nu12071949
401. Nyberg G, Norman A, Sundblom E, Zeebari Z, Elinder LS. Effectiveness of a universal parental support programme to promote health behaviours and prevent overweight and obesity in 6-year-old children in disadvantaged areas, the Healthy School Start Study II, a cluster-randomised controlled trial. *Int J Behav Nutr Phys Act* 2016;13(- 4):4. doi: 10.1186/s12966-016-0327-4
402. Panunzio MF, Antoniciello A, Pisano A, Dalton S. Nutrition education intervention by teachers may promote fruit and vegetable consumption in Italian students. *Nutrition Research* 2007;27(9):524-28. doi: 10.1016/j.nutres.2007.06.012
403. Pbert L, Druker S, Barton B, et al. A school-based program for overweight and obese adolescents: a randomized controlled trial. *Journal of School Health* 2016;86(10):699-708. doi: 10.1111/josh.12428
404. Shang XW, Li YP, Xu HQ, et al. Effect of multidimensional lifestyle interventions on metabolic risk reduction in children: a cluster randomised controlled trial. *Preventive Medicine* 2020;133 doi: 10.1016/j.ypmed.2020.106010
405. Stice E, Rohde P, Shaw H, Marti CN. Efficacy Trial of a Selective Prevention Program Targeting Both Eating Disorders and Obesity Among Female College Students: 1- and 2-Year Follow-Up Effects. *Journal of Consulting and Clinical Psychology* 2013;81(1):183-89. doi: 10.1037/a0031235
406. Story M, Hannan PJ, Fulkerson JA, et al. Bright Start: description and main outcomes from a group-randomized obesity prevention trial in American Indian children. *Obesity* 2012;20(11):2241-49. doi: 10.1038/oby.2012.89
407. Toral N, Slater B. Intervention based exclusively on stage-matched printed educational materials regarding healthy eating does not result in changes to adolescents' dietary behavior. *The Scientific World Journal* 2012;2012 doi: 10.1100/2012/174640

408. Toruner EK, Savaser S. A controlled evaluation of a school-based obesity prevention in Turkish school children. *The Journal of School Nursing* 2010;26(6):473-82. doi: 10.1177/1059840510383987
409. van de Gaar VM, Jansen W, van Grieken A, et al. Effects of an intervention aimed at reducing the intake of sugar-sweetened beverages in primary school children: a controlled trial. *International Journal of Behavioral Nutrition and Physical Activity* 2014;11(1):1-12. doi: 10.1186/s12966-014-0098-8
410. Wang D, Stewart D, Chang C. School-based intervention for nutrition promotion in Mi Yun County, Beijing, China: Does a health-promoting school approach improve parents' knowledge, attitudes and behaviour? *Health Education* 2016;116(3) doi: 10.1108/HE-02-2015-0007
411. Wright K, Giger JN, Norris K, Suro Z. Impact of a nurse-directed, coordinated school health program to enhance physical activity behaviors and reduce body mass index among minority children: A parallel-group, randomized control trial. *International Journal of Nursing Studies* 2013;50(6):727-37. doi: 10.1016/j.ijnurstu.2012.09.004
412. Yang F, Wang W, Guo H, et al. Effects of comprehensive intervention on overweight or obese students of primary schools in a district of Shanghai. *Journal of Environmental & Occupational Medicine* 2013;30(5):333-37.
413. Gatto NM, Martinez LC, Spruijt-Metz D, Davis JN. LA sprouts randomized controlled nutrition, cooking and gardening programme reduces obesity and metabolic risk in Hispanic/Latino youth. *Pediatric obesity* 2017;12(1):28-37. doi: 10.1111/ijpo.12102
414. Giles CM, Kenney EL, Gortmaker SL, et al. Increasing water availability during afterschool snack: evidence, strategies, and partnerships from a group randomized trial. *Am J Prev Med* 2012;43(3 Suppl 2):S136-42. doi: 10.1016/j.amepre.2012.05.013
415. Pearson N, Biddle SJH, Griffiths P, et al. Reducing screen-time and unhealthy snacking in 9-11 year old children: the Kids FIRST pilot randomised controlled trial. *Bmc Public Health* 2020;20(1) doi: 10.1186/s12889-020-8232-9
416. Pedrosa C, Oliveira BM, Albuquerque I, et al. Metabolic syndrome, adipokines and ghrelin in overweight and obese schoolchildren: results of a 1-year lifestyle intervention programme. *European journal of pediatrics* 2011;170(4):483-92. doi: 10.1007/s00431-010-1316-2
417. Sharma SV, Shegog R, Chow J, et al. Effects of the Quest to Lava Mountain Computer Game on Dietary and Physical Activity Behaviors of Elementary School Children: A Pilot Group-Randomized Controlled Trial. *J Acad Nutr Diet* 2015;115(8):1260-71. doi: 10.1016/j.jand.2015.02.022
418. Annan RA, Apprey C, Agyemang GO, et al. Nutrition education improves knowledge and BMI-for-age in Ghanaian school-aged children. *Afr Health Sci* 2021;21(2):927-41. doi: 10.4314/ahs.v21i2.55
419. Forneris T, Fries E, Meyer A, et al. Results of a rural school-based peer-led intervention for youth: goals for health. *J Sch Health* 2010;80(2):57-65. doi: 10.1111/j.1746-1561.2009.00466.x
420. Just DR, Price J. Using Incentives to Encourage Healthy Eating in Children. *Journal of Human Resources* 2013;48(4):855-72.

421. Schreinemachers P, Bhattarai DR, Subedi GD, et al. Impact of school gardens in Nepal: a cluster randomised controlled trial. *Journal of Development Effectiveness* 2017;9(3):329-43. doi: 10.1080/19439342.2017.1311356
422. Schreinemachers P, Ouedraogo MS, Diabougou S, et al. Impact of school gardens and complementary nutrition education in Burkina Faso. *Journal of Development Effectiveness* 2019;11(2):132-45. doi: 10.1080/19439342.2019.1624595
423. Schreinemachers P, Rai BB, Dorji D, et al. School gardening in Bhutan: Evaluating outcomes and impact. *Food Security* 2017;9(3):635-48. doi: 10.1007/s12571-017-0673-3
424. Shrestha A, Schindler C, Odermatt P, et al. Nutritional and health status of children 15 months after integrated school garden, nutrition, and water, sanitation and hygiene interventions: a cluster-randomised controlled trial in Nepal. *BMC public health* 2020;20(158) doi: 10.1186/s12889-019-8027-z
425. Wells NM, Meyers BM, Todd LE, et al. The carry-over effects of school gardens on fruit and vegetable availability at home: A randomized controlled trial with low-income elementary schools. *Prev Med* 2018;112:152-59. doi: 10.1016/j.ypmed.2018.03.022
426. Barnes C, Hall A, Nathan N, et al. Efficacy of a school-based physical activity and nutrition intervention on child weight status: Findings from a cluster randomized controlled trial. *Prev Med* 2021;153:106822. doi: 10.1016/j.ypmed.2021.106822
427. Briancon S, Legrand K, Muller L, et al. Effectiveness of a socially adapted intervention in reducing social inequalities in adolescence weight. The PRALIMAP-IN'S school-based mixed trial. *International Journal of Obesity* 2020;44(4):895-907. doi: 10.1038/s41366-020-0520-z
428. Dreyhaupt J, Koch B, Wirt T, et al. Evaluation of a health promotion program in children: study protocol and design of the cluster-randomized Baden-Württemberg primary school study. *BMC Public Health* 2012;12(1):1-12.
429. Haerens L, Bourdeaudhuij Id, Maes L, et al. The effects of a middle-school healthy eating intervention on adolescents' fat and fruit intake and soft drinks consumption. *Public health nutrition* 2007;10(5):443-49. doi: 10.1017/S1368980007219652
430. Kobel S, Kesztyus D, Steinacker JM. Teacher-Based Health Promotion in Primary School Children in Baden-Württemberg: effects on Endurance Performance and Incidence of Abdominal Obesity. *Gesundheitswesen (Bundesverband der Ärzte des Öffentlichen Gesundheitsdienstes (Germany))* 2019 doi: 10.1055/a-0921-7076
431. Llauradó E, Aceves-Martins M, Tarro L, et al. A youth-led social marketing intervention to encourage healthy lifestyles, the EYTO (European Youth Tackling Obesity) project: a cluster randomised controlled trial in Catalonia, Spain. *BMC Public Health* 2015;15(1):1-12. doi: 10.1186/s12889-015-1920-1
432. Luepker RV, Perry CL, McKinlay SM, et al. Outcomes of a field trial to improve children's dietary patterns and physical activity. The Child and Adolescent Trial for Cardiovascular Health. CATCH collaborative group. *Jama* 1996;275(10):768-76. doi: 10.1001/jama.1996.03530340032026
433. Nader PR, Stone EJ, Lytle LA, et al. Three-year maintenance of improved diet and physical activity - The CATCH cohort. *Archives of Pediatrics & Adolescent Medicine* 1999;153(7):695-704. doi: 10.1001/archpedi.153.7.695

434. Perry CL, Bishop DB, Taylor GL, et al. A randomized school trial of environmental strategies to encourage fruit and vegetable consumption among children. *Health education & behavior* 2004;31(1):65-76. doi: 10.1177/1090198103255530
435. Taghdisi MH, Babazadeh T, Moradi F, Shariat F. Effect of Educational Intervention on the Fruit and Vegetables Consumption among the Students: Applying Theory of Planned Behavior. *J Res Health Sci* 2016;16(4):195-99.
436. Trevino RP, Yin ZY, Hernandez A, et al. Impact of the Bienestar school-based diabetes mellitus prevention program on fasting capillary glucose levels - A randomized controlled trial. *Archives of Pediatrics & Adolescent Medicine* 2004;158(9):911-17. doi: 10.1001/archpedi.158.9.911
437. ACTRN12605000578606. Preventing obesity in children via environmental intervention: the APPLE study [cited 2021 Sep 01]. Available from: <https://anzctr.org.au/ACTRN12605000578606.aspx>, 2005.
438. ACTRN12617001213336. A cluster randomised controlled trial of a sugar-sweetened beverage intervention in secondary schools [cited 2021 Sep 01]. Available from: <https://anzctr.org.au/ACTRN12617001213336.aspx>, 2017.
439. NCT00554294. Promoting Water Consumption for Prevention of Overweight in School Children in a Controlled Intervention Trial [cited 2021 Sep 01]. Available from: <https://ClinicalTrials.gov/show/NCT00554294>, 2006.
440. NCT01924130. School Breakfast Policy Initiative Study [cited 2021 Sep 01]. Available from: <https://ClinicalTrials.gov/show/NCT01924130>, 2012.
441. NCT02043626. Study to Evaluate the Health and Wellness Policies of the New Haven Public School District [cited 2021 Sep 01]. Available from: <https://ClinicalTrials.gov/show/NCT02043626>, 2011.
442. NCT02653352. Prevention of Excessive Weight Gain by Discouraging Students From Drinking Sodas [cited 2021 Sep 01]. Available from: <https://ClinicalTrials.gov/show/NCT02653352>, 2005.
443. NCT03355131. Systems-oriented School Healthy Weight Promotion Based on NASA Mission X Campaign [cited 2021 Sep 01]. Available from: <https://ClinicalTrials.gov/show/NCT03355131>, 2016.
444. Adab P, Pallan MJ, Lancashire ER, et al. A cluster-randomised controlled trial to assess the effectiveness and cost-effectiveness of a childhood obesity prevention programme delivered through schools, targeting 6-7 year old children: the WAVES study protocol. *BMC Public Health* 2015;15(488):1-10. doi: 10.1186/s12889-015-1800-8
445. Adab P, Pallan MJ, Lancashire ER, et al. A cluster-randomised controlled trial to assess the effectiveness and cost-effectiveness of a childhood obesity prevention programme delivered through schools, targeting 6-7 year old children: the WAVES study protocol. *Bmc Public Health* 2016;15(1):1-10. doi: 10.1186/s12889-015-1800-8
446. Adams MA, Ohri-Vachaspati P, Richards TJ, Todd M, Bruening M. Design and rationale for evaluating salad bars and students' fruit and vegetable consumption: a cluster randomized factorial trial with objective assessments. *Contemporary clinical trials* 2019;77:37-45. doi: 10.1016/j.cct.2018.12.007

447. Barbosa Filho VC, Lopes Ada S, Lima AB, et al. Rationale and methods of a cluster-randomized controlled trial to promote active and healthy lifestyles among Brazilian students: the "Fortaleca sua Saude" program. *BMC Public Health* 2015;15(1212):1212. doi: 10.1186/s12889-015-2543-2
448. Berry DC, McMurray R, Schwartz TA, et al. Rationale, design, methodology and sample characteristics for the family partners for health study: a cluster randomized controlled study. *Public Health* 2012;12(1):1-13.
449. Bonnesen CT, Toftager M, Madsen KR, et al. Study protocol of the Healthy High School study: a school-based intervention to improve well-being among high school students in Denmark. *BMC public health* 2020;20(1):1-16. doi: 10.1186/s12889-020-8194-y
450. Briançon S, Bonsergent E, Agrinier N, et al. PRALIMAP: study protocol for a high school-based, factorial cluster randomised interventional trial of three overweight and obesity prevention strategies. *Trials* 2010;11(1):1-15. doi: 10.1186/1745-6215-11-119
451. Bustos N, Olivares S, Leyton B, Cano M, Albala C. Impact of a school-based intervention on nutritional education and physical activity in primary public schools in Chile (KIND) programme study protocol: cluster randomised controlled trial. *BMC Public Health* 2016;16(1):1-11. doi: 10.1186/s12889-016-3878-z
452. Caballero B, Davis S, Davis CE, et al. Pathways: A school-based program for the primary prevention of obesity in American Indian children. *Journal of Nutritional Biochemistry* 1998;9(9):535-43. doi: 10.1016/s0955-2863(98)00049-7
453. Chen Y, Ma L, Ma Y, et al. A national school-based health lifestyles interventions among Chinese children and adolescents against obesity: rationale, design and methodology of a randomized controlled trial in China. *BMC public health* 2015;15(1):1-10. doi: 10.1186/s12889-015-1516-9
454. Christian MS, Evans CEL, Conner MT, Ransley JK, Cade JE. Study Protocol. Can a school gardening intervention improve children's diets? *BMC Public Health* 2012;12(1):1-8. doi: 10.1186/1471-2458-12-304
455. Cunha DB, Verly Junior E, Paravidino VB, et al. Design of a school randomized trial for nudging students towards healthy diet and physical activity to prevent obesity: PAAPAS Nudge study protocol. *Medicine* 2017;96(50) doi: 10.1097/MD.00000000000008898
456. Cunningham-Sabo L, Lohse B, Smith S, et al. Fuel for Fun: a cluster-randomized controlled study of cooking skills, eating behaviors, and physical activity of 4th graders and their families. *Bmc Public Health* 2016;16(1):1-15. doi: 10.1186/s12889-016-3118-6
457. Damsgaard CT, Dalskov SM, Petersen RA, et al. Design of the OPUS School Meal Study: a randomised controlled trial assessing the impact of serving school meals based on the New Nordic Diet. *Scandinavian journal of public health* 2012;40(8):693-703. doi: 10.1177/1403494812463173
458. Davis AM, Beaver G, Dreyer Gillette M, et al. iAmHealthy: rationale, design and application of a family-based mHealth pediatric obesity intervention for rural children. *Contemporary clinical trials* 2019;78:20-26. doi: 10.1016/j.cct.2019.01.001
459. Draper CE, de Villiers A, Lambert EV, et al. HealthKick: a nutrition and physical activity intervention for primary schools in low-income settings. *BMC Public Health* 2010;10(1):1-12. doi: 10.1186/1471-2458-10-398

460. Dreyhaupt J, Koch B, Wirt T, et al. Evaluation of a health promotion program in children: Study protocol and design of the cluster-randomized Baden-Württemberg primary school study DRKS-ID: DRKS00000494. *Bmc Public Health* 2012;12(1):1-12.
461. Dukhi N, Sartorius B, Taylor M. A behavioural change intervention study for the prevention of childhood obesity in South Africa: protocol for a randomized controlled trial. *BMC public health* 2020;20(1):1-11. doi: 10.1186/s12889-020-8272-1
462. Dzewaltowski DA, Estabrooks PA, Johnston JA. Healthy Youth Places promoting nutrition and physical activity. *Health Education Research* 2002;17(5):541-51. doi: 10.1093/her/17.5.541
463. Eisenmann JC, Gentile DA, Welk GJ, et al. SWITCH: rationale, design, and implementation of a community, school, and family-based intervention to modify behaviors related to childhood obesity. *BMC Public health* 2008;8(1):1-10. doi: 10.1186/1471-2458-8-223
464. Elinder LS, Patterson E, Nyberg G, Norman Å. A Healthy School Start Plus for prevention of childhood overweight and obesity in disadvantaged areas through parental support in the school setting - study protocol for a parallel group cluster randomised trial. *BMC Public Health* 2018;18(1):1-13. doi: 10.1186/s12889-018-5354-4
465. Evans A, Ranjit N, Hoelscher D, et al. Impact of school-based vegetable garden and physical activity coordinated health interventions on weight status and weight-related behaviors of ethnically diverse, low-income students: Study design and baseline data of the Texas, Grow! Eat! Go! (TGEG) cluster-randomized controlled trial. *BMC Public Health* 2016;16(1):973. doi: 10.1186/s12889-016-3453-7
466. Ezendam NP, Oenema A, van de Looij-Jansen PM, Brug J. Design and evaluation protocol of "FATaintPHAT", a computer-tailored intervention to prevent excessive weight gain in adolescents. *BMC public health* 2007;7(1):1-10. doi: 10.1186/1471-2458-7-324
467. Fernandez-Jimenez R, Santos-Beneit G, Tresserra-Rimbau A, et al. Rationale and design of the school-based SI! Program to face obesity and promote health among Spanish adolescents: a cluster-randomized controlled trial. *American heart journal* 2019;215:27-40. doi: 10.1016/j.ahj.2019.03.014
468. Folkvord F. Systematically testing the effects of promotion techniques on children's fruit and vegetables intake on the long term: a protocol study of a multicenter randomized controlled trial. *BMC public health* 2019;19(1):1-7. doi: 10.1186/s12889-019-7952-1
469. Friedrich RR, Caetano LC, Schiffner MD, Wagner MB, Schuch I. Design, randomization and methodology of the TriAtiva Program to reduce obesity in school children in Southern Brazil. *BMC Public Health* 2015;15(1):1-8. doi: 10.1186/s12889-015-1727-0
470. Gillis B, Mobley C, Stadler DD, et al. Rationale, design and methods of the HEALTHY study nutrition intervention component. *International Journal of Obesity* 2009;33(4):29-36. doi: 10.1038/ijo.2009.114
471. Giralt M, Albaladejo R, Tarro L, et al. A primary-school-based study to reduce prevalence of childhood obesity in Catalunya (Spain) - EDAL-Educacio en alimentacio: study protocol for a randomised controlled trial. *Trials* 2011;12 doi: 10.1186/1745-6215-12-54
472. Graham D, Appleton S, Rush E, et al. Increasing activity and improving nutrition through a schools-based programme: Project Energize. 1. Design, programme, randomisation and evaluation methodology. *Public Health Nutrition* 2008;11(10):1076-84. doi: 10.1017/S136898000700153X



473. Healthy Study Group, Hirst K, Baranowski T, et al. HEALTHY study rationale, design and methods: moderating risk of type 2 diabetes in multi-ethnic middle school students. *Int J Obes (Lond)* 2009;33 Suppl 4(4):S4-20. doi: 10.1038/ijo.2009.112
474. Hopkins LC, Fristad M, Goodway JD, et al. Camp NERF: methods of a theory-based nutrition education recreation and fitness program aimed at preventing unhealthy weight gain in underserved elementary children during summer months. *Bmc Public Health* 2016;16(1):1-12. doi: 10.1186/s12889-016-3765-7
475. Hoppu U, Lehtisalo J, Tapanainen H, Pietinen P. Dietary habits and nutrient intake of Finnish adolescents. *Public Health Nutr* 2010a;13(6a):965-72. doi: 10.1017/s1368980010001175
476. Jansen W, Raat H, Joosten-van Zwanenburg E, et al. A school-based intervention to reduce overweight and inactivity in children aged 6-12 years: study design of a randomized controlled trial. *BMC Public Health* 2008;8(1):1-9. doi: 10.1186/1471-2458-8-257
477. Jones Bell M, Zeiler M, Herrero R, et al. Healthy Teens @ School: Evaluating and disseminating transdiagnostic preventive interventions for eating disorders and obesity for adolescents in school settings. *Internet Interv* 2019;16:65-75. doi: 10.1016/j.invent.2018.02.007
478. Kajons N, David M, Gowland-Ella J, Lewis P, Batchelor S. Thirsty? Choose Water! Behavioural interventions and water stations in secondary schools a two-by-two factorial randomised controlled trial. *BMC Public Health* 2018;18(1):788. doi: 10.1186/s12889-018-5685-1
479. Kitchen MS, Ransley JK, Greenwood DC, et al. - Study protocol: a cluster randomised controlled trial of a school based fruit and vegetable intervention - Project Tomato. 2009;- 9(- 101)
480. Krølner R, Suldrup Jørgensen T, Aarestrup AK, et al. The Boost study: design of a school- and community-based randomised trial to promote fruit and vegetable consumption among teenagers. *BMC public health* 2012;12(1):1-25.
481. Kubik MY, Fulkerson JA, Sirard JR, et al. School-based secondary prevention of overweight and obesity among 8- to 12-year old children: Design and sample characteristics of the SNAPSHOT trial. *Contemporary clinical trials* 2018;75:9-18. doi: 10.1016/j.cct.2018.10.011
482. La Torre G, Mannocci A, Saulle R, et al. GiochiAMO! The protocol of a school based intervention for the promotion of physical activity and nutrition among children. *La Clinica Terapeutica* 2016;167(5):152-55. doi: 10.7417/ct.2016.1947
483. Lane HG, Deitch R, Wang Y, et al. "Wellness Champions for Change," a multi-level intervention to improve school-level implementation of local wellness policies: study protocol for a cluster randomized trial. *Contemporary clinical trials* 2018;75:29-39. doi: 10.1016/j.cct.2018.10.008
484. Lawlor DA, Jago R, Noble SM, et al. The Active for Life Year 5 (AFLY5) school based cluster randomised controlled trial: study protocol for a randomized controlled trial. *Trials* 2011;12(1):1-13. doi: 10.1186/1745-6215-12-181
485. Leme AC, Philippi ST. The "Healthy Habits, Healthy Girls" randomized controlled trial for girls: study design, protocol, and baseline results. *Cadernos de Saúde Pública* 2015;31(7):1381-94. doi: 10.1590/0102-311X00136014
486. Li B, Liu WJ, Adab P, et al. Cluster-randomised controlled trial to assess the effectiveness and cost-effectiveness of an obesity prevention programme for Chinese primary school-aged children: the CHIRPY DRAGON study protocol. *BMJ open* 2017;7(11) doi: 10.1136/bmjopen-2017-018415

487. Li Y, Hu X, Zhang Q, et al. The nutrition-based comprehensive intervention study on childhood obesity in China (NISCOC): a randomised cluster controlled trial. *BMC Public Health* 2010;10(- 229):229. doi: 10.1186/1471-2458-10-229
488. Lien N, Bjelland M, Bergh IH, et al. Design of a 20-month comprehensive, multicomponent school-based randomised trial to promote healthy weight development among 11-13 year olds: the HEalth In Adolescents study. *Scandinavian Journal of Public Health* 2010;38(5):38-51. doi: 10.1177/1403494810379894
489. Liu Z, Wu Y, Niu WY, et al. A school-based, multi-faceted health promotion programme to prevent obesity among children: protocol of a cluster-randomised controlled trial (the DECIDE-Children study). *BMJ open* 2019;9(11) doi: 10.1136/bmjopen-2018-027902
490. Llauro E, Aceves-Martins M, Tarro L, et al. A youth-led social marketing intervention to encourage healthy lifestyles, the EYTO (European Youth Tackling Obesity) project: a cluster randomised controlled trial in Catalonia, Spain. *Bmc Public Health* 2015;15(607) doi: 10.1186/s12889-015-1920-1
491. Lubans DR, Morgan PJ, Dewar D, et al. The Nutrition and Enjoyable Activity for Teen Girls (NEAT Girls) randomized controlled trial for adolescent girls from disadvantaged secondary schools: rationale, study protocol, and baseline results. *BMC Public Health* 2010;10(1):1-14. doi: 10.1186/1471-2458-10-652
492. Magalhaes P, Silva C, Pereira B, et al. An online-based intervention to promote healthy eating through self-regulation among children: study protocol for a randomized controlled trial. *Trials* 2020;21(1) doi: 10.1186/s13063-020-04685-5
493. Martinez LC, Gatto NM, Spruijt-Metz D, Davis JN. Design and methodology of the LA Sprouts nutrition, cooking and gardening program for Latino youth: A randomized controlled intervention. *Contemp Clin Trials* 2015;42:219-27. doi: 10.1016/j.cct.2015.04.008
494. Mohammadi S, Su TT, Jalaludin MY, et al. School-Based Intervention to Improve Healthy Eating Practices Among Malaysian Adolescents: A Feasibility Study Protocol. *Frontiers in Public Health* 2020;8:555. doi: 10.3389/fpubh.2020.549637
495. Moore L, Paisley CM, Dennehy A. Are fruit tuck shops in primary schools effective in increasing pupils' fruit consumption? A randomised controlled trial. *Nutrition & Food Science* 2000;30(1)
496. Moore SM, Borawski EA, Cuttler L, Ievers-Landis CE, Love TE. IMPACT: a multi-level family and school intervention targeting obesity in urban youth. *Contemp Clin Trials* 2013;36(2):574-86. doi: 10.1016/j.cct.2013.08.009
497. Muzaffar H, Nickols-Richardson SM. PAWS (Peer-education About Weight Steadiness) club: rationale and design for a randomized controlled study. *The FASEB Journal* 2016;30:676. doi: 10.1096/fasebj.30.1\_supplement.676.2
498. Myers EF, Gerstein DE, Foster J, et al. Energy balance for kids with play: design and implementation of a multi-component school-based obesity prevention program. *Childhood Obesity* 2014;10(3):251-59.
499. Ooi J, Sutherland R, Nathan N, et al. A cluster randomised controlled trial of a sugar-sweetened beverage intervention in secondary schools: pilot study protocol. *Nutrition and health* 2018;24(4):217-29. doi: 10.1177/0260106018791856

500. Reynolds KD, Raczynski JM, Binkley D, et al. Design of "High 5": a school-based study to promote fruit and vegetable consumption for reduction of cancer risk. *Journal of Cancer Education* 1998;13(3):169-77. doi: 10.1080/08858199809528539
501. Rosenbaum M, Accacha SD, Altshuler LA, et al. The Reduce Obesity and Diabetes (ROAD) project: design and methodological considerations. *Childhood Obesity* 2011;7(3):223-34. doi: 10.1089/chi.2011.0014
502. Safdie M, Levesque L, Gonzalez-Casanova I, et al. Promoting healthful diet and physical activity in the Mexican school system for the prevention of obesity in children. *Salud Publica Mex* 2013;55 Suppl 3(- Suplemento 3):357-73. doi: 10.21149/spm.v55s3.5137
503. Salmoirago-Blotcher E, Druker S, Meyer F, et al. Design and methods for "Commit to Get Fit" - a pilot study of a school-based mindfulness intervention to promote healthy diet and physical activity among adolescents. *Contemporary clinical trials* 2015;41:248-58. doi: 10.1016/j.cct.2015.02.004
504. Santos-Beneit G, Bodega P, de Miguel M, et al. Rationale and design of the SI! Program for health promotion in elementary students aged 6 to 11 years: A cluster randomized trial. *Am Heart J* 2019;210:9-17. doi: 10.1016/j.ahj.2018.12.011
505. Scherr RE, Linnell JD, Smith MH, et al. The Shaping Healthy Choices Program: design and implementation methodologies for a multicomponent, school-based nutrition education intervention. *J Nutr Educ Behav* 2014;46(6):e13-21. doi: 10.1016/j.jneb.2014.08.010
506. Schuh DS, Goulart MR, Barbiero SM, et al. Healthy School, Happy School: design and Protocol for a Randomized Clinical Trial Designed to Prevent Weight Gain in Children. *Arquivos brasileiros de cardiologia* 2017;108(6):501-07.
507. Siegrist M, Hanssen H, Lammel C, Haller B, Halle M. A cluster randomised school-based lifestyle intervention programme for the prevention of childhood obesity and related early cardiovascular disease (JuvenTUM 3). *BMC Public Health* 2011;11:258. doi: 10.1186/1471-2458-11-258
508. Singh AS, Chin A Paw MJM, Kremers SPJ, et al. Design of the Dutch Obesity Intervention in Teenagers (NRG-DOiT): systematic development, implementation and evaluation of a school-based intervention aimed at the prevention of excessive weight gain in adolescents. *BMC public health* 2006;6(1):1-15. doi: 10.1186/1471-2458-6-304
509. Slawson DL, Dalton WT, Dula TM, et al. College students as facilitators in reducing adolescent obesity disparity in Southern Appalachia: Team Up for Healthy Living. *Contemporary Clinical Trials* 2015;43:39-52. doi: 10.1016/j.cct.2015.04.012
510. Sutherland R, Brown A, Nathan N, et al. Protocol for an effectiveness- implementation hybrid trial to assess the effectiveness and cost-effectiveness of an m-health intervention to decrease the consumption of discretionary foods packed in school lunchboxes: the 'SWAP IT' trial. *BMC public health* 2019;19(1):1-11. doi: 10.1186/s12889-019-7725-x
511. Tarro L, Aceves-Martins M, Papell-Garcia I, et al. A youth-led, social marketing intervention run by adolescents to encourage healthy lifestyles among younger school peers (EYTO-kids project): a protocol for pilot cluster randomized controlled trial (Spain). *International journal of environmental research and public health* 2017;14(8):923. doi: 10.3390/ijerph14080923
512. Teesson M, Champion KE, Newton NC, et al. Study protocol of the Health4Life initiative: a cluster randomised controlled trial of an eHealth school-based program targeting multiple

- lifestyle risk behaviours among young Australians. *BMJ open* 2020;10(7) doi: 10.1136/bmjopen-2019-035662
513. Tzelepis F, Paul CL, Wiggers J, et al. Targeting multiple health risk behaviours among vocational education students using electronic feedback and online and telephone support: protocol for a cluster randomised trial. *BMC Public Health* 2015;15(1):550. doi: 10.1186/s12889-015-1898-8
514. van Dongen BM, Ridder MAM, Steenhuis IHM, Renders CM. Background and evaluation design of a community-based health-promoting school intervention: fit Lifestyle at School and at Home (FLASH). *BMC public health* 2019;19(1):1-11. doi: 10.1186/s12889-019-7088-3
515. Van Lippevelde W, Vangeel J, De Cock N, et al. Using a gamified monitoring app to change adolescents' snack intake: the development of the REWARD app and evaluation design. *BMC public health* 2016;16(1):1-11. doi: 10.1186/s12889-016-3286-4
516. van Nassau F, Singh AS, van Mechelen W, et al. Exploring facilitating factors and barriers to the nationwide dissemination of a Dutch school-based obesity prevention program "DOiT": a study protocol. *BMC Public Health* 2013;13(1):1-11. doi: 10.1186/1471-2458-13-1201
517. Wang Y, Tussing L, Odoms-Young A, et al. Obesity prevention in low socioeconomic status urban African-american adolescents: study design and preliminary findings of the HEALTH-KIDS Study. *European journal of clinical nutrition* 2006;60(1):92-103. doi: 10.1038/sj.ejcn.1602272
518. Weigensberg MJ, Spruijt-Metz D, Wen CKF, et al. Protocol for the Imagine HEALTH Study: guided imagery lifestyle intervention to improve obesity-related behaviors and salivary cortisol patterns in predominantly Latino adolescents. *Contemporary clinical trials* 2018;72:103-16. doi: 10.1016/j.cct.2018.07.009
519. Williamson DA, Champagne CM, Harsha D, et al. Louisiana (LA) Health: design and methods for a childhood obesity prevention program in rural schools. *Contemporary clinical trials* 2008;29(5):783-95. doi: 10.1016/j.cct.2008.03.004
520. Xu F, Ware RS, Tse L, et al. A school-based comprehensive lifestyle intervention among Chinese kids against obesity (CLICKObesity): rationale, design and methodology of a randomized controlled trial in Nanjing city, China. *BMC Public Health* 2012;12(316):1-8. doi: 10.1186/1471-2458-12-316
521. Yin ZN, Hanes J, Moore JB, et al. An after-school physical activity program for obesity prevention in children - The Medical college of Georgia FitKid Project. *Evaluation & the Health Professions* 2005;28(1):67-89. doi: 10.1177/0163278704273079
522. Zoellner JM, Porter KJ, You W, et al. Kids SIPsmartER, a cluster randomized controlled trial and multi-level intervention to improve sugar-sweetened beverages behaviors among Appalachian middle-school students: Rationale, design & methods. *Contemporary clinical trials* 2019;83:64-80. doi: 10.1016/j.cct.2019.06.011
523. NCT03128775. Nudging Students Towards Healthy Diet and Physical Activity to Prevent Obesity [cited 2021 Sep 01]. Available from: <https://ClinicalTrials.gov/show/NCT03128775>, 2018.
524. U1111-1155-7731. RBR-97bztb Program for health promotion in schools of public elementary school in the state of Rio Grande do Sul [cited 2021 Sep 01]. Available from: <http://ensaiosclinicos.gov.br/rg/RBR-97bztb>, 2015.

525. Aceves-Martins M, Llauro E, Tarro L, et al. Effectiveness of social marketing strategies to reduce youth obesity in European school-based interventions: a systematic review and meta-analysis. *Nutrition reviews* 2016;74(5):337-51. doi: 10.1093/nutrit/nuw004
526. Adom T, Villiers Ad, Puoane T, Kengne AP. School-based interventions targeting nutrition and physical activity, and body weight status of African children: a systematic review. *Nutrients* 2020;12(1):95. doi: 10.3390/nu12010095
527. Ajie WN, Chapman-Novakofski KM. Impact of computer-mediated, obesity-related nutrition education interventions for adolescents: A systematic review. *Journal of Adolescent Health* 2014;54(6):631-45. doi: 10.1016/j.jadohealth.2013.12.019
528. Al-Khudairy L, Loveman E, Colquitt JL, et al. Diet, physical activity and behavioural interventions for the treatment of overweight or obese adolescents aged 12 to 17 years. *Cochrane database of systematic reviews* 2017(6) doi: 10.1002/14651858.CD012691
529. Anselma M, Chinapaw MJM, van der Aa DA, Altenburg TM. Effectiveness and promising behavior change techniques of interventions targeting energy balance related behaviors in children from lower socioeconomic environments: A systematic review. *Plos One* 2020;15(9) doi: 10.1371/journal.pone.0237969
530. Bagherniya M, Taghipour A, Sharma M, et al. Obesity intervention programs among adolescents using social cognitive theory: a systematic literature review. *Health Education Research* 2018;33(1):26-39. doi: 10.1093/her/cyx079
531. Bautista-Castano I, Doreste J, Serra-Majem L. Effectiveness of interventions in the prevention of childhood obesity. *European Journal of Epidemiology* 2004;19(7):617-22.
532. Beilin L, Burke V, Milligan R. Strategies for prevention of adult hypertension and cardiovascular risk behaviour in childhood. An Australian perspective. *Journal of Human Hypertension* 1996;10:S51-S54.
533. Black AP, D'Onise K, McDermott R, Vally H, O'Dea K. How effective are family-based and institutional nutrition interventions in improving children's diet and health? A systematic review. *Bmc Public Health* 2017;17 doi: 10.1186/s12889-017-4795-5
534. Bleich SN, Segal J, Wu Y, Wilson R, Wang Y. Systematic review of community-based childhood obesity prevention studies. *Pediatrics* 2013;132(1):e201-10. doi: 10.1542/peds.2013-0886
535. Bleich SN, Vercammen KA, Zatz LY, et al. Interventions to prevent global childhood overweight and obesity: a systematic review. *The Lancet Diabetes & Endocrinology* 2018;6(4):332-46. doi: 10.1016/S2213-8587(17)30358-3
536. Boon CS, Clydesdale FM. A review of childhood and adolescent obesity interventions. *Critical Reviews in Food Science and Nutrition* 2005;45(7-8):511-25. doi: 10.1080/10408690590957160
537. Brandt S, Moss A, Berg S, Wabitsch M. School-based obesity prevention. *Bundesgesundheitsblatt-Gesundheitsforschung-Gesundheitsschutz* 2010;53(2-3):207-20. doi: 10.1007/s00103-009-1017-z
538. Brown EC, Buchan DS, Baker JS, et al. A systematised review of primary school whole class child obesity interventions: effectiveness, characteristics, and strategies. *BioMed research international* 2016 doi: 10.1155/2016/4902714

539. Brown T, Moore THM, Hooper L, et al. Interventions for preventing obesity in children. *Cochrane database of systematic reviews* 2019;7 doi: 10.1002/14651858.CD001871.pub4
540. Brown T, Smith S, Bhopal R, Kasim A, Summerbell C. Diet and Physical Activity Interventions to Prevent or Treat Obesity in South Asian Children and Adults: A Systematic Review and Meta-Analysis. *International Journal of Environmental Research and Public Health* 2015;12(1):566-94. doi: 10.3390/ijerph120100566
541. Brown T, Summerbell C. Systematic review of school-based interventions that focus on changing dietary intake and physical activity levels to prevent childhood obesity: an update to the obesity guidance produced by the National Institute for Health and Clinical Excellence. *Obesity Reviews* 2009;10(1):110-41. doi: 10.1111/j.1467-789X.2008.00515.x
542. Budd GM, Volpe SL. School-based obesity prevention: research, challenges, and recommendations. *Journal of School Health* 2006;76(10):485-95. doi: 10.1111/j.1746-1561.2006.00149.x
543. Cai L, Wu Y, Cheskin LJ, Wilson RF, Wang Y. Effect of childhood obesity prevention programmes on blood lipids: a systematic review and meta-analysis. *Obesity reviews* 2014;15(12):933-44. doi: 10.1111/obr.12227
544. Calvert S, Dempsey RC, Povey R. Delivering in-school interventions to improve dietary behaviours amongst 11-to 16-year-olds: A systematic review. *Obesity Reviews* 2019;20(4):543-53. doi: 10.1111/obr.12797
545. Carducci B, Oh C, Keats EC, Roth DE, Bhutta ZA. Effect of food environment interventions on anthropometric outcomes in school-aged children and adolescents in low- and middle-income countries: a systematic review and meta-analysis. *Current developments in nutrition* 2020;4(7) doi: 10.1093/cdn/nzaa098
546. Celia K, Kristin V, Angela E, et al. Behavioral interventions to prevent childhood obesity: a systematic review and metaanalyses of randomized trials. *The Journal of Clinical Endocrinology & Metabolism* 2008;93(12):4606-15. doi: 10.1210/jc.2006-2411
547. Champion KE, Newton NC, Spring B, et al. A systematic review of school-based eHealth interventions targeting alcohol use, smoking, physical inactivity, diet, sedentary behaviour and sleep among adolescents: a review protocol. *Systematic Reviews* 2017;6 doi: 10.1186/s13643-017-0645-x
548. Collins CE, Warren JM, Neve M, McCoy P, Stokes B. Systematic review of interventions in the management of overweight and obese children which include a dietary component. *International Journal of Evidence-Based Healthcare* 2007;5(1):2-53. doi: 10.1111/j.1479-6988.2007.00061.x
549. Connelly JB, Duaso MJ, Butler G. A systematic review of controlled trials of interventions to prevent childhood obesity and overweight: A realistic synthesis of the evidence. *Public health* 2007;121(7):510-17. doi: 10.1016/j.puhe.2006.11.015
550. Cook-Cottone C, Casey CM, Feeley TH, Baran J. A meta-analytic review of obesity prevention in the schools: 1997-2008. *Psychology in the Schools* 2009;46(8):695-719. doi: 10.1002/pits.20409
551. Dabravolskaj J, Montemurro G, Ekwaru JP, et al. Effectiveness of school-based health promotion interventions prioritized by stakeholders from health and education sectors: A systematic review and meta-analysis. *Preventive medicine reports* 2020;19 doi: 10.1016/j.pmedr.2020.101138

552. Davis JN, Spaniol MR, Somerset S. Sustainance and sustainability: maximizing the impact of school gardens on health outcomes. *Public health nutrition* 2015;18(13):2358-67. doi: 10.1017/S1368980015000221
553. De Bourdeaudhuij I, Van Cauwenberghe E, Spittaels H, et al. School-based interventions promoting both physical activity and healthy eating in Europe: a systematic review within the HOPE project. *Obesity Reviews* 2011;12(3):205-16. doi: 10.1111/j.1467-789X.2009.00711.x
554. de Medeiros ER, Reboucas DGD, Paiva ACD, et al. Studies evaluating of health interventions at schools: an integrative literature review. *Revista Latino-Americana De Enfermagem* 2018;26 doi: 10.1590/1518-8345.2463.3008
555. Delgado-Noguera M, Tort S, Martínez-Zapata MJ, Bonfill X. Primary school interventions to promote fruit and vegetable consumption: A systematic review and meta-analysis. *Preventive medicine* 2011;53(1-2):3-9. doi: 10.1016/j.ypmed.2011.04.016
556. Diep CS, Chen TA, Davies VF, Baranowski JC, Baranowski T. Influence of Behavioral Theory on Fruit and Vegetable Intervention Effectiveness Among Children: A Meta-Analysis. *Journal of Nutrition Education and Behavior* 2014;46(6):506-46. doi: 10.1016/j.jneb.2014.05.012
557. Doak CM, Visscher TLS, Renders CM, Seidell JC. The prevention of overweight and obesity in children and adolescents: a review of interventions and programmes. *Obesity Reviews* 2006;7(1):111-36. doi: 10.1111/j.1467-789X.2006.00234.x
558. Dominguez PR. Impact of school-based interventions on children's healthful nutritional outcomes (2009-2013): implications for future research. *International Journal of Child Health and Nutrition* 2015;4(3):180-93. doi: 10.6000/1929-4247.2015.04.03.7
559. Dudley DA, Cotton WG, Peralta LR. Teaching approaches and strategies that promote healthy eating in primary school children: a systematic review and meta-analysis. *International Journal of Behavioral Nutrition and Physical Activity* 2015;12(28):1-26. doi: 10.1186/s12966-015-0182-8
560. Evans CEL, Christian MS, Cleghorn CL, Greenwood DC, Cade JE. Systematic review and meta-analysis of school-based interventions to improve daily fruit and vegetable intake in children aged 5 to 12 y. *The American journal of clinical nutrition* 2012;96(4):889-901. doi: 10.3945/ajcn.111.030270
561. Feng L, Wei D, Lin S, et al. Systematic review and meta-analysis of school-based obesity interventions in mainland China. *PloS one* 2017;12(9) doi: 10.1371/journal.pone.0184704
562. Flodmark CE, Marcus C, Britton M. Interventions to prevent obesity in children and adolescents: a systematic literature review. *International journal of obesity* 2006;30(4):579-89. doi: 10.1038/sj.ijo.0803290
563. French SA. Public health strategies for dietary change: schools and workplaces. *The Journal of nutrition* 2005;135(4):910-12. doi: 10.1093/jn/135.4.910
564. Frerichs L, Brittin J, Sorensen D, et al. Influence of School Architecture and Design on Healthy Eating: A Review of the Evidence. *American Journal of Public Health* 2015;105(4):E46-E57. doi: 10.2105/ajph.2014.302453
565. Friedrich RR, Schuch I, Wagner MB. Effect of interventions on the body mass index of school-age students. *Revista De Saude Publica* 2012;46(3):551-60. doi: 10.1590/s0034-89102012005000036

566. Gittelsohn J, Trude ACB, Kim H. Pricing Strategies to Encourage Availability, Purchase, and Consumption of Healthy Foods and Beverages: A Systematic Review. *Preventing Chronic Disease* 2017;14 doi: 10.5888/pcd14.170213
567. Gorga E, Regazzoni V, Bansilal S, et al. School and family-based interventions for promoting a healthy lifestyle among children and adolescents in Italy: a systematic review. *Journal of Cardiovascular Medicine* 2016;17(8):547-55. doi: 10.2459/jcm.0000000000000404
568. Guerra PH, Nobre MRC, da Silveira JAC, Taddei JAAC. School-based physical activity and nutritional education interventions on body mass index: A meta-analysis of randomised community trials — Project PANE. *Preventive medicine* 2014;61:81-89. doi: 10.1016/j.ypmed.2014.01.005
569. Hamel LM, Robbins LB. Computer- and web-based interventions to promote healthy eating among children and adolescents: a systematic review. *Journal of Advanced Nursing* 2013;69(1):16-30. doi: 10.1111/j.1365-2648.2012.06086.x
570. Harris KC, Kuramoto LK, Schulzer M, Retallack JE. Effect of school-based physical activity interventions on body mass index in children: a meta-analysis. *Cmaj* 2009;180(7):719-26. doi: 10.1503/cmaj.080966
571. Harrison F, Jones AP. A framework for understanding school based physical environmental influences on childhood obesity. *Health & Place* 2012;18(3):639-48. doi: 10.1016/j.healthplace.2011.12.009
572. Haynos AF, O'Donohue WT. Universal childhood and adolescent obesity prevention programs: Review and critical analysis. *Clinical Psychology Review* 2012;32(5):383-99. doi: 10.1016/j.cpr.2011.09.006
573. Hoelscher DM, Kirk S, Ritchie L, Cunningham-Sabo L. Position of the Academy of Nutrition and Dietetics: Interventions for the Prevention and Treatment of Pediatric Overweight and Obesity. *Journal of the Academy of Nutrition and Dietetics* 2013;113(10):1375-94. doi: 10.1016/j.jand.2013.08.004
574. Hollands GJ, Carter P, Anwer S, et al. Altering the availability or proximity of food, alcohol, and tobacco products to change their selection and consumption. *Cochrane Database of Systematic Reviews* 2019(9) doi: 10.1002/14651858.CD012573.pub3
575. Hudson CE. An integrative review of obesity prevention in African American children. *Issues in Comprehensive Pediatric Nursing* 2008;31(4):147-70. doi: 10.1080/01460860802475168
576. Hung L, Tidwell DK, Hall ME, et al. A meta-analysis of school-based obesity prevention programs demonstrates limited efficacy of decreasing childhood obesity. *Nutrition Research* 2015;35(3):229-40. doi: 10.1016/j.nutres.2015.01.002
577. Inman DD, van Bakergem KM, LaRosa AC, Garr DR. Evidence-Based Health Promotion Programs for Schools and Communities. *American Journal of Preventive Medicine* 2011;40(2):207-19. doi: 10.1016/j.amepre.2010.10.031
578. Jaime PC, Lock K. Do school based food and nutrition policies improve diet and reduce obesity? *Preventive Medicine* 2009;48(1):45-53. doi: 10.1016/j.ypmed.2008.10.018
579. Kamath CC, Vickers KS, Ehrlich A, et al. Behavioral Interventions to Prevent Childhood Obesity: A Systematic Review and Metaanalyses of Randomized Trials. *Journal of Clinical Endocrinology & Metabolism* 2008;93(12):4606-15. doi: 10.1210/jc.2006-2411



580. Katz DL. School-based interventions for health promotion and weight control: not just waiting on the world to change. *Annual review of public health* 2009;30(1):253-72. doi: 10.1146/annurev.publhealth.031308.100307
581. Katz DL, O'Connell M, Njike VY, Yeh MC, Nawaz H. Strategies for the prevention and control of obesity in the school setting: systematic review and meta-analysis. *International journal of obesity* 2008;32(12):1780-89. doi: 10.1038/ijo.2008.158
582. Kelly NR, Mazzeo SE, Bean MK. Systematic review of dietary interventions with college students: Directions for future research and practice. *Journal of nutrition education and behavior* 2013;45(4):304-13. doi: 10.1016/j.jneb.2012.10.012
583. Kelly SA, Melnyk BM. Systematic review of multicomponent interventions with overweight middle adolescents: Implications for clinical practice and research. *Worldviews on Evidence-Based Nursing* 2008;5(3):113-35. doi: 10.1111/j.1741-6787.2008.00131.x
584. Kerr JA, Loughman A, Knox A, et al. Nutrition-related interventions targeting childhood overweight and obesity: a narrative review. *Obesity Reviews* 2019;20:45-60. doi: 10.1111/obr.12768
585. Kesten JM, Griffiths PL, Cameron N. A systematic review to determine the effectiveness of interventions designed to prevent overweight and obesity in pre-adolescent girls. *Obesity Reviews* 2011;12(12):997-1021. doi: 10.1111/j.1467-789X.2011.00919.x
586. Khambalia AZ, Dickinson S, Hardy LL, Gill T, Baur LA. A synthesis of existing systematic reviews and meta-analyses of school-based behavioural interventions for controlling and preventing obesity. *Obesity Reviews* 2012;13(3):214-33. doi: 10.1111/j.1467-789X.2011.00947.x
587. Knai C, Pomerleau J, Lock K, McKee M. Getting children to eat more fruit and vegetables: A systematic review. *Preventive Medicine* 2006;42(2):85-95. doi: 10.1016/j.ypmed.2005.11.012
588. Kobes A, Kretschmer T, Timmerman G, Schreuder P. Interventions aimed at preventing and reducing overweight/obesity among children and adolescents: a meta-synthesis. *Obesity reviews* 2018;19(8) doi: 1065-1079
589. Kong K, Liu J, Tao Y. Limitations of studies on school-based nutrition education interventions for obesity in China: a systematic review and meta-analysis. *Asia Pacific journal of clinical nutrition* 2016;25(3):589-601.
590. Krishnaswami J, Martinson M, Wakimoto P, Anglemeyer A. Community-Engaged Interventions on Diet, Activity, and Weight Outcomes in U.S. Schools A Systematic Review. *American Journal of Preventive Medicine* 2012;43(1):81-91. doi: 10.1016/j.amepre.2012.02.031
591. Kristjansson EA, Robinson V, Petticrew M, et al. School feeding for improving the physical and psychosocial health of disadvantaged elementary school children. *Cochrane Database of Systematic Reviews* 2007(1) doi: 10.1002/14651858.CD004676.pub2
592. Kropski JA, Keckley PH, Jensen GL. School-based obesity prevention programs: An evidence-based review. *Obesity* 2008;16(5):1009-18. doi: 10.1038/oby.2008.29
593. Kyere P, Veerman JL, Lee P, Stewart DE. Effectiveness of school-based nutrition interventions in sub-Saharan Africa: a systematic review. *Public Health Nutrition* 2020;23(14):2626-36. doi: 10.1017/s1368980020000506

594. Langford R, Bonell C, Jones H, Campbell R. Obesity prevention and the Health Promoting Schools framework: essential components and barriers to success. *Journal of Behavioral Nutrition and Physical Activity* 2015;12(15):1-17. doi: 10.1186/s12966-015-0167-7
595. Langford R, Bonell C, Jones H, et al. The World Health Organization's Health Promoting Schools framework: a Cochrane systematic review and meta-analysis. *Bmc Public Health* 2015;15 doi: 10.1186/s12889-015-1360-y
596. Langford R, Bonell CP, Jones HE, et al. The WHO Health Promoting School framework for improving the health and well-being of students and their academic achievement. *Cochrane database of systematic reviews* 2014;2014(4) doi: 10.1002/14651858.CD008958.pub2
597. Lavelle HV, Mackay DF, Pell JP. Systematic review and meta-analysis of school-based interventions to reduce body mass index. *Journal of Public Health* 2012;34(3):360-69. doi: 10.1093/pubmed/fdr116
598. Leme ACB, Haines J, Tang LS, et al. Impact of Strategies for Preventing Obesity and Risk Factors for Eating Disorders among Adolescents: A Systematic Review. *Nutrients* 2020;12(10) doi: 10.3390/nu12103134
599. Licence K. Promoting and protecting the health of children and young people. *Child Care Health and Development* 2004;30(6):623-35. doi: 10.1111/j.1365-2214.2004.00473.x
600. Lima-Serrano M, Lima-Rodriguez JS. Impact of school-based health promotion interventions aimed at different behavioral domains: a systematic review. *Gaceta Sanitaria* 2014;28(5):411-17. doi: 10.1016/j.gaceta.2014.05.003
601. Lippevelde Wv, Verloigne M, Bourdeaudhuij Id, et al. Does parental involvement make a difference in school-based nutrition and physical activity interventions? A systematic review of randomized controlled trials. *International journal of public health* 2012;57(4):673-78. doi: 10.1007/s00038-012-0335-3
602. Lissau I. Prevention of overweight in the school arena. *Acta Paediatrica* 2007;96:12-18. doi: 10.1111/j.1651-2227.2007.00164.x
603. Liu Z, Xu H, Wen L, et al. A systematic review and meta-analysis of the overall effects of school-based obesity prevention interventions and effect differences by intervention components. *International Journal of Behavioral Nutrition and Physical Activity* 2019;16(95):1-12. doi: 10.1186/s12966-019-0848-8
604. Lopez L, Audisio Y, Berra S. Effectiveness of population-based interventions on the prevention of overweight in children and adolescents. *Medicina Clinica* 2010;135(10):462-69. doi: 10.1016/j.medcli.2009.06.010
605. Luckner H, Moss JR, Gericke CA. Effectiveness of interventions to promote healthy weight in general populations of children and adults: a meta-analysis. *The European Journal of Public Health* 2012;22(4):491-97. doi: 10.1093/eurpub/ckr141
606. Mahmood S, Perveen T, Dino A, Ibrahim F, Jaishri M. Effectiveness of school-based intervention programs in reducing prevalence of overweight. *Indian journal of community medicine: official publication of Indian Association of Preventive & Social Medicine* 2014;39(2):87. doi: 10.4103/0970-0218.132724
607. Martin A, Booth JN, Laird Y, et al. Physical activity, diet and other behavioural interventions for improving cognition and school achievement in children and adolescents with obesity or

- overweight. *Cochrane Database of Systematic Reviews* 2018(3) doi: 10.1002/14651858.CD009728.pub3
608. Martin A, Saunders DH, Shenkin SD, Sproule J. Lifestyle intervention for improving school achievement in overweight or obese children and adolescents. *Cochrane Database of Systematic Reviews* 2014(3) doi: 10.1002/14651858.CD009728.pub2
609. McHugh C, Hurst A, Bethel A, et al. The impact of the World Health Organization Health Promoting Schools framework approach on diet and physical activity behaviours of adolescents in secondary schools: a systematic review. *Public Health* 2020;182:116-24. doi: 10.1016/j.puhe.2020.02.006
610. Mead E, Brown T, Rees K, et al. Diet, physical activity and behavioural interventions for the treatment of overweight or obese children from the age of 6 to 11 years. *Cochrane Database of Systematic Reviews* 2017(6) doi: 10.1002/14651858.Cd012651
611. Meiklejohn S, Ryan L, Palermo C. A systematic review of the impact of multi-strategy nutrition education programs on health and nutrition of adolescents. *Journal of nutrition education and behavior* 2016;48(9): 631-46. doi: 10.1016/j.jneb.2016.07.015
612. Micha R, Karageorgou D, Bakogianni I, et al. Effectiveness of school food environment policies on children's dietary behaviors: a systematic review and meta-analysis. *PLoS one* 2018;13(3) doi: 10.1371/journal.pone.0194555
613. Moore SG, Donnelly JK, Jones S, Cade JE. Effect of Educational Interventions on Understanding and Use of Nutrition Labels: A Systematic Review. *Nutrients* 2018;10(10) doi: 10.3390/nu10101432
614. Mukamana O, Johri M. What is known about school-based interventions for health promotion and their impact in developing countries? A scoping review of the literature. *Health Education Research* 2016;31(5):587-602. doi: 10.1093/her/cyw040
615. Muzaffar H, Metcalfe JJ, Fiese B. Narrative review of culinary interventions with children in schools to promote healthy eating: directions for future research and practice. *Current developments in nutrition* 2018;2(6) doi: 10.1093/cdn/nzy016
616. Nakabayashi J, Melo GRI, Toral N. Transtheoretical model-based nutritional interventions in adolescents: a systematic review. *Bmc Public Health* 2020;20(1) doi: 10.1186/s12889-020-09643-z
617. Nathan N, Janssen L, Sutherland R, et al. The effectiveness of lunchbox interventions on improving the foods and beverages packed and consumed by children at centre-based care or school: a systematic review and meta-analysis. *International Journal of Behavioral Nutrition and Physical Activity* 2019;16 doi: 10.1186/s12966-019-0798-1
618. Navarrete JAM, Villamil SSG, Bautista JEC, et al. Effectiveness of educational interventions conducted in latin america for the prevention of overweight and obesity in scholar children from 6-17 years old; a systematic review. *Nutricion Hospitalaria* 2015;31(1):102-14. doi: 10.3305/nh.2015.31.1.8146
619. Nicholson LM, McLeod Loren D, Reifenberg A, Beets MW, Bohnert AM. School as a Protective Setting for Excess Weight Gain and Child Obesity: A Meta-Analysis. *J Sch Health* 2021;91(1):19-28. doi: 10.1111/josh.12972

620. Oldroyd J, Burns C, Lucas P, Haikerwal A, Waters E. The effectiveness of nutrition interventions on dietary outcomes by relative social disadvantage: a systematic review. *Journal of Epidemiology & Community Health* 2008;62(7):573-79. doi: 10.1136/jech.2007.066357
621. Oosterhoff M, Joore M, Ferreira I. The effects of school-based lifestyle interventions on body mass index and blood pressure: a multivariate multilevel meta-analysis of randomized controlled trials. *Obesity reviews* 2016;17(11):1131-53.
622. Perez-Morales ME, Bacardi-Gascon M, Jimenez-Cruz A, Armendariz-Anguiano A. Randomized controlled school based interventions to prevent childhood obesity: systematic review from 2006 to 2009. *Archivos latinoamericanos de nutricion* 2009;59(3):253-59.
623. Philipsborn Pv, Stratil JM, Burns J, et al. Environmental interventions to reduce the consumption of sugar-sweetened beverages and their effects on health. *Cochrane Database of Systematic Reviews* 2019(6) doi: 10.1002/14651858.CD012292.pub2
624. Prescott MP, Cleary R, Bonanno A, et al. Farm to School Activities and Student Outcomes: A Systematic Review. *Advances in Nutrition* 2020;11(2):357-74. doi: 10.1093/advances/nmz094
625. Rahman AA, Jomaa L, Kahale LA, Adair P, Pine C. Effectiveness of behavioral interventions to reduce the intake of sugar-sweetened beverages in children and adolescents: a systematic review and meta-analysis. *Nutrition reviews* 2018;76(2):88-107. doi: 10.1093/nutrit/nux061
626. Rochira A, Tedesco D, Ubiali A, Fantini MP, Gori D. School Gardening Activities Aimed at Obesity Prevention Improve Body Mass Index and Waist Circumference Parameters in School-Aged Children: A Systematic Review and Meta-Analysis. *Childhood Obesity* 2020;16(3):154-73. doi: 10.1089/chi.2019.0253
627. Saguil A, Stephens M. Interventions to Prevent Childhood Obesity. *American Family Physician* 2012;86(1):30-32.
628. Salam RA, Padhani ZA, Das JK, et al. Effects of Lifestyle Modification Interventions to Prevent and Manage Child and Adolescent Obesity: A Systematic Review and Meta-Analysis. *Nutrients* 2020;12(8) doi: 10.3390/nu12082208
629. Saraf DS, Nongkynrih B, Pandav CS, et al. A Systematic Review of School-Based Interventions to Prevent Risk Factors Associated With Noncommunicable Diseases. *Asia-Pacific Journal of Public Health* 2012;24(5):733-52. doi: 10.1177/1010539512445053
630. Savoie-Roskos MR, Wengreen H, Durward C. Increasing Fruit and Vegetable Intake among Children and Youth through Gardening-Based Interventions: A Systematic Review. *Journal of the Academy of Nutrition and Dietetics* 2017;117(2):240-50. doi: 10.1016/j.jand.2016.10.014
631. Sbruzzi G, Eibel B, Barbiero SM, et al. Educational interventions in childhood obesity: A systematic review with meta-analysis of randomized clinical trials. *Preventive medicine* 2013;56(5):254-64. doi: 10.1016/j.ypmed.2013.02.024
632. Sharma M. School-based interventions for childhood and adolescent obesity. *Obesity reviews* 2006;7(3):261-69. doi: 10.1111/j.1467-789X.2006.00227.x
633. Sharma M. Dietary Education in School-Based Childhood Obesity Prevention Programs. *Advances in Nutrition* 2011;2(2):207S-16S. doi: 10.3945/an.111.000315
634. Sherry B. Food behaviors and other strategies to prevent and treat pediatric overweight. *International Journal of Obesity* 2005;29(2):116-26. doi: 10.1038/sj.ijo.0803078

635. Silveira JAC, Taddei JAAC, Guerra PH, Nobre MRC. Effectiveness of school-based nutrition education interventions to prevent and reduce excessive weight gain in children and adolescents: a systematic review. *Jornal de pediatria* 2011;87(5):382-92. doi: 10.2223/JPED.2123
636. Silveira JACd, Taddei JAdAC, Guerra PH, Nobre MRC. The effect of participation in school-based nutrition education interventions on body mass index: A meta-analysis of randomized controlled community trials. *Preventive medicine* 2013;56(3):237-43. doi: 10.1016/j.ypmed.2013.01.011
637. Singhal J, Herd C, Adab P, Pallan M. Effectiveness of school-based interventions to prevent obesity among children aged 4 to 12 years old in middle-income countries: A systematic review and meta-analysis. *Obes Rev* 2021;22(1):e13105. doi: 10.1111/obr.13105
638. Sobol-Goldberg S, Rabinowitz J, Gross R. School-based obesity prevention programs: a meta-analysis of randomized controlled trials. *Obesity* 2013;21(12):2422-28. doi: 10.1002/oby.20515
639. St George SM, Agosto Y, Rojas LM, et al. A developmental cascade perspective of paediatric obesity: A systematic review of preventive interventions from infancy through late adolescence. *Obesity Reviews* 2020;21(2) doi: 10.1111/obr.12939
640. Stice E, Shaw H, Marti CN. A meta-analytic review of obesity prevention programs for children and adolescents: The skinny on interventions that work. *Psychological Bulletin* 2006;132(5):667-91. doi: 10.1037/0033-2909.132.5.667
641. Strieter L, Laddu DR, Sainsbury J, Arena R. The Importance of School-based Healthy Living Initiatives: Introducing the Health and Wellness Academy Concept. *Progress in Cardiovascular Diseases* 2019;62(1):68-73. doi: 10.1016/j.pcad.2018.08.005
642. Uijtdewilligen L, Waters CN, Muller-Riemenschneider F, Lim YW. Preventing childhood obesity in Asia: an overview of intervention programmes. *Obesity Reviews* 2016;17(11):1103-15. doi: 10.1111/obr.12435
643. Van Cauwenberghe E, Maes L, Spittaels H, et al. Effectiveness of school-based interventions in Europe to promote healthy nutrition in children and adolescents: systematic review of published and 'grey' literature. *British Journal of Nutrition* 2010;103(6):781-97. doi: 10.1017/s0007114509993370
644. van Stralen MM, Yildirim M, Velde SJT, et al. What works in school-based energy balance behaviour interventions and what does not? A systematic review of mediating mechanisms. *International Journal of Obesity* 2011;35(10):1251-65. doi: 10.1038/ijo.2011.68
645. Vargas-Garcia EJ, Evans CEL, Prestwich A, et al. Interventions to reduce consumption of sugar-sweetened beverages or increase water intake: evidence from a systematic review and meta-analysis. *Obesity Reviews* 2017;18(11):1350-63. doi: 10.1111/obr.12580
646. Vasques C, Magalhaes P, Cortinhas A, et al. Effects of Intervention Programs on Child and Adolescent BMI: A Meta-Analysis Study. *Journal of Physical Activity & Health* 2014;11(2):426-44. doi: 10.1123/jpah.2012-0035
647. Verjans-Janssen SRB, van de Kolk I, Van Kann DHH, Kremers SPJ, Gerards SMPL. Effectiveness of school-based physical activity and nutrition interventions with direct parental involvement on children's BMI and energy balance-related behaviors: - A systematic review. *PLoS one* 2018;13(9) doi: 10.1371/journal.pone.0204560

648. Verrotti A, Penta L, Zenzeri L, Agostinelli S, De Feo P. Childhood obesity: prevention and strategies of intervention. A systematic review of school-based interventions in primary schools. *Journal of Endocrinological Investigation* 2014;37(12):1155-64. doi: 10.1007/s40618-014-0153-y
649. Verstraeten R, Roberfroid D, Lachat C, et al. Effectiveness of preventive school-based obesity interventions in low- and middle-income countries: a systematic review. *The American journal of clinical nutrition* 2012;96(2):415-38. doi: 10.3945/ajcn.112.035378
650. Wang X, Zhou G, Zeng J, et al. Effect of educational interventions on health in childhood: a meta-analysis of randomized controlled trials. *Public Health* 2018;164:134-47. doi: 10.1016/j.puhe.2018.04.013
651. Wang Y, Cai L, Wu Y, et al. What childhood obesity prevention programmes work? A systematic review and meta-analysis. *Obesity reviews* 2015;16(7):547-65. doi: 10.1111/obr.12277
652. Wilfley DE, Tibbs TL, Buren DJV, et al. Lifestyle Interventions in the Treatment of Childhood Overweight: A Meta-Analytic Review of Randomized Controlled Trials. *Health psychology* 2007;26(5):521. doi: 10.1037/0278-6133.26.5.521
653. Williams AJ, Henley WE, Williams CA, et al. Systematic review and meta-analysis of the association between childhood overweight and obesity and primary school diet and physical activity policies. *International Journal of Behavioral nutrition and Physical activity* 2013;10(101):1-22. doi: 10.1186/1479-5868-10-101
654. Wolfenden L, Barnes C, Jones J, et al. Strategies to improve the implementation of healthy eating, physical activity and obesity prevention policies, practices or programmes within childcare services. *Cochrane Database of Systematic Reviews* 2020(2) doi: 10.1002/14651858.CD011779.pub3
655. Wolfenden L, Nathan NK, Sutherland R, et al. Strategies for enhancing the implementation of school-based policies or practices targeting risk factors for chronic disease. *Cochrane Database Syst Rev* 2017;11(11):CD011677. doi: 10.1002/14651858.CD011677.pub2
656. Yildirim M, Van Stralen MM, Chinapaw MJM, et al. For whom and under what circumstances do school-based energy balance behavior interventions work? Systematic review on moderators. *International Journal of Pediatric Obesity* 2011;6(2-2):E46-E57. doi: 10.3109/17477166.2011.566440
657. Young I, Waddell L, Harding S, et al. A systematic review and meta-analysis of the effectiveness of food safety education interventions for consumers in developed countries. *Bmc Public Health* 2015;15 doi: 10.1186/s12889-015-2171-x
658. Zenzen W, Kridli S. Integrative Review of School-based Childhood Obesity Prevention Programs. *Journal of Pediatric Health Care* 2009;23(4):242-58. doi: 10.1016/j.pedhc.2008.04.008
659. James J, Thomas P, Cavan D. School anti-"fizzy drinks" programme helps to prevent obesity in children. *Evidence-Based Healthcare & Public Health* 2004;8(6) doi: 10.1016/j.ehbc.2004.09.004
660. Li B, Liu WJ, Cheng KK, et al. Development of the theory-based Chinese primary school children physical activity and dietary behaviour changes intervention (CHIRPY DRAGON): development of a cluster-randomised controlled trial. *The Lancet* 2016;388:51. doi: 10.1016/S0140-6736(16)31978-X

661. Aceves-Martins M, Llauro E, Tarro L, et al. Retracted: A School-Based, Peer-Led, Social Marketing Intervention To Engage Spanish Adolescents in a Healthy Lifestyle (“We Are Cool”—Som la Pera Study): A Parallel-Cluster Randomized Controlled Study. *Childhood Obesity* 2017;13(4):300-13. doi: 10.1089/chi.2016.0216
662. Adab. Effectiveness of a childhood obesity prevention programme delivered through schools, targeting 6 and 7 year olds: cluster randomised controlled trial (WAVES study) (vol 360, k211, 2018). *Bmj-British Medical Journal* 2018;361 doi: 10.1136/bmj.k1954
663. Adab P, Pallan M, Lancashire E. THE WEST MIDLANDS ACTIVE LIFESTYLE AND HEALTHY EATING IN SCHOOL CHILDREN (WAVES) STUDY: OBJECTIVES; METHODS; INTERVENTION AND BASELINE CHARACTERISTICS OF THE STUDY POPULATION. ON BEHALF OF THE WAVES STUDY INVESTIGATORS. *International Journal of Behavioral Medicine* 2012;19:S226-S26.
664. Amini M, Djazayeri A, Majdzadeh R, et al. A school-based intervention to reduce excess weight in overweight and obese primary school children. *Annals of Nutrition and Metabolism* 2015;67:409-09.
665. Ashfield-Watt PAL, Stewart EA. Evaluation of free fruit provision to low decile Auckland primary school children. *Proceedings of the Nutrition Society of New Zealand* 2005;30:131-31.
666. Atkinson RL, Nitzke SA. Randomized controlled trial of primary-school based intervention to reduce risk factors for obesity. *J Pediatr* 2002;140(5):633-4.
667. Batalau R, Cruz J, Cabrita P, et al. Project PANK: preliminary results of a multidisciplinary school-based intervention in children with cardiovascular and metabolic risk factors. A randomized controlled trial. *European Journal of Clinical Nutrition* 2015;69:S25-S25.
668. Bohme P, Legrand K, Omorou AY, et al. A proportionate intervention in school led to improve overweight prevention without aggravating the health social inequalities. *Obesity facts* 2016;9 (Suppl. 1):34-34. doi: 10.1159/000446744
669. Borradaile KE. Stick a fork in it: A psychometric evaluation of a Food Frequency Questionnaire and an Activity Frequency Questionnaire. 2007. Available from: <https://repository.upenn.edu/dissertations/AAI3260882>.
670. Briganti S, Zelaschi R, Ermetici F, et al. The Italian E.A.T. Project: effectiveness of a multicomponent school-based health promotion study on measures of fatness and behavior in teenagers. *Eat Weight Disord* 2014;19(3):444-45. doi: 10.1007/s40519-014-0134-3
671. Burgermaster M. Food, Health & Choices Implementation and Context: The Case for a Comprehensive Approach to Process Evaluation in School-Based Childhood Obesity Prevention Trials. 2016. Available from: <https://www.proquest.com/dissertations-theses/i-food-health-amp-choices-implementation-context/docview/1685959270/se-2?accountid=10979>.
672. Burke V, Thompson C, Taggart AC, et al. Differences in response to nutrition and fitness education programmes in relation to baseline levels of cardiovascular risk in 10 to 12-year-old children. *J Hum Hypertens* 1996;10 Suppl 3:S99-106.
673. Caballero B. Prevention of obesity in American Indian schoolchildren: the pathways study - Introduction. *American Journal of Clinical Nutrition* 1999;69(4 SUPPL.):745S-46S.

674. Campbell R, Rawlins E, Wells S, et al. Intervention fidelity in a school-based diet and physical activity intervention in the UK: Active for Life Year 5. *Int J Behav Nutr Phys Act* 2015;12(-141):141. doi: 10.1186/s12966-015-0300-7
675. Chagas C, Pontes ESTB, Reffatti LM, Botelho RBA, Toral N. Rango Cards, a digital game designed to promote a healthy diet: a randomized study protocol. *BMC Public Health* 2018;18(1):910. doi: 10.1186/s12889-018-5848-0
676. Cuttini M, Barreto ML. Prevention of childhood obesity: issues on the evaluation of interventions. *J Epidemiol Community Health* 2010;64(11):939. doi: 10.1136/jech.2009.098491
677. Dai C-L. Evaluation of an afterschool obesity prevention program: Children's healthy eating and exercise program. 2015. Available from: <https://www.proquest.com/books/evaluation-afterschool-obesity-prevention-program/docview/1701501466/se-2?accountid=10979>.
678. Drews KL, Harrell JS, Thompson D, et al. Recruitment and retention strategies and methods in the HEALTHY study. *Int J Obes (Lond)* 2009;33 Suppl 4:S21-8. doi: 10.1038/ijo.2009.113
679. Dunker KLL, Claudino AM. Validity and Reliability of the Brazilian Version of the Weight Control Behaviors Scale. *J Pediatr* 2017;189:143-48 e1. doi: 10.1016/j.jpeds.2017.06.037
680. Durant N, Baskin ML, Thomas O, Allison DB. School-based obesity treatment and prevention programs: all in all, just another brick in the wall? *International Journal of Obesity* 2008;32(12):1747-51. doi: 10.1038/ijo.2008.165
681. Dzewaltowski DA, Geller KS, Rosenkranz RR, et al. HOP'N After-School Project: Intervention Description and Process Evaluation of An Obesity Prevention Randomized Controlled Trial. *Medicine and Science in Sports and Exercise* 2011;43(5):23-23. doi: 10.1249/01.Mss.0000402739.35192.56
682. Elinder LS. School-based intervention in low income communities. *Obesity facts* 2018;11(suppl 1):22-22. doi: 10.1159/000489691
683. Foster G, Sherman S, McLaughlin J, et al. A randomized trial of school-based obesity prevention program. *Obesity Research* 2004;12:A8-A8.
684. Gamio MO. The influence of point-of-purchase cafeteria-based nutrition education program on high school students. 1996. Available from: [https://trace.tennessee.edu/utk\\_graddiss/3765](https://trace.tennessee.edu/utk_graddiss/3765). 1996
685. Gatto NM, Martinez LC, Spruijt-Metz D, Davis JN. LA sprouts randomized controlled nutrition and gardening program reduces obesity and metabolic risk in Latino youth. *Obesity (Silver Spring)* 2015;23(6):1244-51. doi: 10.1002/oby.21077
686. Grazioplene MM, Koch PA, Wang YC, Lee Gray H, Contento IR. Cost-effectiveness of a Nutrition Education Curriculum Intervention in Elementary Schools. *J Nutr Educ Behav* 2017;49(8):684-91 e1. doi: 10.1016/j.jneb.2016.10.006
687. Habib-Mourad C, Ghandour L, Moore H, Hwalla N, Summerbell C. An intervention to promote Healthy Eating and Physical Activity in Lebanese School children: health-E-PALS, a pilot cluster randomised controlled trial. *Obesity Facts* 2014;7(suppl 1):158-59. doi: 10.1159/000363668
688. Johnston CA, Moreno J, El-Mubasher A, Papaioannou MA, Woehler D. Inclusion of peers in a school-based obesity intervention. *Faseb Journal* 2013;27



689. Jones BA. Incentivizing children's fruit and vegetable consumption: Evaluation and modification of the food dudes program for sustainable use in u.s. elementary schools. 2016. Available from: <https://www.proquest.com/dissertations-theses/incentivizing-childrens-fruit-vegetable/docview/1767330984/se-2?accountid=10979>.
690. Jørgensen TS, Krølner R, Ersbøll AK, et al. Evaluation of a curricular component in a school-based intervention to increase fruit and vegetable consumption among Danish adolescents: the Boost study. *European journal of epidemiology* 2012;27(1):S38-S38. doi: 10.1007/s10654-012-9722-6
691. Kain J, Uauy R, Concha F, et al. School-based obesity prevention interventions for Chilean children during the past decades: lessons learned. *Adv Nutr* 2012;3(4):616S-21S. doi: 10.3945/an.112.001966
692. Kanan MS. Childhood obesity prevention intervention and policy in the Mexican school system. 2018. Available from: <https://www.proquest.com/books/childhood-obesity-prevention-intervention-policy/docview/1897381941/se-2?accountid=10979>.
693. Kesztyus D, Traub M, Lauer R, Kesztyus T, Steinacker JM. Skipping breakfast is detrimental for primary school children: cross-sectional analysis of determinants for targeted prevention. *Bmc Public Health* 2017;17 doi: 10.1186/s12889-017-4169-z
694. Khatun M, Sonia NN, Mou MK, et al. Impact of Nutrition Education on Overweight Adolescent Girls (10-19years) in the Selected Schools of Dhaka City. *Annals of Nutrition and Metabolism* 2017;71:1254-54.
695. Kovalskys I, Rougier PI, Luciana L, Herscovici CR, De Gregorio MJ. Mini Salten: A Case Study on Learnings from Argentina on Outcomes and Challenges. *Annals of Nutrition and Metabolism* 2017;71:96-97.
696. Lubans D, Dewar D, Morgan P, et al. Two-year outcomes from the NEAT Girls obesity prevention cluster randomized controlled trial. *Journal of Science and Medicine in Sport* 2013;16:e34. doi: 10.1016/j.jsams.2013.10.081
697. Lubans D, Morgan P, Aguiar E, Callister R. Randomised controlled trial of the Physical Activity Leaders (PALs) program for low-active adolescent boys from disadvantaged secondary schools. *Journal of Science and Medicine in Sport* 2010;13:e12. doi: 10.1016/j.jsams.2010.10.486
698. Lubans D, Morgan P, Okely A, et al. Preventing obesity among adolescent girls in lowincome secondary schools: one-year outcomes of the NEAT Girls cluster randomized controlled trial. *Obesity Research & Clinical Practice* 2012;6 doi: 10.1016/j.orcp.2012.08.080
699. Lubans D, Morgan P, Okely A, et al. Preventing obesity among adolescent girls: outcomes of the nutrition and enjoyable activity for teen girls cluster randomized controlled trial. *Obesity Research & Clinical Practice* 2012;15 doi: 10.1016/j.orcp.2012.08.080
700. Lubans DR, Dewar DL, Plotnikoff RC, et al. Two year outcomes and moderators of intervention effects from the NEAT Girls obesity prevention group randomised controlled trial. *Obesity Research & Clinical Practice* 2013;7:e36-e37. doi: 10.1016/j.orcp.2013.12.572
701. Maha Nubani Huseini M, Donchin M. School-based intervention program to promote healthy eating & physical activity among palestinian mothers. *European Journal of Preventive Cardiology* 2016;23(1\_suppl):S59-S64. doi: 10.1177/2047487316668128

702. Malek M, Norman A, Elinder LS, Patterson E, Nyberg G. A healthy school start plus for prevention of childhood overweight and obesity in disadvantaged areas through parental support in the school setting: A parallel group cluster randomised trial. *Journal of Physical Activity & Health* 2018;15(10):S202-S02.
703. Marcus C, Nordenfelt A, Nyberg G, Karpmyr M, Kowalski J. STOPP; Stockholm Obesity Prevention Programme: effect of a 4 year school-based randomised prevention study on overweight prevalence among children 6-10 years of age. *International Journal of Obesity* 2007;31:S37-S37.
704. McKay HA, Macdonald HM, Nettlefold L, et al. Action Schools! BC implementation: from efficacy to effectiveness to scale-up. *Br J Sports Med* 2015;49(4):210-8. doi: 10.1136/bjsports-2013-093361
705. Mejia MA, Coria-Navia A, Uriegas-Mejia G, et al. The Victoria Trial: A School-Based Health Education Program to Reduce the Risk of Obesity Among a High-Risk Population. *Faseb Journal* 2017;31(- 1)
706. Monika Siegrist M, Hanssen H, Lammel C, et al. Changes in fitness, body weight and inflammatory markers in children: longitudinal results of a comprehensive school-based intervention study (JuvenTUM 3). *European journal of preventive cardiology* 2013;20(1 SUPPL. 1):S109. doi: 10.1177/2047487314530052
707. Moore L, Moore GF, Tapper K, et al. Free breakfasts in schools: design and conduct of a cluster randomised controlled trial of the Primary School Free Breakfast Initiative in Wales [ISRCTN18336527]. *BMC Public Health* 2007;7:258. doi: 10.1186/1471-2458-7-258
708. Nichols S, Francis M. Long-term impact of a school-based intervention on knowledge, dietary intakes and physical activity among primary school children. *American journal of epidemiology* 2009;169(11 Suppl 1):s121-s21.
709. Nicklas TA, Dwyer J, Feldman HA, et al. Serum cholesterol levels in children are associated with dietary fat and fatty acid intake. *J Am Diet Assoc* 2002;102(4):511-7. doi: 10.1016/s0002-8223(02)90117-3
710. O'Neil CE, Nicklas TA. Gimme 5: an innovative, school-based nutrition intervention for high school students. *J Am Diet Assoc* 2002;102(3 Suppl):S93-6. doi: 10.1016/s0002-8223(02)90432-3
711. Ochoa A, Aviles AO, Tenesaca DSA, et al. Effect of the School-Based Health Promotion Intervention Activital on Dietary Intake and Waist Circumference: A Cluster Randomized Controlled Trial. *Annals of Nutrition and Metabolism* 2017;71:1272-73.
712. Ochoa A, Aviles AO, Verstraeten R, et al. PROCESS EVALUATION OF THE CLUSTER RANDOMIZED CONTROLLED TRIAL ACTIVITAL- A SCHOOL-BASED HEALTH PROMOTION INTERVENTION. *Annals of Nutrition and Metabolism* 2017;71:403-03.
713. Palcic JL, Johnston CA, El-Mubasher AA, Woehler DL, Foreyt JP. Effects of a school-based pediatric obesity prevention program. *Faseb Journal* 2010;24
714. Pena S, Carranza M, Cuadrado C, et al. Effectiveness of a gamification strategy to prevent childhood obesity in schools: a cluster-randomized controlled trial. *Proceedings of the Nutrition Society* 2020;79(OCE2):E145-E45. doi: 10.1017/s0029665120000932

715. Perez Rodrigo C, Aranceta J, Brug H, et al. [School-based education strategies to promote fruit and vegetable consumption: the Pro Children Project]. *Arch Latinoam Nutr* 2004;54(2 Suppl 1):14-9.
716. Perez-Morales ME, Bacardi-Gascon M, Jiménez-Cruz A. Long-term randomized school-based intervention: effect on obesity and lifestyles in Mexico. *Obesity reviews* 2011;12:74-74. doi: 10.1111/j.1467-789X.2011.00889.x
717. Pratt CA, Boyington J, Esposito L, et al. Childhood Obesity Prevention and Treatment Research (COPTR): interventions addressing multiple influences in childhood and adolescent obesity. *Contemp Clin Trials* 2013;36(2):406-13. doi: 10.1016/j.cct.2013.08.010
718. Recasens MA, Xicola-Coromina E, Manresa JM, et al. Impact of school-based nutrition and physical activity intervention on body mass index eight years after cessation of randomized controlled trial (AVall study). *Clin Nutr* 2019;38(6):2592-98. doi: 10.1016/j.clnu.2018.12.029
719. Rush E, Reed PW, Simmons D, et al. Baseline measures for a school-based obesity control programme: Project Energize: differences by ethnicity, rurality, age and school socio-economic status. *J Paediatr Child Health* 2013;49(4):E324-31. doi: 10.1111/jpc.12015
720. Scherr R, Linnell J, Smith M, et al. The Shaping Healthy Choices Program results in improved nutrition and health-related outcomes. *The FASEB Journal* 2014;28:273. doi: 10.1096/fasebj.28.1\_supplement.273.6
721. Siti Sabariah Buhari S, Ruzita Abdul Talib R, Poh Bee Koon P. The HEBAT! Program: an obesity prevention exploratory cluster randomized controlled trial. *Obesity reviews* 2014;15 (Suppl. 2):153-53. doi: 10.1111/obr.12151
722. Smith J, Morgan P, Saunders K, Lubans D. Improving physical self-perception in adolescent boys from disadvantaged communities: Psychological outcomes from the PALs intervention. *Journal of Science and Medicine in Sport* 2012;15:S344-S45. doi: 10.1016/j.jsams.2012.11.838
723. Taylor JC, Scherr RE, Linnell JD, et al. Impact of the Shaping Healthy Choices Program on Students' Lunchtime Fruit and Vegetable Consumption: A Randomized Controlled Trial of a Multi-Component School-Based Nutrition Intervention. *Faseb Journal* 2016;30
724. Trevino RP, Pham T, Mobley C, et al. HEALTHY study school food service revenue and expense report. *J Sch Health* 2012;82(9):417-23. doi: 10.1111/j.1746-1561.2012.00717.x
725. Wang D, Stewart D, Chang C. A holistic school-based nutrition program fails to improve teachers' nutrition-related knowledge, attitudes and behaviour in rural China. *Health Education* 2016;116(5):467-75. doi: 10.1108/HE-05-2015-0018
726. Whittemore R, Grey M, Jeon S. Internet Obesity Prevention Programs are Effective for Adolescents. *Diabetes* 2012;61:A210-A10.
727. Widhalm K, Malina-Altzinger E, Czernin S, Knopf T. The viennese obesity prevention project EDDY. *Obesity Facts* 2018;11(suppl 1):18-18. doi: 10.1159/000489691
728. Xu F, Leslie E, Ware R, et al. The effectiveness of a cluster-randomized controlled childhood obesity prevention study among Chinese primary school students: cLICK-obesity. *Obesity Reviews* 2014;15 (Suppl. 2):236-36. doi: 10.1111/obr.12153
729. Xu H, Li Y, Du S, et al. Cost-utility and cost-benefit analyses of school-based obesity prevention program. *BMC Public Health* 2020;20(1):1608. doi: 10.1186/s12889-020-09718-x

730. ChiCTR2000033945. Reducing the intake of beverages among primary school students [cited 2021 Sep 01]. 2020. Available from: <http://www.chictr.org.cn/showproj.aspx?proj=55267>.
731. IRCT20171005036570N1. The effect of Iranian medicine education on nutritional behavior of students [cited 2021 Sep 01]. 2018. Available from: <http://en.irct.ir/trial/33394>.
732. ISRCTN11371954. VisezEau® (ReachforWater): a project to learn how to increase drinking of tap water and reduce drinking of bottled and sugary drinks among primary school children, with the aim of encouraging healthy weight and protecting the environment [cited 2021 Sep 01]. 2020. Available from: <http://isrctn.com/ISRCTN11371954>.
733. UMIN000037151. Effectiveness of an Integrated School-Based Intervention Programme in Reducing Obesity among Adolescents in Seremban, Negeri Sembilan [cited 2021 Sep 01]. 2020. Available from: [https://upload.umin.ac.jp/cgi-open-bin/ctr\\_e/ctr\\_view.cgi?recptno=R000042334](https://upload.umin.ac.jp/cgi-open-bin/ctr_e/ctr_view.cgi?recptno=R000042334).
734. NCT04184804. Feasibility Trial on Organic Fruit and Vegetable Consumption in Primary School-children [cited 2021 Sep 01]. 2020. Available from: <https://ClinicalTrials.gov/show/NCT04184804>.
735. NCT03283033. School Lunch Salad Bars and Fruit and Vegetable Consumption [cited 2021 Sep 01]. 2017. Available from: <https://ClinicalTrials.gov/show/NCT03283033>.
736. ISRCTN62287542. Effectiveness of a peer-led, school-based intervention to promote healthy food choices in adolescents [cited 2022 Jul 10]. 2021. Available from: <https://www.isrctn.com/ISRCTN62287542>.
737. ISRCTN68114155. Cooking in Yorkshire [cited 2022 Jul 10]. 2021. Available from: <https://www.isrctn.com/ISRCTN68114155>.
738. Baranowski T, Baranowski J, Cullen KW, et al. Squire's Quest! Dietary outcome evaluation of a multimedia game. *Am J Prev Med* 2003;24(1):52-61. doi: 10.1016/s0749-3797(02)00570-6
739. Cullen KW, Watson K, Baranowski T, Baranowski JH, Zakeri I. Squire's quest: intervention changes occurred at lunch and snack meals. *Appetite* 2005;45(2):148-51. doi: 10.1016/j.appet.2005.04.001
740. Barnes C, Hall A, Nathan N, et al. Efficacy of a school-based physical activity and nutrition intervention on child weight status: Findings from a cluster randomized controlled trial1. *Prev Med* 2021;153:106822. doi: 10.1016/j.ypmed.2021.106822
741. Domel SB, Baranowski T, Davis H, et al. Development and evaluation of a school intervention to increase fruit and vegetable consumption among 4th and 5th grade students. *J Nutr Educ* 1993;25(6):345-49. doi: 10.1016/S0022-3182(12)80224-X
742. Evans CE, Ransley JK, Christian MS, et al. A cluster-randomised controlled trial of a school-based fruit and vegetable intervention: Project Tomato. *Public Health Nutr* 2013;16(6):1073-81. doi: 10.1017/S1368980012005290
743. Fonseca LG, Bertolin MNT, Gubert MB, da Silva EF. Effects of a nutritional intervention using pictorial representations for promoting knowledge and practices of healthy eating among Brazilian adolescents. *Plos One* 2019;14(3) doi: ARTN e0213277  
10.1371/journal.pone.0213277
744. Gold A, Larson M, Tucker J, Strang M. - Classroom Nutrition Education Combined With Fruit and Vegetable Taste Testing Improves Children's Dietary Intake. 2017;- 87(- 2)

745. Kandiah J, Jones C. - Nutrition knowledge and food choices of elementary school children. 2002;- 172(- 3)
746. Katz DL, Katz CS, Treu JA, et al. - Teaching healthful food choices to elementary school students and their parents: the Nutrition Detectives™ program. 2011;- 81(- 1)
747. Lehto R, Määttä S, Lehto E, et al. The PRO GREENS intervention in Finnish schoolchildren - the degree of implementation affects both mediators and the intake of fruits and vegetables. *Br J Nutr* 2014;112(7):1185-94. doi: 10.1017/s0007114514001767
748. Martens MK, Van Assema P, Paulussen TG, Van Breukelen G, Brug J. Krachtvoer: effect evaluation of a Dutch healthful diet promotion curriculum for lower vocational schools. *Public Health Nutr* 2008;11(3):271-8. doi: 10.1017/S1368980007000298
749. Najimi A, Ghaffari M. Promoting fruit and vegetable consumption among students: a randomized controlled trial based on social cognitive theory. *Journal of the Pakistan Medical Association* 2013;63(10):1235-40.
750. Perikkou A, Gavrieli A, Kougioufa MM, Tzirkali M, Yannakoulia M. A novel approach for increasing fruit consumption in children. *J Acad Nutr Diet* 2013;113(9):1188-93. doi: 10.1016/j.jand.2013.05.024
751. Smit CR, de Leeuw RN, Bevelander KE, et al. Promoting water consumption among children: a three-arm cluster randomised controlled trial testing a social network intervention. *Public Health Nutr* 2020;24(8):2324-36. doi: 10.1017/s1368980020004802
752. Vandongen R, Jenner DA, Thompson C, et al. A controlled evaluation of a fitness and nutrition intervention program on cardiovascular health in 10- to 12-year-old children. *Prev Med* 1995;24(1):9-22. doi: 10.1006/pmed.1995.1003
753. Viggiano A, Viggiano E, Di Costanzo A, et al. - Kaledo, a board game for nutrition education of children and adolescents at school: cluster randomized controlled trial of healthy lifestyle promotion. 2015;- 174(- 2)
754. Ask AS, Hernes S, Aarek I, et al. Serving of free school lunch to secondary-school pupils - a pilot study with health implications. *Public Health Nutr* 2010;13(2):238-44. doi: 10.1017/S1368980009990772
755. Rajbhandari-Thapa J, Vandellen M, Just D, Panda S. Fun facts about fruits and vegetables can improve consumption. *Journal of Child Nutrition & Management* 2020;44(2):n2.
756. Ashfield-Watt PA, Stewart EA, Scheffer JA. A pilot study of the effect of providing daily free fruit to primary-school children in Auckland, New Zealand. *Public Health Nutr* 2009;12(5):693-701. doi: 10.1017/S1368980008002954
757. Birnbaum AS, Lytle LA, Story M, Perry CL, Murray DM. Are differences in exposure to a multicomponent school-based intervention associated with varying dietary outcomes in adolescents? *Health Educ Behav* 2002;29(4):427-43. doi: 10.1177/109019810202900404
758. Lytle LA, Murray DM, Perry CL, et al. School-based approaches to affect adolescents' diets: results from the TEENS study. *Health Educ Behav* 2004;31(2):270-87. doi: 10.1177/1090198103260635
759. Chellappah J, Tonkin A, Gregg MED, Reid C. - A randomized controlled trial of effects of fruit intake on cardiovascular disease risk factors in children (FIST Study). 2015;- 7(- 1)

760. Cohen JF, Richardson SA, Cluggish SA, et al. Effects of choice architecture and chef-enhanced meals on the selection and consumption of healthier school foods: a randomized clinical trial. *JAMA Pediatr* 2015;169(5):431-7. doi: 10.1001/jamapediatrics.2014.3805
761. Marcano-Olivier M, Pearson R, Ruparell A, et al. A low-cost Behavioural Nudge and choice architecture intervention targeting school lunches increases children's consumption of fruit: a cluster randomised trial. *Int J Behav Nutr Phys Act* 2019;16(1):20. doi: 10.1186/s12966-019-0773-x
762. Moore L, Tapper K. The impact of school fruit tuck shops and school food policies on children's fruit consumption: a cluster randomised trial of schools in deprived areas. *J Epidemiol Community Health* 2008;62(10):926-31. doi: 10.1136/jech.2007.070953
763. Perry CL, Bishop DB, Taylor GL, et al. A randomized school trial of environmental strategies to encourage fruit and vegetable consumption among children. *Health Educ Behav* 2004;31(1):65-76.
764. Anderson AS, Porteous LE, Foster E, et al. The impact of a school-based nutrition education intervention on dietary intake and cognitive and attitudinal variables relating to fruits and vegetables. *Public Health Nutr* 2005;8(6):650-6. doi: 10.1079/phn2004721
765. Baranowski T, Davis M, Resnicow K, et al. Gimme 5 fruit, juice, and vegetables for fun and health: outcome evaluation. *Health Educ Behav* 2000;27(1):96-111. doi: 10.1177/109019810002700109
766. Bere E, Veierød MB, Bjelland M, Klepp KI. - Outcome and process evaluation of a Norwegian school-randomized fruit and vegetable intervention: Fruits and Vegetables Make the Marks (FVMM). *Health Educ Res* 2006a;21(2)
767. Ovrebo B, Stea TH, Velde SJ, et al. A comprehensive multicomponent school-based educational intervention did not affect fruit and vegetable intake at the 14-year follow-up. *Prev Med* 2019;121:79-85.
768. Bere E, Veierød MB, Bjelland M, Klepp KI. Free school fruit--sustained effect 1 year later. *Health Educ Res* 2006b;21(2):268-75. doi: 10.1093/her/cyh063
769. Bere E, Klepp KI, Overby NC. Free school fruit: can an extra piece of fruit every school day contribute to the prevention of future weight gain? A cluster randomized trial. *Food Nutr Res* 2014;58
770. Bere E, te Velde SJ, Smastuen MC, Twisk J, Klepp KI. One year of free school fruit in Norway--7 years of follow-up. *Int J Behav Nutr Phys Act* 2015;12:139. doi: 10.1186/s12966-015-0301-6
771. Davis JN, Pérez A, Asigbee FM, et al. School-based gardening, cooking and nutrition intervention increased vegetable intake but did not reduce BMI: Texas sprouts - a cluster randomized controlled trial. *Int J Behav Nutr Phys Act* 2021;18(1):18. doi: 10.1186/s12966-021-01087-x
772. Foster GD, Sherman S, Borradaile KE, et al. A policy-based school intervention to prevent overweight and obesity. *Pediatrics* 2008;121(4):e794-802. doi: 10.1542/peds.2007-1365
773. Greene KN, Gabrielyan G, Just DR, Wansink B. Fruit-Promoting Smarter Lunchrooms Interventions: Results From a Cluster RCT. *Am J Prev Med* 2017;52(4):451-58. doi: 10.1016/j.amepre.2016.12.015

774. He M, Beynon C, Sangster Bouck M, et al. Impact evaluation of the Northern Fruit and Vegetable Pilot Programme - a cluster-randomised controlled trial. *Public Health Nutr* 2009;12(11):2199-208. doi: 10.1017/S1368980009005801
775. Hoppu U, Lehtisalo J, Kujala J, et al. The diet of adolescents can be improved by school intervention. *Public Health Nutr* 2010;13(6A):973-9. doi: 10.1017/S1368980010001163
776. LaChausse RG. A clustered randomized controlled trial to determine impacts of the Harvest of the Month program. *Health Educ Res* 2017;32(5):375-83. doi: 10.1093/her/cyx056
777. Lent MR, Vander Veur SS, McCoy TA, et al. A randomized controlled study of a healthy corner store initiative on the purchases of urban, low-income youth. *Obesity (Silver Spring)* 2014;22(12):2494-500. doi: 10.1002/oby.20878
778. Meng L, Xu H, Liu A, et al. The costs and cost-effectiveness of a school-based comprehensive intervention study on childhood obesity in China. *PLoS One* 2013;8(10):e77971. doi: 10.1371/journal.pone.0077971
779. Nicklas TA, Johnson CC, Myers L, Farris RP, Cunningham A. Outcomes of a high school program to increase fruit and vegetable consumption: Gimme 5--a fresh nutrition concept for students. *J Sch Health* 1998;68(6):248-53. doi: 10.1111/j.1746-1561.1998.tb06348.x
780. Perry CL, Bishop DB, Taylor G, et al. Changing fruit and vegetable consumption among children: the 5-a-Day Power Plus program in St. Paul, Minnesota. *Am J Public Health* 1998;88(4):603-9. doi: 10.2105/ajph.88.4.603
781. Ooi JY, Wolfenden L, Yoong SL, et al. A trial of a six-month sugar-sweetened beverage intervention in secondary schools from a socio-economically disadvantaged region in Australia. *Aust N Z J Public Health* 2021;45(6):599-607. doi: 10.1111/1753-6405.13159
782. Sutherland R, Ying Ooi J, Finch M, et al. A cluster randomised controlled trial of a secondary school intervention to reduce intake of sugar-sweetened beverages: Mid-intervention impact of switchURsip environmental strategies. *Health Promot J Austr* 2021;33(1):176-86. doi: 10.1002/hpja.469
783. Polonsky HM, Bauer KW, Fisher JO, et al. Effect of a Breakfast in the Classroom Initiative on Obesity in Urban School-aged Children: A Cluster Randomized Clinical Trial. *JAMA Pediatr* 2019;173(4):326-33. doi: 10.1001/jamapediatrics.2018.5531
784. Reynolds KD, Franklin FA, Binkley D, et al. Increasing the fruit and vegetable consumption of fourth-graders: results from the high 5 project. *Prev Med* 2000;30(4):309-19. doi: 10.1006/pmed.1999.0630
785. Scherr RE, Linnell JD, Dharmar M, et al. A Multicomponent, School-Based Intervention, the Shaping Healthy Choices Program, Improves Nutrition-Related Outcomes. *J Nutr Educ Behav* 2017;49(5):368-79 e1. doi: 10.1016/j.jneb.2016.12.007
786. Taylor JC, Zidenberg-Cherr S, Linnell JD, Feenstra G, Scherr RE. Impact of a multicomponent, school-based nutrition intervention on students' lunchtime fruit and vegetable availability and intake: A pilot study evaluating the Shaping Healthy Choices Program. *Journal of Hunger & Environmental Nutrition* 2017;13(3):415-28. doi: 10.1080/19320248.2017.1374899
787. Sevinc O, Bozkurt AI, Gundogdu M, et al. Evaluation of the effectiveness of an intervention program on preventing childhood obesity in Denizli, Turkey. *Turkish Journal of Medical Sciences* 2011;41(6):1097-105. doi: 10.3906/sag-1009-1179

788. Te Velde SJ, Brug J, Wind M, et al. Effects of a comprehensive fruit- and vegetable-promoting school-based intervention in three European countries: the Pro Children Study. *Br J Nutr* 2008;99(4):893-903.
789. Zota D, Dalma A, Petralias A, et al. Promotion of healthy nutrition among students participating in a school food aid program: a randomized trial. *Int J Public Health* 2016;61(5):583-92.
790. Zhu Z, Luo C, Qu S, et al. Effects of School-Based Interventions on Reducing Sugar-Sweetened Beverage Consumption among Chinese Children and Adolescents. *Nutrients* 2021;13(6) doi: 10.3390/nu13061862
